# Supplementary material for: Decitabine Response in Breast Cancer Requires Efficient Drug Processing and Is Not Limited by Multidrug Resistance
Source: Oxford University Press journal article supplement (doi:10.1158/1535-7163.mct-19-0745), 2020-03-10
Supplement: 15357163mct190745-sup-226501_2_supp_6105715_q5yvj0.xlsx [file 15357163mct190745-sup-226501_2_supp_6105715_q5yvj0.xlsx]

## Sheet: 231
		1stExon	1stExon	1stExon	3'UTR	3'UTR	3'UTR	5'UTR	5'UTR	5'UTR	Body	Body	Body	TSS1500	TSS1500	TSS1500	TSS200	TSS200	TSS200
Row Labels	Gene expression Regulation by decitabine in MDA-MB-231	B.Value 231 NT	B.Value 231 DAC	DAC-NT	B.Value 231 NT	B.Value 231 DAC	DAC-NT	B.Value 231 NT	B.Value 231 DAC	DAC-NT	B.Value 231 NT	B.Value 231 DAC	DAC-NT	B.Value 231 NT	B.Value 231 DAC	DAC-NT	B.Value 231 NT	B.Value 231 DAC	DAC-NT
AADAC	up	0.867269	0.760686	-0.106583							0.94798	0.755286	-0.192694	0.517336	0.398813	-0.118522
AADACL3					0.0462995	0.0478307	0.00153117	0.302905	0.244612	-0.0582934	0.120986	0.110703	-0.0102834	0.17553	0.146732	-0.0287985	0.0864821	0.0763125	-0.0101696
AARS		0.00658447	0.00747296	0.000888493	0.941124	0.709165	-0.23196	0.453432	0.346781	-0.106651	0.785826	0.599894	-0.185931	0.152853	0.116466	-0.0363869	0.0238813	0.0235242	-0.00035716
ABCA12					0.164309	0.141349	-0.0229597				0.536143	0.344981	-0.191162	0.896759	0.696946	-0.199814	0.192938	0.156826	-0.0361122
ABCA2					0.801894	0.703256	-0.0986383				0.845805	0.666933	-0.178872	0.217136	0.186214	-0.0309218
ABCA5	up							0.401066	0.305858	-0.0952075	0.912948	0.722313	-0.190635	0.280463	0.216039	-0.0644234	0.353672	0.277501	-0.0761714
ABCA6		0.682908	0.474134	-0.208774										0.503645	0.375896	-0.12775	0.0986215	0.143226	0.0446048
ABCA9					0.460509	0.357143	-0.103365	0.596364	0.440198	-0.156166	0.799252	0.739699	-0.0595523	0.44761	0.353653	-0.0939563	0.246919	0.17781	-0.0691092
ABCB1								0.553886	0.402849	-0.151037	0.536302	0.399706	-0.136597
ABCD3		0.033899	0.0375279	0.00362887	0.930041	0.702348	-0.227693				0.252338	0.197652	-0.0546863	0.19892	0.151944	-0.0469756	0.0499108	0.0570186	0.00710773
ABCG1					0.333686	0.255918	-0.0777679	0.746092	0.604915	-0.141177	0.439789	0.341988	-0.0978008	0.398295	0.328117	-0.0701784
ABCG2	up	0.0776058	0.0583147	-0.019291				0.79827	0.606475	-0.191795	0.160902	0.105725	-0.0551769	0.135454	0.118622	-0.016832	0.048745	0.0477206	-0.00102436
ABHD3		0.0312615	0.0299286	-0.00133292							0.304313	0.219546	-0.0847673	0.0786201	0.0680553	-0.0105648	0.0325414	0.0329331	0.000391729
ABL2		0.0878794	0.0858404	-0.00203902	0.900358	0.685716	-0.214642				0.627839	0.451834	-0.176005	0.462874	0.347433	-0.115441	0.0722923	0.0626157	-0.00967661
ABLIM3					0.709072	0.560647	-0.148424	0.634983	0.552003	-0.0829801	0.609673	0.478994	-0.130679	0.807939	0.572494	-0.235444	0.592401	0.507146	-0.0852549
ACAD10					0.894305	0.658015	-0.23629	0.228402	0.17611	-0.052292	0.806989	0.661154	-0.145835	0.110665	0.0882534	-0.022412	0.0512653	0.0504785	-0.000786748
ACBD7		0.0622313	0.0602156	-0.00201569							0.333943	0.257229	-0.0767143	0.145358	0.0989733	-0.046385	0.0693386	0.0645409	-0.00479768
ACE2		0.105309	0.124511	0.0192023	0.326463	0.214028	-0.112436	0.698887	0.531729	-0.167158	0.137299	0.11819	-0.0191087	0.515726	0.399541	-0.116185	0.4263	0.316749	-0.109552
ACRC	up										0.748226	0.60027	-0.147956	0.931554	0.713176	-0.218377	0.89005	0.668177	-0.221873
ACSL1					0.844831	0.597536	-0.247295	0.422903	0.32562	-0.0972828	0.778274	0.57572	-0.202554	0.231865	0.182786	-0.0490791	0.065418	0.0680565	0.00263858
ACTBL2	up	0.917364	0.651956	-0.265408										0.832903	0.629601	-0.203302	0.371534	0.304709	-0.0668252
ACVR1		0.0936306	0.0736589	-0.0199717				0.439043	0.309097	-0.129947	0.712463	0.455538	-0.256925	0.0964054	0.0827335	-0.0136719
ADAD1	up							0.84718	0.604072	-0.243108	0.684251	0.516531	-0.16772	0.524983	0.3552	-0.169784
ADAMTS6		0.0516694	0.0545554	0.00288601	0.729505	0.595771	-0.133734	0.926043	0.73456	-0.191483	0.634707	0.497217	-0.13749	0.0688775	0.0686001	-0.000277382	0.0534935	0.050033	-0.00346047
ADCK1								0.251578	0.189737	-0.0618404	0.39423	0.308624	-0.0856056	0.869495	0.678333	-0.191162	0.0647225	0.0505232	-0.0141994
ADM					0.122134	0.0815569	-0.0405768	0.0509004	0.0512909	0.000390545	0.33972	0.281257	-0.0584625	0.0680899	0.0665616	-0.00152832	0.0373103	0.0411703	0.00386002
ADRB2		0.0593535	0.0629792	0.00362571										0.0866741	0.0839485	-0.00272563	0.0513166	0.0579819	0.00666539
AGRN		0.0467652	0.0427854	-0.00397986	0.896131	0.745785	-0.150346				0.842058	0.668292	-0.173766	0.0638399	0.0638945	5.4586e-05	0.0647306	0.0680855	0.00335489
AIM1		0.0536318	0.0590023	0.00537056	0.910935	0.579467	-0.331469				0.522924	0.373084	-0.14984	0.0860905	0.0823583	-0.0037322	0.0579444	0.0529684	-0.00497605
AIM2	up							0.484931	0.355036	-0.129895				0.0830981	0.0729644	-0.0101337	0.0574591	0.0596393	0.00218018
AKR1B10		0.66757	0.512707	-0.154863	0.685762	0.571915	-0.113847				0.462352	0.303674	-0.158677	0.880874	0.642913	-0.237961	0.448339	0.345902	-0.102437
AKR1C2					0.780336	0.617654	-0.162682	0.13921	0.12473	-0.0144798	0.591759	0.429408	-0.162351	0.453867	0.363224	-0.0906434	0.604091	0.477435	-0.126656
ALDH1A1											0.667702	0.590497	-0.0772054	0.422872	0.323386	-0.0994864
ALDH1L2	up										0.603821	0.448248	-0.155572	0.91487	0.663579	-0.251291	0.0684606	0.0603044	-0.00815624
ALDH2		0.00882183	0.00810577	-0.000716054	0.724022	0.562588	-0.161435	0.0696612	0.0662603	-0.00340093	0.491238	0.38402	-0.107219	0.9189	0.682261	-0.236639	0.252634	0.201159	-0.0514751
ALDH3B2		0.28473	0.231278	-0.0534522	0.54918	0.443203	-0.105977	0.237138	0.204322	-0.0328157	0.463625	0.337564	-0.126062	0.245034	0.201227	-0.0438067
ALKBH8								0.0684411	0.0642059	-0.0042352	0.175361	0.112107	-0.0632547	0.349767	0.250774	-0.0989934	0.0545807	0.0477592	-0.00682147
ALPK1		0.0624804	0.0705262	0.00804579	0.517321	0.380219	-0.137103	0.691294	0.530103	-0.161191	0.757454	0.576861	-0.180594				0.0646205	0.0595262	-0.0050943
ALX1	up	0.648187	0.509635	-0.138553							0.900296	0.714578	-0.185718	0.755605	0.569237	-0.186368	0.895648	0.66326	-0.232388
ALX3		0.807914	0.632419	-0.175494	0.815742	0.559609	-0.256134				0.797177	0.611257	-0.185919	0.663518	0.512663	-0.150854	0.680849	0.503887	-0.176962
AMN1					0.80884	0.655797	-0.153043	0.0580816	0.0611484	0.00306672	0.366333	0.298063	-0.0682694	0.247152	0.156612	-0.0905399	0.0742127	0.0785685	0.00435577
AMOT		0.0478147	0.040043	-0.00777167	0.0796779	0.0687375	-0.0109404	0.0758564	0.0652081	-0.0106482	0.471031	0.323069	-0.147961	0.0678934	0.0573687	-0.0105247	0.122869	0.112562	-0.0103068
ANGPT1	up	0.0826907	0.0662836	-0.016407	0.688729	0.514004	-0.174726	0.0755276	0.0560785	-0.0194491	0.594049	0.436227	-0.157822	0.864897	0.593224	-0.271673	0.803197	0.604959	-0.198238
ANGPT2	up	0.977124	0.755884	-0.22124	0.857898	0.570946	-0.286952	0.853453	0.580573	-0.27288	0.901556	0.68695	-0.214606	0.873199	0.661897	-0.211302	0.894626	0.636312	-0.258314
ANK1		0.912423	0.708883	-0.203541	0.502808	0.412133	-0.0906752				0.624779	0.475754	-0.149025	0.698754	0.553077	-0.145677	0.555533	0.457503	-0.0980295
ANK2	down	0.613169	0.451665	-0.161504	0.534818	0.417506	-0.117312	0.435603	0.322618	-0.112985	0.695989	0.522586	-0.173403	0.89733	0.622448	-0.274881	0.578326	0.434237	-0.144089
ANKFN1		0.303355	0.192064	-0.111291							0.287914	0.208333	-0.0795814	0.456839	0.342361	-0.114478	0.311949	0.2539	-0.0580483
ANKH		0.121453	0.103822	-0.0176307	0.896614	0.642979	-0.253634				0.708371	0.515372	-0.192998	0.202873	0.167832	-0.0350417	0.0479616	0.0591652	0.0112036
ANKMY2					0.812158	0.670376	-0.141782				0.892884	0.606941	-0.285943
ANKRD1		0.0397889	0.047984	0.0081951							0.117212	0.0939282	-0.0232839	0.88057	0.660615	-0.219955	0.0552871	0.0485166	-0.00677051
ANKRD11					0.715963	0.571738	-0.144225	0.814167	0.623179	-0.190988	0.869953	0.674056	-0.195897	0.0627833	0.0569366	-0.00584668	0.0193935	0.0398979	0.0205044
ANKRD2		0.926519	0.762707	-0.163811	0.562855	0.489358	-0.0734965	0.165094	0.142003	-0.0230904	0.847377	0.63369	-0.213687	0.798688	0.598917	-0.199771	0.259304	0.210441	-0.0488631
ANKRD22		0.0642392	0.0542557	-0.00998354	0.876808	0.641825	-0.234983				0.37363	0.25564	-0.117989	0.883582	0.602577	-0.281006	0.284054	0.212762	-0.0712925
ANKRD26P1	up										0.982132	0.747134	-0.234998	0.498618	0.421106	-0.0775117	0.951078	0.657454	-0.293624
ANO4		0.134151	0.113264	-0.0208864	0.121085	0.0955096	-0.0255754	0.147848	0.114717	-0.0331312	0.285298	0.227712	-0.0575858	0.117224	0.0867141	-0.03051	0.234086	0.198485	-0.0356009
ANPEP					0.480265	0.404574	-0.075691	0.724297	0.56889	-0.155407	0.70263	0.599094	-0.103536	0.851064	0.652216	-0.198848	0.855941	0.734841	-0.1211
ANTXR2					0.824764	0.703467	-0.121297	0.0782619	0.0734827	-0.00477914	0.785956	0.555314	-0.230642				0.0587579	0.0570569	-0.00170103
ANXA3					0.90025	0.649714	-0.250536	0.0406968	0.0376098	-0.00308705	0.782976	0.578922	-0.204054	0.811853	0.580558	-0.231295	0.389766	0.285379	-0.104388
AOX1		0.598508	0.51922	-0.079288							0.805951	0.604953	-0.200999	0.642321	0.487179	-0.155142	0.632073	0.483194	-0.148878
APOD		0.472309	0.408815	-0.0634933	0.249572	0.210468	-0.039104				0.780995	0.58358	-0.197415	0.581926	0.44409	-0.137836
APOL6					0.852184	0.728813	-0.123371	0.0953431	0.0951322	-0.000210911	0.875944	0.674728	-0.201216	0.267214	0.216478	-0.0507357	0.213138	0.158957	-0.0541808
AR		0.326836	0.263349	-0.0634872	0.0541003	0.0568757	0.00277544				0.39164	0.296252	-0.0953884	0.297636	0.229478	-0.0681577	0.223597	0.159766	-0.0638312
AREG		0.0395686	0.0410995	0.00153091							0.0685599	0.0659623	-0.0025976	0.516876	0.368967	-0.147909
ARHGAP29		0.0264375	0.0289755	0.00253798				0.324672	0.26126	-0.0634115	0.926098	0.807449	-0.118649	0.358863	0.27469	-0.0841725	0.090355	0.0821949	-0.0081602
ARHGDIB					0.846895	0.60952	-0.237375	0.192406	0.148475	-0.0439313	0.807503	0.609877	-0.197626	0.877453	0.585752	-0.2917	0.579551	0.407889	-0.171662
ARHGEF2					0.898688	0.713501	-0.185187	0.00572208	0.0126596	0.00693749	0.605093	0.475333	-0.12976	0.0739025	0.0763935	0.00249102
ARHGEF6		0.823749	0.597099	-0.22665	0.423895	0.338185	-0.0857098	0.821697	0.631425	-0.190271	0.280884	0.226375	-0.0545095	0.330341	0.274094	-0.0562464	0.508238	0.389505	-0.118733
ARHGEF9		0.0325898	0.0320626	-0.00052719	0.426559	0.310905	-0.115654				0.762019	0.619671	-0.142348	0.351322	0.257814	-0.0935087	0.0438867	0.0455651	0.00167838
ARL14	up	0.691158	0.494263	-0.196895	0.922723	0.589148	-0.333575
ARRDC3					0.92855	0.755461	-0.173089	0.0603812	0.0619805	0.00159927	0.898227	0.672659	-0.225568
ART4								0.94181	0.688361	-0.253449				0.786564	0.586589	-0.199976	0.894088	0.645967	-0.248121
ASNS	down	0.0392112	0.0406414	0.00143013	0.349997	0.223691	-0.126306	0.182439	0.141533	-0.0409065				0.815286	0.593497	-0.221788	0.0832196	0.0662856	-0.016934
ATAD2		0.0828416	0.079408	-0.00343359	0.927841	0.731297	-0.196545				0.261389	0.209435	-0.051954	0.0474684	0.0504877	0.00301936	0.022633	0.0193045	-0.0033285
ATAD5		0.0377889	0.0363898	-0.00139916							0.0502375	0.0451446	-0.00509285	0.547315	0.447629	-0.0996856	0.023563	0.0236703	0.000107262
ATF3	up	0.0388223	0.0408538	0.00203153	0.697639	0.515591	-0.182048	0.258536	0.20076	-0.0577764	0.907767	0.627484	-0.280283	0.269704	0.212126	-0.0575776	0.190743	0.147155	-0.0435878
ATF4					0.613204	0.476273	-0.136931	0.241053	0.22129	-0.0197633	0.0865548	0.0724281	-0.0141268	0.130278	0.123723	-0.00655465	0.0342824	0.0327691	-0.00151329
ATF5					0.892513	0.695869	-0.196644
ATF6B		0.0155989	0.0125723	-0.00302661							0.565131	0.41857	-0.146561	0.565579	0.420294	-0.145285	0.0828962	0.0824206	-0.000475553
ATF7								0.412945	0.328791	-0.0841544	0.436592	0.343249	-0.0933432	0.59018	0.408397	-0.181783	0.17856	0.182368	0.00380877
ATF7IP2					0.175464	0.142723	-0.0327411	0.232198	0.168672	-0.0635257				0.0572055	0.0586018	0.0013963
ATG10								0.394114	0.324802	-0.0693122	0.490414	0.360095	-0.130319	0.126407	0.114725	-0.0116816	0.0177276	0.00993313	-0.0077945
ATP13A5		0.084747	0.0780913	-0.00665575							0.272882	0.218934	-0.0539484	0.247	0.203707	-0.0432927	0.263863	0.199697	-0.0641664
ATP1B1		0.063349	0.0601241	-0.00322486							0.214282	0.170488	-0.0437936	0.181712	0.132724	-0.0489875
ATP6V0A4		0.30221	0.262656	-0.0395535	0.893005	0.576474	-0.316531	0.809895	0.587067	-0.222829	0.896093	0.655404	-0.240689
ATP6V0C								0.0242972	0.0216724	-0.00262486	0.129794	0.106311	-0.0234831	0.665531	0.531001	-0.13453	0.00201528	0.00262982	0.000614544
ATP6V0D1		0.0462027	0.0407838	-0.00541889	0.715877	0.597528	-0.118349				0.684682	0.516309	-0.168373	0.553293	0.430515	-0.122778	0.0100389	0.0034293	-0.00660964
ATP6V0D2								0.208439	0.153787	-0.0546522	0.872137	0.569846	-0.302291	0.787459	0.565783	-0.221676	0.176848	0.134637	-0.0422113
ATP6V1B1		0.347967	0.289158	-0.0588095	0.766008	0.630757	-0.135251				0.419391	0.311584	-0.107807	0.476489	0.345921	-0.130568
ATP8A1								0.0495974	0.0548539	0.00525649	0.525611	0.384236	-0.141375	0.0668457	0.0691495	0.00230383	0.0346104	0.0313924	-0.00321801
ATP8B1	down	0.959367	0.789079	-0.170288							0.940051	0.692155	-0.247895	0.786712	0.661132	-0.12558
ATP8B2					0.84957	0.64304	-0.20653	0.382114	0.31987	-0.0622441	0.360733	0.30107	-0.0596627	0.0879019	0.0794568	-0.00844518	0.243139	0.191433	-0.0517055
ATP9A					0.135261	0.111177	-0.0240848				0.412992	0.317131	-0.0958614	0.664565	0.479813	-0.184752
AXL		0.0799786	0.08317	0.0031914				0.0753939	0.080489	0.00509509	0.184727	0.166158	-0.0185691	0.478927	0.381822	-0.0971054	0.057654	0.0517778	-0.00587624
AZGP1					0.229102	0.18012	-0.0489824				0.309725	0.24475	-0.0649746	0.265799	0.213531	-0.0522672	0.199808	0.179483	-0.0203252
AZI2		0.0592094	0.054683	-0.00452641				0.355396	0.22409	-0.131306	0.908206	0.591049	-0.317157	0.0317762	0.0273343	-0.00444185	0.0854432	0.0794582	-0.005985
BACH1	up							0.704038	0.528941	-0.175097	0.858198	0.615872	-0.242326	0.269194	0.199679	-0.0695147	0.0156006	0.0141028	-0.00149783
BBOX1								0.346391	0.250111	-0.0962794	0.0791821	0.0643597	-0.0148223	0.118254	0.0969399	-0.0213141	0.0712362	0.0565795	-0.0146567
BCAS3					0.898527	0.618552	-0.279975	0.107775	0.0934144	-0.0143608	0.675189	0.507327	-0.167862	0.0465811	0.0482827	0.00170161	0.0541612	0.0526027	-0.00155848
BCL11B		0.511167	0.41149	-0.0996776	0.343942	0.296876	-0.0470667				0.430391	0.333149	-0.0972424	0.171792	0.125492	-0.0462998	0.296361	0.205917	-0.0904444
BCL2A1	up	0.815908	0.626768	-0.18914							0.860987	0.652147	-0.20884	0.883501	0.706072	-0.177428
BCL2L11		0.0447007	0.0369819	-0.00771886	0.93447	0.674494	-0.259976	0.166978	0.138087	-0.0288909	0.846246	0.696165	-0.150081	0.498579	0.353093	-0.145486	0.0271321	0.0253624	-0.00176968
BCL2L13								0.217624	0.207842	-0.00978233	0.0626488	0.0539077	-0.00874112	0.0506485	0.0611028	0.0104543	0.066601	0.0652061	-0.00139483
BCORL1					0.916379	0.787306	-0.129073	0.33435	0.273955	-0.0603959	0.899215	0.745244	-0.15397	0.0777969	0.0693828	-0.00841412	0.0304549	0.0286005	-0.00185439
BDKRB1								0.175271	0.142789	-0.0324815	0.477453	0.384639	-0.0928137	0.194106	0.160512	-0.0335935	0.657299	0.532064	-0.125235
BEX1	up				0.246176	0.163135	-0.0830416	0.746699	0.623993	-0.122705	0.900917	0.795478	-0.105439	0.325684	0.266638	-0.0590452	0.657528	0.563691	-0.0938373
BICC1		0.19609	0.161221	-0.0348691	0.871159	0.600732	-0.270427				0.689854	0.498091	-0.191763	0.730356	0.518051	-0.212305	0.0706553	0.0755615	0.00490612
BIRC3	up	0.0798324	0.0872338	0.00740145	0.826556	0.635145	-0.19141	0.0745326	0.0887485	0.0142159	0.878719	0.597469	-0.28125	0.0522327	0.0510911	-0.00114157	0.0465784	0.0427661	-0.00381231
BLNK		0.0772984	0.0766672	-0.00063126				0.0946267	0.07947	-0.0151567	0.211041	0.163835	-0.0472059	0.0689568	0.0662458	-0.00271108	0.0523485	0.0559016	0.00355309
BMP3		0.100275	0.0899447	-0.0103301	0.921707	0.644491	-0.277216				0.226411	0.152698	-0.0737127	0.431251	0.316264	-0.114986	0.0846392	0.0711111	-0.0135281
BMP4		0.0578426	0.0673838	0.00954114				0.101719	0.0863123	-0.015407	0.805529	0.621617	-0.183912	0.160722	0.120194	-0.0405281	0.0621852	0.0678928	0.00570755
BNC1	up				0.201473	0.159533	-0.0419399				0.886502	0.618721	-0.267781	0.837693	0.577614	-0.26008
BRDT	up							0.799542	0.586856	-0.212686				0.547036	0.400101	-0.146935	0.648412	0.50083	-0.147582
BRI3BP		0.0390667	0.0384089	-0.000657754	0.913949	0.756675	-0.157274				0.69117	0.530141	-0.161029	0.122354	0.0854312	-0.0369232	0.0640798	0.0551795	-0.00890033
BRMS1L					0.91254	0.605965	-0.306575	0.0389305	0.0403797	0.00144919	0.218981	0.16109	-0.0578918	0.373941	0.301456	-0.0724853	0.0500839	0.049604	-0.000479873
BTBD2	down				0.898179	0.66688	-0.231299				0.886432	0.711363	-0.175069	0.924135	0.777132	-0.147003
BTBD9					0.840802	0.603687	-0.237115	0.492327	0.364052	-0.128275	0.710267	0.509144	-0.201124	0.122569	0.109286	-0.0132827	0.101464	0.0856391	-0.0158246
BTG3					0.921824	0.644019	-0.277805	0.0694486	0.0668867	-0.00256198	0.920034	0.610143	-0.309891	0.195104	0.164445	-0.0306596	0.0149487	0.0111968	-0.00375185
BVES	up				0.691221	0.519707	-0.171514	0.861778	0.621197	-0.240581	0.63762	0.460245	-0.177375	0.861148	0.647857	-0.213292
C10orf111					0.800983	0.659542	-0.141441				0.35361	0.283492	-0.0701182
C10orf25	up	0.186477	0.142915	-0.0435616	0.815238	0.541923	-0.273316				0.909802	0.677907	-0.231895				0.00792214	0.0100661	0.00214397
C11orf80											0.723376	0.54803	-0.175346	0.196447	0.174725	-0.0217216	0.021693	0.0189063	-0.00278669
C12orf5											0.614447	0.480553	-0.133894	0.124343	0.0991946	-0.0251488
C14orf159		0.0841683	0.0812997	-0.00286857	0.905226	0.688799	-0.216427	0.626454	0.48782	-0.138634	0.523358	0.357262	-0.166095	0.376353	0.293251	-0.0831017	0.0793753	0.0716662	-0.00770916
C15orf48	up	0.208851	0.142939	-0.0659127				0.0611731	0.0426308	-0.0185423	0.888709	0.653491	-0.235218	0.363485	0.277515	-0.0859705	0.054203	0.0483987	-0.0058043
C16orf74					0.623199	0.526848	-0.0963513	0.423157	0.332406	-0.0907508	0.835529	0.637925	-0.197603	0.540248	0.423742	-0.116507
C17orf104	up	0.858513	0.506532	-0.351981							0.794477	0.583726	-0.210751	0.877879	0.710926	-0.166952	0.844025	0.652036	-0.191989
C17orf75		0.0119483	0.00948561	-0.00246273	0.883078	0.582567	-0.300511				0.296361	0.226273	-0.0700879	0.886423	0.657285	-0.229138	0.140502	0.121545	-0.018957
C19orf54		0.608801	0.485354	-0.123447	0.865385	0.615324	-0.250061				0.627802	0.51059	-0.117212	0.0601929	0.0598853	-0.000307539	0.275579	0.24272	-0.0328591
C1orf146	up							0.850595	0.631429	-0.219166	0.517448	0.357147	-0.160301	0.675146	0.544264	-0.130883	0.770365	0.601291	-0.169074
C1orf168		0.758053	0.586161	-0.171892							0.444045	0.330307	-0.113737	0.607408	0.457854	-0.149554	0.336353	0.271148	-0.065205
C1RL					0.505481	0.438222	-0.0672595				0.47917	0.37316	-0.10601	0.553822	0.43942	-0.114402	0.0716006	0.0636629	-0.00793766
C2orf88					0.875063	0.588433	-0.286631	0.3139	0.235925	-0.0779759	0.921555	0.677792	-0.243763	0.38108	0.274401	-0.106679	0.578477	0.453634	-0.124843
C3orf52		0.0743448	0.0758788	0.00153392	0.796648	0.700897	-0.0957508				0.509706	0.36549	-0.144216	0.357029	0.292317	-0.0647125	0.107725	0.0835389	-0.0241864
C4BPB	up	0.440794	0.298661	-0.142133				0.425057	0.314259	-0.110798	0.457415	0.380843	-0.0765722	0.127524	0.091856	-0.0356679
C6orf203	down	0.00955425	0.0165837	0.00702947				0.114823	0.101104	-0.0137191	0.910544	0.686307	-0.224236	0.935332	0.630553	-0.304779	0.0675023	0.0598919	-0.00761041
C6orf48								0.0852209	0.0791611	-0.00605983	0.594504	0.470774	-0.123731	0.403801	0.326032	-0.0777686	0.0390727	0.0391785	0.000105741
C9orf152								0.384488	0.335642	-0.0488459	0.64964	0.48838	-0.16126				0.468018	0.386084	-0.0819337
C9orf64		0.0773824	0.0787097	0.00132734				0.0942287	0.10142	0.00719178	0.844443	0.665348	-0.179095	0.0827793	0.0686101	-0.0141692	0.0891589	0.101925	0.0127666
C9orf84	up										0.533516	0.386144	-0.147372	0.440043	0.325761	-0.114283	0.890704	0.649086	-0.241618
C9orf91					0.896067	0.667469	-0.228598	0.289414	0.241491	-0.0479222	0.933526	0.731828	-0.201698	0.643069	0.432701	-0.210368	0.0169922	0.00937233	-0.00761983
CA5B					0.735038	0.647438	-0.0875994	0.585745	0.465271	-0.120474	0.886744	0.611948	-0.274796	0.309822	0.248463	-0.0613588	0.342724	0.28998	-0.0527439
CAB39L					0.883572	0.652476	-0.231095	0.63695	0.460646	-0.176304	0.730688	0.537129	-0.19356				0.0426432	0.0376537	-0.0049895
CABLES1		0.0754391	0.0756781	0.000238972	0.0946176	0.0852387	-0.00937897				0.467937	0.353189	-0.114748	0.158994	0.140093	-0.0189014
CABYR	up	0.0507224	0.0544722	0.00374976	0.900433	0.64109	-0.259344	0.455413	0.36399	-0.0914236	0.807534	0.622085	-0.18545	0.861301	0.600041	-0.26126	0.154645	0.111327	-0.0433177
CACNA1D		0.645815	0.513404	-0.132412	0.297724	0.226473	-0.0712506				0.406474	0.323125	-0.0833486	0.226631	0.206701	-0.0199301	0.235567	0.18318	-0.0523868
CADM3					0.201414	0.166846	-0.034568	0.264809	0.219774	-0.0450349	0.354062	0.28284	-0.0712224	0.0853343	0.0792778	-0.00605651	0.0854623	0.0750019	-0.0104604
CADPS2					0.774667	0.618484	-0.156183	0.0736968	0.0760746	0.00237775	0.611107	0.457685	-0.153422	0.0605802	0.0611205	0.000540256	0.0430215	0.0401426	-0.00287889
CALB2											0.495199	0.369166	-0.126033	0.149475	0.129325	-0.0201507	0.00676349	0.0095245	0.00276101
CAPS					0.833507	0.656404	-0.177103	0.639305	0.529448	-0.109858	0.924491	0.696386	-0.228104	0.85651	0.640079	-0.216431	0.531122	0.425883	-0.105239
CARS					0.851188	0.76026	-0.090928	0.0392865	0.042927	0.0036405	0.631746	0.464193	-0.167553	0.0657711	0.0585077	-0.00726343	0.0550938	0.0545168	-0.000577012
CASP14											0.151875	0.133034	-0.0188408	0.0672628	0.0663753	-0.000887568	0.0988896	0.109392	0.0105027
CASP2		0.0208039	0.0186503	-0.00215358	0.810456	0.510573	-0.299883				0.612811	0.41933	-0.19348				0.912479	0.423659	-0.48882
CAT		0.0413815	0.0393824	-0.00199917	0.976806	0.752712	-0.224094				0.275545	0.220081	-0.0554645	0.05074	0.0505673	-0.000172668	0.0574309	0.0575106	7.96647e-05
CATSPER2								0.940425	0.77252	-0.167905	0.745026	0.614651	-0.130375	0.664713	0.561858	-0.102855	0.960515	0.850804	-0.109711
CATSPERB								0.441796	0.37054	-0.0712553	0.182363	0.151103	-0.0312604	0.411082	0.30009	-0.110992	0.284316	0.220463	-0.0638531
CAV1		0.0687048	0.0629817	-0.00572318	0.77508	0.600126	-0.174954	0.0564283	0.0510807	-0.00534766	0.363502	0.291372	-0.0721308	0.191723	0.162839	-0.0288848	0.0565198	0.0594857	0.002966
CAV2		0.0112053	0.0086091	-0.00259619	0.9281	0.671326	-0.256774	0.0231253	0.0187077	-0.00441759	0.226035	0.188275	-0.0377599	0.560979	0.420675	-0.140304	0.0627281	0.0655188	0.00279079
CCDC102B								0.405708	0.295026	-0.110682	0.595294	0.464049	-0.131244	0.188429	0.14079	-0.0476396	0.0509939	0.0492672	-0.0017267
CCDC144A		0.706896	0.584369	-0.122527							0.544473	0.440613	-0.10386	0.849208	0.653038	-0.19617	0.653574	0.561044	-0.0925305
CCDC152	up				0.281771	0.220402	-0.0613689	0.616341	0.463376	-0.152965	0.0450754	0.0459899	0.000914417	0.760445	0.602529	-0.157916	0.840605	0.650769	-0.189836
CCDC73	up							0.801674	0.574391	-0.227284	0.901923	0.68235	-0.219572	0.709648	0.524657	-0.184992	0.681801	0.504273	-0.177528
CCDC80		0.0598259	0.0639603	0.0041344	0.0664894	0.0858018	0.0193124	0.0569124	0.055291	-0.00162134	0.896876	0.672585	-0.224291	0.624695	0.464083	-0.160612
CCDC84		0.00585273	0.00569154	-0.00016119							0.284787	0.226472	-0.058315	0.0633746	0.0588695	-0.0045051	0.0260742	0.024121	-0.00195323
CCL20	up	0.923655	0.738292	-0.185363							0.871299	0.584489	-0.28681	0.90667	0.728002	-0.178668	0.786857	0.59737	-0.189487
CCL28								0.154874	0.130007	-0.0248668	0.156804	0.122537	-0.0342663	0.612722	0.475458	-0.137264	0.112441	0.0860887	-0.0263519
CCNA1		0.0811515	0.0801939	-0.000957585	0.832784	0.596056	-0.236728	0.27545	0.219819	-0.0556314	0.787032	0.552427	-0.234605	0.502979	0.38769	-0.115289
CCNB1IP1					0.752501	0.591422	-0.161079	0.956313	0.700915	-0.255399	0.902675	0.635894	-0.266781	0.883275	0.641989	-0.241286	0.0357978	0.0427848	0.006987
CCNE1		0.443726	0.391221	-0.0525047	0.885904	0.716984	-0.16892				0.891636	0.656053	-0.235583	0.153015	0.12066	-0.0323547	0.0848688	0.0656657	-0.0192031
CCNE2		0.0283716	0.0291391	0.000767517				0.116916	0.113592	-0.0033245	0.531195	0.378113	-0.153081	0.0606734	0.0623693	0.00169599	0.0422975	0.0361373	-0.00616021
CCNYL1		0.087873	0.0896884	0.00181534							0.501933	0.396386	-0.105547	0.0620145	0.0616501	-0.000364382	0.0531852	0.0532983	0.000113098
CCR1		0.376982	0.279763	-0.0972192	0.861618	0.640211	-0.221407	0.715069	0.556833	-0.158236	0.85321	0.751525	-0.101685	0.454822	0.327886	-0.126936	0.100039	0.0833237	-0.0167153
CCR3		0.900104	0.665648	-0.234455	0.400441	0.299006	-0.101435	0.666725	0.491575	-0.17515	0.903674	0.636407	-0.267268	0.499104	0.377412	-0.121692
CCRN4L	up	0.0360715	0.0410156	0.0049441	0.913952	0.731182	-0.182771				0.414983	0.318028	-0.0969554	0.0975017	0.0995834	0.00208167	0.033804	0.0335769	-0.000227056
CD109	up							0.769687	0.546296	-0.22339	0.488913	0.363243	-0.12567	0.803366	0.594826	-0.20854	0.520999	0.385024	-0.135975
CD180		0.803148	0.581383	-0.221765	0.281821	0.229964	-0.0518567				0.709325	0.571209	-0.138115	0.775556	0.539561	-0.235995	0.406054	0.286336	-0.119718
CD24	up													0.284204	0.115263	-0.168941
CD274								0.086568	0.0863088	-0.000259223				0.0895262	0.0831184	-0.00640782	0.0311365	0.0383861	0.00724962
CD55		0.0589232	0.058804	-0.000119248	0.792635	0.582519	-0.210116				0.257145	0.204442	-0.0527033	0.185373	0.141798	-0.0435752	0.0472724	0.0478611	0.000588677
CD68		0.0799509	0.0655229	-0.014428	0.938939	0.634897	-0.304042				0.909704	0.711926	-0.197777	0.0811344	0.0686716	-0.0124627	0.0586152	0.0647461	0.00613091
CD9		0.0307704	0.0337626	0.00299222							0.555607	0.419217	-0.13639	0.0725617	0.0657779	-0.00678372	0.0453733	0.0441756	-0.00119776
CDA	up	0.382888	0.304529	-0.0783587	0.83774	0.578269	-0.259471				0.514917	0.382575	-0.132343	0.498379	0.377402	-0.120977	0.37805	0.310081	-0.0679689
CDC14A					0.84307	0.671305	-0.171766	0.0717917	0.0732197	0.00142805	0.632383	0.450949	-0.181434	0.073325	0.0688537	-0.00447138	0.0481866	0.0456357	-0.00255091
CDC25A		0.0836978	0.0904415	0.00674369	0.698073	0.53199	-0.166083	0.058755	0.0574578	-0.00129719	0.86147	0.670559	-0.190911	0.468435	0.369874	-0.0985617	0.051758	0.0441491	-0.00760892
CDC42EP1					0.819687	0.662974	-0.156713	0.347389	0.264676	-0.0827134	0.851238	0.693825	-0.157413	0.335973	0.282644	-0.0533287	0.0989604	0.109923	0.0109629
CDC6		0.0103228	0.00856017	-0.00176258	0.417436	0.321226	-0.0962107	0.0599228	0.0587619	-0.00116089	0.602451	0.487989	-0.114462	0.0963007	0.0828476	-0.013453	0.032891	0.0345293	0.00163828
CDH10		0.089312	0.0671668	-0.0221452				0.247959	0.190368	-0.0575908	0.156628	0.124219	-0.0324082	0.21627	0.156476	-0.0597939	0.134132	0.116872	-0.0172599
CDH12					0.329105	0.261363	-0.067742	0.26504	0.211521	-0.0535189	0.419933	0.305742	-0.114191	0.0615831	0.0646066	0.0030235
CDH13	up	0.794709	0.591308	-0.203401	0.173943	0.144118	-0.0298247				0.339893	0.25794	-0.0819528	0.738144	0.501571	-0.236573	0.941652	0.60615	-0.335501
CDH18		0.245501	0.184972	-0.0605291	0.0839317	0.0703865	-0.0135452	0.198234	0.14655	-0.0516842	0.151693	0.11508	-0.0366137	0.182874	0.14832	-0.0345537	0.258552	0.190601	-0.0679508
CDH2	up	0.888678	0.587991	-0.300687							0.75763	0.569188	-0.188443	0.950773	0.633418	-0.317355	0.968158	0.629587	-0.338571
CDH3		0.0807929	0.0692426	-0.0115503	0.87973	0.568914	-0.310816				0.605519	0.470335	-0.135184	0.529168	0.412375	-0.116793	0.900547	0.643379	-0.257168
CDH4	down				0.853107	0.644875	-0.208232				0.655912	0.507074	-0.148838	0.495049	0.430441	-0.0646084
CDH5					0.696155	0.505766	-0.190389	0.652146	0.498871	-0.153275	0.662843	0.519555	-0.143288	0.510303	0.403727	-0.106577	0.861816	0.674887	-0.186929
CDH6					0.649469	0.4708	-0.178669	0.601973	0.447381	-0.154592	0.653332	0.484166	-0.169166	0.353592	0.253812	-0.0997796	0.336745	0.25498	-0.0817652
CDK1								0.094803	0.0954164	0.00061342	0.857471	0.544337	-0.313134	0.506857	0.366315	-0.140542	0.0570581	0.0609818	0.00392369
CDK15					0.894425	0.56552	-0.328905	0.466951	0.340316	-0.126635	0.732895	0.571163	-0.161732	0.901531	0.762326	-0.139204	0.118021	0.0798439	-0.0381772
CDK17					0.916792	0.649691	-0.267101	0.264677	0.201989	-0.0626886	0.72572	0.606186	-0.119534	0.0462413	0.0469382	0.000696914	0.0814546	0.0831009	0.00164629
CDK2					0.214983	0.174692	-0.0402915	0.0864029	0.0886506	0.00224769	0.340694	0.273544	-0.0671497	0.42631	0.333015	-0.0932944	0.054748	0.0522478	-0.00250016
CDK6					0.860195	0.60734	-0.252855	0.0485176	0.0520957	0.00357802	0.688333	0.491393	-0.19694	0.109575	0.108513	-0.00106172	0.0480948	0.0493805	0.00128564
CDKAL1	down	0.0643013	0.0648871	0.000585882	0.901356	0.704499	-0.196857				0.821569	0.584543	-0.237026	0.399911	0.281913	-0.117998	0.0709607	0.065617	-0.00534362
CDKN2C		0.0622734	0.064301	0.0020276				0.0368672	0.0394632	0.00259604	0.856263	0.57928	-0.276983	0.0310905	0.0333856	0.00229506	0.0259394	0.0282244	0.00228496
CEBPG					0.904892	0.636747	-0.268146	0.324131	0.205804	-0.118327	0.975922	0.72457	-0.251352	0.367318	0.234942	-0.132375	0.00740869	0.00477476	-0.00263392
CELSR1		0.644894	0.477809	-0.167086	0.880757	0.571221	-0.309536				0.758653	0.590098	-0.168555	0.0438072	0.0603506	0.0165434	0.119892	0.114435	-0.0054569
CENPI		0.809	0.637571	-0.171429				0.883395	0.741508	-0.141887	0.783202	0.567448	-0.215755	0.0496064	0.0607351	0.0111288
CENPK								0.242549	0.192555	-0.0499943	0.896305	0.608999	-0.287306	0.0701153	0.0644264	-0.00568883	0.0090215	0.00523826	-0.00378324
CENPN								0.198389	0.161213	-0.0371758				0.446576	0.28029	-0.166287	0.0586952	0.0578195	-0.000875693
CEP70								0.321052	0.246408	-0.0746441	0.624616	0.435793	-0.188822	0.0654443	0.071009	0.0055647	0.0324184	0.0344338	0.00201537
CES1		0.379426	0.314409	-0.0650166							0.265981	0.233531	-0.0324501	0.0993741	0.0860649	-0.0133092
CFL2		0.059377	0.0535102	-0.00586686				0.100207	0.0999156	-0.000291379	0.0680855	0.0700332	0.00194772	0.476669	0.351654	-0.125015	0.0163263	0.0169799	0.00065368
CHAC1		0.063104	0.0632383	0.00013428	0.861299	0.635997	-0.225303				0.911047	0.705383	-0.205664	0.346268	0.265789	-0.0804788	0.0458398	0.0459023	6.24963e-05
CHAF1A		0.0497218	0.0523401	0.00261836	0.898224	0.698608	-0.199616				0.23973	0.201828	-0.0379015	0.0625124	0.0620638	-0.000448596	0.0675888	0.066383	-0.0012058
CHML		0.938385	0.645518	-0.292867	0.926044	0.655497	-0.270548							0.901498	0.703867	-0.197632
CHRNA5	up	0.0488045	0.0575785	0.00877397							0.301477	0.231769	-0.0697082	0.562019	0.420859	-0.14116	0.0235681	0.024584	0.00101589
CHRNA9					0.268131	0.20955	-0.0585816				0.609044	0.427642	-0.181402	0.356108	0.273803	-0.0823042	0.683544	0.513367	-0.170177
CIRBP		0.0494545	0.0499672	0.000512783							0.355828	0.301166	-0.0546622	0.574494	0.469347	-0.105147	0.0280319	0.0270412	-0.000990718
CITED2		0.0465293	0.050703	0.00417375	0.0640851	0.0580048	-0.00608022	0.0368758	0.0480121	0.0111363	0.0636977	0.0642077	0.000510001	0.0480608	0.0486607	0.00059991	0.0469184	0.047464	0.000545534
CITED4	up	0.329693	0.272722	-0.0569716	0.870159	0.689926	-0.180234	0.318124	0.286133	-0.0319907				0.205918	0.167527	-0.0383906	0.0460766	0.0430515	-0.00302514
CKB	up										0.472328	0.351719	-0.120609	0.73762	0.559344	-0.178277	0.243614	0.164951	-0.0786637
CKMT1A					0.242078	0.19012	-0.0519586				0.0673007	0.0537845	-0.0135162				0.105615	0.100582	-0.00503327
CLCA2					0.160451	0.120926	-0.0395247				0.160709	0.110243	-0.0504661	0.788658	0.595628	-0.193031
CLDN1	up	0.088326	0.0875504	-0.000775563	0.582067	0.41184	-0.170227	0.0753148	0.0609151	-0.0143996	0.626885	0.452711	-0.174174	0.290748	0.219194	-0.0715538	0.0431439	0.0397092	-0.00343466
CLDN16											0.833755	0.694602	-0.139153	0.914928	0.675769	-0.239159	0.766192	0.552337	-0.213855
CLDN6					0.461422	0.375795	-0.0856265	0.896518	0.738111	-0.158407				0.82461	0.656336	-0.168274	0.835285	0.640861	-0.194424
CLDN8		0.377288	0.308531	-0.0687569										0.162984	0.125283	-0.0377009	0.113463	0.0764582	-0.0370046
CLEC7A		0.293973	0.177111	-0.116863	0.432046	0.309875	-0.12217				0.437076	0.305591	-0.131485	0.268549	0.173895	-0.0946543	0.308255	0.212638	-0.0956171
CLGN		0.0644743	0.0613527	-0.0031216				0.175165	0.146796	-0.0283692	0.899457	0.603431	-0.296025	0.05473	0.055113	0.000382975	0.035197	0.0308066	-0.00439042
CLIP4		0.0186161	0.0169606	-0.00165542				0.357706	0.267631	-0.0900754	0.881418	0.645745	-0.235674	0.0387728	0.0403342	0.0015614	0.045294	0.0408141	-0.00447989
CLMN					0.447723	0.361485	-0.0862379				0.618462	0.470887	-0.147575	0.686533	0.498367	-0.188165
CLSPN								0.0334782	0.0296235	-0.00385473	0.32485	0.254153	-0.070697	0.0522992	0.0525926	0.00029343	0.0516557	0.0490833	-0.00257245
CLU	up	0.273834	0.211167	-0.0626675	0.0502179	0.0495819	-0.00063606				0.674953	0.524454	-0.150499	0.717366	0.509757	-0.207609	0.192354	0.162546	-0.0298076
CLYBL					0.818997	0.608768	-0.210229				0.657248	0.497518	-0.15973	0.0854052	0.0776557	-0.00774945	0.038057	0.0405408	0.00248377
CMTM3	up				0.897897	0.633001	-0.264896	0.758286	0.617551	-0.140734	0.0845499	0.0733494	-0.0112004	0.929234	0.764782	-0.164452
CMYA5					0.456469	0.348986	-0.107484				0.601308	0.441082	-0.160225	0.672951	0.561348	-0.111603	0.702183	0.573191	-0.128992
CNDP2		0.0450578	0.0427487	-0.00230905	0.794768	0.599973	-0.194796	0.0767836	0.0812534	0.00446979	0.877942	0.615338	-0.262604	0.117037	0.105004	-0.0120332	0.0385448	0.0317277	-0.00681709
CNKSR2		0.499476	0.415512	-0.0839643	0.853757	0.751129	-0.102628				0.427041	0.326004	-0.101036	0.294214	0.247269	-0.0469442
CNN1	up	0.662551	0.533001	-0.12955	0.764103	0.62431	-0.139794				0.89895	0.700506	-0.198444	0.827423	0.630988	-0.196435	0.401659	0.318543	-0.0831154
CNN3					0.903703	0.656741	-0.246962	0.0241113	0.0212021	-0.00290912	0.501181	0.391301	-0.109879	0.0742375	0.0682637	-0.00597374	0.0782436	0.0665589	-0.0116847
CNP					0.819857	0.602245	-0.217612				0.678044	0.483173	-0.194872	0.0777145	0.0722844	-0.00543015	0.0570344	0.0550061	-0.00202827
CNR1					0.91491	0.733965	-0.180945	0.358373	0.275152	-0.0832208	0.527447	0.423333	-0.104115	0.94527	0.68201	-0.26326	0.129243	0.121147	-0.00809648
CNTD2		0.0758454	0.0682186	-0.00762685	0.951398	0.753235	-0.198163				0.660723	0.492017	-0.168706	0.216995	0.185347	-0.0316475	0.19514	0.160884	-0.034256
CNTN3											0.0840018	0.0714107	-0.0125911	0.398821	0.363153	-0.0356681
COL12A1					0.844553	0.626123	-0.21843	0.27007	0.186246	-0.0838234	0.870793	0.603315	-0.267479	0.516635	0.347448	-0.169187	0.0612146	0.0598016	-0.00141308
COL14A1					0.408583	0.329235	-0.0793483	0.678003	0.510547	-0.167456	0.477968	0.356737	-0.121231	0.380317	0.317195	-0.0631225	0.976279	0.732156	-0.244123
COL5A2		0.755585	0.551106	-0.20448	0.802148	0.572883	-0.229265				0.544999	0.422609	-0.122391	0.655617	0.49149	-0.164127	0.897932	0.693376	-0.204557
COQ10A		0.0698466	0.0661125	-0.00373412	0.923108	0.642284	-0.280823				0.368611	0.276863	-0.091748	0.296977	0.245294	-0.0516837	0.0221278	0.0203038	-0.00182403
COX19					0.877512	0.659324	-0.218187	0.00706151	0.00365142	-0.00341009	0.515003	0.408655	-0.106348	0.443774	0.332116	-0.111658	0.0940813	0.0871435	-0.0069378
COX6B1		0.0528938	0.0584401	0.00554627				0.0577267	0.0474047	-0.010322	0.918779	0.657781	-0.260998	0.446965	0.420049	-0.0269169	0.0450422	0.0517236	0.00668144
COX7A1	up							0.930861	0.659786	-0.271075	0.878567	0.695674	-0.182893	0.932917	0.730348	-0.202569	0.917944	0.664948	-0.252997
COX7B2		0.90904	0.666755	-0.242285				0.472683	0.364936	-0.107746				0.294949	0.202795	-0.0921545	0.592251	0.421978	-0.170273
CPA4	up	0.0484094	0.0481518	-0.000257663	0.811664	0.592829	-0.218835				0.768122	0.553451	-0.21467	0.914638	0.639234	-0.275404
CPAMD8					0.73707	0.560665	-0.176405				0.572076	0.440894	-0.131182	0.793052	0.646269	-0.146784	0.0321	0.0363973	0.00429732
CPM	up				0.793159	0.68904	-0.104119	0.468627	0.377136	-0.091491	0.574647	0.420102	-0.154544	0.867493	0.636854	-0.230639
CPT1A					0.931419	0.702095	-0.229324	0.434048	0.341477	-0.0925708	0.921259	0.669986	-0.251273	0.690966	0.539365	-0.151601	0.333612	0.241532	-0.0920802
CRAT		0.0859726	0.0860297	5.716e-05	0.86273	0.663359	-0.199371				0.725899	0.503908	-0.221991
CREB3L2		0.0379114	0.0441938	0.00628235	0.894883	0.698691	-0.196191				0.720575	0.494604	-0.225972	0.0762444	0.082036	0.00579153	0.0783235	0.0734795	-0.00484394
CREB5		0.561945	0.410905	-0.15104	0.748265	0.51721	-0.231056	0.472203	0.362432	-0.109771	0.490272	0.372811	-0.117461	0.320018	0.227543	-0.0924747	0.141266	0.114017	-0.0272492
CRISP2								0.403677	0.319472	-0.0842049	0.270108	0.196113	-0.0739947	0.195517	0.140367	-0.0551496	0.552744	0.423181	-0.129564
CRISP3								0.290542	0.221852	-0.0686905	0.283948	0.219565	-0.0643826
CRISPLD1		0.145875	0.11289	-0.0329844	0.620824	0.38267	-0.238154	0.0729281	0.0714093	-0.00151878	0.849682	0.607384	-0.242297	0.824087	0.618922	-0.205164	0.100961	0.0940516	-0.00690926
CRISPLD2		0.0572169	0.0546577	-0.00255918	0.693366	0.540878	-0.152488	0.615086	0.48326	-0.131826	0.811771	0.64318	-0.16859	0.609222	0.469324	-0.139898	0.0604918	0.0559235	-0.00456827
CRY1		0.0194598	0.0182862	-0.00117364							0.63503	0.45334	-0.181691	0.46128	0.295239	-0.166041	0.0282039	0.0318597	0.0036558
CRYGC		0.917537	0.682938	-0.234599							0.784675	0.587081	-0.197593	0.663198	0.470203	-0.192995	0.745157	0.543803	-0.201354
CSGALNACT2		0.0182888	0.0204384	0.00214956	0.840431	0.608619	-0.231812	0.254808	0.167631	-0.0871775	0.626649	0.422553	-0.204096	0.569626	0.410729	-0.158897	0.0436225	0.0433526	-0.000269906
CST4	up	0.906074	0.579446	-0.326628	0.305249	0.236569	-0.0686808				0.75811	0.483844	-0.274266	0.293099	0.215046	-0.0780528
CST6		0.615792	0.542498	-0.0732945	0.68743	0.540601	-0.146829				0.749169	0.625073	-0.124096	0.566618	0.444284	-0.122334	0.28018	0.246073	-0.0341072
CSTA		0.767876	0.547601	-0.220275							0.800011	0.619867	-0.180144				0.24432	0.185325	-0.058995
CTAGE1	up	0.743363	0.530237	-0.213127	0.643439	0.546173	-0.0972656							0.443006	0.34845	-0.094556	0.928372	0.727601	-0.200771
CTBS		0.106886	0.102811	-0.004075							0.244184	0.188125	-0.0560592	0.369609	0.267145	-0.102464	0.0712099	0.0672185	-0.00399145
CTCFL					0.59672	0.438769	-0.157951	0.577304	0.449829	-0.127475	0.450647	0.352547	-0.0980995
CTGF	up	0.0499333	0.0474477	-0.00248559	0.194068	0.135489	-0.0585786				0.132647	0.113467	-0.0191801	0.060756	0.0576503	-0.00310566	0.0340018	0.0445423	0.0105405
CTH		0.076478	0.080058	0.00358							0.487134	0.41528	-0.0718542	0.0531778	0.0544165	0.00123866	0.0376083	0.0359076	-0.00170065
CTNNAL1											0.360316	0.267134	-0.0931816	0.325491	0.251355	-0.0741356	0.03796	0.0315974	-0.00636255
CTSE	up				0.590443	0.443246	-0.147197				0.444556	0.386664	-0.0578922	0.624377	0.502109	-0.122268	0.668677	0.523796	-0.144881
CTSW	up	0.879381	0.718826	-0.160556							0.760787	0.592979	-0.167808	0.76981	0.573271	-0.196539	0.844039	0.698267	-0.145771
CUBN		0.781015	0.591501	-0.189514	0.797502	0.602574	-0.194929				0.564941	0.426249	-0.138692	0.608571	0.468597	-0.139975	0.944139	0.788201	-0.155938
CUL4B		0.82586	0.646813	-0.179048	0.887561	0.66187	-0.225691				0.0459558	0.0414471	-0.0045087	0.803538	0.642127	-0.161411	0.398829	0.352458	-0.0463707
CXADRP3	up										0.520358	0.455488	-0.0648701	0.571365	0.427327	-0.144039
CXCL10	up				0.0978166	0.0885459	-0.00927065							0.815492	0.575606	-0.239887	0.577005	0.409024	-0.167981
CXCL2		0.0481578	0.0475124	-0.000645462	0.247354	0.162164	-0.0851902				0.0542431	0.046852	-0.00739109	0.171564	0.132608	-0.0389564	0.0652919	0.0661277	0.000835841
CXCL5	up	0.866325	0.651445	-0.214879	0.834003	0.718919	-0.115083							0.562642	0.454661	-0.107981	0.885586	0.653508	-0.232078
CYB5D1	up	0.0662716	0.0550015	-0.0112701	0.673128	0.457048	-0.216081				0.904978	0.633116	-0.271862	0.105268	0.0992458	-0.0060225	0.0143428	0.0144385	9.57493e-05
CYGB	up	0.201922	0.168186	-0.0337354	0.459045	0.355936	-0.103109				0.867033	0.652894	-0.214139	0.73511	0.558817	-0.176293	0.314208	0.269372	-0.0448353
CYLD		0.0256852	0.0233328	-0.00235237	0.903818	0.661101	-0.242717	0.288714	0.224536	-0.0641783	0.919269	0.611756	-0.307513	0.0510715	0.0528688	0.00179734	0.0599005	0.058522	-0.00137842
CYP1A1	up				0.692271	0.600906	-0.0913656	0.809274	0.593499	-0.215775	0.764825	0.570344	-0.194481	0.440853	0.350571	-0.0902815	0.0889773	0.0806842	-0.0082932
CYP1B1		0.128758	0.113519	-0.0152399	0.786829	0.578677	-0.208153	0.0342659	0.0244022	-0.00986372	0.391958	0.29439	-0.097568	0.0998986	0.0821105	-0.0177881	0.0661275	0.0555249	-0.0106026
CYP24A1	up	0.457945	0.443555	-0.0143905	0.49824	0.352934	-0.145306	0.581028	0.526743	-0.0542854	0.60821	0.463208	-0.145001	0.109096	0.0765316	-0.0325639	0.366544	0.300431	-0.0661133
CYP27A1					0.76703	0.645769	-0.12126	0.0898512	0.0865239	-0.00332728	0.505858	0.394995	-0.110863	0.428921	0.358152	-0.0707688	0.0845879	0.103703	0.0191152
CYP2R1		0.0977406	0.0993628	0.00162217							0.17607	0.128165	-0.0479055	0.037944	0.0382705	0.000326484	0.0708121	0.0677112	-0.00310094
CYP4B1		0.166639	0.132041	-0.0345979	0.0312799	0.025765	-0.00551489				0.192977	0.162449	-0.0305275	0.136957	0.125026	-0.0119317	0.125399	0.132323	0.00692467
CYP4X1		0.276519	0.214558	-0.0619618							0.220055	0.175652	-0.0444029	0.452129	0.35953	-0.0925993	0.0583128	0.0487378	-0.00957504
CYP4Z1											0.427791	0.337952	-0.089839
CYP4Z2P											0.163105	0.103418	-0.0596865	0.29477	0.234654	-0.0601158
CYR61		0.00267206	0.00502758	0.00235552	0.0663859	0.061054	-0.00533194				0.0599779	0.0633533	0.00337534	0.0752916	0.0686291	-0.00666244	0.0719007	0.07976	0.00785938
DAB2		0.170451	0.162056	-0.00839428	0.52303	0.369687	-0.153344	0.642122	0.471736	-0.170386	0.752558	0.538597	-0.213961	0.574321	0.355605	-0.218716	0.197941	0.143886	-0.0540557
DAG1					0.917224	0.670266	-0.246958	0.306637	0.245543	-0.061094	0.900942	0.721871	-0.179071	0.0693083	0.0676859	-0.00162244	0.0311608	0.029263	-0.00189776
DAPK1								0.138895	0.129138	-0.00975724	0.59602	0.441873	-0.154147	0.226666	0.168509	-0.058157	0.0360375	0.044394	0.00835655
DAPP1		0.255379	0.1859	-0.0694785	0.169224	0.115998	-0.0532265				0.868056	0.667156	-0.2009	0.307055	0.253399	-0.0536556	0.478618	0.358808	-0.119809
DAZL	up	0.929504	0.734263	-0.19524							0.712735	0.567096	-0.145639	0.769454	0.562288	-0.207166	0.948194	0.708389	-0.239805
DCAF4L1	up	0.737055	0.58976	-0.147295				0.971552	0.777126	-0.194426				0.884995	0.741546	-0.143448	0.864707	0.652225	-0.212482
DCAF4L2		0.603939	0.463343	-0.140596	0.239209	0.181782	-0.0574266	0.85224	0.61554	-0.236701							0.812126	0.600557	-0.211569
DCAKD		0.052639	0.0459131	-0.00672592	0.896746	0.679852	-0.216894	0.480836	0.358358	-0.122478	0.931829	0.720246	-0.211584	0.205653	0.166212	-0.039441	0.0528899	0.0545365	0.00164656
DCLK1	up	0.0758145	0.043804	-0.0320105				0.186787	0.147541	-0.0392455	0.723042	0.553353	-0.169689	0.505884	0.379938	-0.125946	0.167322	0.140018	-0.0273036
DCLK2		0.0407369	0.0344244	-0.00631242	0.874046	0.692655	-0.181391				0.768656	0.571016	-0.19764	0.337062	0.259607	-0.0774546	0.0164333	0.0152706	-0.00116268
DDAH1		0.035315	0.0365087	0.00119372	0.434211	0.328412	-0.1058	0.461637	0.339475	-0.122162	0.586329	0.440688	-0.14564	0.165462	0.138354	-0.0271082	0.0489728	0.0504614	0.0014886
DDIT3		0.0866512	0.0987055	0.0120543	0.842496	0.611125	-0.231371	0.0809974	0.0761606	-0.00483684				0.121627	0.108777	-0.0128497	0.0413529	0.0408679	-0.000484999
DDIT4	down	0.0857547	0.0921105	0.00635576	0.249061	0.190653	-0.0584082	0.0727032	0.0672191	-0.00548408	0.0950608	0.0921508	-0.00291005	0.0809124	0.0779083	-0.00300406	0.0672395	0.0646002	-0.00263929
DDX23								0.247996	0.197928	-0.0500681	0.856033	0.676402	-0.179631	0.0622871	0.0632459	0.00095873	0.0724909	0.0721025	-0.000388384
DDX4	up							0.989719	0.737669	-0.25205	0.515839	0.392532	-0.123307	0.783353	0.597579	-0.185774	0.770182	0.613037	-0.157144
DDX43	up	0.913958	0.680505	-0.233452	0.916561	0.710589	-0.205972							0.755663	0.602235	-0.153428	0.791296	0.652798	-0.138498
DDX47		0.0083169	0.00154354	-0.00677336	0.913774	0.610376	-0.303398				0.478651	0.396207	-0.0824437	0.118687	0.0910614	-0.0276253	0.0446311	0.0417118	-0.00291924
DDX50		0.0781093	0.0740137	-0.00409558							0.47512	0.348968	-0.126151	0.250568	0.175096	-0.0754719	0.0562658	0.0549485	-0.00131729
DDX53		0.809202	0.618963	-0.19024										0.339569	0.2825	-0.0570694	0.385279	0.294417	-0.090862
DDX60L								0.402469	0.310511	-0.0919581	0.454078	0.359036	-0.0950425	0.328715	0.24028	-0.0884354	0.0565046	0.0576139	0.00110932
DENND2C		0.069012	0.0641227	-0.00488934				0.359199	0.257392	-0.101807	0.902195	0.784401	-0.117794	0.0533298	0.0518373	-0.00149259	0.0455816	0.0438321	-0.00174954
DEPDC7	up	0.486474	0.461726	-0.0247473				0.429666	0.395749	-0.0339172	0.69552	0.49738	-0.198139	0.466853	0.301322	-0.165531	0.422911	0.379785	-0.0431264
DFNA5		0.0515227	0.0453191	-0.00620358	0.923608	0.666339	-0.257269	0.472143	0.367084	-0.105059	0.75288	0.526111	-0.226769	0.6288	0.442031	-0.186769
DGKE	up	0.296289	0.256018	-0.0402709	0.795866	0.646888	-0.148978	0.923934	0.642143	-0.28179	0.927573	0.671049	-0.256524	0.0980623	0.0866649	-0.0113974
DHCR24		0.0359203	0.0353157	-0.000604562	0.695866	0.511063	-0.184803				0.554317	0.407092	-0.147225	0.08694	0.0809403	-0.00599973	0.0408672	0.0512545	0.0103874
DIAPH2	down	0.103547	0.10022	-0.00332663	0.905361	0.701167	-0.204194	0.0503425	0.0549046	0.00456216	0.68854	0.510131	-0.178408	0.477835	0.396441	-0.0813946	0.0832142	0.0810651	-0.00214905
DIO2		0.828984	0.605803	-0.22318	0.138945	0.112235	-0.02671				0.912052	0.67431	-0.237742	0.499049	0.365453	-0.133595
DIRAS3		0.501144	0.451843	-0.0493009	0.841355	0.61417	-0.227185	0.488415	0.406067	-0.0823482	0.811325	0.580298	-0.231027	0.830141	0.615056	-0.215085	0.522488	0.434403	-0.0880856
DIS3L		0.0892598	0.0887958	-0.000463973	0.920153	0.680081	-0.240072				0.641977	0.45691	-0.185067	0.656453	0.471447	-0.185006	0.0663494	0.0680794	0.00173006
DKK1		0.0732243	0.0728781	-0.000346213				0.0782119	0.0776019	-0.000610017	0.0467865	0.0490401	0.00225367	0.0893477	0.0788697	-0.0104779	0.093881	0.0874887	-0.00639236
DLGAP5								0.0748696	0.0669353	-0.00793428	0.845987	0.621769	-0.224218	0.249233	0.201975	-0.0472577	0.0491764	0.0437661	-0.0054103
DMC1		0.00601129	0.00964526	0.00363398				0.848063	0.64241	-0.205653	0.780219	0.62939	-0.15083	0.086176	0.0617582	-0.0244178
DMXL2								0.0652786	0.0707232	0.00544456	0.389286	0.278339	-0.110947	0.0395614	0.0383642	-0.00119721	0.0678658	0.0675533	-0.00031253
DNA2		0.0840642	0.0815146	-0.00254958							0.61956	0.473661	-0.1459	0.874881	0.657954	-0.216927	0.45148	0.372842	-0.0786382
DNAH11	up	0.0690634	0.0570723	-0.0119911							0.513159	0.39514	-0.118019	0.330507	0.225636	-0.10487	0.0311223	0.0340791	0.0029568
DNAJA1								0.0158505	0.00825113	-0.00759935	0.0730429	0.0597146	-0.0133283	0.0676874	0.065983	-0.00170442	0.109596	0.102613	-0.00698279
DNAJA4	up							0.936242	0.695894	-0.240347	0.421563	0.348317	-0.0732461	0.534797	0.418968	-0.115829	0.206624	0.170498	-0.0361262
DNAJB1		0.0834523	0.0860615	0.00260922	0.696305	0.488412	-0.207892	0.18697	0.197798	0.0108285	0.270398	0.232726	-0.0376714	0.505079	0.39341	-0.111669	0.0242329	0.0239998	-0.000233105
DNAJB4		0.0418688	0.0388174	-0.00305139							0.905628	0.591907	-0.313721				0.0545325	0.0550584	0.000525965
DNAJC13		0.0707887	0.0720325	0.00124382	0.893948	0.628201	-0.265746	0.352135	0.28879	-0.0633449	0.909384	0.658969	-0.250414	0.206855	0.160963	-0.0458915	0.0441134	0.0440758	-3.75328e-05
DNMT3B		0.0077591	0.00717489	-0.000584211	0.922383	0.697561	-0.224822	0.560726	0.409974	-0.150752	0.931844	0.746545	-0.185299	0.220105	0.180841	-0.0392633	0.0225507	0.0128165	-0.00973425
DOCK1	down										0.764673	0.5676	-0.197074	0.135882	0.1068	-0.0290819	0.0341155	0.0325342	-0.00158122
DOCK11								0.0184625	0.0155099	-0.00295265	0.424313	0.338823	-0.0854897	0.70552	0.554686	-0.150834
DONSON								0.0116602	0.00904102	-0.00261918	0.33103	0.260944	-0.0700857	0.230017	0.176919	-0.053098	0.0338977	0.0365642	0.00266653
DPCR1					0.603185	0.471477	-0.131708				0.360779	0.283458	-0.0773204	0.383221	0.325905	-0.0573166	0.505425	0.420682	-0.0847426
DPP4	up	0.164745	0.125895	-0.0388503	0.75209	0.478365	-0.273725				0.317849	0.254195	-0.0636541	0.521431	0.374151	-0.147279	0.484418	0.335383	-0.149035
DRG1		0.395312	0.363618	-0.031694							0.565079	0.435876	-0.129203	0.331992	0.267428	-0.064564	0.0338038	0.0298789	-0.0039249
DSCC1		0.102027	0.0841792	-0.0178479							0.409528	0.276475	-0.133053	0.53605	0.377579	-0.15847	0.00923289	0.0089591	-0.00027379
DSG3		0.456605	0.335547	-0.121058										0.910653	0.789555	-0.121099	0.867037	0.632505	-0.234532
DSP		0.0158671	0.0154336	-0.000433496	0.832556	0.566238	-0.266319				0.527543	0.408266	-0.119277	0.200985	0.147583	-0.0534016	0.102492	0.0981736	-0.00431835
DUSP1	up	0.0906173	0.0828716	-0.00774571	0.109094	0.0950888	-0.0140048	0.0130139	0.0101382	-0.0028757	0.166383	0.140747	-0.0256357	0.0708911	0.0705913	-0.000299723	0.0242445	0.0142049	-0.0100396
DUSP14					0.883403	0.67165	-0.211753	0.564021	0.424427	-0.139594	0.91337	0.61081	-0.30256	0.0644849	0.0638893	-0.000595656	0.0460942	0.0484381	0.00234388
DUSP5		0.0175724	0.0224601	0.00488775	0.514393	0.391668	-0.122725	0.00804132	0.00812232	8.1004e-05	0.219136	0.164494	-0.054642	0.289145	0.231022	-0.0581232	0.0387025	0.0373031	-0.00139944
DUSP6		0.00370152	0.00642619	0.00272466	0.105879	0.0937657	-0.0121136	0.0731097	0.071331	-0.00177862	0.0536803	0.0554724	0.00179217	0.0674964	0.0689253	0.00142893	0.0517997	0.0504166	-0.00138312
DYM					0.936567	0.728061	-0.208506	0.472392	0.318589	-0.153803	0.913246	0.73752	-0.175726	0.513213	0.406177	-0.107036	0.0511491	0.0469573	-0.00419176
DYNC2H1	up	0.154419	0.124778	-0.029641							0.632568	0.421136	-0.211432	0.122996	0.0886079	-0.0343881	0.0298237	0.0277962	-0.00202756
E2F7					0.927977	0.694769	-0.233208	0.078368	0.0824198	0.00405185	0.438309	0.316232	-0.122077	0.102002	0.106035	0.00403283	0.0589146	0.0590989	0.000184275
E2F8		0.0840651	0.0793932	-0.00467194				0.0669925	0.0492177	-0.0177748	0.928304	0.633169	-0.295135	0.0643896	0.0526133	-0.0117763	0.0517723	0.0488319	-0.00294045
ECSCR	up	0.817999	0.600184	-0.217815							0.910167	0.709705	-0.200462	0.878919	0.664916	-0.214003	0.788919	0.615753	-0.173166
EFEMP2	up	0.319846	0.269015	-0.050831	0.888229	0.645517	-0.242713	0.653456	0.511128	-0.142328	0.724874	0.572409	-0.152464	0.0857009	0.0840693	-0.00163163	0.154593	0.127569	-0.0270246
EFNB2		0.0621935	0.0640226	0.00182912	0.929716	0.743249	-0.186467				0.591627	0.427189	-0.164438	0.0570227	0.0541535	-0.00286916	0.0677103	0.0626514	-0.00505887
EGFR					0.904163	0.683766	-0.220397	0.0448955	0.0479969	0.0031014	0.786504	0.558556	-0.227948	0.0605685	0.0580996	-0.00246884
EGR1	up				0.885874	0.654776	-0.231098	0.058055	0.0504945	-0.00756046	0.868896	0.708437	-0.16046	0.0852917	0.0929998	0.00770811	0.0435796	0.0434127	-0.00016688
EHF					0.908421	0.695984	-0.212437	0.587341	0.423196	-0.164145	0.502011	0.373205	-0.128807	0.536089	0.408777	-0.127312
EHMT1					0.932142	0.62623	-0.305912				0.887446	0.659272	-0.228175
EIF4A3		0.0980371	0.103198	0.00516111				0.0126504	0.0185163	0.0058659	0.907689	0.661103	-0.246586	0.213016	0.149771	-0.063245	0.0511208	0.0574589	0.00633811
EIF4EBP1		0.0115468	0.00618651	-0.00536025							0.620772	0.466374	-0.154399	0.295155	0.21889	-0.0762652	0.0278093	0.0283248	0.00051548
EIF4EBP2					0.90995	0.672798	-0.237152	0.040376	0.0361198	-0.00425614	0.405789	0.306787	-0.0990015	0.343212	0.261748	-0.0814642	0.0376303	0.0362838	-0.00134653
EIF5A2		0.0887402	0.0850153	-0.00372485	0.868918	0.639807	-0.229111	0.10926	0.0916606	-0.017599	0.752869	0.524211	-0.228658	0.895473	0.634648	-0.260825	0.0590938	0.0524685	-0.00662536
ELAVL2								0.227862	0.150055	-0.0778066	0.210954	0.052411	-0.158543	0.250003	0.248951	-0.00105183	0.0980787	0.0581132	-0.0399656
ELF5		0.771	0.570159	-0.200841				0.626777	0.472645	-0.154132	0.562424	0.461285	-0.101139	0.915214	0.690971	-0.224243	0.748882	0.56116	-0.187722
ELL2		0.117332	0.109478	-0.00785382							0.610614	0.461793	-0.148822	0.352077	0.238171	-0.113906	0.0520575	0.0620947	0.0100372
ELL3		0.0631591	0.0543005	-0.00885861				0.0483978	0.0545411	0.00614331	0.594567	0.46626	-0.128307	0.0750477	0.0792913	0.00424354	0.051105	0.0469437	-0.00416126
ELOVL2	up				0.478062	0.376928	-0.101134	0.96522	0.606618	-0.358602	0.802387	0.589311	-0.213077	0.880904	0.60699	-0.273914
ELOVL4	up	0.93962	0.658986	-0.280634				0.729123	0.611056	-0.118067	0.677519	0.485928	-0.191591	0.851864	0.579783	-0.272081	0.957198	0.638763	-0.318435
ELOVL7	up				0.648343	0.520251	-0.128092	0.273014	0.22019	-0.0528234	0.579622	0.392957	-0.186665	0.821594	0.574605	-0.246988
ELP4		0.0351264	0.0330533	-0.00207309							0.573043	0.443785	-0.129258				0.026264	0.0252647	-0.000999336
ELTD1	up							0.969004	0.766788	-0.202216	0.716376	0.540103	-0.176273	0.612529	0.41639	-0.196139	0.632905	0.446866	-0.186039
EMP3		0.0360868	0.0339379	-0.00214883	0.965819	0.627618	-0.338201	0.0868736	0.0718662	-0.0150074	0.787383	0.606119	-0.181264	0.338934	0.297489	-0.0414451
EMX2		0.660546	0.489831	-0.170716	0.410828	0.310953	-0.099875				0.551937	0.444375	-0.107562	0.466373	0.371467	-0.0949062	0.871528	0.671989	-0.19954
ENDOD1		0.040121	0.0346043	-0.00551672	0.870796	0.664928	-0.205867				0.213193	0.160102	-0.0530913	0.399157	0.294249	-0.104907	0.0344375	0.0241078	-0.0103297
ENG	up	0.781355	0.643338	-0.138016				0.453048	0.403522	-0.0495262	0.668532	0.547808	-0.120724	0.819041	0.58281	-0.236231
ENKUR					0.914995	0.712159	-0.202837	0.0891719	0.0975387	0.00836679	0.58648	0.478092	-0.108388	0.0534919	0.0513424	-0.00214942
ENO2		0.294738	0.304732	0.00999348	0.917111	0.663899	-0.253212	0.12215	0.103832	-0.0183181							0.0579394	0.0531047	-0.00483475
ENPP2		0.391245	0.262481	-0.128764							0.455712	0.361194	-0.0945181	0.319091	0.222335	-0.0967553	0.141745	0.114311	-0.0274337
ENTPD5					0.870257	0.529233	-0.341024	0.250575	0.193619	-0.0569562	0.786826	0.635167	-0.151658
EPGN		0.882287	0.598235	-0.284053													0.904464	0.726528	-0.177936
EPHA2		0.0621081	0.0649941	0.002886	0.980079	0.851467	-0.128612				0.480402	0.368795	-0.111607	0.173491	0.153661	-0.0198297	0.0886113	0.0914514	0.0028401
EPHA3					0.507922	0.477078	-0.0308439	0.0600326	0.0490055	-0.0110271	0.303655	0.252339	-0.0513162	0.594414	0.443987	-0.150427	0.0835826	0.0629476	-0.020635
EREG	up	0.0603011	0.0493542	-0.0109469	0.933609	0.713164	-0.220446				0.0711178	0.067244	-0.00387384	0.79642	0.595346	-0.201074	0.0942412	0.0826235	-0.0116177
ERG					0.103788	0.114435	0.0106479	0.578479	0.433561	-0.144917	0.509004	0.383637	-0.125366	0.124208	0.0848569	-0.0393516	0.112872	0.0867736	-0.0260988
ERN1	up	0.0913644	0.0970235	0.00565913	0.916135	0.664834	-0.251301				0.674892	0.483807	-0.191085	0.187366	0.156173	-0.0311932	0.0104292	0.00956299	-0.000866186
ERO1LB	up	0.0357841	0.037419	0.00163493							0.375223	0.290521	-0.0847017	0.0758515	0.0697012	-0.00615029	0.00752879	0.00986054	0.00233175
ERP27	down				0.733862	0.535716	-0.198146				0.46322	0.342654	-0.120566	0.884862	0.68125	-0.203611	0.667861	0.468643	-0.199219
ESCO2		0.00427625	0.00908175	0.0048055	0.840821	0.61055	-0.230271	0.0746049	0.0778159	0.00321094	0.926501	0.718092	-0.208409	0.613	0.411016	-0.201984	0.0435209	0.0401149	-0.00340598
ESRP2	up	0.202009	0.18422	-0.0177897	0.721348	0.572324	-0.149024				0.569811	0.417367	-0.152445	0.226368	0.189527	-0.0368409	0.246112	0.202114	-0.0439978
ETS1		0.558163	0.414268	-0.143894	0.902566	0.662877	-0.239689	0.6742	0.510062	-0.164138	0.438129	0.322563	-0.115566	0.517628	0.383976	-0.133652
ETV4		0.0472073	0.0429634	-0.00424385	0.897169	0.627549	-0.269619	0.0378521	0.0463097	0.00845755	0.281509	0.242721	-0.0387885	0.0834046	0.0809758	-0.00242883
ETV5					0.939175	0.774265	-0.16491	0.0449884	0.048369	0.00338062	0.693354	0.537725	-0.155629	0.0586029	0.0574178	-0.00118503	0.0458715	0.0483405	0.002469
ETV6					0.904902	0.64246	-0.262443	0.0314227	0.0315405	0.000117784	0.736153	0.551959	-0.184194	0.0432332	0.0487944	0.00556123	0.0382601	0.0458003	0.00754021
EXOC2					0.889437	0.593173	-0.296263	0.813832	0.594217	-0.219615	0.929079	0.66275	-0.266329	0.335324	0.25532	-0.0800048	0.0388674	0.0396775	0.00081007
EXOC4		0.0745082	0.0776873	0.00317913	0.906285	0.70866	-0.197625				0.818115	0.60264	-0.215475	0.710175	0.564858	-0.145317	0.0318439	0.0346191	0.00277525
EYA1					0.44141	0.357839	-0.0835708	0.650428	0.509191	-0.141238	0.868278	0.583131	-0.285147	0.784242	0.568696	-0.215546	0.700045	0.561206	-0.138839
EYA2					0.532396	0.438443	-0.0939524	0.570738	0.451076	-0.119663	0.891139	0.703804	-0.187334	0.235272	0.17905	-0.0562221	0.272963	0.228257	-0.0447058
F13A1	up	0.342542	0.285794	-0.0567473	0.0827783	0.0747515	-0.0080268	0.645925	0.542865	-0.10306	0.328502	0.281933	-0.0465694	0.451955	0.344279	-0.107676	0.119865	0.113775	-0.00609003
F3		0.057509	0.0569692	-0.000539813	0.917996	0.712994	-0.205002				0.170309	0.135825	-0.0344837	0.0916263	0.0928776	0.00125127	0.0528716	0.0559133	0.00304168
FABP3	up	0.806068	0.622329	-0.183739	0.87827	0.610701	-0.267569							0.133132	0.12116	-0.011972	0.653289	0.546212	-0.107076
FADS3		0.00404484	0.00497616	0.000931322	0.796384	0.499231	-0.297153				0.461851	0.356905	-0.104946	0.271866	0.217336	-0.0545307	0.0703147	0.0705954	0.000280697
FAM102B		0.0583366	0.0547806	-0.00355603	0.902324	0.662997	-0.239328				0.599872	0.438463	-0.161408	0.197512	0.149619	-0.0478935
FAM111B		0.0881166	0.0865902	-0.00152645				0.706317	0.479178	-0.227139	0.890366	0.581232	-0.309133	0.0973736	0.0838961	-0.0134775	0.136825	0.122966	-0.0138599
FAM114A1								0.704836	0.544703	-0.160133	0.884414	0.700098	-0.184316	0.0811467	0.0846432	0.00349654	0.0448433	0.0463072	0.00146389
FAM122B								0.142808	0.11899	-0.0238173	0.804026	0.578914	-0.225112	0.858131	0.683424	-0.174707	0.0529742	0.0445972	-0.00837702
FAM127C		0.270901	0.204244	-0.0666568				0.0161524	0.0136079	-0.00254458				0.608874	0.413358	-0.195517	0.0588143	0.058714	-0.000100261
FAM129A	down	0.0316926	0.0317831	9.05267e-05	0.0665516	0.058062	-0.0084896				0.620439	0.482415	-0.138024	0.3955	0.298508	-0.0969925
FAM133A		0.0857872	0.0657108	-0.0200764				0.156549	0.111585	-0.0449638	0.345019	0.270399	-0.0746205	0.138801	0.111624	-0.027177	0.0479328	0.0341729	-0.0137599
FAM167A					0.254976	0.173694	-0.0812821	0.749075	0.568667	-0.180408	0.648797	0.479567	-0.16923	0.0354494	0.042478	0.00702855	0.0448798	0.0424872	-0.00239256
FAM168A					0.923154	0.678437	-0.244717	0.619859	0.45893	-0.160929	0.794514	0.596561	-0.197953	0.307926	0.213917	-0.0940084	0.0326802	0.0342308	0.00155058
FAM169A								0.527974	0.390582	-0.137392				0.902597	0.639504	-0.263093	0.732392	0.493949	-0.238443
FAM184A		0.852834	0.609697	-0.243137				0.380904	0.291939	-0.0889655	0.89632	0.704765	-0.191554	0.548902	0.397957	-0.150945	0.124768	0.10673	-0.0180376
FAM196B	down				0.881299	0.647884	-0.233415	0.540003	0.407242	-0.132761				0.393531	0.284558	-0.108972	0.541667	0.423553	-0.118114
FAM198B								0.906124	0.584176	-0.321948	0.804807	0.631768	-0.173039	0.363274	0.263099	-0.100175	0.282145	0.198944	-0.0832004
FAM46C		0.00874098	0.0039101	-0.00483088	0.870205	0.670952	-0.199254	0.31428	0.23768	-0.0765992	0.883617	0.631677	-0.25194	0.272579	0.216124	-0.0564552	0.0470039	0.0444577	-0.00254617
FAM50B		0.486344	0.434968	-0.0513769	0.73704	0.535658	-0.201382	0.628185	0.519321	-0.108864	0.85325	0.573216	-0.280035	0.559129	0.447685	-0.111444	0.582393	0.523411	-0.0589814
FAM65A					0.868468	0.624401	-0.244067	0.252387	0.222873	-0.0295133	0.386386	0.290687	-0.0956994	0.729166	0.582389	-0.146777	0.0534717	0.0516113	-0.00186042
FAM65B		0.307124	0.274413	-0.0327107				0.403265	0.311498	-0.0917672	0.470457	0.354724	-0.115733	0.244633	0.223907	-0.0207258	0.505923	0.443804	-0.0621189
FAM83B	up							0.456268	0.349563	-0.106705	0.492577	0.379088	-0.113489	0.398682	0.293497	-0.105186	0.127521	0.109253	-0.0182674
FAM83D		0.071513	0.0751549	0.00364193	0.912702	0.564057	-0.348645				0.0834616	0.0787549	-0.00470668	0.798507	0.589675	-0.208832	0.121324	0.10495	-0.0163745
FANCE		0.143698	0.119553	-0.0241452							0.730562	0.537459	-0.193103	0.550079	0.433382	-0.116697	0.048206	0.0485332	0.00032729
FANCL		0.0114318	0.00779516	-0.00363666				0.0728413	0.0803008	0.00745951	0.304791	0.235364	-0.069427				0.0528574	0.0475437	-0.00531378
FANCM		0.0697301	0.0657347	-0.00399541							0.903109	0.588312	-0.314798
FARP1	down				0.869599	0.585787	-0.283812	0.612513	0.455151	-0.157362	0.879042	0.655231	-0.223811	0.123101	0.0989408	-0.0241604
FARS2	down				0.622899	0.460888	-0.16201	0.878284	0.703938	-0.174346	0.786331	0.541991	-0.24434
FASN	down	0.0223832	0.0215131	-0.000870053	0.720115	0.594708	-0.125407	0.128312	0.13205	0.0037379	0.87968	0.686578	-0.193102	0.0290484	0.0324796	0.00343117	0.0557761	0.057685	0.00190893
FBN2	up	0.798855	0.603432	-0.195424	0.29583	0.238495	-0.0573354				0.603024	0.478266	-0.124758	0.920161	0.721411	-0.19875
FBXL13					0.571891	0.436141	-0.13575	0.878911	0.640369	-0.238542	0.679049	0.543868	-0.135181
FBXL20		0.0210805	0.0238044	0.00272397	0.894204	0.626798	-0.267406				0.407294	0.296933	-0.110361	0.233637	0.191048	-0.0425884
FBXO30		0.00661037	0.0033587	-0.00325167				0.0721497	0.071476	-0.000673663	0.911358	0.661831	-0.249527	0.0702834	0.0672948	-0.00298862	0.0509353	0.0477688	-0.00316647
FCAR		0.112539	0.0982367	-0.0143023	0.401993	0.348679	-0.0533142				0.567294	0.468199	-0.0990958	0.121013	0.0930467	-0.0279658
FCER1G	up	0.91654	0.722662	-0.193877	0.92644	0.633504	-0.292936				0.537633	0.429929	-0.107705	0.896672	0.66611	-0.230563	0.897277	0.653593	-0.243684
FDFT1		0.00735581	0.00477581	-0.00258	0.878088	0.616474	-0.261614				0.358283	0.284378	-0.0739045	0.0762511	0.0754076	-0.000843434	0.0617035	0.0645843	0.0028808
FEN1					0.795104	0.555275	-0.239829	0.0488297	0.0431756	-0.00565411	0.908008	0.666258	-0.241749
FERMT3	up	0.843168	0.606414	-0.236754	0.800454	0.56849	-0.231964	0.582061	0.452517	-0.129544	0.765907	0.538331	-0.227576	0.874835	0.630467	-0.244368	0.83975	0.599445	-0.240305
FGF16	up	0.73788	0.622347	-0.115533							0.560322	0.440279	-0.120043	0.834962	0.613061	-0.2219	0.490366	0.399834	-0.0905321
FGF2	up	0.893016	0.679605	-0.213411	0.912876	0.681635	-0.231241				0.587003	0.455074	-0.131928	0.85905	0.621986	-0.237065	0.840615	0.674152	-0.166463
FGFBP1		0.325614	0.256619	-0.0689954	0.259678	0.209638	-0.0500404	0.845901	0.569266	-0.276635	0.132295	0.113075	-0.0192192	0.428351	0.316489	-0.111863	0.319442	0.256686	-0.0627563
FGL1								0.889857	0.706114	-0.183744	0.0848777	0.0655542	-0.0193235	0.308704	0.252781	-0.0559228
FHL2		0.200647	0.153237	-0.0474095	0.850942	0.552765	-0.298177	0.412027	0.30546	-0.106567	0.765363	0.511693	-0.25367	0.835162	0.635704	-0.199458	0.538742	0.364051	-0.174692
FILIP1					0.295227	0.212844	-0.0823833	0.363044	0.282877	-0.0801669	0.505559	0.375439	-0.13012	0.330888	0.308627	-0.0222618	0.426454	0.315207	-0.111247
FLNC					0.832749	0.608141	-0.224608	0.00719775	0.00642616	-0.000771594	0.833131	0.633378	-0.199753	0.0799046	0.0816215	0.0017169	0.0384641	0.0634025	0.0249384
FLT1	up	0.342716	0.29642	-0.0462964							0.36161	0.28627	-0.0753398	0.400613	0.331748	-0.0688645
FMO6P											0.19683	0.186734	-0.0100967	0.164839	0.129284	-0.0355554	0.129563	0.0881544	-0.0414091
FMR1NB	up	0.388315	0.316447	-0.0718679										0.211707	0.203799	-0.00790823	0.625692	0.508292	-0.1174
FNBP1L					0.916266	0.66551	-0.250756	0.0279715	0.0265413	-0.00143018	0.423138	0.321875	-0.101263	0.161508	0.133505	-0.0280023	0.0905627	0.0899553	-0.000607433
FOLR1		0.530316	0.396393	-0.133923	0.104096	0.0745199	-0.0295763	0.492282	0.373073	-0.11921	0.310396	0.241509	-0.068887	0.390009	0.329621	-0.0603878
FOSL1		0.130541	0.127201	-0.0033403	0.158249	0.138415	-0.0198343				0.332141	0.260002	-0.0721396	0.355085	0.255526	-0.0995594	0.0412966	0.0396523	-0.00164426
FOXD1	up	0.940118	0.54694	-0.393178	0.953978	0.60063	-0.353348	0.902198	0.550689	-0.351509				0.931647	0.686574	-0.245073
FOXG1		0.66915	0.530791	-0.13836										0.674844	0.525912	-0.148933	0.60535	0.501743	-0.103606
FOXI1		0.595121	0.503046	-0.0920746	0.783481	0.598162	-0.185319				0.285052	0.223411	-0.0616408	0.685788	0.519964	-0.165824	0.427483	0.365364	-0.0621194
FOXRED2		0.0533095	0.0364634	-0.016846	0.748281	0.598738	-0.149544	0.926202	0.70279	-0.223412	0.925	0.684488	-0.240511	0.30124	0.219445	-0.0817946	0.0533739	0.0456726	-0.00770125
FRMD6		0.9137	0.697458	-0.216242	0.946015	0.670678	-0.275337	0.605465	0.452294	-0.153171	0.858751	0.575911	-0.28284	0.317785	0.242519	-0.0752657	0.346471	0.290103	-0.0563681
FRZB		0.772249	0.66494	-0.107308	0.387053	0.304961	-0.0820925	0.905842	0.661554	-0.244288	0.611109	0.463874	-0.147234	0.697095	0.575472	-0.121623	0.587621	0.457541	-0.130079
FSCN1	up	0.843808	0.529075	-0.314733	0.905572	0.719203	-0.186369	0.495845	0.505408	0.00956278	0.729091	0.595452	-0.133639	0.259423	0.259878	0.000455563	0.576094	0.573861	-0.00223321
FSTL1					0.894045	0.688324	-0.205721	0.0332718	0.0283666	-0.00490522	0.734054	0.555112	-0.178942	0.894939	0.710208	-0.184731
FTO					0.893859	0.660561	-0.233299				0.640041	0.466849	-0.173192	0.0793231	0.0764413	-0.00288183
FUCA1		0.063378	0.0501343	-0.0132437	0.862057	0.635902	-0.226154				0.311809	0.239649	-0.0721599	0.091945	0.078662	-0.0132829	0.0788202	0.0769211	-0.0018991
FXYD3					0.728086	0.473483	-0.254603	0.213791	0.170775	-0.0430158	0.611658	0.447222	-0.164436	0.0818447	0.0703853	-0.0114594	0.106436	0.0903414	-0.0160943
FYN								0.776609	0.577566	-0.199043	0.87773	0.701871	-0.17586	0.0493814	0.0459943	-0.00338708	0.0664277	0.0649102	-0.00151751
GAA					0.53223	0.437004	-0.0952257	0.16901	0.139104	-0.0299067	0.772337	0.591444	-0.180893	0.190075	0.151506	-0.0385694	0.0093369	0.00534984	-0.00398705
GABARAPL1		0.038486	0.0403007	0.00181469	0.875157	0.640177	-0.23498				0.177702	0.158278	-0.0194244	0.230172	0.205391	-0.0247811	0.112556	0.107459	-0.00509726
GABRA2								0.422875	0.306765	-0.11611	0.385944	0.290109	-0.095835	0.549302	0.423737	-0.125566	0.627827	0.429333	-0.198494
GABRA3		0.825842	0.692136	-0.133706	0.0873191	0.0833247	-0.00399442	0.191076	0.157211	-0.0338649	0.0644914	0.0644506	-4.081e-05	0.0632833	0.0564208	-0.00686253	0.445279	0.34508	-0.100199
GABRG1					0.165578	0.116971	-0.0486068	0.0773844	0.0673828	-0.0100016				0.111973	0.0892841	-0.022689	0.287471	0.223454	-0.0640171
GABRQ	up	0.631941	0.584891	-0.0470494							0.36313	0.284084	-0.0790454	0.746699	0.554959	-0.19174	0.463838	0.379575	-0.0842635
GADD45A								0.0546983	0.0508504	-0.00384793	0.109793	0.10089	-0.00890275	0.0552692	0.0552536	-1.55653e-05	0.0443392	0.0429699	-0.00136938
GAGE1					0.07926	0.0596756	-0.0195844				0.538293	0.435981	-0.102313
GALM					0.886174	0.614193	-0.271981	0.0530027	0.0620342	0.00903154	0.505501	0.371743	-0.133758	0.651401	0.479564	-0.171838	0.131759	0.114123	-0.0176358
GANC											0.479335	0.363475	-0.11586	0.0435345	0.0434342	-0.000100288
GARS					0.927037	0.581842	-0.345195	0.0408829	0.0375319	-0.00335094	0.350353	0.267683	-0.08267	0.0642987	0.0510494	-0.0132493	0.0608159	0.0555314	-0.00528452
GAS5											0.106957	0.0865836	-0.0203731
GATA6					0.925485	0.687385	-0.2381	0.0810554	0.0798479	-0.00120748	0.682611	0.5277	-0.15491	0.0868715	0.0670217	-0.0198498	0.0312402	0.0355421	0.00430188
GATSL2											0.153734	0.139061	-0.0146724	0.00648386	0.0124316	0.0059477
GBP2		0.0486863	0.0459011	-0.00278519				0.735502	0.505776	-0.229726	0.363834	0.269185	-0.0946497	0.645294	0.505192	-0.140102
GCH1	up	0.0699659	0.0640731	-0.00589283	0.806054	0.675159	-0.130895	0.11858	0.124266	0.00568553	0.283092	0.223524	-0.0595676	0.210205	0.164444	-0.0457605
GCNT4	up							0.703661	0.500585	-0.203076				0.665237	0.530255	-0.134982
GDA		0.919664	0.618371	-0.301294	0.414189	0.32936	-0.0848288				0.894371	0.661175	-0.233196	0.519061	0.385982	-0.133079	0.640992	0.475113	-0.165879
GDAP1	up	0.0433911	0.0473405	0.00394942	0.909262	0.722141	-0.187122				0.677466	0.520476	-0.156989	0.176962	0.133285	-0.0436773	0.101435	0.0771419	-0.0242935
GDF15	up	0.471197	0.364091	-0.107106	0.847976	0.602644	-0.245332				0.357811	0.264221	-0.0935907	0.572057	0.452079	-0.119977	0.327074	0.284641	-0.0424334
GDPD1		0.0642526	0.0622983	-0.00195434	0.728423	0.515015	-0.213409	0.01402	0.00954151	-0.00447849	0.273828	0.229065	-0.0447626	0.106596	0.0906513	-0.0159445	0.0360029	0.0330612	-0.00294171
GFRA1	up	0.710521	0.579337	-0.131183	0.612789	0.477728	-0.135061	0.609227	0.50404	-0.105187	0.488071	0.383453	-0.104618	0.586866	0.447281	-0.139585
GGT1	up							0.281655	0.229696	-0.0519589	0.612064	0.494649	-0.117415	0.719999	0.5484	-0.1716	0.55603	0.436617	-0.119413
GGT3P	up										0.275093	0.235072	-0.0400207	0.374423	0.312264	-0.0621594
GINS1		0.0339689	0.0310186	-0.00295028	0.878327	0.747624	-0.130703				0.353616	0.252945	-0.100671	0.131351	0.094978	-0.0363735	0.00886029	0.0100106	0.00115035
GINS2					0.424424	0.317683	-0.106741	0.00583269	0.00606147	0.000228777	0.461109	0.363071	-0.0980388	0.644821	0.500078	-0.144743	0.0315862	0.0333489	0.00176273
GIPC2		0.909868	0.662783	-0.247085							0.833848	0.641352	-0.192496	0.757536	0.556061	-0.201474	0.911884	0.633445	-0.278439
GJB3		0.118644	0.0986178	-0.020026	0.828134	0.614783	-0.213351	0.475489	0.353431	-0.122058	0.881965	0.604302	-0.277663	0.459492	0.328652	-0.130839	0.123783	0.109532	-0.014251
GJC1	up	0.93145	0.614678	-0.316772	0.882261	0.718504	-0.163756	0.793546	0.579096	-0.21445	0.712917	0.603324	-0.109593	0.696505	0.536615	-0.15989
GKN2	up										0.681834	0.512539	-0.169295	0.639674	0.458114	-0.18156
GLA	up										0.899121	0.707986	-0.191136	0.0337326	0.0516357	0.0179031
GLB1L3	up				0.119087	0.108983	-0.0101032	0.526485	0.427457	-0.0990282	0.445672	0.370757	-0.0749149	0.661754	0.514574	-0.14718	0.711708	0.564333	-0.147375
GLDC		0.883305	0.698035	-0.18527	0.84295	0.623272	-0.219679	0.935313	0.819568	-0.115745	0.499118	0.386578	-0.11254	0.851282	0.648499	-0.202783	0.814321	0.630071	-0.18425
GLI1					0.0401097	0.0371577	-0.00295202	0.160016	0.13118	-0.028836	0.252444	0.212341	-0.0401035	0.0560819	0.05969	0.00360817	0.0579585	0.0558733	-0.00208513
GLIPR1		0.0523451	0.05617	0.00382491							0.872153	0.688307	-0.183846	0.908992	0.638907	-0.270085	0.047642	0.0577589	0.0101169
GLTSCR2		0.234446	0.206118	-0.0283281	0.851078	0.625161	-0.225918				0.614791	0.474684	-0.140107	0.312235	0.221287	-0.0909481	0.0571335	0.0555198	-0.00161372
GLYATL2					0.146323	0.135367	-0.0109562	0.18269	0.146188	-0.0365018	0.101761	0.0894127	-0.0123479	0.134896	0.129971	-0.00492517	0.0335076	0.0207368	-0.0127708
GMDS	down				0.945469	0.802013	-0.143456	0.031762	0.031978	0.000215963	0.798096	0.575407	-0.222689	0.0794419	0.0762868	-0.00315503	0.0215653	0.0197671	-0.00179818
GMFG	up				0.0374566	0.0436653	0.0062087	0.661331	0.509353	-0.151978	0.348605	0.293038	-0.0555671	0.494527	0.386056	-0.108471	0.526965	0.380664	-0.146301
GMNN		0.0337732	0.0175781	-0.016195				0.0694672	0.065238	-0.00422922				0.0520909	0.0572567	0.00516581	0.0747817	0.0814004	0.00661875
GNA14		0.471433	0.409943	-0.0614897							0.452841	0.366743	-0.086098	0.134681	0.126057	-0.0086243	0.140974	0.16258	0.0216051
GNG11	up	0.0539238	0.0572431	0.00331927										0.852448	0.562631	-0.289817	0.0824115	0.0796033	-0.00280822
GPC4		0.0983658	0.0779928	-0.020373	0.0555256	0.0590537	0.00352801	0.298734	0.219284	-0.0794495	0.110525	0.0936702	-0.0168549	0.0991181	0.0926306	-0.00648757	0.106867	0.0967583	-0.010109
GPC6	down	0.0639887	0.0614238	-0.00256489	0.822692	0.604653	-0.218039				0.539578	0.415726	-0.123852	0.551508	0.371969	-0.17954	0.0684291	0.065965	-0.00246414
GPD1L		0.0310762	0.0328305	0.0017542	0.864451	0.606186	-0.258265				0.414295	0.318466	-0.095829	0.150536	0.117486	-0.0330503	0.0286458	0.0223366	-0.00630918
GPD2		0.279871	0.208896	-0.0709756	0.863261	0.54826	-0.315	0.413117	0.282582	-0.130534	0.845044	0.621694	-0.22335	0.496451	0.356611	-0.13984
GPHN	down	0.0737062	0.0734431	-0.000263087	0.896901	0.74996	-0.14694				0.503468	0.383803	-0.119665	0.910284	0.597497	-0.312786	0.0974779	0.073377	-0.024101
GPR110					0.914404	0.709172	-0.205232	0.419878	0.320228	-0.0996503	0.802522	0.589171	-0.213351	0.848331	0.580662	-0.267669	0.576826	0.424674	-0.152152
GPR155					0.925135	0.699276	-0.225859	0.406426	0.299447	-0.106978	0.118531	0.0919712	-0.0265602	0.259732	0.194598	-0.0651345	0.0564374	0.054838	-0.00159943
GPR85	up	0.809625	0.582511	-0.227113	0.862199	0.65571	-0.206489	0.23185	0.180043	-0.0518065	0.633772	0.436605	-0.197167	0.422928	0.304986	-0.117942
GPR87	up							0.385953	0.288704	-0.0972494	0.759723	0.597015	-0.162707
GPRC5A		0.0613443	0.062487	0.00114261	0.884909	0.691751	-0.193157	0.155019	0.130532	-0.0244869	0.863468	0.638706	-0.224761	0.0850629	0.0767146	-0.00834825	0.0606811	0.0617468	0.00106564
GPRC5B	up	0.00785617	0.00673893	-0.00111724	0.825284	0.680402	-0.144881	0.590248	0.481412	-0.108836	0.759598	0.563739	-0.195859	0.388008	0.308395	-0.0796127	0.17536	0.158263	-0.0170976
GPX7		0.371332	0.32943	-0.0419024	0.92124	0.680852	-0.240387				0.607009	0.483622	-0.123388	0.644792	0.455551	-0.189241	0.376771	0.328764	-0.0480077
GRB10					0.932803	0.693734	-0.239069	0.769263	0.559429	-0.209834	0.87073	0.626308	-0.244421	0.48692	0.355163	-0.131757
GREM1	up				0.798762	0.607309	-0.191453	0.888897	0.691404	-0.197493	0.926126	0.65837	-0.267756	0.844257	0.696291	-0.147966	0.944718	0.603913	-0.340805
GRHL1					0.850207	0.709711	-0.140496	0.0227242	0.0182169	-0.00450729	0.69203	0.515386	-0.176644	0.344667	0.272731	-0.0719352	0.0379267	0.0376173	-0.000309395
GTF2I					0.792755	0.613879	-0.178877	0.278267	0.217532	-0.0607355	0.913101	0.670005	-0.243095	0.0817127	0.0762466	-0.00546604	0.0129893	0.0139166	0.000927302
GTF2IRD2B								0.260285	0.216565	-0.0437195	0.903231	0.496906	-0.406325
GTPBP2		0.105427	0.0964721	-0.00895497	0.879596	0.559483	-0.320113				0.488165	0.378513	-0.109651
GTSF1	up				0.294445	0.211875	-0.0825703	0.705638	0.579833	-0.125805	0.486596	0.368092	-0.118504	0.386076	0.308087	-0.077989	0.601988	0.435495	-0.166493
GUCY1B3		0.0853911	0.0806565	-0.00473452	0.664732	0.480693	-0.184039				0.494007	0.365299	-0.128708	0.761962	0.558166	-0.203796	0.177652	0.138444	-0.039208
GULP1								0.665736	0.491657	-0.17408	0.762973	0.556817	-0.206156	0.0579907	0.056095	-0.00189562	0.0827865	0.0783175	-0.00446901
GYPC					0.0535347	0.0504167	-0.003118	0.687797	0.564831	-0.122965	0.339099	0.273372	-0.0657267	0.37072	0.332152	-0.0385689	0.34434	0.27788	-0.0664597
H19											0.589095	0.506657	-0.0824385	0.573133	0.481219	-0.0919146	0.371516	0.315246	-0.05627
H1F0	down	0.0607503	0.0587247	-0.00202556										0.680325	0.553707	-0.126617	0.0144639	0.00751068	-0.00695324
H1FX		0.0659125	0.0653507	-0.000561817										0.0591179	0.0577386	-0.00137932	0.0456136	0.0464833	0.000869688
H2AFY2					0.970423	0.713123	-0.257299	0.601489	0.488236	-0.113253	0.952786	0.620594	-0.332192	0.55834	0.427448	-0.130891	0.577053	0.418209	-0.158845
HAP1		0.732247	0.553187	-0.17906	0.211408	0.173722	-0.0376862				0.489722	0.367184	-0.122539	0.734138	0.603007	-0.131131	0.759418	0.604421	-0.154998
HAPLN1	up	0.899327	0.612245	-0.287082	0.877786	0.758158	-0.119628	0.663966	0.510896	-0.15307	0.751421	0.512479	-0.238941	0.456032	0.326708	-0.129324	0.921279	0.684045	-0.237233
HBEGF		0.0449176	0.0494381	0.00452043	0.894134	0.641125	-0.253009				0.263342	0.20772	-0.055622	0.0860149	0.0796152	-0.00639968
HCG11	up										0.571906	0.466742	-0.105164	0.0781151	0.0718328	-0.00628232	0.141012	0.116937	-0.0240756
HCLS1	up	0.788427	0.545488	-0.242938							0.514343	0.398841	-0.115502	0.896002	0.68117	-0.214832	0.588487	0.385877	-0.202611
HECW2	up				0.621907	0.448488	-0.173419	0.612958	0.42038	-0.192578	0.535501	0.391218	-0.144282	0.197207	0.160786	-0.0364208	0.125428	0.107825	-0.0176034
HEG1		0.0145844	0.012924	-0.00166046	0.914734	0.594436	-0.320298				0.76618	0.590212	-0.175968	0.0809117	0.0705368	-0.0103748	0.0216062	0.020345	-0.00126121
HELLS		0.0258272	0.0284292	0.00260201							0.255187	0.201533	-0.0536537	0.276767	0.217291	-0.0594762	0.055475	0.0540941	-0.00138086
HERC5		0.0361191	0.038396	0.00227689	0.414296	0.26191	-0.152386				0.640337	0.461795	-0.178542	0.0968954	0.0944518	-0.00244356	0.0610295	0.0644505	0.00342106
HERPUD1		0.0472298	0.0425644	-0.00466542							0.312693	0.237013	-0.0756799	0.118044	0.0992753	-0.0187689	0.110905	0.0914976	-0.019407
HFE		0.122244	0.107398	-0.0148461	0.651201	0.449086	-0.202115				0.0782655	0.0599487	-0.0183168	0.76064	0.554013	-0.206627
HHIP	up	0.0774136	0.0703687	-0.00704482							0.609945	0.441934	-0.168011	0.530102	0.397114	-0.132987	0.135188	0.105729	-0.0294588
HIPK2		0.057084	0.0585403	0.00145629	0.92471	0.692134	-0.232575				0.805079	0.573045	-0.232034
HIST1H1A	up	0.90391	0.672183	-0.231727	0.881127	0.729599	-0.151528	0.732786	0.528832	-0.203955				0.913285	0.658984	-0.254301	0.876224	0.6138	-0.262424
HIST1H1B	up	0.430917	0.344404	-0.0865134										0.229926	0.168793	-0.0611327	0.670602	0.496419	-0.174184
HIST1H1C		0.101977	0.0987504	-0.00322673				0.0881944	0.0865167	-0.00167769				0.0870736	0.0795948	-0.00747875	0.0275202	0.0270075	-0.000512681
HIST1H1D		0.588869	0.441956	-0.146913	0.420643	0.326569	-0.0940741							0.5577	0.411334	-0.146366	0.75613	0.577281	-0.178849
HIST1H1E		0.0389981	0.0353336	-0.00366451										0.0623849	0.0588217	-0.00356326	0.0424643	0.0424479	-1.63924e-05
HIST1H1T	up	0.848987	0.595506	-0.253481				0.882027	0.582543	-0.299483				0.648709	0.494446	-0.154264	0.895489	0.667297	-0.228192
HIST1H2AA	up													0.372445	0.27646	-0.0959847	0.56863	0.407281	-0.161349
HIST1H2AB	down													0.14076	0.123059	-0.0177009	0.0591881	0.0584376	-0.000750518
HIST1H2AC		0.14505	0.134466	-0.0105845										0.0591994	0.0599323	0.000732891	0.0484762	0.0495119	0.00103569
HIST1H2AD					0.326922	0.223039	-0.103883										0.50093	0.296325	-0.204605
HIST1H2AE	up													0.633793	0.501979	-0.131814	0.666115	0.4829	-0.183215
HIST1H2AI	up	0.211874	0.166848	-0.0450259										0.528515	0.420275	-0.10824	0.409066	0.321691	-0.0873746
HIST1H2AJ	down	0.425951	0.351379	-0.0745719										0.730242	0.576861	-0.153381
HIST1H2AK														0.202253	0.146829	-0.055424
HIST1H2BA	up	0.493444	0.391843	-0.101601										0.678543	0.519094	-0.159448
HIST1H2BD	up	0.384614	0.359181	-0.0254331	0.336311	0.226581	-0.109731	0.0540965	0.049119	-0.00497748				0.0879426	0.082605	-0.00533754	0.0501728	0.0491617	-0.0010111
HIST1H2BF	up													0.682298	0.539697	-0.142601
HIST1H2BI	up	0.775578	0.632171	-0.143406	0.830689	0.597519	-0.23317										0.840706	0.614112	-0.226593
HIST1H2BJ	up													0.364088	0.289934	-0.074154	0.0480186	0.0434001	-0.00461845
HIST1H2BM														0.462407	0.376401	-0.0860056	0.33176	0.24798	-0.0837802
HIST1H2BN	up	0.389425	0.32955	-0.0598753										0.363666	0.30036	-0.0633056	0.402075	0.310818	-0.0912571
HIST1H3B	down	0.175478	0.168227	-0.00725075										0.164425	0.161454	-0.00297149	0.0526667	0.051928	-0.000738738
HIST1H3G	up	0.730252	0.578689	-0.151564	0.936467	0.70284	-0.233627							0.690812	0.48678	-0.204032	0.825951	0.65873	-0.167221
HIST1H3I	up	0.825219	0.634475	-0.190744													0.486745	0.342869	-0.143876
HIST1H4B	down	0.0932	0.0972552	0.00405521	0.0262458	0.0234257	-0.00282004							0.845481	0.539896	-0.305585	0.0328805	0.0311561	-0.00172436
HIST1H4D	up	0.84133	0.625814	-0.215516	0.962786	0.661253	-0.301533							0.534309	0.405194	-0.129115	0.88585	0.633832	-0.252018
HIST1H4H	up	0.0681695	0.0647394	-0.00343009										0.0568625	0.0529986	-0.00386386	0.171818	0.162973	-0.00884535
HIST1H4L	up	0.808649	0.576912	-0.231737										0.630501	0.445512	-0.184989	0.734148	0.542526	-0.191622
HIST2H2AA4														0.147643	0.107693	-0.0399506
HIST2H2AB	down	0.0334301	0.038431	0.00500089										0.0694043	0.0755331	0.00612874	0.0385863	0.041999	0.00341268
HIST2H2BA											0.597227	0.393126	-0.204101	0.0777203	0.0745778	-0.00314249
HIST3H2BB					0.4138	0.347404	-0.066396							0.754033	0.565619	-0.188414
HKDC1					0.693251	0.507599	-0.185652	0.451521	0.359004	-0.0925162	0.595954	0.467596	-0.128358	0.282377	0.223115	-0.0592618
HLCS					0.831858	0.696982	-0.134876	0.393009	0.293812	-0.0991967				0.459337	0.368909	-0.0904279	0.0423352	0.0431546	0.000819433
HLTF					0.92517	0.664423	-0.260747	0.0087157	0.011442	0.00272628	0.28079	0.206532	-0.0742577	0.867828	0.657249	-0.210579	0.058548	0.0597192	0.00117116
HMGB3		0.0347035	0.0324585	-0.00224501	0.615928	0.392849	-0.223079	0.0821267	0.0761102	-0.00601659				0.161153	0.144701	-0.0164518	0.0390039	0.041325	0.00232104
HMGCL		0.0100375	0.0125679	0.00253035							0.451343	0.331115	-0.120228	0.866262	0.674964	-0.191298	0.0558115	0.0456329	-0.0101786
HMGCR		0.0138405	0.0168078	0.00296723	0.896468	0.665843	-0.230625	0.222441	0.16761	-0.0548308	0.546085	0.393256	-0.152829	0.0732595	0.0561443	-0.0171152	0.0428872	0.0436912	0.000804015
HMGCS1					0.935978	0.610898	-0.325079	0.534606	0.382868	-0.151738	0.880862	0.673078	-0.207785	0.02177	0.0221403	0.000370305	0.0354692	0.0416749	0.00620575
HNRNPA1L2		0.0358062	0.0389866	0.00318046				0.883527	0.58496	-0.298567	0.80601	0.656789	-0.149222	0.0802854	0.0728288	-0.00745656	0.0524285	0.0540014	0.00157289
HOOK1		0.390094	0.358499	-0.0315951	0.333048	0.24791	-0.0851382	0.142651	0.105836	-0.0368146	0.522517	0.411987	-0.11053	0.258705	0.22036	-0.038345	0.0604246	0.0501716	-0.010253
HORMAD1	up	0.916388	0.794051	-0.122337				0.95981	0.807936	-0.151874	0.785635	0.576991	-0.208644				0.835769	0.556241	-0.279528
HOXA4		0.757086	0.604197	-0.152889	0.485245	0.369742	-0.115503	0.932964	0.760591	-0.172372	0.73141	0.561942	-0.169468	0.855214	0.633718	-0.221496	0.773742	0.59894	-0.174802
HOXB2	up	0.899739	0.718369	-0.18137	0.880042	0.726024	-0.154018				0.787765	0.562452	-0.225313	0.672596	0.501339	-0.171257	0.900744	0.696869	-0.203875
HOXB5	up				0.884757	0.755822	-0.128935
HOXD13	up	0.826235	0.610274	-0.215961	0.909072	0.729309	-0.179763				0.777323	0.562674	-0.214649	0.767902	0.575118	-0.192785	0.959709	0.808888	-0.150821
HPSE	up	0.0708939	0.0635427	-0.00735121				0.0565977	0.0502942	-0.00630358	0.501913	0.370235	-0.131678	0.265513	0.187195	-0.0783176
HRASLS	up	0.149631	0.101076	-0.0485548				0.446753	0.34673	-0.100023	0.462795	0.336483	-0.126312	0.214344	0.162882	-0.0514616
HRASLS5	up	0.445321	0.399743	-0.0455772	0.065437	0.0611451	-0.00429187				0.625953	0.43179	-0.194163	0.217844	0.169746	-0.0480979	0.0824756	0.066306	-0.0161696
HSD17B2	up				0.275349	0.206761	-0.068588	0.47271	0.348714	-0.123995	0.548048	0.426603	-0.121444	0.500948	0.399569	-0.101379	0.187839	0.162962	-0.0248768
HSD17B6	up							0.302949	0.244601	-0.0583474	0.893667	0.715489	-0.178177
HSPA13								0.0542844	0.0574102	0.00312578	0.609327	0.405604	-0.203723	0.0457415	0.0462965	0.000554974	0.053773	0.0507933	-0.0029797
HSPA1A		0.638106	0.551155	-0.0869516										0.428018	0.359099	-0.0689194	0.426532	0.381153	-0.0453788
HSPA1B		0.0792361	0.0811013	0.00186521	0.0517087	0.0432564	-0.00845226							0.0970768	0.0912493	-0.00582749	0.263576	0.244104	-0.019472
HSPA2	up	0.802833	0.563982	-0.238851	0.90905	0.652284	-0.256766							0.0613202	0.0552903	-0.00602991	0.0374937	0.0374982	4.42978e-06
HSPA8		0.0374538	0.0336929	-0.00376089				0.0785452	0.0866971	0.0081519	0.29282	0.228501	-0.0643188	0.0767848	0.0822184	0.00543362	0.0697756	0.065719	-0.00405661
HSPB6	up	0.90024	0.562277	-0.337963	0.948818	0.749684	-0.199134				0.93274	0.670639	-0.2621	0.0749593	0.0749372	-2.21305e-05	0.66295	0.485003	-0.177946
HTR1D		0.938666	0.724975	-0.213691	0.805243	0.675451	-0.129792							0.700557	0.572727	-0.12783	0.172318	0.131064	-0.0412536
HTRA1	down	0.044904	0.0451055	0.000201513	0.871512	0.669998	-0.201514				0.614783	0.457373	-0.15741	0.271722	0.195393	-0.076329	0.05571	0.0484466	-0.00726345
HYAL1					0.086478	0.0825064	-0.00397162	0.819811	0.702645	-0.117165	0.899709	0.674026	-0.225683	0.864324	0.711164	-0.153159	0.8098	0.682856	-0.126944
ICAM1	up	0.0729983	0.0610262	-0.0119721							0.562234	0.434261	-0.127974	0.131523	0.120724	-0.0107993	0.202039	0.167219	-0.0348203
ID4		0.239243	0.196266	-0.0429764	0.110773	0.0846471	-0.0261259				0.242567	0.229101	-0.013466	0.341084	0.288788	-0.0522959	0.159259	0.128979	-0.0302799
IDI1		0.0536837	0.0558926	0.00220887	0.897382	0.701382	-0.196				0.0700873	0.0644427	-0.00564462	0.0623272	0.0612739	-0.0010533	0.03521	0.0324513	-0.00275871
IDS		0.0468082	0.0690413	0.0222331							0.591698	0.412782	-0.178917	0.520816	0.415642	-0.105174	0.0871681	0.078323	-0.00884511
IFI30	up	0.0875441	0.0907259	0.00318178	0.971963	0.788781	-0.183183				0.0982094	0.0964543	-0.00175506	0.745795	0.608851	-0.136944	0.246791	0.203947	-0.0428442
IFI44	up										0.594604	0.3933	-0.201304	0.06838	0.0542	-0.01418
IFI6	up	0.0496213	0.0428822	-0.00673912				0.958888	0.650076	-0.308812	0.799443	0.544741	-0.254702	0.330848	0.257669	-0.0731785	0.0645001	0.0700275	0.00552744
IFIT1	up							0.0471378	0.0403693	-0.00676844	0.289234	0.198198	-0.091036	0.043075	0.0430484	-2.66e-05	0.0547927	0.0499544	-0.00483833
IFIT3								0.0619702	0.0604708	-0.00149938	0.473247	0.36306	-0.110187				0.0430626	0.0470941	0.00403149
IFT57					0.737223	0.537818	-0.199406	0.012812	0.00999559	-0.00281641	0.390511	0.297175	-0.0933368				0.05405	0.0588228	0.00477284
IGF2BP1	up	0.943313	0.755236	-0.188077	0.755892	0.603803	-0.152089				0.573713	0.445653	-0.12806	0.805664	0.621661	-0.184003	0.428226	0.345728	-0.0824975
IGF2BP2		0.42228	0.397198	-0.025082				0.312203	0.293364	-0.0188388	0.463646	0.356596	-0.10705	0.10084	0.0913853	-0.00945494
IGFBP7		0.0410138	0.0303372	-0.0106766							0.65058	0.464485	-0.186096	0.0438004	0.0472303	0.00342989	0.00968946	0.0153432	0.00565378
IKZF2		0.0630033	0.0598757	-0.00312761	0.479937	0.346815	-0.133122				0.774314	0.562516	-0.211797	0.0999785	0.0953852	-0.00459336	0.0930332	0.087847	-0.00518625
IL11	up				0.861555	0.655332	-0.206223				0.245542	0.201092	-0.0444498	0.524374	0.410125	-0.114249	0.115608	0.102594	-0.0130144
IL12RB2					0.847541	0.541381	-0.306161	0.752305	0.615329	-0.136976	0.579811	0.432464	-0.147347				0.681469	0.519602	-0.161867
IL13RA2	up							0.682075	0.468359	-0.213715				0.292166	0.229178	-0.0629878	0.242148	0.184734	-0.0574138
IL17RE		0.194002	0.166907	-0.0270949	0.151365	0.132125	-0.0192401				0.534428	0.438118	-0.0963093	0.8671	0.639271	-0.227829	0.15489	0.122398	-0.032492
IL18R1					0.160674	0.115458	-0.0452152				0.463719	0.32525	-0.138469	0.447375	0.355091	-0.0922841
IL1A	up	0.214802	0.166304	-0.0484979							0.884301	0.670054	-0.214247	0.806634	0.562163	-0.244472
IL1B	up	0.635743	0.508693	-0.12705	0.837579	0.704115	-0.133464	0.910166	0.697213	-0.212954	0.82941	0.605376	-0.224034	0.532287	0.406859	-0.125428	0.73027	0.595464	-0.134806
IL1RAPL1					0.673107	0.445715	-0.227393	0.398502	0.303491	-0.0950119	0.650945	0.519521	-0.131425	0.385839	0.297778	-0.0880615	0.292864	0.223962	-0.0689023
IL20RB		0.806685	0.652694	-0.15399	0.709845	0.502359	-0.207486				0.900148	0.740018	-0.16013	0.900701	0.596132	-0.304569	0.646354	0.421337	-0.225017
IL23A	up							0.247602	0.222734	-0.0248679	0.567919	0.48353	-0.0843891	0.254129	0.205565	-0.0485647	0.232045	0.169293	-0.0627523
IL24	up	0.844227	0.648421	-0.195806				0.89298	0.61399	-0.27899	0.863829	0.677358	-0.186471	0.771293	0.602507	-0.168786
IL2RG	up	0.327486	0.261076	-0.06641										0.452736	0.340277	-0.112459	0.237789	0.200887	-0.0369025
IL6	up							0.0859586	0.0779991	-0.00795954	0.475599	0.353182	-0.122417	0.494459	0.364835	-0.129624	0.0160148	0.0262243	0.0102096
IL6R					0.770273	0.594737	-0.175536	0.0133733	0.0145424	0.0011691	0.552109	0.400691	-0.151418	0.598228	0.445162	-0.153065	0.136287	0.110538	-0.0257498
IL7R	up	0.0484922	0.0532055	0.0047133							0.447123	0.314146	-0.132977	0.830749	0.600095	-0.230654
ILF2											0.103371	0.118589	0.0152176	0.0829408	0.0794671	-0.00347372	0.0368226	0.0285499	-0.00827275
IMPA1		0.00428902	0.0060769	0.00178789	0.857533	0.649475	-0.208059	0.361556	0.251163	-0.110393	0.781879	0.615805	-0.166074	0.741398	0.546441	-0.194958	0.0555538	0.049474	-0.00607989
IMPA2		0.0578339	0.0650996	0.00726564	0.901684	0.634766	-0.266918				0.339671	0.263322	-0.0763496	0.0545772	0.0505357	-0.00404148	0.0385166	0.0431424	0.00462581
INA	up	0.851052	0.588176	-0.262876	0.276756	0.224933	-0.0518233				0.319544	0.283874	-0.0356704	0.952447	0.736089	-0.216358	0.901933	0.688568	-0.213365
INHBA	up							0.676068	0.468784	-0.207284	0.505561	0.38104	-0.124521
INPP5A	down	0.0489984	0.0531629	0.00416458	0.927796	0.725834	-0.201961				0.869156	0.651762	-0.217394	0.0966195	0.0896581	-0.0069614	0.0681049	0.0658415	-0.00226336
INPP5F					0.915306	0.681482	-0.233824	0.0999161	0.0920663	-0.00784985	0.830133	0.634101	-0.196032	0.251172	0.185602	-0.0655699
INSIG1	down				0.904355	0.650814	-0.253541	0.043024	0.0332631	-0.00976091	0.460053	0.334982	-0.125071	0.0918069	0.0837147	-0.00809222	0.00934468	0.00845581	-0.000888872
INSL6		0.724901	0.592948	-0.131954							0.726597	0.517415	-0.209182	0.850947	0.627711	-0.223236	0.568022	0.448613	-0.119409
IPP								0.213183	0.153411	-0.0597721	0.823622	0.661707	-0.161916	0.0504479	0.0613269	0.010879	0.0600623	0.0546255	-0.0054368
IPW											0.0609869	0.0899742	0.0289873	0.0756015	0.0624734	-0.013128
IQCE		0.0747209	0.0744886	-0.000232332	0.773605	0.597653	-0.175951				0.852239	0.653479	-0.19876	0.647294	0.483656	-0.163638	0.208862	0.19994	-0.00892222
IQGAP2	up				0.87454	0.661343	-0.213197	0.192907	0.167409	-0.0254973	0.579339	0.43369	-0.145649	0.257471	0.195875	-0.0615965
IRAK3		0.0338046	0.031931	-0.00187357	0.732491	0.511824	-0.220666				0.591741	0.451874	-0.139867	0.807074	0.620738	-0.186336	0.562418	0.410688	-0.151731
IRF2BP2		0.0384787	0.0398763	0.00139758	0.0618248	0.0576302	-0.00419462				0.0766929	0.0747542	-0.00193869	0.0344061	0.0363806	0.00197445
IRS2		0.703701	0.512452	-0.191248	0.939487	0.715884	-0.223603	0.0204511	0.0217539	0.00130283	0.653355	0.45428	-0.199075	0.111247	0.0923955	-0.018852	0.0449399	0.0486841	0.00374419
IRX3					0.291438	0.195669	-0.0957693	0.186174	0.182852	-0.00332242	0.112996	0.0962115	-0.016784	0.192265	0.15663	-0.0356354	0.136594	0.153506	0.0169118
ITGA2		0.0826088	0.0873112	0.00470243	0.913691	0.716741	-0.19695				0.364474	0.268229	-0.0962451	0.0402179	0.0354163	-0.0048016	0.0562216	0.0529618	-0.00325979
ITGA3		0.0366029	0.0350274	-0.00157549	0.860089	0.671896	-0.188194				0.360491	0.273204	-0.0872864	0.263924	0.215173	-0.0487514
ITGA5		0.0370833	0.0313578	-0.00572547				0.0484949	0.0494017	0.000906817	0.31132	0.243658	-0.0676615	0.0984726	0.0895962	-0.00887636	0.0980478	0.111793	0.0137448
ITGB3	up				0.427743	0.356563	-0.0711805				0.370447	0.28829	-0.0821572	0.709103	0.553223	-0.15588	0.265295	0.223936	-0.041359
ITGB6		0.660239	0.47379	-0.186449							0.756544	0.574828	-0.181716	0.770988	0.539435	-0.231553	0.449261	0.345829	-0.103432
ITGBL1		0.934993	0.71861	-0.216382							0.661734	0.503768	-0.157966	0.738177	0.497595	-0.240582	0.927541	0.656437	-0.271104
JAG1		0.0576206	0.0575883	-3.23167e-05	0.910622	0.631988	-0.278634				0.341438	0.261806	-0.079632	0.0498246	0.0439552	-0.00586941	0.0664197	0.0746558	0.00823611
JMY		0.0792454	0.0783879	-0.000857521	0.661631	0.495617	-0.166014				0.714073	0.507868	-0.206205	0.303897	0.236292	-0.0676054	0.0524821	0.0495259	-0.00295623
JUNB	up	0.0573622	0.0542025	-0.00315968	0.115654	0.090304	-0.0253504	0.067573	0.0746	0.00702703				0.126142	0.110344	-0.0157983	0.0327101	0.02772	-0.00499004
JUP		0.0998611	0.0929239	-0.00693712	0.578048	0.455537	-0.122511	0.485787	0.394355	-0.0914318	0.809358	0.638303	-0.171055	0.120271	0.0963921	-0.0238784	0.0822481	0.0685659	-0.0136822
KATNAL1		0.00535402	0.00390945	-0.00144457	0.903094	0.646054	-0.25704	0.160987	0.132647	-0.0283408	0.852529	0.65162	-0.200909	0.368926	0.266607	-0.102319	0.0444424	0.0430736	-0.00136879
KBTBD8					0.100246	0.0899139	-0.0103322	0.795377	0.61817	-0.177207	0.171589	0.131851	-0.0397381	0.298436	0.24334	-0.0550968	0.575553	0.444908	-0.130645
KC6											0.142936	0.117896	-0.0250404
KCNG1					0.405571	0.336253	-0.0693179	0.468472	0.352904	-0.115568	0.595486	0.443982	-0.151503	0.882163	0.664971	-0.217192
KCNH7		0.878078	0.635621	-0.242457	0.331116	0.260354	-0.0707626				0.554863	0.422998	-0.131864	0.621121	0.491879	-0.129242
KCNJ2					0.480578	0.370061	-0.110517	0.565127	0.433722	-0.131405	0.309774	0.238411	-0.0713621	0.748119	0.579131	-0.168988	0.770762	0.565404	-0.205358
KCNK1		0.121814	0.0994042	-0.0224097							0.389642	0.302187	-0.0874542	0.0853446	0.0711057	-0.0142389	0.107124	0.0839785	-0.0231451
KCNMA1		0.90914	0.624919	-0.284221	0.15151	0.117893	-0.0336165				0.515376	0.386711	-0.128665	0.896358	0.693012	-0.203345
KCTD18		0.0655161	0.0651009	-0.000415149	0.891713	0.687496	-0.204217	0.744669	0.596766	-0.147903	0.925459	0.646697	-0.278762	0.0849019	0.0837852	-0.00111676	0.0130646	0.0131464	8.18643e-05
KDELR3		0.066014	0.0633869	-0.00262711	0.917439	0.673686	-0.243754	0.00778109	0.00638188	-0.00139921	0.946461	0.747192	-0.199269	0.57161	0.507146	-0.0644632	0.041979	0.0416999	-0.00027915
KDM1B											0.709025	0.532766	-0.176259	0.0392512	0.0327742	-0.00647696	0.0455801	0.0511196	0.00553954
KDR	up	0.274997	0.246529	-0.0284678	0.914653	0.677384	-0.237269				0.831449	0.600036	-0.231412	0.371147	0.281676	-0.0894708	0.0594662	0.0540407	-0.00542547
KGFLP2											0.413448	0.306828	-0.10662
KIAA0040		0.0710254	0.067883	-0.00314241	0.0606965	0.0619639	0.00126732	0.114523	0.0867011	-0.0278214				0.58765	0.44835	-0.1393	0.148991	0.115946	-0.0330444
KIAA0101		0.055746	0.0490298	-0.00671617							0.0664822	0.0618394	-0.00464283	0.807612	0.640315	-0.167297	0.0319885	0.0334762	0.00148777
KIAA0247					0.617655	0.489582	-0.128073	0.501532	0.374115	-0.127417	0.832942	0.596974	-0.235969	0.310842	0.229098	-0.0817439
KIAA0355					0.878911	0.740416	-0.138495	0.405715	0.298387	-0.107328	0.798825	0.576179	-0.222646	0.490564	0.363826	-0.126738	0.0770236	0.07469	-0.00233366
KIAA1147					0.928621	0.676556	-0.252065				0.626454	0.450395	-0.176059	0.0738697	0.0686326	-0.00523712
KIAA1217		0.0586079	0.0507236	-0.00788423	0.846331	0.64309	-0.203241	0.374818	0.302427	-0.0723905	0.574249	0.436574	-0.137675	0.640303	0.495226	-0.145077	0.784537	0.499093	-0.285443
KIAA1324		0.560509	0.472078	-0.0884312	0.864938	0.655638	-0.2093	0.872618	0.597092	-0.275526	0.458643	0.359366	-0.0992765	0.97812	0.677776	-0.300344	0.552851	0.428007	-0.124843
KIAA1324L		0.100579	0.113958	0.0133792							0.552721	0.40457	-0.148151	0.0608248	0.0619846	0.00115984	0.0163867	0.0102316	-0.00615502
KIAA1524								0.0754313	0.0739894	-0.0014419	0.930633	0.650004	-0.280629	0.0875246	0.0774791	-0.0100455
KIAA1841								0.0369901	0.0378254	0.000835282	0.881168	0.64714	-0.234028	0.0863234	0.0710279	-0.0152956
KIF20A											0.895515	0.599285	-0.29623
KIF5C		0.978884	0.78204	-0.196844	0.803097	0.616019	-0.187079	0.593964	0.419565	-0.174399	0.472957	0.362276	-0.110681	0.592141	0.451872	-0.14027	0.650427	0.53036	-0.120067
KIR2DL3											0.167697	0.137156	-0.0305417	0.0920124	0.0853933	-0.00661916	0.142268	0.123865	-0.0184028
KISS1	up	0.490892	0.413035	-0.0778569	0.560498	0.481343	-0.079155	0.722504	0.565145	-0.15736	0.55957	0.46061	-0.0989602	0.88237	0.646521	-0.235849	0.540788	0.482517	-0.0582712
KIT	up	0.562769	0.481881	-0.0808879				0.948304	0.652184	-0.296121	0.536426	0.393639	-0.142787	0.726673	0.51583	-0.210842
KLF11					0.928178	0.71135	-0.216828				0.718742	0.538139	-0.180603	0.15124	0.138153	-0.0130866	0.0498813	0.0498363	-4.494e-05
KLF15					0.753672	0.515728	-0.237944	0.302162	0.226261	-0.0759013	0.823022	0.583917	-0.239105	0.113002	0.0911936	-0.0218084	0.0225758	0.0258579	0.00328211
KLHL15					0.778871	0.581488	-0.197384	0.35152	0.312686	-0.0388334	0.801602	0.607728	-0.193874	0.794945	0.645016	-0.149929	0.442004	0.322237	-0.119767
KLHL5		0.00286896	0.00586072	0.00299176	0.932106	0.676539	-0.255567	0.655478	0.474852	-0.180626	0.896818	0.591123	-0.305695	0.205595	0.166484	-0.0391112
KRCC1		0.0189149	0.024792	0.00587709				0.29866	0.222145	-0.0765149	0.893855	0.681057	-0.212798	0.436319	0.288873	-0.147445	0.0501561	0.0490676	-0.00108851
KRT10		0.799434	0.564061	-0.235373							0.0404941	0.0412508	0.000756662	0.895819	0.696577	-0.199241
KRT12		0.517863	0.385847	-0.132016	0.807723	0.613707	-0.194016				0.873005	0.638602	-0.234402	0.406051	0.297517	-0.108534	0.917596	0.706952	-0.210645
KRT15		0.656227	0.519892	-0.136335				0.8019	0.574914	-0.226986	0.89066	0.699065	-0.191595	0.876742	0.61485	-0.261892	0.723487	0.533277	-0.19021
KRT19		0.0682228	0.064239	-0.0039838							0.111843	0.0985717	-0.0132714	0.436629	0.338375	-0.0982542	0.0648422	0.0584511	-0.00639112
KRT34	up	0.720527	0.520687	-0.199841	0.109244	0.0876318	-0.0216126				0.923	0.518069	-0.404931	0.785153	0.580583	-0.20457
KRT6A		0.213821	0.188341	-0.0254794	0.0820917	0.0862189	0.0041272				0.703742	0.583225	-0.120517	0.124747	0.10227	-0.0224766	0.161343	0.148492	-0.0128516
KRT75		0.498087	0.427835	-0.0702521	0.323478	0.287971	-0.0355068				0.305013	0.260172	-0.044841	0.378054	0.297139	-0.0809154	0.430259	0.355233	-0.0750264
KRT80		0.0468783	0.0359288	-0.0109495	0.914092	0.676015	-0.238077				0.629451	0.474567	-0.154884	0.504508	0.387407	-0.117101	0.0433931	0.0434124	1.9335e-05
KRT81	up	0.905277	0.676591	-0.228687	0.916803	0.772449	-0.144354				0.895495	0.681818	-0.213677	0.752481	0.583648	-0.168833	0.907187	0.723225	-0.183962
L1CAM		0.068979	0.0576021	-0.0113769	0.527405	0.446192	-0.0812132				0.526017	0.43826	-0.0877573	0.349405	0.325966	-0.0234396	0.275578	0.226202	-0.0493764
LAMA3	down	0.243291	0.187316	-0.0559754							0.310067	0.255126	-0.05494	0.40369	0.306329	-0.0973604	0.664233	0.517668	-0.146565
LAMB3		0.0856294	0.0795563	-0.00607313	0.878102	0.660615	-0.217488	0.0771811	0.0867141	0.00953304	0.76183	0.54926	-0.212571	0.0795925	0.070999	-0.00859349	0.0933509	0.0829349	-0.010416
LAMC2		0.0756261	0.0776581	0.00203203	0.941545	0.790073	-0.151471				0.500699	0.374719	-0.12598	0.594717	0.447955	-0.146762	0.194658	0.149947	-0.0447106
LAMP3	up				0.851398	0.591448	-0.25995	0.505268	0.428149	-0.0771191	0.339179	0.264986	-0.0741934	0.842579	0.535994	-0.306585	0.363148	0.309314	-0.0538339
LATS2					0.912213	0.725246	-0.186967	0.341973	0.263225	-0.0787481	0.87315	0.641316	-0.231834	0.348365	0.305437	-0.0429288	0.0415362	0.0471414	0.00560514
LENG9		0.0880156	0.086852	-0.00116362										0.088763	0.0972529	0.00848991	0.0631008	0.0528699	-0.010231
LEPREL1					0.74341	0.547593	-0.195816	0.651833	0.480565	-0.171269	0.595057	0.449775	-0.145282	0.822496	0.583421	-0.239075	0.928259	0.641295	-0.286964
LETMD1		0.0666068	0.0582122	-0.00839458	0.731223	0.542788	-0.188435	0.117576	0.0954764	-0.0220994	0.450446	0.369081	-0.0813646	0.277511	0.222691	-0.0548199	0.038519	0.041459	0.00294003
LGALS12	down	0.414677	0.359428	-0.0552488	0.315901	0.261926	-0.0539748	0.0899965	0.0857866	-0.00420992	0.464648	0.375526	-0.0891228	0.35074	0.280465	-0.0702744	0.517423	0.426156	-0.0912669
LGALS3		0.0144701	0.0236218	0.00915176				0.211932	0.171031	-0.0409016	0.90835	0.60243	-0.30592	0.611269	0.428752	-0.182517	0.318682	0.206577	-0.112106
LHPP		0.0035555	0.00303415	-0.000521355	0.879367	0.621986	-0.257382				0.678696	0.520888	-0.157808	0.612587	0.486552	-0.126035	0.0555028	0.0534228	-0.00207997
LIMA1					0.845746	0.628905	-0.216841	0.139898	0.112038	-0.0278602	0.468257	0.372845	-0.0954124	0.50603	0.443401	-0.0626287	0.0767605	0.0705525	-0.00620795
LIN28B	up	0.706705	0.566885	-0.13982	0.889582	0.637504	-0.252079				0.759594	0.61386	-0.145733	0.584343	0.397736	-0.186607	0.618163	0.468067	-0.150097
LMNB1		0.100635	0.105934	0.00529964	0.929379	0.640588	-0.288791				0.39383	0.296838	-0.0969919	0.0758936	0.0778243	0.00193063	0.0474426	0.0434019	-0.00404066
LMO4		0.0629818	0.064063	0.0010812	0.936477	0.616559	-0.319919	0.0720418	0.0702793	-0.00176244	0.471522	0.315961	-0.155561	0.634	0.408173	-0.225827	0.0541984	0.0584988	0.00430045
LOC100128288	down										0.29082	0.211834	-0.0789861	0.496378	0.392938	-0.10344	0.934958	0.728349	-0.206609
LOC100130691											0.3017	0.230718	-0.0709825	0.0595003	0.0595031	2.7465e-06	0.013857	0.0103984	-0.00345861
LOC100268168	up										0.106712	0.0917816	-0.0149308
LOC145783											0.20436	0.160064	-0.0442954
LOC283070	down										0.866854	0.603673	-0.263182	0.760789	0.569879	-0.190911	0.855551	0.585606	-0.269945
LOC374443											0.0418547	0.0374943	-0.00436038	0.23353	0.178779	-0.0547514	0.055492	0.0525097	-0.00298234
LOC647859											0.876265	0.586162	-0.290104
LOC650368	up										0.333424	0.258827	-0.0745972				0.679947	0.517746	-0.162201
LOC728554	up										0.341707	0.270475	-0.0712318
LOC730101	up										0.562961	0.387502	-0.17546	0.0435695	0.0530747	0.00950519	0.0487717	0.048462	-0.000309622
LONP1					0.476222	0.404867	-0.0713546				0.840777	0.614036	-0.226741
LONRF3		0.070739	0.0748212	0.00408218	0.912407	0.717569	-0.194839				0.231278	0.180138	-0.0511399	0.619758	0.491482	-0.128276	0.0451702	0.0396551	-0.00551511
LOX		0.0867289	0.0818921	-0.00483678	0.870088	0.681881	-0.188207	0.121769	0.120122	-0.00164702	0.242065	0.184111	-0.0579536	0.125789	0.102522	-0.023267	0.0657466	0.0654116	-0.000334941
LPAR1	down	0.00115352	0	-0.00115352	0.817162	0.560261	-0.256901	0.467252	0.337391	-0.129861	0.836012	0.58933	-0.246682	0.322244	0.263961	-0.0582833
LPCAT2		0.179289	0.147834	-0.0314553	0.41502	0.279966	-0.135054				0.528679	0.387566	-0.141113	0.572627	0.435821	-0.136806	0.650323	0.484877	-0.165446
LPCAT3		0.0754401	0.0779044	0.00246429	0.904673	0.661302	-0.243371				0.604293	0.488907	-0.115386	0.0333004	0.040577	0.00727659	0.0423745	0.0408718	-0.00150265
LRBA		0.0947818	0.0905855	-0.00419635	0.880955	0.679295	-0.20166	0.0893845	0.0831381	-0.00624641	0.862307	0.646185	-0.216122	0.0734739	0.0683216	-0.0051523	0.0458012	0.0492838	0.00348265
LRCH2		0.459989	0.429555	-0.030434							0.375503	0.296953	-0.0785497	0.359738	0.279071	-0.0806672	0.550197	0.429507	-0.12069
LRIG1		0.279425	0.268833	-0.0105918	0.84153	0.593171	-0.24836				0.701455	0.529723	-0.171732	0.0374076	0.0374179	1.03669e-05	0.0515903	0.0503783	-0.00121207
LRP5					0.879319	0.687971	-0.191349				0.80124	0.582464	-0.218776	0.894245	0.698597	-0.195648
LRRC49		0.0644159	0.0602969	-0.00411901	0.552331	0.404383	-0.147948	0.0580577	0.0627123	0.00465461	0.710953	0.534311	-0.176643	0.0617756	0.0610806	-0.000695063	0.0538924	0.0579459	0.00405351
LRRC6											0.281795	0.221133	-0.0606614	0.417504	0.29892	-0.118585	0.162733	0.127331	-0.0354024
LRRN4	up				0.943056	0.694477	-0.248579	0.335374	0.266049	-0.069325	0.581329	0.445822	-0.135507	0.657585	0.457816	-0.199769	0.182489	0.144523	-0.0379655
LRRTM2	up										0.874757	0.6955	-0.179257
LSM3		0.0480207	0.0460437	-0.00197693	0.816749	0.601908	-0.214841				0.35561	0.230212	-0.125398	0.255276	0.194865	-0.060411
LSR	up	0.0430563	0.0476138	0.00455755							0.570886	0.458257	-0.11263	0.105264	0.0857787	-0.0194855	0.0491955	0.0510973	0.00190178
LTBP1		0.0843925	0.0812492	-0.00314327							0.625606	0.46676	-0.158846	0.0600439	0.0565906	-0.00345329	0.0634577	0.0661774	0.00271969
LUM	up	0.315666	0.206508	-0.109158							0.864403	0.638778	-0.225625
LUZP4		0.825013	0.628382	-0.196631	0.84581	0.645128	-0.200682				0.848322	0.658268	-0.190054	0.44821	0.362566	-0.0856441	0.86251	0.639924	-0.222586
LXN		0.0524274	0.0426839	-0.00974352										0.86616	0.635901	-0.230258	0.165417	0.121771	-0.0436456
LY6K	up	0.762624	0.611953	-0.150672	0.599695	0.497399	-0.102295				0.850813	0.69979	-0.151023	0.616669	0.436871	-0.179797	0.0509703	0.0476123	-0.00335796
LYAR		0.0420205	0.0387504	-0.00327019				0.280506	0.228608	-0.0518982	0.604476	0.572735	-0.0317407
LYPD1		0.0827231	0.0820756	-0.000647472				0.784627	0.588343	-0.196283	0.796054	0.614635	-0.181419	0.379175	0.286872	-0.0923037	0.0520227	0.04682	-0.00520268
LYPD5	up	0.416677	0.346247	-0.0704296	0.0754688	0.0601923	-0.0152765	0.452544	0.355819	-0.0967248	0.813521	0.577512	-0.236009	0.504522	0.390014	-0.114508	0.841969	0.609511	-0.232457
MAEL	up							0.96728	0.585103	-0.382177	0.800054	0.597584	-0.20247	0.876221	0.664722	-0.211499	0.92306	0.672363	-0.250696
MAGEB10					0.194759	0.123376	-0.0713826	0.464552	0.391852	-0.0726999	0.117042	0.0968128	-0.0202288	0.592853	0.429409	-0.163444	0.344506	0.26584	-0.0786658
MAGEB2	up	0.550865	0.466727	-0.0841387							0.133898	0.096654	-0.0372444	0.223171	0.164694	-0.0584767	0.717984	0.507489	-0.210495
MAGI3		0.0296652	0.0207764	-0.00888887	0.694089	0.443165	-0.250924				0.624118	0.449096	-0.175022	0.0646004	0.0615892	-0.00301117	0.0635848	0.0642599	0.000675008
MAL2	up	0.219242	0.180372	-0.0388692	0.284366	0.208517	-0.0758498				0.392539	0.327319	-0.0652191	0.113973	0.091505	-0.0224683	0.0422813	0.0419856	-0.00029572
MANSC1		0.201116	0.196824	-0.00429117				0.557581	0.442938	-0.114642	0.482574	0.312062	-0.170512	0.329466	0.284918	-0.0445487	0.0940281	0.0746968	-0.0193312
MAOA		0.150648	0.119693	-0.0309552							0.54548	0.38115	-0.16433	0.228975	0.195807	-0.0331683	0.194748	0.173379	-0.0213687
MAP2K6	down	0.082268	0.0739455	-0.00832249	0.627029	0.43683	-0.190199				0.495838	0.387598	-0.10824	0.526298	0.432266	-0.094032	0.0660991	0.0587409	-0.00735814
MAP3K2											0.915599	0.738413	-0.177186	0.856521	0.665961	-0.19056
MAP3K8	up	0.0560306	0.0547629	-0.00126769				0.0937126	0.0777937	-0.0159189	0.883154	0.682541	-0.200613	0.130179	0.116032	-0.0141467	0.0339736	0.0360022	0.00202859
MAP7	up				0.625605	0.407898	-0.217707	0.0270321	0.0263666	-0.000665485	0.604971	0.450884	-0.154087	0.348714	0.265296	-0.083418	0.203075	0.163756	-0.0393186
MAP7D2					0.492774	0.35899	-0.133784				0.586673	0.435715	-0.150958	0.854122	0.667287	-0.186835	0.903638	0.608127	-0.295511
MAP9					0.860299	0.631745	-0.228554	0.0357557	0.0368768	0.00112117	0.916036	0.605015	-0.311021	0.418663	0.246648	-0.172015	0.155352	0.121779	-0.0335737
MARCKS		0.0777227	0.0831906	0.00546786	0.721591	0.464201	-0.25739				0.382675	0.284274	-0.0984005	0.542935	0.392323	-0.150612	0.0512759	0.0447421	-0.00653375
MARS		0.0202927	0.016176	-0.00411671							0.591024	0.442137	-0.148887	0.80863	0.646239	-0.162391	0.0719832	0.0749148	0.00293164
MARVELD2								0.427745	0.349236	-0.0785089	0.916308	0.684541	-0.231766				0.413095	0.358168	-0.0549271
MBD5	down	0.810418	0.591088	-0.219329	0.932171	0.719509	-0.212663				0.168349	0.102414	-0.0659349	0.794089	0.531502	-0.262587	0.862853	0.676171	-0.186682
MBNL3		0.00923084	0.0128465	0.00361564	0.777332	0.585693	-0.19164	0.356181	0.260341	-0.0958406	0.83276	0.631232	-0.201529	0.443689	0.320285	-0.123404	0.0891997	0.0775489	-0.0116508
MBOAT2					0.787594	0.634855	-0.152739	0.071545	0.0820191	0.010474	0.603811	0.475825	-0.127986	0.0451426	0.0389825	-0.00616009	0.182768	0.185545	0.00277746
MBOAT7					0.656367	0.525802	-0.130565	0.0205831	0.0210376	0.000454478	0.81451	0.620555	-0.193955	0.0440728	0.0443171	0.000244356	0.0269151	0.0269595	4.44188e-05
MCAM	up	0.539969	0.4783	-0.0616691	0.902101	0.639581	-0.26252				0.681626	0.497427	-0.184199	0.538116	0.409169	-0.128947	0.312107	0.284851	-0.027256
MCL1		0.055942	0.0568432	0.000901188	0.195031	0.182943	-0.0120872				0.0485234	0.0555626	0.00703927	0.119162	0.103745	-0.0154168	0.0145153	0.0242478	0.00973255
MCM10					0.886198	0.700735	-0.185463	0.116087	0.0915999	-0.024487	0.8624	0.587714	-0.274685	0.134656	0.135555	0.000898217	0.0456509	0.041993	-0.00365786
MCM3		0.0437807	0.0388976	-0.00488309	0.313304	0.214096	-0.0992083				0.924891	0.674908	-0.249982	0.346176	0.260905	-0.0852716	0.0525065	0.0515118	-0.000994753
MCM4		0.0212581	0.0211221	-0.000136057	0.77329	0.56817	-0.20512				0.240289	0.205747	-0.0345418	0.0492296	0.047507	-0.0017226	0.0317379	0.0315927	-0.000145178
MCM6		0.00600672	0.00970438	0.00369767							0.428577	0.29699	-0.131587	0.172915	0.107851	-0.0650641	0.0369359	0.0370066	7.0732e-05
MDGA2					0.266312	0.221858	-0.0444536	0.45909	0.408904	-0.0501859	0.240844	0.2104	-0.0304447	0.602667	0.488848	-0.113819
MDM4		0.0971863	0.101836	0.00464932	0.87539	0.669604	-0.205787				0.475459	0.374447	-0.101012	0.617863	0.459764	-0.158099	0.0778926	0.0772367	-0.000655903
ME3					0.927952	0.699192	-0.228759	0.0566918	0.0560447	-0.000647074	0.690456	0.537502	-0.152953	0.240757	0.192381	-0.0483764	0.066292	0.0650547	-0.0012373
MEGF9					0.875266	0.733957	-0.14131				0.301947	0.219031	-0.0829164	0.277885	0.24264	-0.0352445	0.088174	0.0991737	0.0109997
MET		0.0728872	0.0694111	-0.00347603	0.897358	0.665392	-0.231966	0.348374	0.259494	-0.0888796	0.713752	0.537868	-0.175884	0.0515367	0.0504408	-0.00109587	0.00920537	0.00732773	-0.00187764
METTL7A		0.329958	0.273625	-0.0563325				0.0443524	0.042147	-0.00220544	0.799009	0.570445	-0.228564	0.418631	0.31995	-0.098681	0.0698072	0.0685521	-0.0012551
MFAP2								0.341469	0.242333	-0.0991359	0.882947	0.632332	-0.250615	0.363155	0.288108	-0.0750466
MFGE8		0.0513475	0.0486292	-0.0027183	0.922637	0.618954	-0.303683				0.507014	0.360169	-0.146844	0.467362	0.357226	-0.110136	0.0348416	0.0323745	-0.00246711
MGP		0.281315	0.222267	-0.0590488							0.455575	0.28808	-0.167494	0.596006	0.462001	-0.134005	0.727438	0.544554	-0.182884
MGST2		0.0663942	0.0655058	-0.000888406							0.702884	0.543293	-0.159591	0.582079	0.428667	-0.153412	0.184728	0.139387	-0.045341
MIA2	up							0.327103	0.24175	-0.0853531	0.874207	0.705919	-0.168288	0.892076	0.635803	-0.256273	0.585484	0.510905	-0.0745783
MICA		0.0264745	0.0365185	0.0100439	0.695553	0.448949	-0.246604				0.537618	0.394982	-0.142636	0.114842	0.0991631	-0.0156786	0.0591766	0.0553087	-0.00386795
MICB		0.0600256	0.0546998	-0.00532572	0.753676	0.609189	-0.144486	0.0429061	0.0446583	0.00175214	0.706714	0.542285	-0.164429	0.237548	0.193353	-0.0441952	0.114744	0.118292	0.00354744
MIF4GD					0.881199	0.651485	-0.229714	0.0698461	0.0707189	0.000872757	0.142937	0.102098	-0.0408383	0.315819	0.241319	-0.0745002	0.0078868	0.00594764	-0.00193917
MIR1292														0.0304384	0.0283896	-0.00204876
MIR181B1											0.91213	0.688617	-0.223513				0.909401	0.688639	-0.220762
MIR30C2														0.814732	0.502901	-0.31183	0.909221	0.683601	-0.22562
MIR614														0.872844	0.698553	-0.174291	0.804628	0.604961	-0.199667
MITF		0.240035	0.16829	-0.0717445	0.910571	0.794033	-0.116538				0.637015	0.464252	-0.172763	0.494198	0.367666	-0.126532	0.492142	0.354537	-0.137605
MKL2	down				0.906605	0.727885	-0.17872	0.613086	0.470961	-0.142126	0.878142	0.613306	-0.264836	0.385306	0.27625	-0.109056	0.0253249	0.0246091	-0.000715792
MKNK1											0.758351	0.570885	-0.187466	0.283363	0.22239	-0.0609733	0.00844976	0.00874004	0.000290283
MKX		0.708697	0.573347	-0.13535				0.40664	0.300295	-0.106345	0.458867	0.31152	-0.147347	0.865001	0.64061	-0.224391	0.701027	0.563187	-0.137839
MLLT11	up				0.691358	0.513861	-0.177497	0.30197	0.253675	-0.0482947	0.913553	0.69799	-0.215564
MMAB		0.0321742	0.0336663	0.00149214	0.833269	0.645225	-0.188045				0.850335	0.545591	-0.304744				0.0544258	0.0531827	-0.00124302
MMP1	up										0.573636	0.430616	-0.14302	0.722739	0.571865	-0.150873	0.321329	0.211926	-0.109402
MMP13	up	0.576638	0.468497	-0.10814	0.328814	0.219975	-0.108838				0.741707	0.564684	-0.177024	0.527038	0.405306	-0.121732	0.708018	0.546264	-0.161754
MMP3	up	0.425499	0.301766	-0.123733	0.172335	0.130889	-0.0414461				0.668737	0.521743	-0.146995	0.222255	0.157974	-0.0642805	0.257921	0.191937	-0.0659845
MMP8	up				0.106624	0.0845637	-0.0220601				0.649062	0.525749	-0.123314
MOCOS											0.330469	0.242165	-0.0883042	0.49918	0.381795	-0.117385	0.0530946	0.0553076	0.00221303
MOSPD1					0.886323	0.737941	-0.148382	0.197582	0.164981	-0.0326004	0.911039	0.699902	-0.211136	0.359565	0.314446	-0.045119	0.0840913	0.076472	-0.00761935
MRPS12					0.810098	0.578575	-0.231522	0.0685551	0.0689172	0.000362188	0.496762	0.372621	-0.124141	0.0907122	0.0851118	-0.00560039	0.0205811	0.0231051	0.00252397
MSH2		0.0358174	0.0343966	-0.00142083				0.0423702	0.0459314	0.00356115	0.333807	0.274174	-0.0596324	0.0614293	0.0602444	-0.00118493	0.047089	0.0521022	0.00501323
MSH4	up	0.943146	0.616281	-0.326865							0.733469	0.54092	-0.19255	0.799616	0.545122	-0.254494	0.902294	0.638146	-0.264148
MSH6		0.00883026	0.00816081	-0.000669445							0.618029	0.490852	-0.127177	0.0985351	0.0838603	-0.0146748	0.0369478	0.0375733	0.000625492
MT1A		0.670259	0.575527	-0.0947315							0.627655	0.481782	-0.145873	0.599692	0.49839	-0.101302	0.328913	0.265407	-0.0635064
MT1F	up	0.677651	0.576999	-0.100652							0.355042	0.286756	-0.0682854	0.0610947	0.0621223	0.00102762	0.170408	0.142214	-0.0281939
MT1G		0.930382	0.772855	-0.157527							0.62141	0.544962	-0.0764481	0.382283	0.31438	-0.0679033	0.889529	0.655728	-0.233802
MT1L	up										0.918358	0.719721	-0.198637	0.825805	0.613501	-0.212304	0.798312	0.598447	-0.199864
MTHFD1L	down	0.0619728	0.0678538	0.00588096	0.928795	0.732238	-0.196558				0.774279	0.563231	-0.211048	0.413864	0.326413	-0.0874512	0.16252	0.123625	-0.0388943
MTHFD2											0.458885	0.396357	-0.0625287	0.890741	0.609296	-0.281445	0.610723	0.504708	-0.106015
MTMR7					0.890091	0.678982	-0.211109	0.773488	0.529801	-0.243687	0.577403	0.438334	-0.139069	0.781671	0.61122	-0.170451	0.850843	0.686967	-0.163876
MUC1					0.673666	0.603348	-0.070318				0.32752	0.272133	-0.0553863	0.0940101	0.0886472	-0.00536293	0.322643	0.261932	-0.060711
MUC13					0.158692	0.120084	-0.0386078				0.156496	0.138662	-0.0178344	0.626419	0.520156	-0.106263	0.741778	0.58974	-0.152038
MUC15		0.0752877	0.0766544	0.00136672	0.0447822	0.0475786	0.00279644	0.169626	0.126138	-0.0434875				0.0690066	0.0666024	-0.0024042	0.0407251	0.0506447	0.00991958
MXD1		0.0604128	0.0520887	-0.0083241	0.914471	0.695448	-0.219022				0.652475	0.4843	-0.168175	0.0755128	0.0819633	0.00645046	0.0330221	0.0355821	0.00256006
MYB					0.753604	0.499392	-0.254212	0.0250095	0.029212	0.00420254	0.33344	0.272898	-0.0605428	0.0521164	0.052629	0.000512604	0.100423	0.114179	0.0137558
MYBL1					0.922777	0.781835	-0.140941	0.0630597	0.069052	0.00599226	0.794763	0.605305	-0.189458	0.0427937	0.0419411	-0.000852587	0.0436535	0.0456605	0.00200704
MYEF2		0.140914	0.137459	-0.00345543				0.0380932	0.0234095	-0.0146838	0.434647	0.307207	-0.12744	0.872738	0.67883	-0.193908	0.449008	0.31749	-0.131518
MYH14					0.593576	0.459473	-0.134102	0.23905	0.19621	-0.0428397	0.369508	0.30536	-0.0641489	0.433612	0.343278	-0.0903337	0.26377	0.233603	-0.030167
MYH3								0.839526	0.581377	-0.258149	0.877871	0.656091	-0.22178	0.88318	0.653578	-0.229603	0.915671	0.686262	-0.22941
MYLK4		0.306485	0.253415	-0.0530698	0.412536	0.329114	-0.0834218	0.421541	0.318974	-0.102567	0.663206	0.4735	-0.189706	0.710284	0.535041	-0.175243	0.695684	0.529225	-0.16646
NAA11	up	0.468146	0.366519	-0.101627	0.413557	0.290924	-0.122633							0.552854	0.481354	-0.0714997	0.829861	0.611048	-0.218814
NAA38		0.0599839	0.0624652	0.00248132	0.634976	0.41162	-0.223356				0.0326013	0.0246962	-0.00790506	0.0475234	0.0354746	-0.0120488	0.0248225	0.0280335	0.00321101
NAALADL2											0.516121	0.397945	-0.118176
NALCN					0.168602	0.117653	-0.0509485	0.801409	0.617106	-0.184302	0.705025	0.541845	-0.16318	0.0567617	0.0471226	-0.00963919	0.135465	0.120004	-0.0154612
NAV3		0.817022	0.621354	-0.195668	0.904784	0.704811	-0.199973				0.737838	0.528008	-0.20983	0.386035	0.297796	-0.0882398
NBR1					0.0780509	0.0870544	0.0090035	0.135642	0.103182	-0.0324599	0.914739	0.595363	-0.319376	0.0548229	0.0556369	0.000814006
NCAM2								0.0562753	0.0497321	-0.00654324	0.267652	0.186898	-0.0807533	0.198942	0.153845	-0.0450964	0.00903154	0.00714033	-0.0018912
NCAPG					0.918855	0.600697	-0.318157	0.0276058	0.0332544	0.00564867	0.143481	0.108496	-0.0349853	0.124811	0.0989659	-0.0258452	0.012853	0.0147492	0.00189619
NCKAP5		0.268311	0.223095	-0.0452153				0.378251	0.303441	-0.0748102	0.265133	0.208856	-0.0562766	0.260458	0.20544	-0.0550177	0.294217	0.21407	-0.0801465
NCOA7								0.198874	0.156288	-0.042586	0.234859	0.186111	-0.0487482	0.435715	0.277395	-0.15832
NDE1		0.049089	0.0510192	0.00193019	0.926091	0.728937	-0.197154	0.240458	0.190859	-0.049599	0.678964	0.52172	-0.157244	0.063346	0.0574596	-0.00588646	0.0316834	0.0302626	-0.00142077
NDRG3	down				0.827753	0.644882	-0.182871	0.395667	0.316507	-0.0791595	0.856829	0.645797	-0.211031	0.153427	0.130332	-0.0230948	0.0526175	0.0569316	0.00431414
NDUFA2		0.0702376	0.070741	0.000503415							0.0373836	0.0378879	0.000504257				0.0495273	0.0585495	0.00902214
NDUFB3								0.286143	0.26411	-0.0220333				0.0612964	0.0648534	0.003557	0.0517244	0.0522462	0.000521786
NEAT1											0.0623629	0.0592496	-0.00311332	0.0711357	0.0699051	-0.00123058	0.0656009	0.0638242	-0.0017767
NEIL3		0.0716202	0.0654981	-0.00612214	0.941482	0.701793	-0.239688	0.0691332	0.07277	0.00363681	0.719239	0.536694	-0.182544	0.396859	0.287014	-0.109845	0.0463785	0.0453082	-0.00107031
NEO1					0.628642	0.466056	-0.162586				0.510567	0.383927	-0.12664	0.113898	0.0847863	-0.0291114	0.0988031	0.0883832	-0.0104199
NETO2	up				0.780852	0.605144	-0.175708	0.928972	0.47653	-0.452443	0.450075	0.300678	-0.149398	0.496285	0.410169	-0.0861155	0.42334	0.205456	-0.217884
NEXN					0.865121	0.579873	-0.285248	0.27225	0.211669	-0.0605819	0.931313	0.855051	-0.0762623	0.92496	0.68353	-0.24143	0.0478515	0.0551855	0.00733401
NFE2L1					0.757116	0.60475	-0.152366	0.041906	0.0445175	0.00261141	0.922681	0.688585	-0.234096	0.193358	0.153391	-0.0399671	0.060173	0.0599339	-0.000239103
NFIA	down	0.077469	0.0771925	-0.000276539	0.909162	0.642676	-0.266486				0.474348	0.367159	-0.10719	0.0509349	0.0516402	0.000705342	0.0456737	0.0449817	-0.00069194
NFKB1					0.882365	0.616398	-0.265968	0.169417	0.124449	-0.0449678	0.884753	0.640411	-0.244342	0.27028	0.197755	-0.0725249	0.0875452	0.0875286	-1.65733e-05
NFKBIE	up	0.0892813	0.0926002	0.00331891							0.452467	0.317953	-0.134514	0.751235	0.532679	-0.218556
NFKBIZ		0.0656262	0.0673341	0.00170793	0.826384	0.76366	-0.0627234	0.166502	0.139175	-0.0273273	0.895852	0.69084	-0.205012
NGF								0.550309	0.39664	-0.153668	0.896793	0.665381	-0.231412	0.861634	0.616451	-0.245183	0.14776	0.11967	-0.0280901
NKAPL	up	0.872978	0.61364	-0.259338				0.984852	0.710697	-0.274154				0.497181	0.357754	-0.139427	0.911273	0.60988	-0.301393
NLRP10	up	0.371815	0.306059	-0.065756							0.419553	0.343112	-0.0764407	0.512397	0.371136	-0.14126	0.652006	0.484001	-0.168005
NNAT	up	0.966802	0.566128	-0.400674				0.9838	0.651256	-0.332544
NOC3L		0.0659677	0.0714735	0.0055058							0.0577887	0.0517954	-0.0059933	0.176604	0.132281	-0.0443232
NOTCH3		0.200076	0.169464	-0.0306113	0.156653	0.133215	-0.0234387				0.61341	0.486764	-0.126646	0.389481	0.286002	-0.103479	0.124803	0.0964186	-0.0283849
NPFFR2		0.35805	0.292825	-0.0652247	0.919226	0.749461	-0.169764				0.316494	0.22938	-0.0871142	0.724719	0.548329	-0.17639
NPM3		0.0574706	0.0497569	-0.00771367	0.101006	0.0894912	-0.0115153				0.484579	0.328049	-0.15653	0.573678	0.367185	-0.206493	0.0293254	0.0329523	0.0036269
NPNT		0.139727	0.121283	-0.0184447	0.423212	0.307269	-0.115943				0.400071	0.290825	-0.109245	0.177025	0.14678	-0.0302442	0.0697699	0.0630417	-0.00672819
NPPC											0.211908	0.198597	-0.0133108	0.767668	0.556579	-0.211089	0.104491	0.0928797	-0.011611
NPR3		0.93912	0.601949	-0.337171	0.492905	0.302573	-0.190332	0.982964	0.711906	-0.271058	0.660456	0.476639	-0.183817	0.140257	0.10463	-0.0356266	0.475291	0.348077	-0.127214
NR1D1		0.0795244	0.0857254	0.00620105	0.895281	0.791845	-0.103436				0.262705	0.212474	-0.0502307	0.0561729	0.0548203	-0.00135262	0.0301716	0.0286792	-0.00149244
NR2F2								0.226437	0.208638	-0.0177987	0.0832481	0.0819143	-0.00133374	0.108735	0.0972152	-0.01152	0.0602997	0.0608446	0.000544899
NRG1		0.359178	0.29969	-0.059488	0.847785	0.651182	-0.196603	0.985655	0.814181	-0.171474	0.653037	0.504328	-0.14871	0.418084	0.320689	-0.0973951	0.903557	0.761639	-0.141918
NRIP3	up				0.905533	0.700517	-0.205016	0.937115	0.623366	-0.313749	0.452065	0.353193	-0.0988718	0.846656	0.630469	-0.216187	0.967452	0.624751	-0.342701
NRN1	up				0.790232	0.449495	-0.340737	0.863603	0.634423	-0.22918	0.637791	0.480869	-0.156922	0.540279	0.36433	-0.175949	0.940317	0.620943	-0.319374
NRP1		0.0635924	0.0748484	0.0112559	0.933243	0.724492	-0.208751				0.722964	0.545731	-0.177233	0.0389345	0.0379916	-0.000942833	0.0595103	0.0611344	0.00162412
NSDHL					0.916739	0.698575	-0.218165	0.216905	0.168294	-0.0486106	0.927701	0.743907	-0.183794	0.608591	0.468488	-0.140103	0.03006	0.0280839	-0.00197612
NUAK1		0.10374	0.0936547	-0.0100858	0.829431	0.591208	-0.238223	0.062357	0.0600847	-0.00227231	0.757895	0.54207	-0.215825	0.56548	0.365919	-0.199561	0.0617538	0.0545854	-0.00716849
NUAK2	up	0.074108	0.0778825	0.00377447	0.36949	0.278348	-0.0911424				0.3595	0.286705	-0.0727949	0.824016	0.646293	-0.177723	0.0857555	0.0886363	0.00288077
NUCKS1					0.910479	0.599291	-0.311188	0.026179	0.0263143	0.000135347	0.593744	0.446806	-0.146939	0.537445	0.399113	-0.138332	0.151947	0.120335	-0.0316122
NUDT3	down							0.050318	0.0506716	0.00035361	0.706369	0.539814	-0.166555	0.365753	0.302543	-0.0632096	0.00895473	0.0128495	0.00389473
NUMB					0.895568	0.69257	-0.202999	0.21394	0.163756	-0.0501834	0.896609	0.66948	-0.227129	0.326768	0.283422	-0.0433466	0.068743	0.0740183	0.00527525
NUP62CL								0.225519	0.164517	-0.0610013	0.690038	0.622311	-0.0677271
NUPR1		0.561082	0.456597	-0.104485	0.557377	0.443336	-0.114041	0.472553	0.39541	-0.0771431	0.602368	0.509606	-0.0927619	0.632376	0.457359	-0.175016	0.58205	0.48331	-0.0987394
NXT2	up							0.900512	0.589063	-0.311449	0.0373735	0.0367177	-0.000655867	0.900625	0.614768	-0.285857	0.888223	0.566897	-0.321325
NYNRIN		0.173723	0.130311	-0.0434124	0.281192	0.231375	-0.049817				0.180081	0.153532	-0.0265492	0.519457	0.410815	-0.108642	0.332461	0.282176	-0.0502855
OCLN								0.240564	0.202556	-0.0380082	0.828304	0.739146	-0.0891581	0.287052	0.213627	-0.0734251	0.190952	0.148616	-0.0423366
ODC1					0.929444	0.658601	-0.270843	0.0724438	0.0764874	0.00404356	0.873151	0.604692	-0.268459	0.091138	0.0836583	-0.00747972	0.0149234	0.0137641	-0.00115927
OIP5											0.550796	0.390872	-0.159924
OLFML3		0.102959	0.0775729	-0.0253862	0.878681	0.637011	-0.24167				0.894795	0.593487	-0.301308	0.500647	0.381343	-0.119303	0.166363	0.124907	-0.0414559
OLR1	up										0.852943	0.599245	-0.253699	0.633088	0.430121	-0.202967	0.732551	0.549132	-0.183419
OMA1								0.123838	0.0945202	-0.0293182	0.849212	0.667577	-0.181635	0.319346	0.231898	-0.0874477	0.0810608	0.0866558	0.00559501
OPN3		0.0670022	0.0620327	-0.00496943				0.0579127	0.0602115	0.00229888	0.285323	0.216569	-0.0687536	0.455677	0.345423	-0.110254	0.0179948	0.0251719	0.00717712
ORAI3	down	0.0507833	0.0533965	0.00261319							0.159307	0.145067	-0.0142397				0.0285567	0.0266428	-0.00191386
OSBPL6								0.552017	0.399425	-0.152591	0.154707	0.117888	-0.036819	0.386227	0.286718	-0.0995087	0.916503	0.736995	-0.179508
OSR2								0.60644	0.451572	-0.154868	0.893652	0.658171	-0.23548	0.126133	0.0977161	-0.0284171	0.0582313	0.060012	0.00178065
OTUD6A		0.557941	0.457448	-0.100493										0.362372	0.272723	-0.0896489	0.441918	0.335764	-0.106154
OXGR1					0.420004	0.333268	-0.0867358	0.373032	0.28193	-0.0911019	0.548601	0.434699	-0.113902	0.48452	0.394092	-0.0904277	0.741133	0.576299	-0.164833
OXTR		0.394148	0.348511	-0.0456374				0.827617	0.632937	-0.19468	0.855197	0.580624	-0.274573	0.796604	0.583782	-0.212822	0.244694	0.187248	-0.057446
P2RY2		0.0361887	0.0345412	-0.00164744	0.420639	0.331114	-0.0895255	0.561498	0.418592	-0.142906	0.888755	0.569652	-0.319103	0.08156	0.0701407	-0.0114193	0.0404295	0.0442026	0.00377307
PADI2		0.437275	0.377816	-0.0594591	0.172054	0.146358	-0.0256964	0.45781	0.439186	-0.0186235	0.358896	0.288689	-0.0702068	0.554966	0.474974	-0.0799916	0.499398	0.468106	-0.0312922
PADI3								0.8355	0.642722	-0.192777	0.244466	0.203789	-0.0406766	0.792488	0.652888	-0.1396	0.680237	0.537113	-0.143125
PAGE2B	up	0.822436	0.615713	-0.206722				0.64961	0.55352	-0.0960897	0.0951045	0.0759248	-0.0191797	0.345829	0.261086	-0.0847421	0.74389	0.566259	-0.177631
PAGE5								0.448929	0.337271	-0.111658	0.0303787	0.0255392	-0.00483947	0.222415	0.175128	-0.047287	0.54251	0.46002	-0.0824905
PALMD		0.308162	0.226461	-0.0817009							0.266631	0.199099	-0.0675325	0.85996	0.599166	-0.260794
PAN2	down	0.038138	0.0454255	0.0072875	0.256463	0.210018	-0.0464443	0.0910053	0.0796802	-0.0113251	0.89491	0.718114	-0.176796	0.225483	0.179028	-0.0464549
PAPSS2		0.0948799	0.0886675	-0.0062124							0.595581	0.439722	-0.155859	0.619221	0.414701	-0.20452	0.0515099	0.04736	-0.00414998
PARP8		0.0888413	0.080376	-0.00846526							0.346662	0.261008	-0.0856535	0.214124	0.147458	-0.066666	0.0556464	0.0576867	0.00204037
PAX7					0.507055	0.434169	-0.072886	0.959747	0.693866	-0.265881	0.37629	0.299166	-0.0771237	0.771161	0.61547	-0.155692	0.652651	0.535393	-0.117258
PBX1		0.218804	0.178368	-0.0404366	0.394339	0.320042	-0.074297				0.459343	0.348357	-0.110986	0.104227	0.0909369	-0.0132899	0.0812619	0.0707951	-0.0104668
PC					0.89495	0.666302	-0.228647	0.640541	0.482023	-0.158518	0.864644	0.635768	-0.228877	0.275949	0.207547	-0.068402	0.0348012	0.0288396	-0.00596157
PCCA		0.0252512	0.027735	0.00248376	0.936656	0.694671	-0.241985				0.826565	0.614655	-0.21191	0.0508126	0.048748	-0.00206458	0.0374388	0.0405982	0.00315948
PCDH7		0.661348	0.448572	-0.212776	0.417914	0.286702	-0.131212				0.434343	0.331965	-0.102378	0.0823085	0.0822064	-0.000102055	0.0534615	0.0512751	-0.00218644
PCDHB13	down	0.724012	0.539616	-0.184397	0.709408	0.565169	-0.144239							0.198226	0.191686	-0.00654023	0.0733454	0.0663561	-0.00698931
PCDHB14	down	0.709431	0.527954	-0.181477	0.787713	0.602722	-0.184991							0.700257	0.46844	-0.231818	0.635769	0.46812	-0.167649
PCDHB4		0.516863	0.397399	-0.119464										0.397585	0.30736	-0.0902254	0.449557	0.328315	-0.121242
PCK2		0.0496805	0.0453761	-0.00430446							0.307017	0.232456	-0.074561	0.581919	0.433702	-0.148217	0.0514575	0.0506658	-0.000791721
PCNA		0.033705	0.0448883	0.0111833				0.585532	0.397544	-0.187988	0.421712	0.294791	-0.12692	0.0494382	0.0518667	0.00242851	0.0398279	0.0395393	-0.000288591
PCYOX1		0.056147	0.0530407	-0.00310631	0.921589	0.692806	-0.228783				0.52233	0.428462	-0.0938678	0.221437	0.167729	-0.0537083	0.0357611	0.029568	-0.00619309
PDE7B	down	0.0819993	0.0751574	-0.00684184	0.941993	0.730021	-0.211972				0.739507	0.558272	-0.181236	0.7019	0.469156	-0.232744	0.0507989	0.0518187	0.00101981
PDE9A					0.836947	0.58472	-0.252226	0.0856398	0.0752527	-0.0103871	0.644958	0.505456	-0.139502	0.771896	0.584198	-0.187697
PDGFRL		0.0794881	0.0681894	-0.0112986	0.836711	0.684894	-0.151817	0.091718	0.0970534	0.00533538	0.37945	0.284037	-0.0954126	0.446556	0.337849	-0.108707	0.0964123	0.0886291	-0.0077832
PDPN		0.483601	0.368094	-0.115507	0.0934792	0.0863123	-0.00716683	0.0878166	0.0797717	-0.00804495	0.145029	0.147549	0.0025204	0.231604	0.177339	-0.0542644	0.142816	0.126243	-0.0165738
PDSS2		0.0341673	0.0334914	-0.000675976							0.670128	0.491129	-0.179	0.158364	0.124503	-0.0338609	0.0305228	0.0296973	-0.000825507
PDZK1								0.889662	0.649141	-0.240521	0.929305	0.794742	-0.134562	0.795272	0.585878	-0.209394	0.895679	0.65726	-0.238419
PEA15					0.875416	0.588819	-0.286596	0.201079	0.165932	-0.0351469	0.922291	0.631206	-0.291086	0.8784	0.641286	-0.237115
PEX11A											0.872928	0.622136	-0.250792	0.481217	0.393835	-0.0873821	0.0812821	0.0726431	-0.00863901
PEX11B											0.303061	0.257387	-0.0456743
PEX3					0.904089	0.736074	-0.168015	0.0817857	0.0784055	-0.00338018	0.742844	0.51706	-0.225784
PGM2L1	up				0.882677	0.684754	-0.197923	0.0700207	0.0747076	0.00468695	0.515922	0.386607	-0.129315	0.0770651	0.0643826	-0.0126825	0.0487212	0.0412116	-0.00750962
PGM5					0.309745	0.239954	-0.0697914				0.0426597	0.0447398	0.00208005
PHF21A					0.628697	0.460909	-0.167788	0.198933	0.150802	-0.0481312	0.804893	0.581725	-0.223168	0.0778422	0.0794565	0.0016143	0.0297264	0.0258802	-0.00384618
PHGDH		0.443802	0.399305	-0.0444972	0.12223	0.10984	-0.01239				0.498664	0.397449	-0.101215	0.186877	0.125477	-0.0614	0.147587	0.106818	-0.040769
PHKA1		0.131385	0.124078	-0.00730637	0.896041	0.675223	-0.220818	0.211747	0.203173	-0.008574	0.491496	0.411083	-0.0804129	0.0975167	0.0863499	-0.0111667	0.0649387	0.0568639	-0.00807481
PHLDA1		0.056814	0.0653294	0.0085154	0.0643274	0.068888	0.0045606							0.054643	0.051142	-0.00350104	0.0608438	0.0682379	0.00739403
PI3					0.0736571	0.0745425	0.000885423				0.353726	0.307914	-0.0458117	0.137053	0.126362	-0.0106908	0.118617	0.112944	-0.00567273
PI4K2B		0.0747807	0.0739896	-0.000791107							0.529359	0.44168	-0.0876792	0.0565695	0.0527165	-0.00385294	0.058894	0.0470867	-0.0118072
PID1					0.688669	0.535786	-0.152883	0.189885	0.145121	-0.0447646	0.755322	0.587724	-0.167598	0.904895	0.683273	-0.221621	0.0819014	0.0613064	-0.020595
PIGU	down	0.120601	0.10619	-0.0144117	0.865399	0.57028	-0.295119				0.613722	0.478895	-0.134827	0.630526	0.483368	-0.147158	0.0475922	0.0445516	-0.00304058
PIGW								0.0541651	0.0408848	-0.0132803	0.917866	0.700766	-0.2171				0.00268386	0.00524427	0.0025604
PIK3AP1					0.298978	0.225202	-0.0737756				0.604679	0.478795	-0.125884	0.471231	0.354393	-0.116838	0.103603	0.0894913	-0.0141121
PIK3CG	up				0.137958	0.100447	-0.0375114	0.46405	0.347519	-0.116531	0.861282	0.644249	-0.217033	0.56194	0.399959	-0.161981	0.804	0.607666	-0.196333
PIK3R1		0.890268	0.616875	-0.273393	0.898543	0.642319	-0.256224				0.477638	0.337171	-0.140467	0.596718	0.381778	-0.21494	0.892555	0.591495	-0.301059
PIM1					0.787594	0.548773	-0.238821	0.0312978	0.0310235	-0.000274334	0.0580186	0.0583136	0.000295015	0.0571545	0.0571658	1.12363e-05	0.0660862	0.0643303	-0.00175589
PITPNC1					0.629	0.441478	-0.187522	0.0394297	0.0444849	0.00505517	0.590953	0.450369	-0.140585	0.21386	0.161223	-0.0526372	0.0445363	0.0422375	-0.00229882
PIWIL2	up				0.88588	0.683648	-0.202232	0.899149	0.721995	-0.177154	0.424412	0.327984	-0.0964283	0.380943	0.284007	-0.0969363	0.884729	0.67543	-0.209299
PIWIL4	up	0.921874	0.648751	-0.273123							0.293402	0.21306	-0.0803421	0.687341	0.493065	-0.194276
PKN3		0.0422311	0.0511007	0.00886959							0.721549	0.552561	-0.168988	0.809711	0.596533	-0.213178	0.101842	0.103352	0.0015105
PKP2		0.320808	0.300178	-0.0206295	0.889648	0.752663	-0.136985				0.658678	0.511625	-0.147052	0.0755064	0.0752585	-0.000247875
PLA2G7	up	0.985445	0.69063	-0.294815				0.714091	0.511446	-0.202645	0.598495	0.471931	-0.126564	0.779569	0.560879	-0.21869	0.855459	0.670276	-0.185183
PLAC8		0.0607223	0.0669018	0.00617948	0.933803	0.749511	-0.184291	0.0779898	0.0715999	-0.0063899	0.891795	0.672695	-0.219099	0.446548	0.399319	-0.0472288	0.0432787	0.0442926	0.00101393
PLAGL1	up	0.718597	0.507239	-0.211358	0.882324	0.638497	-0.243827	0.429366	0.3254	-0.103965	0.484796	0.340004	-0.144792	0.839571	0.608491	-0.231079	0.130311	0.103221	-0.0270904
PLAT	up				0.955985	0.659076	-0.296909	0.073846	0.0743433	0.000497212	0.873512	0.639122	-0.23439	0.893139	0.708292	-0.184847	0.0964986	0.0896987	-0.00679994
PLAUR								0.0329902	0.0342241	0.0012339	0.395326	0.317508	-0.0778178	0.0888306	0.0815932	-0.00723743	0.0642721	0.0644176	0.000145543
PLCB4	up				0.810069	0.624839	-0.18523	0.235419	0.181947	-0.0534717	0.0715241	0.0740072	0.00248316	0.130676	0.101285	-0.0293912
PLCG2					0.716559	0.575796	-0.140763	0.487164	0.383045	-0.104119	0.764024	0.587565	-0.176459	0.0840729	0.071313	-0.0127599	0.0591505	0.0723826	0.013232
PLCH1					0.203586	0.161363	-0.042223	0.564828	0.439346	-0.125483	0.550467	0.440524	-0.109942	0.519604	0.392109	-0.127495	0.828258	0.617099	-0.211159
PLD1					0.921103	0.749656	-0.171447	0.617976	0.458149	-0.159827	0.762382	0.60461	-0.157772	0.642605	0.477999	-0.164605	0.0671753	0.0660423	-0.00113301
PLEK2					0.898437	0.621877	-0.276559				0.463492	0.341869	-0.121623	0.373635	0.269966	-0.103668	0.0543826	0.0523703	-0.00201232
PLEKHA5		0.0350488	0.0368876	0.00183881	0.763914	0.649067	-0.114847	0.871331	0.682613	-0.188717	0.697157	0.539981	-0.157176	0.0474041	0.0451557	-0.0022484
PLEKHB1					0.825854	0.553544	-0.27231	0.617626	0.474039	-0.143587	0.676273	0.531856	-0.144417	0.424632	0.346533	-0.0780992	0.508631	0.40427	-0.104361
PLIN2								0.00802121	0.0120429	0.0040217	0.675357	0.543036	-0.132321	0.068821	0.0574492	-0.0113718
PLK3		0.00141136	0.00604683	0.00463547							0.579819	0.447419	-0.132399	0.0725504	0.0624776	-0.0100729	0.0329361	0.0296412	-0.00329494
PLLP					0.72272	0.524468	-0.198252				0.332535	0.282679	-0.0498557	0.0587531	0.0485706	-0.0101825	0.0243072	0.0223624	-0.00194483
PLOD2								0.0452047	0.0456336	0.000428874	0.676294	0.489481	-0.186813	0.111928	0.0885419	-0.0233865	0.049585	0.0557194	0.00613435
PLSCR4								0.0381813	0.0468784	0.00869703				0.879368	0.658218	-0.22115	0.0701738	0.0671981	-0.00297568
PLXDC2		0.207325	0.166987	-0.040338	0.566	0.4159	-0.1501				0.346528	0.25335	-0.0931782	0.0996882	0.0913635	-0.00832469	0.243395	0.218123	-0.0252717
PMAIP1								0.0641288	0.0610469	-0.00308196				0.252185	0.176326	-0.0758582	0.0471045	0.0486659	0.00156139
PMP22		0.807082	0.568308	-0.238774	0.896823	0.638593	-0.25823	0.0525181	0.0504659	-0.00205222	0.505654	0.36008	-0.145574	0.906932	0.721144	-0.185788	0.150419	0.117314	-0.0331052
PNLDC1	up				0.495264	0.401209	-0.0940552	0.948691	0.657024	-0.291667	0.599916	0.476341	-0.123574	0.94102	0.648279	-0.292741	0.920806	0.65721	-0.263596
PNRC1		0.0517269	0.056335	0.00460811				0.0383332	0.030755	-0.00757816	0.189343	0.143657	-0.0456859	0.0584738	0.0664866	0.00801282	0.0701542	0.0749422	0.00478803
POLB		0.0595537	0.0654808	0.00592707							0.518744	0.435979	-0.0827652	0.0407567	0.0314006	-0.0093561	0.0521656	0.0547761	0.00261049
POLE2											0.355703	0.280745	-0.0749587	0.821983	0.622462	-0.199521	0.141235	0.120402	-0.0208325
POLN					0.909691	0.7642	-0.145491				0.69517	0.552752	-0.142418
POLR2A	up				0.698182	0.552519	-0.145663				0.903568	0.678024	-0.225544	0.0542781	0.05703	0.0027519
POLR3F		0.0533378	0.0577695	0.00443161	0.890337	0.700683	-0.189654				0.484842	0.338653	-0.146189
PON3	up	0.0861368	0.0815857	-0.00455113							0.283163	0.239022	-0.0441408	0.216326	0.165128	-0.0511978	0.0722385	0.0551474	-0.0170912
POP1		0.074987	0.0759818	0.000994762	0.931894	0.659357	-0.272537	0.0974529	0.0735122	-0.0239407	0.905099	0.741277	-0.163822	0.0732638	0.0725323	-0.000731528	0.0140302	0.0158517	0.00182149
POSTN	up	0.873596	0.593893	-0.279702				0.368767	0.264321	-0.104446	0.200445	0.149419	-0.0510258	0.466278	0.300612	-0.165666	0.608931	0.522068	-0.0868624
POTEC								0.445154	0.368143	-0.0770107	0.448934	0.316248	-0.132687	0.50765	0.399359	-0.108291	0.730164	0.517423	-0.212741
PPA2		0.0874329	0.0858838	-0.00154911							0.328135	0.240215	-0.08792	0.482635	0.347287	-0.135348	0.1092	0.0873166	-0.0218831
PPARA	down				0.766397	0.546671	-0.219726	0.331958	0.251179	-0.0807787	0.907099	0.791331	-0.115767	0.212739	0.189262	-0.023477
PPM1K					0.933299	0.71557	-0.217728	0.173317	0.151154	-0.0221631				0.244871	0.199317	-0.0455539	0.017385	0.0230671	0.00568201
PPP1R15A								0.0399135	0.0433314	0.00341786	0.0594376	0.0482169	-0.0112207	0.838793	0.693431	-0.145362	0.0461225	0.047566	0.00144344
PPP1R1C	up	0.923364	0.644606	-0.278758							0.894374	0.657268	-0.237106	0.376851	0.264287	-0.112564	0.914931	0.72003	-0.1949
PPP1R3C	up	0.228537	0.172556	-0.0559807	0.910812	0.618048	-0.292764				0.561125	0.429537	-0.131588	0.675163	0.485163	-0.189999	0.414805	0.375136	-0.0396687
PRDM1	up				0.551301	0.379051	-0.17225	0.0741341	0.0762869	0.00215279	0.318115	0.257748	-0.0603664	0.114298	0.0836654	-0.0306321	0.0813051	0.0682364	-0.0130687
PRKAG1		0.0173177	0.0191276	0.00180992	0.90765	0.695581	-0.212069				0.485676	0.328069	-0.157607				0.206129	0.234259	0.0281304
PRKAR1B					0.820771	0.622032	-0.198739	0.562725	0.446192	-0.116533	0.803242	0.631531	-0.171711	0.782449	0.62322	-0.159229	0.762112	0.613772	-0.148339
PRKCA	down	0.0735362	0.0825161	0.00897995	0.896303	0.607741	-0.288562				0.814714	0.600066	-0.214648	0.494285	0.384117	-0.110167	0.0709235	0.0650961	-0.00582737
PRL		0.336505	0.231859	-0.104646	0.217798	0.165709	-0.0520897				0.54068	0.436627	-0.104053	0.68424	0.540165	-0.144075
PROCR					0.792502	0.62871	-0.163792	0.0952552	0.0887241	-0.00653105	0.922815	0.643762	-0.279053	0.866604	0.662179	-0.204425	0.106314	0.098588	-0.00772639
PROS1		0.0559838	0.058668	0.00268424	0.85862	0.696858	-0.161762				0.79911	0.635795	-0.163315	0.754608	0.537199	-0.217409	0.0971953	0.0890716	-0.0081237
PRR13								0.0555328	0.0565475	0.00101471	0.929208	0.70765	-0.221558	0.0479902	0.0521573	0.00416716	0.0709233	0.0652919	-0.00563139
PRR15		0.511218	0.420561	-0.0906578	0.843369	0.662753	-0.180615	0.71438	0.523263	-0.191117	0.707936	0.603125	-0.104811	0.766526	0.562479	-0.204047	0.897729	0.679315	-0.218415
PRR15L		0.565666	0.464368	-0.101298	0.922042	0.698252	-0.22379	0.235543	0.195943	-0.0396004	0.824727	0.595337	-0.229389	0.762168	0.559389	-0.202779	0.303516	0.24804	-0.0554764
PRR23A	up	0.74883	0.618235	-0.130595	0.898802	0.616103	-0.282699							0.828289	0.624485	-0.203804	0.924997	0.819198	-0.105798
PRR23C		0.745323	0.597715	-0.147608	0.226359	0.181145	-0.0452139							0.696072	0.524014	-0.172058	0.775477	0.608547	-0.16693
PRRG4					0.747202	0.567409	-0.179794	0.0853614	0.0671928	-0.0181686	0.906864	0.686558	-0.220306	0.0941783	0.0749578	-0.0192205	0.0815051	0.071418	-0.0100872
PRSS12		0.0945562	0.0831704	-0.0113858				0.0357622	0.0289855	-0.00677673	0.540768	0.405901	-0.134867	0.261726	0.184313	-0.077413	0.0207696	0.0215203	0.000750716
PRSS21											0.81835	0.634127	-0.184223	0.615429	0.529765	-0.0856644	0.448823	0.374819	-0.074004
PRTFDC1		0.0121137	0.0146076	0.00249395	0.306692	0.247842	-0.0588504				0.687675	0.509824	-0.177851	0.139321	0.125614	-0.0137068
PSAT1		0.0839575	0.0796833	-0.00427412							0.458452	0.324705	-0.133746	0.049548	0.0468225	-0.0027255
PSCA					0.484735	0.38294	-0.101795				0.536468	0.434468	-0.102	0.782519	0.609572	-0.172947	0.630157	0.500658	-0.1295
PSG9	up	0.37853	0.311359	-0.0671711							0.0384281	0.0467616	0.00833343	0.574993	0.471165	-0.103828
PSTPIP2	up	0.0148861	0.0125643	-0.00232181	0.741076	0.574214	-0.166863				0.595985	0.418008	-0.177977	0.449166	0.358927	-0.0902395	0.151668	0.120719	-0.0309494
PTCHD1		0.209773	0.185897	-0.0238754	0.172639	0.138629	-0.0340097				0.908537	0.688938	-0.219598	0.307892	0.286866	-0.021026	0.450108	0.378096	-0.0720124
PTGER4		0.283834	0.207193	-0.0766407	0.914568	0.62711	-0.287458	0.894715	0.533619	-0.361096	0.76979	0.562886	-0.206905	0.028283	0.0304109	0.0021279	0.0267922	0.0290941	0.00230193
PTGR1								0.126011	0.102886	-0.0231252	0.889273	0.624567	-0.264706	0.927731	0.692169	-0.235561	0.81768	0.577358	-0.240321
PTGS1	up							0.0642658	0.0444195	-0.0198463	0.239962	0.208432	-0.0315299	0.619469	0.472828	-0.146642	0.0875323	0.0829529	-0.00457941
PTGS2	up				0.224653	0.150339	-0.0743134	0.059868	0.0455649	-0.0143031	0.257765	0.209559	-0.0482067	0.12606	0.1042	-0.0218598	0.0920476	0.0863053	-0.0057423
PTH2R		0.738083	0.519064	-0.219019							0.556825	0.392963	-0.163862	0.799157	0.627434	-0.171723	0.932605	0.623132	-0.309473
PTPN22					0.739542	0.572444	-0.167098	0.0576646	0.0635111	0.00584649	0.658448	0.485974	-0.172474	0.80764	0.689875	-0.117765	0.0538532	0.0610238	0.00717064
PTPRF	down	0.03737	0.0356956	-0.00167438	0.907016	0.753593	-0.153422	0.492238	0.404819	-0.0874188	0.912698	0.707932	-0.204766	0.836968	0.596462	-0.240505	0.102014	0.0899257	-0.0120882
PTPRG	down	0.0941105	0.0947294	0.000618916	0.896837	0.623636	-0.273201				0.826631	0.62462	-0.202012	0.0494476	0.0507275	0.00127996	0.0549656	0.0469749	-0.00799074
PTPRH		0.243956	0.197292	-0.0466638	0.354188	0.291024	-0.0631633				0.535915	0.436333	-0.0995819	0.312026	0.251747	-0.0602788
PTRF		0.0835987	0.0870398	0.00344107	0.856865	0.639489	-0.217376				0.481859	0.350052	-0.131807	0.472009	0.355248	-0.116761	0.0352	0.0448351	0.00963512
PTX3								0.0517125	0.0717317	0.0200191
PVR		0.0671327	0.0650286	-0.00210414	0.923994	0.743734	-0.18026				0.715295	0.495096	-0.220199	0.644415	0.477557	-0.166858	0.125477	0.102967	-0.0225105
PVRL4					0.779292	0.510507	-0.268786	0.659591	0.498641	-0.16095	0.715529	0.558464	-0.157065	0.709195	0.533462	-0.175734	0.427701	0.369478	-0.0582227
PXK		0.0428167	0.0298422	-0.0129745	0.922209	0.600131	-0.322078				0.688934	0.517095	-0.17184	0.142086	0.115084	-0.0270024	0.0448043	0.0445262	-0.000278113
PYGL		0.040039	0.0440636	0.0040246							0.391902	0.316755	-0.0751463	0.0541438	0.0516747	-0.00246911	0.0166209	0.016053	-0.000567911
PYROXD1		0.237731	0.203731	-0.034							0.150185	0.108938	-0.0412468	0.312473	0.228523	-0.0839491	0.0411781	0.0309873	-0.0101908
R3HDM2	down	0.941735	0.706276	-0.235459	0.862274	0.831807	-0.0304672				0.826621	0.622521	-0.2041	0.825314	0.616708	-0.208606	0.903833	0.651788	-0.252044
RAB38		0.101924	0.100184	-0.00173969	0.530604	0.34762	-0.182984				0.406516	0.303466	-0.10305	0.142757	0.115659	-0.0270978	0.115511	0.0873632	-0.0281476
RAB39B		0.862553	0.640586	-0.221967	0.638023	0.358698	-0.279325	0.859126	0.619662	-0.239464	0.489153	0.410498	-0.0786553				0.944886	0.775702	-0.169184
RAB3B	up	0.898065	0.729964	-0.168101	0.702849	0.508806	-0.194043	0.593278	0.474665	-0.118613	0.609802	0.446032	-0.16377	0.686229	0.510007	-0.176223	0.709535	0.513119	-0.196416
RAB3D								0.0932308	0.0787958	-0.014435	0.985649	0.649981	-0.335668	0.288863	0.247893	-0.0409704	0.0938546	0.0918544	-0.00200015
RAB3GAP1					0.978116	0.728973	-0.249143				0.0492891	0.0555201	0.00623105	0.770316	0.543738	-0.226578	0.0908442	0.0837617	-0.00708252
RAB8B		0.0291574	0.0252518	-0.0039056	0.889454	0.666136	-0.223317				0.418843	0.296074	-0.122769	0.0598929	0.0510658	-0.0088271	0.0183691	0.0178973	-0.00047183
RAD54L		0.0250644	0.0243686	-0.000695845							0.768003	0.617757	-0.150246	0.127581	0.11418	-0.0134008	0.0674161	0.0643222	-0.00309391
RALGAPA2		0.124699	0.0981492	-0.0265495	0.926449	0.656825	-0.269624	0.0982142	0.0895071	-0.00870701	0.640122	0.445015	-0.195107	0.1473	0.116021	-0.031279	0.0167574	0.0144209	-0.00233651
RALGPS1					0.73336	0.583316	-0.150044	0.474719	0.384099	-0.0906204	0.749843	0.569916	-0.179927	0.206577	0.165654	-0.0409227	0.0831143	0.077319	-0.00579537
RALGPS2					0.931567	0.708153	-0.223414	0.318149	0.252153	-0.0659958	0.927056	0.689012	-0.238044	0.334241	0.25064	-0.083601	0.0192368	0.0137266	-0.00551027
RARRES1		0.0598317	0.0537469	-0.00608483				0.195616	0.161825	-0.0337903	0.451531	0.322414	-0.129117	0.684656	0.585539	-0.0991173
RASA1	down	0.0827334	0.0778415	-0.00489194	0.93149	0.622439	-0.309051				0.874818	0.668545	-0.206273	0.16637	0.156969	-0.00940117	0.0532544	0.0557704	0.00251598
RASGRF2	up	0.406148	0.376532	-0.0296162							0.602898	0.450996	-0.151902	0.9244	0.59343	-0.33097	0.734923	0.506105	-0.228818
RASGRP3	up	0.0634884	0.0639504	0.000462002	0.883406	0.681733	-0.201674	0.257848	0.202013	-0.0558355	0.402535	0.292789	-0.109746	0.511836	0.390067	-0.121769	0.524946	0.376359	-0.148588
RBL1					0.920375	0.657708	-0.262667	0.00830915	0.00388006	-0.00442909	0.493373	0.368483	-0.12489	0.620553	0.440979	-0.179574	0.0526262	0.0542808	0.00165462
RBM11		0.156313	0.142552	-0.0137612							0.20794	0.162703	-0.045237	0.761092	0.553607	-0.207485	0.0857584	0.0732392	-0.0125192
RBM43					0.608645	0.524591	-0.0840545				0.377056	0.298598	-0.0784576	0.286363	0.218751	-0.0676121	0.0515423	0.0491808	-0.00236151
RBM46	up	0.790719	0.627805	-0.162914				0.77249	0.567957	-0.204533	0.168396	0.151864	-0.0165319	0.503124	0.376969	-0.126155	0.788726	0.497838	-0.290888
RBMS3	down	0.0557456	0.0581714	0.00242575							0.82808	0.622206	-0.205874	0.0591438	0.0555097	-0.00363411	0.0648465	0.0581425	-0.00670402
RBP4					0.554972	0.40567	-0.149302	0.961635	0.627197	-0.334437	0.725768	0.558048	-0.16772	0.82723	0.61879	-0.20844	0.434295	0.400016	-0.0342789
RBP7		0.424454	0.378901	-0.0455524	0.738252	0.611049	-0.127203				0.833978	0.687037	-0.146941	0.289733	0.219212	-0.0705215	0.361998	0.306022	-0.0559761
RDH10	up	0.0380173	0.038846	0.000828715							0.655353	0.468849	-0.186504	0.0561931	0.0662251	0.010032
RELN	up	0.802206	0.554474	-0.247732	0.154816	0.111035	-0.0437804				0.639857	0.456244	-0.183613	0.61954	0.427937	-0.191604	0.941708	0.578019	-0.363689
RERG								0.512245	0.36602	-0.146225	0.373473	0.308388	-0.0650855	0.0724654	0.0615923	-0.0108731	0.0712965	0.0619034	-0.0093931
RFC3		0.118181	0.118624	0.000443533							0.558729	0.431759	-0.12697	0.548211	0.383194	-0.165017	0.0642276	0.0532584	-0.0109692
RFC5					0.920481	0.656549	-0.263932	0.034021	0.0323931	-0.00162792	0.899059	0.673139	-0.22592	0.253101	0.19388	-0.0592212	0.0464539	0.0448963	-0.00155764
RFPL4B		0.807446	0.594786	-0.21266	0.448592	0.368945	-0.0796461	0.733487	0.531951	-0.201536	0.668049	0.523076	-0.144973	0.706798	0.574007	-0.132791	0.678537	0.529067	-0.149469
RGS2	up	0.0625591	0.062764	0.000204975	0.852715	0.587247	-0.265468				0.0918146	0.0782402	-0.0135744	0.0602406	0.0520921	-0.00814849	0.00611565	0.0109271	0.00481149
RHBDD1					0.832407	0.605787	-0.22662	0.0378002	0.0373552	-0.000445002	0.797996	0.618452	-0.179544	0.0708329	0.0619752	-0.00885767	0.0642747	0.0675581	0.0032834
RHBDL2		0.103406	0.0821102	-0.0212955							0.663879	0.480342	-0.183537	0.868127	0.633181	-0.234946	0.136656	0.12404	-0.0126164
RHOBTB3		0.0217568	0.0193071	-0.00244974	0.925622	0.675182	-0.25044				0.533342	0.399963	-0.13338	0.041688	0.0333165	-0.00837149	0.0483462	0.0443568	-0.00398936
RHOD	up	0.196759	0.180681	-0.0160783	0.769864	0.562968	-0.206896				0.532514	0.395357	-0.137157	0.27135	0.230799	-0.0405506	0.254438	0.220616	-0.0338226
RHOF		0.0918725	0.0971068	0.00523433	0.895951	0.718963	-0.176988				0.157165	0.130433	-0.0267321	0.0601272	0.0614587	0.00133146	0.0506147	0.0516816	0.00106693
RHOXF2B											0.31947	0.25495	-0.0645209
RIN2		0.575183	0.453925	-0.121258	0.86903	0.610824	-0.258206				0.434927	0.337474	-0.0974537	0.705312	0.495868	-0.209444	0.373686	0.301137	-0.0725488
RLIM								0.0597086	0.0506579	-0.00905071				0.292383	0.220751	-0.0716314	0.0546448	0.055264	0.000619209
RLN3		0.918748	0.706224	-0.212524										0.807977	0.603636	-0.204341	0.696227	0.496226	-0.200001
RNF113B	up				0.87693	0.677123	-0.199807							0.793923	0.572634	-0.221289
RNF152		0.918182	0.658714	-0.259469	0.91858	0.811277	-0.107304	0.896957	0.633872	-0.263086	0.973098	0.735846	-0.237253	0.0693472	0.0690985	-0.000248667	0.911609	0.610775	-0.300835
RNF213					0.88737	0.585141	-0.302229	0.185357	0.163579	-0.0217786	0.897136	0.674241	-0.222895	0.0684794	0.0607341	-0.00774531
RNF41		0.00846391	0.00740571	-0.0010582	0.769952	0.600683	-0.169269	0.366625	0.260697	-0.105928	0.916678	0.689378	-0.2273	0.0599138	0.054129	-0.00578477	0.0384365	0.0393992	0.000962694
RNFT1		0.00693084	0.00754913	0.000618289							0.230951	0.204049	-0.0269017	0.0469413	0.045191	-0.00175024	0.0332376	0.0326117	-0.000625974
RNFT2		0.0445538	0.0371798	-0.00737397	0.7365	0.560524	-0.175976				0.633896	0.478588	-0.155308	0.0824768	0.0747807	-0.00769613
RNLS		0.0325508	0.0353695	0.00281872	0.908214	0.706705	-0.201509				0.575228	0.411748	-0.16348	0.266291	0.189519	-0.0767719	0.0724264	0.0651291	-0.00729734
ROPN1L	up	0.0398639	0.0394685	-0.000395308							0.691928	0.502251	-0.189677	0.0996158	0.0815511	-0.0180647	0.02874	0.026922	-0.00181805
ROS1		0.637991	0.475414	-0.162578	0.706122	0.545619	-0.160503	0.560032	0.419967	-0.140065	0.670254	0.57046	-0.0997941	0.656678	0.496417	-0.160261
RPA1					0.929717	0.640214	-0.289503				0.779518	0.580536	-0.198982	0.372187	0.266041	-0.106145
RPGR								0.30727	0.278619	-0.0286506	0.393336	0.306525	-0.0868114	0.208309	0.157839	-0.0504704	0.156178	0.124029	-0.0321492
RPL22L1		0.00188242	0.00285054	0.000968119							0.454456	0.320302	-0.134154	0.361972	0.253472	-0.1085	0.0554429	0.0576082	0.0021653
RPL39L					0.845044	0.68317	-0.161874	0.25771	0.193486	-0.0642233				0.0464731	0.0494425	0.00296935	0.048301	0.043262	-0.00503899
RPLP0P2											0.514411	0.387706	-0.126705	0.532885	0.429018	-0.103866
RPS7	up							0.0482687	0.0537838	0.00551507	0.497879	0.345905	-0.151974	0.584178	0.432513	-0.151666	0.0749574	0.0618056	-0.0131518
RPTOR	down	0.06659	0.0601991	-0.00639093	0.938794	0.700517	-0.238277				0.834814	0.612968	-0.221845	0.899583	0.703834	-0.19575	0.0375551	0.0362116	-0.0013435
RRAGA		0.17243	0.139386	-0.0330441										0.450293	0.356487	-0.0938066	0.0689757	0.0743896	0.00541389
RSAD2	up	0.064224	0.059384	-0.00483997	0.227696	0.167217	-0.0604791				0.0667338	0.0717754	0.00504154	0.100921	0.0636879	-0.0372334	0.0616654	0.0590402	-0.00262518
RSU1		0.405323	0.382431	-0.0228915	0.917793	0.641042	-0.276751	0.397117	0.310802	-0.0863154	0.809486	0.579273	-0.230213	0.11688	0.0946375	-0.022243	0.0544966	0.0517262	-0.00277043
RTKN2		0.0567516	0.0591765	0.00242494							0.580528	0.417596	-0.162932	0.0746461	0.0731904	-0.00145569	0.0235389	0.0271198	0.00358096
RTN1		0.0518289	0.0457717	-0.00605728	0.835746	0.605594	-0.230152				0.498083	0.377333	-0.12075	0.0982495	0.0786824	-0.0195671	0.105888	0.0904005	-0.0154879
RTP3	up										0.871355	0.616344	-0.255011	0.712478	0.545734	-0.166743
S100A3					0.685294	0.55282	-0.132473	0.119941	0.0869637	-0.0329771	0.867487	0.744493	-0.122994	0.87915	0.673177	-0.205973	0.0876868	0.0812381	-0.00644865
S100A7								0.057249	0.0587854	0.00153644	0.087017	0.0835777	-0.00343934
S100A8								0.0868735	0.0744546	-0.0124188	0.0769992	0.0801266	0.00312741	0.0446822	0.0428289	-0.00185332	0.253576	0.212329	-0.0412471
S100A9					0.150744	0.141708	-0.00903637	0.298151	0.240604	-0.0575465	0.538519	0.420249	-0.11827	0.30946	0.245221	-0.0642399	0.206136	0.166729	-0.0394068
SAA1	up	0.271579	0.223083	-0.0484959	0.830288	0.612629	-0.217659				0.83592	0.755807	-0.0801132	0.493273	0.373812	-0.119461	0.138481	0.115492	-0.0229887
SAA2	up				0.906636	0.697816	-0.208821				0.737828	0.618096	-0.119732	0.703967	0.549432	-0.154535	0.172387	0.130049	-0.0423386
SALL4		0.987393	0.787603	-0.199791	0.210141	0.147275	-0.0628667				0.340114	0.265689	-0.0744257	0.936145	0.731376	-0.204768	0.895289	0.651557	-0.243732
SAMD4A		0.0156529	0.0137483	-0.0019046	0.916375	0.654678	-0.261697	0.864223	0.625968	-0.238256	0.718521	0.529555	-0.188966	0.31442	0.237452	-0.0769686	0.0451189	0.0447895	-0.000329415
SAMHD1		0.0649089	0.0626131	-0.0022958	0.896996	0.698435	-0.198561				0.246807	0.179657	-0.0671497	0.0762737	0.0827773	0.0065036	0.0634364	0.0613898	-0.00204653
SAP25	up							0.891446	0.68827	-0.203176	0.733621	0.594468	-0.139153	0.892742	0.679014	-0.213728
SARS		0.0666034	0.05768	-0.00892333	0.876831	0.63114	-0.245691				0.41226	0.303605	-0.108655	0.658523	0.492825	-0.165698	0.0835703	0.084908	0.00133763
SBF2	down	0.0862526	0.0862614	8.82333e-06	0.904624	0.668878	-0.235747	0.038579	0.0431294	0.0045504	0.736177	0.555421	-0.180756	0.599802	0.458637	-0.141165	0.030234	0.0290483	-0.00118572
SBNO1		0.938644	0.732021	-0.206623	0.912071	0.653586	-0.258485				0.88766	0.655435	-0.232225	0.906566	0.702397	-0.204169
SCARNA9L											0.895486	0.648635	-0.24685	0.888799	0.597477	-0.291321	0.932959	0.68947	-0.243489
SCD	down	0.0746358	0.079405	0.00476926	0.890323	0.63709	-0.253233	0.257101	0.25775	0.000649165	0.51601	0.401688	-0.114322	0.111874	0.0934534	-0.0184205	0.0624944	0.0631684	0.000673976
SCD5		0.107684	0.111841	0.00415717	0.780211	0.524325	-0.255886	0.0358938	0.0356814	-0.000212381	0.68367	0.505968	-0.177702	0.455822	0.37494	-0.0808828	0.0281212	0.028967	0.000845781
SCEL					0.194851	0.121119	-0.0737318	0.802218	0.599761	-0.202457	0.101106	0.0790801	-0.0220256	0.593145	0.468996	-0.124149	0.260057	0.188423	-0.0716341
SCFD2	down	0.103278	0.086882	-0.0163965	0.84812	0.653878	-0.194242	0.0999909	0.0959545	-0.00403639	0.729249	0.543125	-0.186124	0.378036	0.272043	-0.105993	0.0607969	0.0622811	0.00148425
SCIN	up	0.151651	0.103778	-0.0478732				0.0461064	0.0414713	-0.00463505	0.472857	0.363995	-0.108862	0.277604	0.193665	-0.0839386	0.109545	0.0870065	-0.0225387
SCMH1								0.541467	0.4088	-0.132667	0.640248	0.485321	-0.154927	0.251125	0.180894	-0.0702311	0.0304692	0.0218883	-0.00858092
SCNN1A					0.902878	0.751577	-0.151301	0.446748	0.379446	-0.0673016	0.359446	0.295452	-0.0639941	0.351367	0.278827	-0.0725397	0.182931	0.149432	-0.0334992
SCPEP1					0.915602	0.775883	-0.13972				0.812571	0.56913	-0.243441	0.320767	0.233266	-0.0875008	0.0864882	0.0842104	-0.00227782
SDC2					0.643144	0.463804	-0.17934	0.104547	0.097659	-0.0068879	0.542117	0.40839	-0.133728	0.364446	0.252099	-0.112347	0.0872987	0.0807266	-0.00657218
SDCCAG8					0.908385	0.716506	-0.191879				0.8163	0.604693	-0.211607	0.0597609	0.0610526	0.00129167	0.0500231	0.050682	0.000658867
SDPR		0.0633469	0.0586318	-0.0047151	0.79032	0.583476	-0.206845	0.0698763	0.0652852	-0.00459108	0.91254	0.663277	-0.249264	0.425753	0.295191	-0.130562	0.0614551	0.0497321	-0.011723
SEC61A2								0.0151864	0.0166681	0.00148166	0.709412	0.529008	-0.180403	0.372921	0.270563	-0.102358	0.0631961	0.059226	-0.00397014
SELENBP1					0.365244	0.302397	-0.0628465	0.234551	0.202404	-0.0321473	0.41611	0.322958	-0.0931525	0.715659	0.566568	-0.149091	0.27973	0.227075	-0.0526545
SEMA3C					0.792078	0.626931	-0.165147	0.040005	0.0441469	0.00414183	0.797702	0.554226	-0.243476	0.0701195	0.0519015	-0.018218	0.0430081	0.0485401	0.00553199
SEMA3E	down	0.0740091	0.0669247	-0.00708441	0.355834	0.236708	-0.119126				0.55469	0.399815	-0.154875	0.648897	0.462638	-0.186259	0.322811	0.229777	-0.0930333
SEMA3F					0.66878	0.54727	-0.12151	0.516772	0.433248	-0.0835233	0.73036	0.560389	-0.169971	0.105961	0.0913752	-0.0145855	0.0196285	0.0235986	0.00397015
SEMA6D					0.0758385	0.0793626	0.00352418	0.580506	0.456017	-0.124489	0.496224	0.353496	-0.142728	0.20594	0.177001	-0.0289384
SEMA7A		0.0392001	0.0383359	-0.000864183	0.841088	0.617023	-0.224065				0.486313	0.377408	-0.108905	0.649138	0.503017	-0.146121	0.118666	0.111636	-0.00702984
SEPP1		0.262346	0.199575	-0.0627711										0.518485	0.38074	-0.137744
SERPINB2	up							0.707177	0.503602	-0.203575	0.688443	0.560669	-0.127773	0.67355	0.489449	-0.184101
SERPINB5	up	0.680361	0.520794	-0.159567	0.792048	0.578817	-0.213231	0.692739	0.489366	-0.203373	0.629455	0.476314	-0.153141	0.75425	0.58886	-0.16539	0.690471	0.51404	-0.176431
SERPINB8					0.874201	0.588021	-0.28618	0.0611568	0.0584364	-0.00272046	0.101436	0.0680584	-0.0333771	0.915327	0.559892	-0.355435	0.0813647	0.0599233	-0.0214413
SERPIND1	up	0.92877	0.669645	-0.259125				0.906894	0.650835	-0.256059				0.825022	0.632069	-0.192953	0.91457	0.633783	-0.280787
SERPINE1					0.518767	0.432197	-0.0865696	0.0703295	0.0714089	0.00107936	0.856197	0.614806	-0.241391	0.235432	0.18958	-0.0458521	0.0675449	0.0536803	-0.0138647
SERPINF1	up	0.34455	0.285444	-0.059106	0.92145	0.722114	-0.199336	0.673838	0.570557	-0.103281	0.80694	0.64546	-0.16148	0.753888	0.649511	-0.104377	0.662307	0.499673	-0.162635
SERPINI1	up							0.112438	0.0751321	-0.0373057	0.42622	0.354729	-0.0714908
SERTAD1	up				0.646224	0.486922	-0.159301	0.0766357	0.0763845	-0.000251234	0.846976	0.577878	-0.269098	0.0551093	0.0520099	-0.00309944	0.0484341	0.0524235	0.00398942
SERTAD4					0.901034	0.629303	-0.271731	0.477999	0.329154	-0.148845	0.318294	0.332993	0.0146989	0.204001	0.181861	-0.0221395
SESN2					0.878464	0.610718	-0.267746	0.0388519	0.0280525	-0.0107994	0.423889	0.32283	-0.101059	0.42436	0.308709	-0.115651	0.04917	0.0501189	0.000948937
SFMBT1		0.130762	0.113201	-0.0175613	0.852574	0.607143	-0.245431	0.848117	0.647424	-0.200692	0.3993	0.305823	-0.0934778	0.0790673	0.0723685	-0.00669887
SFN		0.0726427	0.0748589	0.00221625										0.210559	0.171417	-0.0391426	0.0508718	0.0486704	-0.00220142
SFTA1P	up										0.0477896	0.0485563	0.000766692	0.472345	0.311522	-0.160823
SFXN2					0.91724	0.721218	-0.196022	0.427857	0.321532	-0.106325	0.720587	0.612524	-0.108063				0.0494913	0.0515878	0.00209649
SGK1		0.572871	0.433963	-0.138908	0.88806	0.684414	-0.203646				0.528807	0.39167	-0.137137	0.333004	0.253092	-0.0799123	0.746234	0.504152	-0.242083
SGPL1					0.045278	0.0412297	-0.00404833	0.172013	0.155042	-0.0169709	0.678756	0.515083	-0.163673	0.416999	0.323182	-0.0938169	0.0767988	0.0648068	-0.011992
SH2D1B	up	0.421393	0.328104	-0.0932894	0.453759	0.371157	-0.0826018				0.329691	0.239673	-0.0900186	0.563265	0.41209	-0.151175
SH3KBP1		0.368913	0.343117	-0.0257964	0.873169	0.628846	-0.244323				0.453531	0.364614	-0.088917	0.465041	0.365282	-0.0997582
SH3PXD2B					0.685338	0.525638	-0.159699	0.0207804	0.0137051	-0.00707532	0.700106	0.55242	-0.147686	0.20457	0.147595	-0.0569752	0.116994	0.116765	-0.000229053
SH3RF2		0.0453778	0.0423062	-0.00307165	0.957243	0.663376	-0.293867	0.0865026	0.0806248	-0.00587789	0.65467	0.500643	-0.154027	0.174606	0.132557	-0.0420488	0.0654302	0.0503909	-0.0150393
SHANK2		0.854629	0.626858	-0.227771	0.693217	0.52103	-0.172187	0.720539	0.54799	-0.172549	0.742117	0.553575	-0.188542	0.80536	0.579769	-0.22559	0.862255	0.637905	-0.224351
SHCBP1		0.00674667	0.000592142	-0.00615453	0.947304	0.717324	-0.22998				0.323861	0.262114	-0.0617472	0.533063	0.373508	-0.159555	0.0168594	0.0165743	-0.000285087
SHISA2		0.862433	0.553301	-0.309132	0.94002	0.689026	-0.250994				0.343692	0.250871	-0.0928204	0.25273	0.203409	-0.0493207	0.360035	0.281206	-0.078829
SHMT2		0.801939	0.538719	-0.26322	0.917105	0.726757	-0.190349	0.0694187	0.0717196	0.00230086	0.311756	0.255325	-0.0564304	0.298592	0.210682	-0.0879103	0.0314518	0.0240849	-0.00736693
SIRT5		0.0662813	0.0707522	0.00447097	0.624117	0.442735	-0.181382	0.39486	0.329791	-0.0650688	0.859679	0.613815	-0.245864	0.0787108	0.0699179	-0.00879293	0.0103117	0.00889774	-0.00141396
SLBP					0.0592713	0.055247	-0.00402435	0.118843	0.103487	-0.0153563	0.363368	0.304721	-0.0586473	0.0750775	0.0645847	-0.0104927	0.0155623	0.011066	-0.00449627
SLC14A1	up				0.867966	0.687143	-0.180822	0.557162	0.42729	-0.129871	0.286159	0.236534	-0.0496254	0.364983	0.267471	-0.0975116	0.555577	0.375361	-0.180215
SLC16A1	up	0.645639	0.542399	-0.103241	0.879007	0.695578	-0.18343	0.817639	0.64876	-0.168878	0.500669	0.394209	-0.10646	0.647668	0.515525	-0.132144	0.741131	0.554627	-0.186504
SLC16A4	up				0.909075	0.702468	-0.206607	0.639149	0.483429	-0.15572	0.871715	0.611413	-0.260302	0.849987	0.548141	-0.301846	0.594701	0.425952	-0.168748
SLC16A9		0.271974	0.258162	-0.0138114	0.470885	0.332424	-0.138461	0.314672	0.260027	-0.0546452	0.260343	0.209543	-0.0508003	0.799916	0.668633	-0.131283	0.389665	0.334698	-0.0549664
SLC17A5		0.0653326	0.0647282	-0.000604447	0.705122	0.601183	-0.103938	0.0291767	0.0336486	0.0044719	0.0451917	0.0430231	-0.00216855	0.352139	0.265779	-0.0863601	0.0404854	0.0381235	-0.00236187
SLC1A5		0.0614901	0.0600465	-0.00144358							0.524493	0.395706	-0.128787	0.2595	0.220093	-0.0394077	0.0979109	0.101396	0.00348491
SLC1A6		0.689957	0.558257	-0.131701							0.144794	0.117118	-0.0276761	0.266346	0.216491	-0.0498551	0.323902	0.273394	-0.0505076
SLC20A1					0.825742	0.638388	-0.187355	0.0958898	0.0920617	-0.00382805	0.464851	0.354823	-0.110028	0.0674494	0.0680329	0.000583489	0.00887635	0.0110152	0.00213884
SLC22A15		0.0774561	0.0845851	0.00712896	0.747081	0.540814	-0.206267	0.0506478	0.0502272	-0.000420577	0.378553	0.261037	-0.117516	0.0507922	0.0478776	-0.00291459	0.0737254	0.0760008	0.00227539
SLC24A3		0.224602	0.17903	-0.0455728	0.825814	0.644205	-0.181608				0.331229	0.250752	-0.0804775	0.468749	0.37244	-0.0963092
SLC25A10		0.057429	0.0543066	-0.00312234	0.905525	0.686287	-0.219238				0.726455	0.56665	-0.159805	0.274151	0.215157	-0.0589947
SLC25A21					0.769949	0.588007	-0.181941	0.0557828	0.0480111	-0.00777166	0.436587	0.322301	-0.114286				0.120174	0.0971717	-0.0230025
SLC25A30		0.0155945	0.0192822	0.0036878	0.927255	0.667895	-0.25936	0.146777	0.121146	-0.0256313	0.784653	0.587585	-0.197068	0.416853	0.331004	-0.0858486	0.039192	0.0370934	-0.00209867
SLC28A1					0.60411	0.448005	-0.156105	0.528392	0.438117	-0.0902757	0.140731	0.108452	-0.0322787	0.763922	0.631796	-0.132126	0.656452	0.531865	-0.124587
SLC2A3		0.0711199	0.0692431	-0.00187681							0.068584	0.0768013	0.00821726	0.356971	0.254793	-0.102177	0.165857	0.176032	0.0101743
SLC35E3		0.00941883	0.010016	0.000597124	0.918159	0.684075	-0.234084				0.441781	0.315251	-0.12653	0.271267	0.206607	-0.0646598	0.0509158	0.0452666	-0.00564918
SLC37A1		0.91465	0.677398	-0.237251	0.768922	0.618511	-0.150411	0.44739	0.334671	-0.112718	0.583374	0.456634	-0.12674	0.61224	0.453635	-0.158605	0.644942	0.521207	-0.123736
SLC38A4		0.0406999	0.0329208	-0.00777907	0.500879	0.330908	-0.169971	0.172463	0.14645	-0.0260129	0.34572	0.263656	-0.0820635	0.41123	0.277252	-0.133978	0.0477504	0.0440172	-0.00373321
SLC38A5		0.689768	0.579956	-0.109813	0.445567	0.374167	-0.0713992	0.57876	0.464412	-0.114347	0.179857	0.134733	-0.0451238	0.706379	0.537442	-0.168938	0.697803	0.587358	-0.110446
SLC39A11		0.0973214	0.0864248	-0.0108966	0.956407	0.772239	-0.184169	0.0858097	0.0834753	-0.00233433	0.55303	0.436939	-0.116092	0.782722	0.589228	-0.193494	0.115078	0.101404	-0.0136742
SLC3A2											0.311893	0.246782	-0.0651114
SLC44A2					0.144937	0.0996669	-0.0452703	0.0341554	0.0195705	-0.0145848	0.573282	0.437698	-0.135584	0.412323	0.333278	-0.0790459	0.0935446	0.0870218	-0.00652283
SLC44A4					0.404447	0.333361	-0.0710859	0.50264	0.439971	-0.0626692	0.650062	0.506465	-0.143597	0.730503	0.6367	-0.0938033	0.591813	0.498028	-0.0937849
SLC46A3	up	0.0420199	0.0392433	-0.00277657	0.934675	0.704223	-0.230452				0.881497	0.524874	-0.356623	0.248495	0.173322	-0.0751734	0.049291	0.0459665	-0.0033245
SLC4A11		0.841619	0.667455	-0.174164	0.900035	0.655425	-0.24461				0.848737	0.648681	-0.200056	0.612306	0.488489	-0.123817	0.870331	0.629071	-0.24126
SLC5A1		0.667065	0.575455	-0.0916099	0.312516	0.243813	-0.0687036	0.25267	0.227492	-0.0251783	0.0763939	0.0626691	-0.0137248	0.195545	0.153901	-0.0416435	0.229923	0.202462	-0.0274617
SLC6A14					0.853963	0.687489	-0.166474	0.6243	0.498981	-0.125319	0.600572	0.457097	-0.143475	0.6796	0.491529	-0.188071	0.402424	0.300095	-0.102329
SLC6A15	up	0.90554	0.621868	-0.283672				0.578462	0.446133	-0.132329				0.89116	0.712077	-0.179083	0.926913	0.617277	-0.309636
SLC6A6					0.916263	0.661373	-0.25489	0.471185	0.362478	-0.108706	0.650872	0.472967	-0.177905	0.760627	0.540358	-0.220268	0.0972635	0.095347	-0.00191644
SLC6A9		0.0451723	0.0456462	0.000473945	0.849494	0.716798	-0.132696	0.442049	0.340064	-0.101985	0.861704	0.675276	-0.186428	0.632275	0.479089	-0.153186
SLC7A1					0.913821	0.599597	-0.314223	0.704993	0.504779	-0.200215	0.884005	0.630593	-0.253412	0.250748	0.173152	-0.0775966	0.0250678	0.0194187	-0.00564913
SLC7A11		0.0683767	0.0696097	0.00123299							0.817529	0.579234	-0.238295	0.396551	0.281216	-0.115335	0.0465903	0.0550419	0.00845158
SLC7A5		0.443651	0.425581	-0.0180697	0.923608	0.671622	-0.251986				0.764438	0.584039	-0.180399	0.36136	0.278735	-0.0826251	0.657705	0.552828	-0.104877
SLC7A8					0.193405	0.183463	-0.00994203	0.428043	0.354534	-0.0735087	0.448091	0.339804	-0.108286	0.519685	0.455212	-0.0644726	0.440184	0.3096	-0.130584
SLCO2A1		0.0156544	0.0166227	0.000968276							0.344386	0.270979	-0.073407	0.496644	0.424345	-0.0722993
SLCO4A1	down	0.964323	0.739977	-0.224346	0.780467	0.632404	-0.148063	0.769758	0.567185	-0.202573	0.75845	0.560208	-0.198242	0.850116	0.608534	-0.241582	0.845294	0.583942	-0.261352
SLCO4C1		0.164877	0.13951	-0.025367	0.219264	0.160957	-0.058307				0.0182538	0.0141707	-0.00408313	0.404919	0.328091	-0.0768276	0.156803	0.12315	-0.0336535
SLFN12		0.0817294	0.0789586	-0.00277078							0.916628	0.683878	-0.23275	0.0441241	0.0428997	-0.00122437	0.0757205	0.0750522	-0.000668358
SLFN13	up	0.197035	0.140386	-0.0566491	0.810611	0.590252	-0.220359	0.280276	0.212026	-0.0682503	0.799671	0.587104	-0.212567	0.885084	0.65549	-0.229594	0.441062	0.359448	-0.0816143
SLFN5		0.113575	0.135046	0.0214714	0.504541	0.349019	-0.155522	0.195252	0.137387	-0.0578653	0.809054	0.649149	-0.159905	0.464927	0.308491	-0.156436	0.0283735	0.030042	0.00166851
SLIT2								0.20111	0.14768	-0.0534298	0.447331	0.314669	-0.132662	0.0843171	0.0873256	0.00300846	0.0691085	0.0646539	-0.00445457
SLITRK5		0.140045	0.124425	-0.0156201	0.154034	0.107767	-0.0462673	0.636071	0.487337	-0.148734	0.626037	0.478358	-0.147678	0.0832368	0.0772594	-0.0059774	0.062092	0.0496926	-0.0123994
SLPI		0.191501	0.167165	-0.0243353							0.0708612	0.0578427	-0.0130185	0.0579651	0.0588127	0.000847534	0.0423725	0.0388109	-0.00356157
SMAD6					0.849642	0.643302	-0.20634	0.077912	0.0801921	0.00228011	0.659724	0.497597	-0.162127	0.442802	0.35159	-0.0912118	0.0720618	0.0707531	-0.00130868
SMARCA1		0.0664156	0.0697874	0.00337178							0.336564	0.242373	-0.0941913	0.193707	0.143537	-0.0501701	0.0867483	0.090731	0.00398269
SMEK3P											0.15734	0.129191	-0.0281489				0.1651	0.12563	-0.0394693
SNAI1	up	0.101455	0.0920354	-0.00942008	0.704668	0.541533	-0.163135	0.0397124	0.0291696	-0.0105428	0.691838	0.499201	-0.192637	0.42726	0.326853	-0.100406	0.0822263	0.0769996	-0.00522665
SNAPC1		0.0443493	0.0421624	-0.00218681	0.87832	0.66633	-0.21199				0.501	0.393256	-0.107744	0.0793303	0.0709477	-0.00838262	0.0493276	0.0513074	0.00197985
SNAR-D	up																0.698912	0.590214	-0.108699
SNAR-F											0.34478	0.289959	-0.0548215	0.761913	0.540183	-0.22173	0.619548	0.505251	-0.114297
SNAR-G1														0.66405	0.526891	-0.13716
SNAR-H																	0.492355	0.380303	-0.112052
SNHG8											0.077838	0.0722609	-0.00557707				0.0374273	0.0417725	0.0043452
SNORD114-1																	0.0496974	0.077562	0.0278646
SNORD114-13	down													0.0779212	0.0731103	-0.0048109
SNORD114-25											0.676761	0.548586	-0.128175	0.167278	0.139441	-0.0278372	0.0988632	0.0747628	-0.0241004
SNORD116-21																	0.151268	0.117667	-0.0336009
SNORD116-26																	0.0687076	0.055519	-0.0131886
SNORD18C														0.7865	0.587654	-0.198846
SNORD93														0.324654	0.233682	-0.0909724
SNRNP25					0.828218	0.638571	-0.189647	0.0221067	0.0167807	-0.005326	0.367294	0.271107	-0.0961871	0.0352266	0.0333979	-0.00182874	0.0332614	0.0341098	0.000848438
SNTB1	down	0.0436388	0.042482	-0.00115681				0.00747042	0.00982813	0.00235771	0.502678	0.386466	-0.116212	0.198665	0.155188	-0.0434774	0.036075	0.0372713	0.00119629
SNX10		0.0275422	0.0205934	-0.0069488				0.414283	0.30795	-0.106333	0.715102	0.503661	-0.211441	0.267875	0.205111	-0.0627641	0.0615951	0.0582632	-0.00333192
SORBS2		0.69322	0.501331	-0.191889	0.968895	0.772137	-0.196758	0.658858	0.487434	-0.171424	0.767423	0.591022	-0.176401	0.635955	0.465232	-0.170723	0.435167	0.317482	-0.117685
SORCS2	down	0.0136415	0.0171898	0.00354831	0.646835	0.588099	-0.0587361				0.634835	0.50297	-0.131865	0.529896	0.410607	-0.119288
SOST	up	0.871937	0.683137	-0.1888	0.735198	0.524954	-0.210245				0.939841	0.617992	-0.321848	0.710401	0.532423	-0.177978	0.75981	0.604524	-0.155286
SOSTDC1		0.709981	0.527962	-0.182019	0.834255	0.735789	-0.0984654				0.695624	0.516954	-0.17867	0.783173	0.664698	-0.118474	0.869886	0.716968	-0.152918
SOX15	up	0.912845	0.591402	-0.321443	0.304006	0.25026	-0.0537459				0.958905	0.710992	-0.247913	0.390434	0.321049	-0.0693851	0.0346433	0.0326842	-0.00195911
SOX30		0.809959	0.603256	-0.206702							0.733156	0.573766	-0.159391	0.452497	0.325597	-0.1269	0.924658	0.680907	-0.243751
SOX9					0.98221	0.726715	-0.255494	0.235576	0.196899	-0.0386764	0.782687	0.565028	-0.217659	0.344612	0.264261	-0.0803505	0.056501	0.054566	-0.00193501
SP140					0.870375	0.621383	-0.248992	0.8025	0.552862	-0.249638	0.667648	0.469393	-0.198255	0.0960082	0.0906294	-0.0053788	0.552709	0.402569	-0.15014
SPAG1								0.209482	0.150105	-0.0593767	0.216285	0.17073	-0.0455544	0.0702422	0.0665169	-0.00372528
SPARC	up	0.887229	0.659406	-0.227824	0.866551	0.711181	-0.15537	0.819891	0.619344	-0.200547	0.742624	0.547622	-0.195002	0.468958	0.350867	-0.118091	0.873473	0.634997	-0.238476
SPC24		0.0100047	0.00733075	-0.00267399	0.856172	0.711943	-0.144229	0.00569581	0.00863002	0.00293421	0.149972	0.130844	-0.0191277	0.299089	0.233971	-0.065118	0.0533919	0.0502647	-0.00312723
SPDEF		0.259705	0.227918	-0.0317872	0.756671	0.49541	-0.261261	0.620747	0.451855	-0.168891	0.772088	0.573219	-0.19887	0.678681	0.521282	-0.157399	0.318135	0.268327	-0.0498081
SPG7		0.0641984	0.0551348	-0.00906359	0.692666	0.573557	-0.119109				0.897789	0.674493	-0.223296	0.578549	0.434978	-0.143571	0.0141198	0.0128853	-0.00123455
SPINT2		0.0294605	0.0272971	-0.00216338	0.915036	0.732366	-0.182671	0.0148785	0.0130817	-0.00179682	0.132902	0.110977	-0.0219254	0.263753	0.194224	-0.0695293
SPNS2		0.0363912	0.0335606	-0.00283058	0.927958	0.616154	-0.311804				0.572423	0.440081	-0.132341	0.109846	0.0855555	-0.0242901	0.0246992	0.0257984	0.00109915
SPP1	up	0.864697	0.64599	-0.218708							0.879637	0.660929	-0.218708	0.471826	0.321628	-0.150198	0.628676	0.434824	-0.193851
SPRED1					0.899437	0.675278	-0.224159	0.0326678	0.0452183	0.0125505	0.766945	0.550658	-0.216287	0.0522278	0.0540974	0.00186961	0.0592911	0.0540393	-0.00525178
SPRY1		0.0679073	0.0632288	-0.00467855	0.928266	0.633668	-0.294598	0.112723	0.0884465	-0.0242767	0.882067	0.626721	-0.255346				0.059704	0.0643764	0.0046724
SPRY2		0.090008	0.095261	0.00525297	0.459128	0.300664	-0.158464	0.058859	0.061803	0.00294392	0.0868111	0.0679228	-0.0188883	0.0660195	0.0580276	-0.00799193	0.0552573	0.0537267	-0.00153058
SPRY4					0.907976	0.61626	-0.291716	0.129626	0.112046	-0.0175802	0.877445	0.63633	-0.241115	0.056575	0.0524498	-0.00412526	0.0692708	0.0688912	-0.000379622
SPTLC3					0.885712	0.655979	-0.229733	0.0589288	0.0563677	-0.00256112	0.923993	0.658489	-0.265504	0.786946	0.532051	-0.254895
SREBF1		0.00695905	0.00406105	-0.00289799	0.725527	0.553126	-0.172401				0.559783	0.413671	-0.146111	0.314806	0.244692	-0.0701138	0.029453	0.0343713	0.00491834
SRGAP1		0.0516067	0.0413883	-0.0102183	0.905655	0.701089	-0.204565				0.754968	0.563229	-0.191739	0.254207	0.195147	-0.0590594	0.0518116	0.0574375	0.00562593
SRGN		0.148067	0.130969	-0.0170974							0.904238	0.701363	-0.202875	0.612439	0.472984	-0.139455	0.132775	0.119237	-0.0135372
SRPX2		0.0368682	0.0440564	0.00718826							0.972057	0.737871	-0.234186	0.4982	0.408239	-0.0899613	0.0620199	0.0583899	-0.00363006
SSBP2											0.487373	0.375337	-0.112036	0.538564	0.391516	-0.147048	0.0844364	0.0888513	0.00441497
SSH1		0.966941	0.736773	-0.230168	0.941518	0.731048	-0.21047	0.0112884	0.0155702	0.00428181	0.727623	0.521959	-0.205664	0.0907895	0.0765646	-0.014225	0.871808	0.56612	-0.305688
SSH3					0.790311	0.59018	-0.200132	0.0168379	0.0141514	-0.00268652	0.363393	0.305781	-0.0576116	0.272028	0.223814	-0.0482141	0.0803621	0.0727878	-0.00757429
SSX1	up				0.236931	0.190545	-0.0463856	0.423694	0.344753	-0.0789419				0.763594	0.614455	-0.149139
SSX4B	up																0.418919	0.317974	-0.100945
SSX9								0.612331	0.462423	-0.149907	0.434701	0.361094	-0.073607	0.344644	0.268867	-0.0757775	0.581022	0.438972	-0.142051
ST6GALNAC3		0.259673	0.208319	-0.0513531	0.0942472	0.0805656	-0.0136815				0.330359	0.249139	-0.0812203	0.270869	0.20572	-0.0651489	0.509233	0.449068	-0.0601652
ST6GALNAC5		0.951222	0.649996	-0.301227	0.384535	0.292257	-0.0922783				0.634375	0.480777	-0.153597	0.217051	0.140928	-0.0761235	0.938221	0.719077	-0.219145
ST8SIA1					0.288883	0.238362	-0.0505213	0.795918	0.557372	-0.238546	0.656587	0.493886	-0.1627	0.0850901	0.0758735	-0.00921658	0.294695	0.226748	-0.0679476
STAC2		0.685733	0.577568	-0.108165	0.84214	0.67136	-0.17078				0.642986	0.498786	-0.1442	0.657281	0.505309	-0.151973	0.928728	0.736533	-0.192195
STAG3		0.981262	0.634144	-0.347119				0.811517	0.591995	-0.219522	0.477832	0.4463	-0.0315321	0.0699578	0.0632644	-0.00669339	0.959683	0.712466	-0.247217
STARD5		0.0371809	0.0421366	0.00495571	0.293073	0.221435	-0.0716381	0.0142734	0.0135114	-0.000761926	0.453927	0.351916	-0.102011	0.326316	0.245559	-0.0807574	0.0445157	0.0417727	-0.00274308
STC2	up	0.649394	0.452342	-0.197052	0.697686	0.540602	-0.157084	0.798947	0.547007	-0.25194	0.774827	0.565691	-0.209135	0.801571	0.607446	-0.194125	0.961757	0.686922	-0.274835
STEAP1		0.212676	0.207409	-0.00526756				0.742468	0.555223	-0.187244				0.414842	0.326622	-0.08822	0.293135	0.246258	-0.0468775
STEAP2		0.00917573	0.00955038	0.000374646	0.914891	0.731101	-0.18379	0.622967	0.43458	-0.188387	0.866073	0.693756	-0.172317	0.187911	0.135589	-0.0523216	0.0509982	0.0485638	-0.0024344
STEAP4					0.815363	0.584581	-0.230783	0.154009	0.121779	-0.0322301	0.781352	0.614055	-0.167297	0.889025	0.698432	-0.190594	0.150678	0.131592	-0.0190859
STK17A		0.086521	0.0878858	0.00136485	0.922634	0.735645	-0.186989				0.516408	0.395655	-0.120754	0.090781	0.0815615	-0.00921951	0.0739898	0.08141	0.00742021
STK31	up	0.901047	0.658814	-0.242233				0.929391	0.654484	-0.274907	0.817783	0.604959	-0.212824	0.912781	0.667352	-0.245428	0.926725	0.65436	-0.272365
STK38		0.0252928	0.0219153	-0.0033775	0.856194	0.523545	-0.33265	0.0588533	0.0601735	0.00132022	0.847427	0.561851	-0.285576	0.666802	0.461942	-0.20486	0.0752748	0.0678167	-0.0074581
STOM	up							0.141731	0.139154	-0.00257723	0.482454	0.385166	-0.0972873	0.788441	0.495143	-0.293297
STX8	down				0.627612	0.460449	-0.167163	0.0317908	0.0366727	0.00488185	0.602813	0.442492	-0.160321
STXBP1		0.0709583	0.076282	0.00532368	0.815843	0.618266	-0.197577				0.491473	0.371161	-0.120311	0.164345	0.138481	-0.0258641
STYK1					0.914776	0.713034	-0.201742	0.188903	0.154663	-0.0342399	0.913731	0.693348	-0.220384	0.419113	0.264809	-0.154304	0.0743241	0.0727435	-0.0015806
SUCLG2		0.0191372	0.0129414	-0.00619582	0.780521	0.507639	-0.272882				0.577271	0.446743	-0.130528	0.671422	0.534383	-0.137038	0.0471623	0.0470605	-0.000101745
SULT2B1		0.821389	0.580032	-0.241357							0.22832	0.188323	-0.0399975	0.708923	0.563863	-0.14506	0.813414	0.598397	-0.215017
SUMF1	down	0.0293569	0.0301328	0.000775988	0.903918	0.731586	-0.172332				0.67551	0.489081	-0.186429	0.50793	0.388646	-0.119283	0.0766639	0.0826156	0.00595174
SUMF2		0.0171712	0.000450292	-0.0167209							0.5889	0.414227	-0.174673	0.201384	0.152408	-0.0489766	0.0485629	0.050071	0.00150819
SUOX					0.904416	0.722511	-0.181905	0.06044	0.0554998	-0.00494024	0.945683	0.770622	-0.17506	0.0550055	0.0559401	0.000934561	0.0667087	0.0639291	-0.00277956
SUPT3H	down				0.822678	0.545599	-0.277079	0.483861	0.387153	-0.096708	0.834609	0.643275	-0.191334	0.0803984	0.0760554	-0.00434301
SUSD1											0.548703	0.424235	-0.124468	0.69605	0.550995	-0.145055	0.46907	0.412106	-0.0569633
SUSD2	up				0.163391	0.100777	-0.0626138	0.555714	0.462879	-0.0928344	0.740744	0.59105	-0.149695	0.940922	0.705592	-0.23533	0.508671	0.461104	-0.0475663
SUV39H2		0.0142716	0.0153793	0.00110769	0.906147	0.617508	-0.288639	0.327248	0.270416	-0.0568324	0.9181	0.695924	-0.222176	0.0435307	0.046578	0.00304729	0.0602369	0.0618714	0.00163452
SVEP1		0.932578	0.639214	-0.293364							0.61168	0.474459	-0.137221	0.685929	0.569842	-0.116087	0.911793	0.748678	-0.163115
SYCP2	up	0.797324	0.53216	-0.265165				0.548025	0.393182	-0.154843	0.521058	0.382663	-0.138394	0.919375	0.667513	-0.251861	0.844067	0.620694	-0.223373
SYCP3	up							0.878512	0.645544	-0.232968	0.865445	0.802623	-0.0628224	0.868892	0.64292	-0.225972	0.956592	0.73506	-0.221531
SYNM		0.395949	0.263593	-0.132357	0.940915	0.66928	-0.271635				0.869355	0.66602	-0.203335	0.0815766	0.0784524	-0.00312418	0.0187931	0.0173082	-0.00148493
SYT11	up	0.0814152	0.0737369	-0.00767826	0.496197	0.431209	-0.064988				0.525375	0.432452	-0.0929231	0.628602	0.478554	-0.150047	0.0620057	0.0532234	-0.00878223
SYT12					0.817056	0.603013	-0.214043	0.204179	0.171462	-0.0327172	0.633291	0.512387	-0.120904	0.0796029	0.07509	-0.004513
SYT16		0.300264	0.249342	-0.0509221	0.620579	0.449762	-0.170817				0.525863	0.428768	-0.0970947	0.609162	0.462968	-0.146194
SYT7		0.115448	0.107301	-0.00814741	0.450671	0.367536	-0.0831345				0.511606	0.398459	-0.113147	0.272835	0.222664	-0.050171
SYTL2		0.640907	0.472571	-0.168337	0.910799	0.660618	-0.250182	0.4378	0.301526	-0.136273	0.827749	0.596789	-0.23096	0.326531	0.256407	-0.070124	0.453522	0.360298	-0.0932236
TACSTD2		0.0509794	0.0498053	-0.00117407	0.0706766	0.0669836	-0.00369306	0.0593173	0.0550146	-0.00430268				0.157904	0.130749	-0.027155	0.0907324	0.0731465	-0.017586
TAF11		0.114787	0.105911	-0.00887579	0.832187	0.578922	-0.253265				0.52466	0.39411	-0.13055	0.0695382	0.0736357	0.00409751	0.0503259	0.0515167	0.00119084
TAF1A		0.0507785	0.0583246	0.00754613				0.476456	0.29703	-0.179426				0.271554	0.221862	-0.0496925	0.0558645	0.057259	0.00139447
TAF1D											0.215373	0.137849	-0.0775238	0.453444	0.314344	-0.1391
TAF5		0.0621248	0.0580624	-0.0040624							0.317562	0.236843	-0.0807193	0.899613	0.710165	-0.189448	0.0637524	0.0655927	0.0018403
TAF7		0.46715	0.312445	-0.154705	0.916911	0.636591	-0.280319	0.04749	0.0510611	0.00357115				0.103996	0.0814056	-0.0225899	0.0525526	0.0526726	0.000119976
TAP1	up							0.0999876	0.0967572	-0.00323034	0.719979	0.500291	-0.219689				0.16156	0.16088	-0.000680367
TAS2R10	down																0.875217	0.730465	-0.144752
TATDN1								0.0717324	0.0743354	0.00260298	0.30067	0.228183	-0.0724865	0.0833772	0.0702718	-0.0131054	0.0412046	0.0358891	-0.00531545
TBC1D16					0.859787	0.61788	-0.241908	0.885667	0.672591	-0.213076	0.798448	0.592421	-0.206027
TBC1D19		0.0551969	0.0595662	0.00436932	0.894332	0.70257	-0.191762	0.074971	0.0680332	-0.00693778	0.86794	0.685616	-0.182323	0.0746358	0.0701088	-0.00452703	0.0582394	0.0511547	-0.00708479
TBC1D22A	down	0.0198986	0.0238608	0.00396217	0.865697	0.661625	-0.204072				0.856579	0.632554	-0.224025	0.0537956	0.0541528	0.000357181	0.0570079	0.0622296	0.00522177
TBC1D5		0.286846	0.208665	-0.0781807	0.682857	0.45774	-0.225116	0.5553	0.419593	-0.135707	0.774209	0.561164	-0.213045	0.153999	0.113807	-0.040192	0.0351807	0.0389257	0.00374502
TBCD	down				0.897148	0.697077	-0.200071	0.01463	0.0148909	0.000260915	0.865369	0.642063	-0.223306	0.554137	0.40175	-0.152387	0.0194899	0.0173285	-0.00216142
TC2N		0.358099	0.293135	-0.0649643	0.534547	0.394104	-0.140443	0.29347	0.231332	-0.0621377	0.715723	0.534564	-0.181159	0.609852	0.469359	-0.140493	0.280229	0.219008	-0.061221
TDRD1	up	0.970724	0.703335	-0.267388	0.692802	0.502672	-0.19013	0.799482	0.621569	-0.177913	0.932906	0.76822	-0.164686	0.733361	0.539244	-0.194118	0.897865	0.700599	-0.197266
TDRD12	up							0.931111	0.692272	-0.238838	0.755036	0.577881	-0.177155	0.649144	0.518107	-0.131037	0.94208	0.672439	-0.269641
TDRD6	up	0.774594	0.541399	-0.233195										0.894705	0.617304	-0.277401	0.632317	0.460982	-0.171335
TDRD9	up							0.628925	0.396557	-0.232368	0.386101	0.306316	-0.0797854	0.564698	0.447604	-0.117094	0.724074	0.563657	-0.160417
TEAD1		0.0638885	0.0490414	-0.0148471	0.910976	0.629594	-0.281382	0.63551	0.474451	-0.161059	0.76809	0.564659	-0.20343	0.0498703	0.0541025	0.00423221	0.0278515	0.0293835	0.00153197
TEAD2					0.544246	0.420155	-0.124091	0.0524888	0.0555014	0.00301258	0.975262	0.805336	-0.169926
TEC					0.940553	0.740762	-0.199791	0.290281	0.222927	-0.0673549	0.73819	0.583968	-0.154222	0.163905	0.12223	-0.0416742	0.0169325	0.0147092	-0.00222325
TES					0.933835	0.719475	-0.21436	0.0636222	0.0861679	0.0225457	0.523435	0.394787	-0.128647	0.769221	0.586105	-0.183116	0.0448634	0.0467558	0.00189243
TET1	down	0.632689	0.570042	-0.0626469	0.834904	0.588023	-0.246882	0.675573	0.535079	-0.140495	0.519027	0.416057	-0.10297	0.708045	0.535045	-0.173	0.54049	0.455378	-0.0851122
TEX11	up							0.336939	0.275103	-0.0618363	0.468481	0.397527	-0.0709543	0.46957	0.390952	-0.0786177	0.766309	0.625451	-0.140859
TEX14	up	0.983357	0.746119	-0.237238	0.530736	0.394288	-0.136447	0.576283	0.442402	-0.133881	0.200196	0.155438	-0.0447583	0.576651	0.423907	-0.152743	0.918075	0.584907	-0.333168
TEX15	up	0.356565	0.213412	-0.143153										0.423454	0.329317	-0.0941377
TEX9		0.0537854	0.0579674	0.00418204							0.0515842	0.0481015	-0.00348271	0.0742491	0.0704565	-0.00379259	0.0127953	0.0137788	0.000983526
TFAP4		0.0503512	0.0482172	-0.00213404	0.864813	0.721585	-0.143228				0.688426	0.520206	-0.16822	0.0922473	0.0892329	-0.00301444	0.0651437	0.0818592	0.0167155
TFB1M					0.934802	0.731593	-0.203209	0.110698	0.090738	-0.0199602	0.63679	0.474919	-0.161871	0.0619056	0.0596474	-0.00225823	0.0256672	0.0313704	0.00570315
TFCP2L1					0.454101	0.362686	-0.0914146	0.085668	0.0881044	0.00243639	0.47075	0.370577	-0.100173	0.33489	0.284712	-0.0501779	0.180386	0.137271	-0.0431155
TFE3		0.221324	0.185736	-0.0355875	0.739952	0.550033	-0.189919				0.19367	0.154959	-0.0387107	0.418414	0.346736	-0.0716782	0.112965	0.0997507	-0.0132148
TFPI		0.0393484	0.0425165	0.00316802				0.59186	0.424234	-0.167626				0.893197	0.635791	-0.257406
TFPI2	up	0.0388678	0.0365767	-0.00229112							0.14577	0.105801	-0.0399689	0.406246	0.251608	-0.154638	0.0272372	0.0229077	-0.00432953
TGFB1I1					0.818709	0.528054	-0.290655				0.606979	0.459703	-0.147276	0.373282	0.275877	-0.0974044
TGFB2		0.063539	0.0626431	-0.000895875	0.907997	0.61738	-0.290617				0.426195	0.326164	-0.100031	0.0505082	0.0471563	-0.00335192	0.0137121	0.00718994	-0.00652211
TGFBR3		0.0687713	0.0671845	-0.00158677	0.851323	0.664949	-0.186374	0.384027	0.289413	-0.0946138	0.659807	0.47174	-0.188067	0.1803	0.139034	-0.0412664	0.0622057	0.0719367	0.00973101
TGM2					0.893429	0.63897	-0.254458				0.842244	0.632508	-0.209736	0.0615248	0.0581612	-0.00336355	0.0911978	0.0740781	-0.0171197
THBS1		0.0341252	0.0321021	-0.00202306	0.860202	0.635763	-0.224438	0.0612391	0.0596617	-0.00157748	0.694481	0.503683	-0.190798	0.0580325	0.0561792	-0.00185331	0.0409409	0.0383954	-0.00254557
THOC6														0.136901	0.134194	-0.00270687
THY1		0.415296	0.379239	-0.0360563	0.439347	0.354282	-0.0850649	0.575692	0.468115	-0.107577	0.442069	0.366145	-0.0759234	0.328646	0.285676	-0.0429699	0.413099	0.338969	-0.0741305
TIAM2		0.918672	0.614945	-0.303727				0.745589	0.577796	-0.167793	0.684044	0.490396	-0.193648	0.921418	0.718996	-0.202422
TIPARP		0.0431576	0.0493776	0.00621997	0.84282	0.644444	-0.198377	0.0718398	0.0661927	-0.00564708	0.659524	0.454482	-0.205042	0.124446	0.109596	-0.0148506
TJP3		0.857976	0.601282	-0.256694							0.89082	0.700192	-0.190629	0.670718	0.50955	-0.161168
TK1		0.0817432	0.0810978	-0.000645402	0.727826	0.605548	-0.122278				0.814152	0.645263	-0.168889
TK2		0.0449799	0.0493057	0.00432579	0.122084	0.10592	-0.0161642	0.078187	0.0775993	-0.000587682	0.759882	0.571858	-0.188024				0.286749	0.190437	-0.0963119
TKTL1	up				0.185219	0.150675	-0.0345437				0.388765	0.334187	-0.0545781	0.6039	0.469445	-0.134455	0.346223	0.282959	-0.0632631
TLR3	down	0.0531021	0.0532514	0.000149355				0.057271	0.0459345	-0.0113365	0.709962	0.534514	-0.175448	0.092594	0.0926933	9.924e-05	0.0629403	0.0579346	-0.00500573
TLR4	up										0.15793	0.117937	-0.039993
TLR5					0.255282	0.195017	-0.0602644	0.455446	0.355442	-0.100004	0.33671	0.253935	-0.0827745	0.426579	0.344098	-0.0824806	0.0360995	0.0325752	-0.00352434
TLR6					0.782719	0.614754	-0.167965	0.637182	0.492005	-0.145177	0.770565	0.63515	-0.135416	0.080347	0.0697615	-0.0105856	0.0778805	0.0667782	-0.0111023
TMC5	up				0.913751	0.720053	-0.193698	0.485162	0.356637	-0.128525	0.783073	0.595191	-0.187882	0.598791	0.493392	-0.105399	0.11937	0.0969553	-0.0224151
TMEM128					0.832848	0.636326	-0.196522	0.0824154	0.0887737	0.00635824	0.662658	0.237788	-0.42487	0.159825	0.128437	-0.031388	0.0755792	0.0751878	-0.000391359
TMEM135	down	0.0254923	0.0256913	0.000199	0.931103	0.73013	-0.200973				0.563759	0.439365	-0.124393	0.28944	0.212915	-0.0765257	0.112926	0.111986	-0.000939567
TMEM154		0.0954439	0.0943374	-0.00110653	0.564879	0.425996	-0.138883				0.562075	0.43882	-0.123255	0.536882	0.383726	-0.153156	0.379397	0.298617	-0.0807801
TMEM156					0.892397	0.715803	-0.176595				0.784819	0.625628	-0.15919	0.134239	0.10058	-0.0336593
TMEM158		0.0894319	0.0885443	-0.00088755	0.145265	0.113053	-0.0322121							0.489382	0.368802	-0.12058	0.131446	0.142543	0.0110968
TMEM159								0.241909	0.175178	-0.0667314	0.889379	0.661679	-0.2277				0.0489558	0.0491334	0.000177573
TMEM171	up							0.0977775	0.0802689	-0.0175086	0.828473	0.666529	-0.161944	0.529086	0.457991	-0.0710951	0.389409	0.348975	-0.0404341
TMEM19					0.827785	0.649352	-0.178433	0.0402484	0.0431537	0.00290523	0.880011	0.652722	-0.227289	0.295037	0.220531	-0.0745051	0.0413845	0.0426731	0.0012886
TMEM194A		0.0405666	0.0371185	-0.00344801	0.929015	0.723078	-0.205937				0.277902	0.226643	-0.0512589	0.0599827	0.0658852	0.00590243	0.04256	0.0455081	0.00294806
TMEM2					0.588175	0.431282	-0.156893	0.0659186	0.0742782	0.00835962				0.086419	0.0788052	-0.00761377	0.100775	0.0924616	-0.00831323
TMEM43		0.0628967	0.0674921	0.00459536	0.964827	0.607807	-0.35702				0.939721	0.688887	-0.250834	0.584223	0.409165	-0.175058
TMEM45A	up							0.452027	0.352534	-0.0994936	0.466943	0.338692	-0.128251	0.275548	0.197914	-0.0776334	0.0561436	0.0584848	0.00234128
TMEM50B					0.908465	0.669725	-0.23874	0.231904	0.210346	-0.021558	0.898627	0.770111	-0.128515	0.0894388	0.0886034	-0.00083545	0.0649906	0.0705041	0.00551351
TMEM88	up	0.919521	0.648794	-0.270727	0.858301	0.600159	-0.258142				0.908531	0.66919	-0.239341	0.932398	0.762366	-0.170032	0.906254	0.671986	-0.234268
TMEM97		0.0372522	0.0323083	-0.0049439							0.397462	0.283465	-0.113997	0.306412	0.235683	-0.0707282	0.00750354	0.00687022	-0.000633314
TMLHE								0.34555	0.275584	-0.0699656	0.0932126	0.0842116	-0.009001	0.176239	0.139845	-0.0363938	0.438291	0.348841	-0.0894502
TMOD1								0.196597	0.175101	-0.0214965	0.584048	0.44543	-0.138617	0.444084	0.308086	-0.135998
TMPRSS11F	up				0.164845	0.124971	-0.039874				0.64054	0.514678	-0.125862	0.74719	0.54543	-0.20176	0.300769	0.22724	-0.0735295
TMTC4	down							0.30167	0.248282	-0.0533882	0.901099	0.668672	-0.232427	0.259763	0.16194	-0.0978225	0.0368199	0.0316838	-0.00513612
TNC	down	0.0742752	0.0808135	0.00653835				0.817246	0.691434	-0.125812	0.647521	0.457825	-0.189696				0.0693835	0.0783002	0.00891671
TNFAIP3	up				0.855231	0.625012	-0.230219	0.0731554	0.0693459	-0.00380953	0.922271	0.67456	-0.247711	0.0719755	0.074227	0.00225156	0.0479861	0.0486023	0.000616128
TNFAIP6								0.66011	0.455105	-0.205004	0.91229	0.779014	-0.133276	0.548071	0.411847	-0.136224	0.902041	0.717283	-0.184758
TNFAIP8L3		0.566634	0.449583	-0.117051	0.390827	0.296195	-0.0946314				0.648707	0.495973	-0.152734	0.363833	0.272252	-0.091581
TNFRSF10B					0.0832921	0.0714493	-0.0118429	0.0650784	0.0585821	-0.00649624	0.347364	0.295504	-0.0518594	0.067267	0.0591167	-0.00815027	0.0128915	0.017435	0.00454358
TNFRSF10D		0.0636385	0.0616867	-0.0019518	0.858338	0.641338	-0.217				0.200115	0.183705	-0.0164106	0.873925	0.696368	-0.177557	0.0645636	0.0645344	-2.91167e-05
TNFRSF12A		0.0045501	0.0104534	0.0059033							0.0618775	0.0634476	0.00157006	0.469598	0.438046	-0.0315516	0.0848049	0.082312	-0.00249285
TNFRSF21					0.867942	0.599161	-0.26878	0.0493905	0.0495074	0.000116911	0.778019	0.551291	-0.226728	0.106834	0.0987836	-0.00804992	0.0435281	0.0396432	-0.00388485
TNFRSF9	up							0.915826	0.669915	-0.245911	0.864503	0.67916	-0.185343	0.54029	0.39033	-0.14996	0.090584	0.084842	-0.00574199
TNFSF18	up										0.765927	0.541413	-0.224514	0.881744	0.709006	-0.172738
TNIP1					0.915695	0.696139	-0.219557	0.233905	0.164154	-0.0697511	0.771547	0.550026	-0.221521	0.623482	0.467781	-0.155701	0.142022	0.111637	-0.0303854
TNIP3		0.634338	0.534664	-0.0996742	0.664814	0.513405	-0.151409	0.612006	0.478302	-0.133703	0.37053	0.265792	-0.104738	0.791714	0.594973	-0.196741	0.54022	0.390489	-0.149731
TNKS		0.0525187	0.0518527	-0.000665945	0.92279	0.716523	-0.206267	0.0108117	0.0156215	0.00480985	0.817857	0.58622	-0.231636	0.355266	0.251455	-0.103811	0.0262548	0.0266328	0.000378043
TNS4	up				0.866451	0.630075	-0.236376	0.802789	0.620831	-0.181958	0.604683	0.47379	-0.130893	0.845325	0.634705	-0.21062	0.672992	0.551436	-0.121556
TPCN1		0.10345	0.0995048	-0.0039454	0.908362	0.633427	-0.274935	0.240215	0.210663	-0.0295521	0.851403	0.657255	-0.194148				0.0527177	0.054618	0.00190027
TPD52L1	up				0.871616	0.710145	-0.161472	0.479376	0.370329	-0.109047	0.363809	0.290442	-0.0733679	0.262445	0.207911	-0.0545341	0.0545201	0.0462335	-0.00828665
TRAF1	up				0.716348	0.553902	-0.162446	0.228846	0.180096	-0.0487506	0.288961	0.252776	-0.0361848	0.855354	0.628074	-0.22728	0.957448	0.71142	-0.246028
TRAM2					0.801922	0.6053	-0.196623	0.0383704	0.0387515	0.000381194	0.486426	0.340965	-0.145461	0.068226	0.0681883	-3.77583e-05	0.0473797	0.0475713	0.000191622
TRAPPC9	down	0.155414	0.129787	-0.0256263	0.722865	0.564956	-0.157909	0.402519	0.304521	-0.0979986	0.775689	0.588544	-0.187144	0.806958	0.602938	-0.20402
TRHDE					0.0929599	0.0693228	-0.0236371				0.470958	0.362198	-0.108759
TRIB3					0.89526	0.642848	-0.252412	0.275184	0.206573	-0.0686108	0.936242	0.720887	-0.215355	0.893578	0.65353	-0.240047
TRIM25		0.0544473	0.0526472	-0.00180017	0.871388	0.748168	-0.12322	0.019066	0.0163627	-0.0027033	0.344692	0.272946	-0.0717454	0.053392	0.0544314	0.00103944	0.027209	0.0243134	-0.00289557
TRIM38					0.923514	0.667714	-0.255801	0.283132	0.218097	-0.0650354	0.819807	0.484761	-0.335047	0.623861	0.402306	-0.221554	0.0706902	0.0655503	-0.00513989
TRIM43											0.477143	0.394961	-0.0821819	0.473825	0.369985	-0.103839
TRIM55	up							0.897277	0.54131	-0.355967	0.775021	0.54946	-0.225561	0.818284	0.56548	-0.252804	0.897601	0.564354	-0.333247
TRIM59	up	0.0564192	0.0508451	-0.00557404	0.881101	0.625734	-0.255367	0.0655006	0.0670852	0.00158463	0.80688	0.588797	-0.218083	0.717973	0.426687	-0.291286	0.301637	0.244386	-0.0572505
TRIM60	up							0.674249	0.508996	-0.165253	0.809954	0.633262	-0.176691	0.899201	0.716448	-0.182753	0.714268	0.565241	-0.149027
TRIM65		0.0888467	0.091117	0.00227032	0.89844	0.778703	-0.119737				0.816949	0.639661	-0.177288	0.82061	0.559093	-0.261517	0.547636	0.449721	-0.0979146
TRIML2	up				0.337721	0.256327	-0.0813946				0.622203	0.479575	-0.142627	0.618035	0.470126	-0.147909
TRIP13		0.0178204	0.0166611	-0.00115924	0.88596	0.641784	-0.244176				0.449308	0.335532	-0.113775	0.141775	0.106543	-0.0352322	0.103524	0.115012	0.0114879
TRMT6					0.91034	0.651243	-0.259097				0.874127	0.709824	-0.164303
TRNP1	up	0.0226772	0.0203032	-0.00237402	0.461844	0.334372	-0.127472	0.0327179	0.0309708	-0.00174707				0.25275	0.201381	-0.051369	0.0336817	0.0297081	-0.00397362
TSC22D3		0.170733	0.14624	-0.0244929	0.907676	0.699949	-0.207728	0.0508016	0.0459366	-0.00486503	0.420738	0.32663	-0.0941086	0.210219	0.159609	-0.0506095	0.0643025	0.0664542	0.00215175
TSEN15		0.0917074	0.0667826	-0.0249248	0.809079	0.579732	-0.229347				0.375306	0.274729	-0.100576	0.0936317	0.0870947	-0.006537	0.0612082	0.0663564	0.00514819
TSKU					0.907605	0.643388	-0.264217	0.302296	0.200545	-0.101751	0.889654	0.688542	-0.201112	0.296479	0.216943	-0.0795356	0.0467566	0.0442314	-0.00252516
TSPAN13	up	0.0867526	0.0841036	-0.00264903							0.287145	0.225321	-0.0618238	0.120381	0.112692	-0.00768898	0.0657346	0.0678315	0.00209693
TSPAN2	up	0.187581	0.164499	-0.0230824							0.491013	0.389766	-0.101246	0.655977	0.470479	-0.185498	0.23778	0.192598	-0.0451817
TSPYL2	up	0.0435697	0.0410809	-0.00248876	0.907378	0.727881	-0.179497				0.838246	0.626506	-0.21174	0.0700966	0.0753063	0.00520973	0.0497049	0.038953	-0.0107518
TUBA3E	up	0.964311	0.754395	-0.209916							0.706063	0.557027	-0.149036	0.787701	0.568278	-0.219423	0.847397	0.640195	-0.207202
TUBD1					0.526515	0.475424	-0.0510917	0.319838	0.248268	-0.0715699	0.915184	0.746884	-0.168299	0.0216221	0.0200024	-0.00161968	0.0784298	0.0678401	-0.0105897
TUBE1								0.0216176	0.0227381	0.00112051	0.0590634	0.0611115	0.00204815	0.152876	0.112709	-0.0401669	0.0724817	0.0728088	0.000327117
TUBG1											0.81197	0.559704	-0.252266
TUBG2								0.0591605	0.0556894	-0.00347117	0.356268	0.288777	-0.0674908	0.878152	0.719554	-0.158598	0.0729937	0.0741002	0.00110652
TUFT1					0.93287	0.649751	-0.283119				0.375601	0.297605	-0.0779965	0.468954	0.332575	-0.136379	0.06849	0.0664191	-0.00207094
TXNDC16					0.901942	0.679131	-0.222811	0.309671	0.249874	-0.059797	0.924068	0.633507	-0.290561	0.0591735	0.0686105	0.00943702	0.0090744	0.00473004	-0.00434436
TXNIP		0.132793	0.11784	-0.0149526	0.911816	0.604132	-0.307684				0.0651535	0.0615225	-0.00363098	0.0565841	0.0531983	-0.00338571	0.0609959	0.0640497	0.00305374
UBB		0.0431244	0.0430847	-3.964e-05				0.0830887	0.091867	0.00877834	0.272749	0.233771	-0.0389781	0.0960183	0.0938414	-0.00217691	0.0555187	0.054763	-0.00075579
UBE2T		0.0457376	0.0444324	-0.00130517				0.044482	0.0424484	-0.00203356							0.032695	0.0334959	0.000800861
UCA1	up										0.0897545	0.0938946	0.00414007	0.192336	0.172443	-0.0198931
UCHL1	up	0.957063	0.719016	-0.238047	0.873665	0.690029	-0.183636				0.780258	0.620676	-0.159582	0.854709	0.675316	-0.179393	0.643059	0.516349	-0.126709
UCP2		0.0253572	0.0229912	-0.00236603	0.964203	0.639547	-0.324656	0.720106	0.621783	-0.0983234	0.918746	0.683215	-0.235531	0.268217	0.21277	-0.0554473	0.0455317	0.0454999	-3.18079e-05
UGCG											0.416547	0.311125	-0.105422	0.33911	0.271709	-0.0674006	0.0662869	0.0720532	0.00576637
UGT2B10		0.468416	0.34753	-0.120886
UGT2B7		0.553779	0.420223	-0.133556							0.163713	0.117028	-0.046685	0.349148	0.244163	-0.104985
UGT8								0.516054	0.418586	-0.0974683	0.726892	0.542057	-0.184835	0.833023	0.617944	-0.215079	0.534045	0.489646	-0.0443985
UHRF1					0.987219	0.827543	-0.159677	0.0296512	0.0306085	0.000957251	0.808168	0.610449	-0.197719	0.596682	0.506325	-0.0903562	0.0434513	0.0400023	-0.00344893
UHRF1BP1		0.108729	0.104557	-0.00417158	0.909052	0.598441	-0.310612				0.489784	0.367828	-0.121955	0.247587	0.201277	-0.0463097	0.0974388	0.0943917	-0.00304715
ULBP1	up				0.0841358	0.075916	-0.00821984	0.912576	0.653975	-0.2586	0.613137	0.398817	-0.21432	0.673594	0.483919	-0.189675	0.743204	0.587468	-0.155736
ULBP3		0.0282653	0.0277912	-0.000474033							0.432732	0.328633	-0.104099	0.0855041	0.073535	-0.0119691	0.0597058	0.0598873	0.000181445
UNC5B		0.0176963	0.00985733	-0.00783902	0.655173	0.493211	-0.161962				0.434171	0.318985	-0.115187	0.220437	0.182748	-0.0376895	0.0171361	0.0179179	0.000781838
UNG		0.0714964	0.0689997	-0.00249671	0.57339	0.414319	-0.15907	0.0921906	0.0874018	-0.00478884	0.929863	0.664533	-0.26533	0.341873	0.253831	-0.0880418	0.0290229	0.0329496	0.00392672
UPK1B					0.409432	0.294441	-0.114991	0.667285	0.538717	-0.128568	0.269819	0.204868	-0.0649508	0.665287	0.526672	-0.138615	0.858217	0.63424	-0.223977
UPP1					0.944232	0.680999	-0.263234	0.057663	0.053821	-0.00384201	0.932501	0.586684	-0.345817	0.060793	0.0631163	0.00232325	0.0740829	0.0751636	0.0010807
USP2		0.38347	0.341623	-0.0418473	0.0447775	0.04785	0.00307253	0.635157	0.471024	-0.164133	0.331063	0.274322	-0.0567404	0.387165	0.301423	-0.0857421	0.141229	0.131863	-0.00936567
USP26		0.044351	0.0574743	0.0131233
VAMP1		0.00698321	0.00763468	0.000651469	0.846568	0.620312	-0.226256				0.666999	0.535518	-0.13148	0.104365	0.0859006	-0.0184642	0.0515137	0.0541398	0.00262618
VCAM1	up	0.907888	0.715323	-0.192565	0.863213	0.617772	-0.24544				0.840698	0.576419	-0.264279	0.573283	0.415112	-0.158171
VCAN	up	0.945991	0.658848	-0.287143				0.292188	0.22935	-0.0628372	0.608994	0.449562	-0.159432	0.835977	0.622318	-0.213659	0.908813	0.66452	-0.244293
VCL		0.0444895	0.0524305	0.00794106	0.835121	0.652472	-0.182649				0.63433	0.482187	-0.152143	0.375629	0.30272	-0.0729084	0.0265033	0.0267404	0.000237081
VCX3B	up	0.535301	0.386615	-0.148686				0.661153	0.563812	-0.0973408	0.276237	0.226301	-0.0499364	0.665529	0.525539	-0.13999
VEGFA		0.0291628	0.0322016	0.00303877	0.898122	0.708158	-0.189964				0.503086	0.378624	-0.124462	0.609622	0.444671	-0.16495	0.0804816	0.0789234	-0.00155818
VEZF1								0.0533409	0.0517519	-0.00158891	0.344383	0.258956	-0.0854274	0.329258	0.243155	-0.0861029	0.031839	0.0348147	0.00297575
VGLL3	up	0.108053	0.0907418	-0.0173117				0.0862656	0.0985944	0.0123288	0.603721	0.433726	-0.169995	0.0597145	0.0643684	0.00465398	0.0446359	0.0417376	-0.00289837
VIPR1	down	0.0538056	0.0569652	0.00315961	0.513982	0.425999	-0.0879833				0.643074	0.49994	-0.143134	0.166054	0.140724	-0.0253301	0.0555407	0.0537398	-0.00180083
VLDLR		0.0725025	0.0595591	-0.0129435							0.810525	0.585495	-0.22503	0.299494	0.215117	-0.0843773
VSIG1	up	0.875184	0.718953	-0.156232	0.503877	0.37889	-0.124987				0.218384	0.183206	-0.0351783	0.400811	0.302658	-0.0981527
VSNL1		0.0800842	0.0710885	-0.00899574	0.887738	0.653828	-0.23391	0.589451	0.460707	-0.128744	0.525097	0.378329	-0.146767	0.0850602	0.0796383	-0.0054219	0.0869505	0.0847519	-0.00219861
VTCN1											0.228819	0.176428	-0.0523908	0.321786	0.228211	-0.0935753	0.157189	0.132191	-0.0249978
WARS		0.0665378	0.0586433	-0.00789448				0.929659	0.681157	-0.248502	0.860467	0.668391	-0.192075	0.419213	0.321971	-0.0972418	0.0586715	0.0607104	0.00203882
WDR41		0.030267	0.0360046	0.00573756	0.903143	0.644955	-0.258188				0.148122	0.106788	-0.0413341	0.095523	0.0846176	-0.0109054
WDR44		0.0447451	0.0470613	0.00231619							0.503143	0.374011	-0.129132	0.0610612	0.0610547	-6.5275e-06	0.0205098	0.019718	-0.000791806
WDR76					0.903623	0.648583	-0.25504	0.0783281	0.0704985	-0.00782965	0.72664	0.521548	-0.205092	0.858732	0.705763	-0.15297	0.0343747	0.029818	-0.00455665
WIPI1					0.912935	0.688214	-0.224721				0.389565	0.288137	-0.101429	0.0271255	0.0307055	0.00357992	0.0523874	0.0551633	0.00277583
WISP1		0.695427	0.526688	-0.16874	0.837654	0.698847	-0.138807	0.356005	0.251751	-0.104254	0.548715	0.407014	-0.141701	0.737579	0.563259	-0.17432	0.552143	0.430063	-0.12208
WNT6					0.285499	0.209393	-0.0761055				0.599519	0.458277	-0.141242	0.562093	0.456312	-0.10578	0.773497	0.666429	-0.107068
WTIP		0.0655592	0.068948	0.00338875	0.687216	0.580906	-0.10631				0.740562	0.570142	-0.17042	0.540518	0.440416	-0.100102
XAF1								0.131924	0.110499	-0.0214251	0.370044	0.298206	-0.0718382	0.80305	0.593776	-0.209273	0.37808	0.312443	-0.0656365
XBP1		0.0480742	0.0467053	-0.00136888	0.564258	0.425085	-0.139173				0.0517781	0.0496339	-0.00214413	0.546198	0.482378	-0.0638207	0.0318438	0.0312327	-0.000611134
XDH					0.867198	0.595208	-0.27199				0.53946	0.400889	-0.138571	0.671884	0.499753	-0.172131	0.773058	0.524427	-0.248631
XG					0.453646	0.323242	-0.130404				0.615339	0.531667	-0.0836723
XIST	up										0.664727	0.570608	-0.0941193	0.634831	0.498465	-0.136365	0.744549	0.564956	-0.179593
XKR9								0.0523344	0.0532323	0.000897933	0.65441	0.594652	-0.0597584				0.0343026	0.0373984	0.00309582
YARS		0.0161064	0.0236988	0.0075924							0.747346	0.57724	-0.170107	0.0867378	0.0833021	-0.00343568	0.0314845	0.0312875	-0.000197032
YY2		0.847047	0.616562	-0.230484										0.825827	0.520629	-0.305198	0.904203	0.783759	-0.120444
ZBTB7C		0.678294	0.547177	-0.131116	0.72209	0.482589	-0.239502				0.725419	0.532596	-0.192823	0.050102	0.055366	0.00526403	0.222179	0.189734	-0.0324455
ZC3H6								0.0802681	0.0818862	0.00161808	0.439495	0.34948	-0.0900156	0.223502	0.209147	-0.0143544	0.0470578	0.0510038	0.00394601
ZC3H8		0.0594383	0.061645	0.00220676				0.01679	0.0215683	0.00477832	0.471364	0.309817	-0.161548	0.584622	0.507921	-0.0767015
ZC3HAV1		0.0632178	0.0614971	-0.0017207	0.653431	0.498461	-0.154971				0.672017	0.516275	-0.155742	0.44445	0.316611	-0.127839	0.0665065	0.0608412	-0.0056653
ZCCHC2		0.066647	0.0677489	0.00110191	0.90311	0.658345	-0.244765				0.134809	0.0995797	-0.0352296	0.0775117	0.0646811	-0.0128306	0.0475118	0.0497913	0.00227955
ZDBF2	up							0.651342	0.590569	-0.0607729	0.541159	0.31948	-0.221679	0.589339	0.456266	-0.133073	0.458599	0.417179	-0.04142
ZFAND1											0.0689686	0.0747703	0.00580178	0.598045	0.440334	-0.157711	0.0479994	0.049101	0.00110154
ZFAND3		0.00253427	0.00471582	0.00218155	0.902582	0.638157	-0.264425				0.780827	0.535536	-0.24529	0.0505013	0.0501668	-0.000334478	0.0394179	0.0371643	-0.00225367
ZFHX4								0.547711	0.391145	-0.156567	0.896915	0.69494	-0.201975	0.65374	0.43551	-0.218231
ZFP28		0.0232795	0.0172548	-0.00602477	0.901867	0.665841	-0.236026				0.336388	0.262167	-0.0742206	0.0728953	0.0627468	-0.0101484
ZFP3					0.496914	0.382924	-0.11399	0.268477	0.223969	-0.0445076				0.378565	0.308426	-0.0701386	0.371353	0.313475	-0.0578788
ZFP30								0.461292	0.377792	-0.0834995	0.8814	0.556246	-0.325154	0.277133	0.221901	-0.0552324	0.0181186	0.0211924	0.00307383
ZFP36L1		0.0437548	0.0482501	0.00449537	0.255783	0.215939	-0.0398442	0.00700331	0.00194163	-0.00506167	0.0443839	0.0473328	0.00294882	0.0787407	0.0813006	0.00255995	0.0912932	0.0919536	0.000660443
ZFP42	up	0.723766	0.626412	-0.0973538				0.648027	0.495006	-0.153021	0.850628	0.618218	-0.23241	0.894305	0.722188	-0.172117	0.810697	0.669167	-0.14153
ZFP57		0.403192	0.30442	-0.0987725							0.384292	0.3216	-0.0626919	0.292734	0.257182	-0.0355527	0.186519	0.151621	-0.0348986
ZFP82					0.922967	0.634458	-0.28851	0.249652	0.198321	-0.0513315	0.925192	0.722776	-0.202416	0.302682	0.233306	-0.0693756	0.0911454	0.0956359	0.00449048
ZIC5		0.847315	0.655035	-0.192281	0.752851	0.535345	-0.217507				0.854242	0.651523	-0.20272	0.903707	0.721353	-0.182354	0.833474	0.585043	-0.248432
ZIK1	up				0.119158	0.100348	-0.0188104	0.957815	0.773723	-0.184092	0.324477	0.249937	-0.0745394	0.682	0.529502	-0.152498	0.817629	0.634168	-0.18346
ZMYM3					0.89413	0.711396	-0.182734	0.0523184	0.0552057	0.00288726	0.905613	0.76586	-0.139753	0.0652118	0.0683024	0.00309069
ZNF10	up	0.0853294	0.085351	2.161e-05	0.886513	0.656978	-0.229536	0.265395	0.213504	-0.051891	0.740782	0.621281	-0.1195	0.0878685	0.0911166	0.00324809	0.0497693	0.0486415	-0.00112786
ZNF100		0.325503	0.294935	-0.0305676							0.41291	0.316158	-0.0967519				0.105787	0.0978549	-0.00793248
ZNF114					0.840336	0.697855	-0.14248	0.447914	0.36109	-0.0868234	0.777474	0.556984	-0.22049	0.0117758	0.0155467	0.00377091	0.0481139	0.050225	0.0021111
ZNF143		0.0781372	0.0876035	0.00946639	0.758638	0.597817	-0.160822	0.246378	0.204938	-0.0414401	0.477225	0.347274	-0.129951	0.0623892	0.0567619	-0.00562725	0.0388014	0.0389839	0.000182468
ZNF157		0.595381	0.434211	-0.16117							0.394704	0.328296	-0.0664087	0.624568	0.470185	-0.154384	0.28158	0.209373	-0.0722075
ZNF208	up				0.294317	0.21639	-0.0779264				0.194163	0.160812	-0.0333507				0.430153	0.37701	-0.0531433
ZNF221								0.489251	0.358564	-0.130687	0.895995	0.684095	-0.2119	0.0495618	0.0503225	0.000760674	0.0485218	0.0485187	-3.07333e-06
ZNF229	up				0.288657	0.248749	-0.0399077	0.313749	0.267061	-0.0466878				0.0692042	0.0618276	-0.00737654	0.628443	0.48805	-0.140393
ZNF25	down							0.248117	0.210124	-0.037993				0.0490323	0.0403037	-0.00872851	0.0382796	0.0361647	-0.00211489
ZNF280C		0.053653	0.0408363	-0.0128168	0.914248	0.663051	-0.251197	0.240732	0.199094	-0.041638	0.876969	0.736615	-0.140353	0.759815	0.585222	-0.174593	0.28576	0.248472	-0.0372879
ZNF283	up	0.245394	0.220574	-0.0248207				0.345752	0.259137	-0.0866145	0.772269	0.649595	-0.122674	0.825749	0.595703	-0.230046	0.293173	0.24567	-0.0475024
ZNF284								0.102383	0.091445	-0.0109378	0.834952	0.737018	-0.0979334	0.332583	0.246169	-0.086414	0.034075	0.0356325	0.0015575
ZNF300	up							0.190991	0.128414	-0.0625767	0.232465	0.174439	-0.0580261	0.586086	0.450039	-0.136047	0.591004	0.468232	-0.122772
ZNF320					0.616109	0.533853	-0.0822557	0.808283	0.655694	-0.152589				0.85393	0.644215	-0.209715	0.812468	0.529696	-0.282772
ZNF331		0.279829	0.242024	-0.0378042	0.885634	0.703948	-0.181686	0.801806	0.612874	-0.188933	0.605368	0.468542	-0.136826	0.549204	0.440743	-0.108461	0.323176	0.271889	-0.0512872
ZNF343					0.903975	0.687325	-0.21665	0.267935	0.226395	-0.0415393	0.932035	0.729963	-0.202072	0.380847	0.263777	-0.11707	0.0245255	0.0229052	-0.00162037
ZNF345		0.0515477	0.0458025	-0.00574517				0.338743	0.265	-0.0737427							0.0909202	0.0891898	-0.00173044
ZNF350		0.0131744	0.0151973	0.00202287				0.091654	0.0900908	-0.0015632	0.928663	0.640981	-0.287681	0.372521	0.264374	-0.108147	0.057847	0.0552941	-0.00255296
ZNF383								0.554461	0.478506	-0.0759544	0.918318	0.680201	-0.238117	0.910159	0.680691	-0.229468
ZNF385A					0.710222	0.573805	-0.136417	0.8339	0.700185	-0.133715	0.563282	0.454718	-0.108564	0.908148	0.744131	-0.164017	0.703812	0.56254	-0.141272
ZNF404	up	0.537952	0.434882	-0.10307										0.0792298	0.0774058	-0.00182403
ZNF431					0.931165	0.760697	-0.170467				0.0554902	0.062225	0.00673484	0.660746	0.460579	-0.200167	0.337415	0.306889	-0.0305263
ZNF441		0.09542	0.0947672	-0.000652765	0.917113	0.737834	-0.179279				0.0577588	0.0594894	0.00173061	0.773635	0.628892	-0.144743	0.0616015	0.058089	-0.00351252
ZNF45	up	0.910169	0.61293	-0.297238	0.859681	0.594303	-0.265378	0.925379	0.7209	-0.204478	0.856287	0.559127	-0.29716	0.911998	0.663107	-0.248891	0.871304	0.660153	-0.211151
ZNF469		0.80488	0.624065	-0.180815	0.915772	0.717708	-0.198064				0.63894	0.529574	-0.109367	0.441806	0.378731	-0.0630753	0.529856	0.43651	-0.0933462
ZNF546	up				0.875799	0.658633	-0.217166	0.0663795	0.0567034	-0.00967607	0.877944	0.654168	-0.223776	0.0855488	0.0855822	3.34e-05	0.0399098	0.0441626	0.00425287
ZNF559	up	0.135216	0.13206	-0.00315588	0.83838	0.567882	-0.270498	0.928056	0.726614	-0.201443	0.909383	0.641723	-0.26766	0.174803	0.132786	-0.0420174	0.0426653	0.0444709	0.00180557
ZNF560	up							0.454639	0.358488	-0.0961512	0.332207	0.229497	-0.102709	0.498268	0.374614	-0.123654	0.62759	0.475192	-0.152398
ZNF566		0.0701077	0.0731463	0.00303861	0.893661	0.629146	-0.264515	0.170067	0.16471	-0.0053569	0.916616	0.614591	-0.302025	0.0582458	0.0602643	0.00201848	0.0323243	0.0327224	0.000398182
ZNF568								0.197612	0.142616	-0.0549959	0.798747	0.646131	-0.152616	0.697971	0.461381	-0.236589	0.0322085	0.0258236	-0.00638488
ZNF570	up							0.052204	0.0547652	0.00256121	0.9495	0.748673	-0.200827	0.789624	0.543014	-0.24661	0.260698	0.196054	-0.0646449
ZNF582	up							0.165474	0.149593	-0.0158816				0.71088	0.514516	-0.196364	0.557634	0.506038	-0.0515964
ZNF595	up										0.324438	0.284585	-0.0398528	0.410977	0.34632	-0.0646568
ZNF607	up				0.724903	0.518761	-0.206142	0.18945	0.148052	-0.0413979				0.307144	0.23918	-0.0679642	0.077782	0.0689249	-0.00885714
ZNF676											0.124389	0.105656	-0.018733
ZNF695		0.522104	0.453509	-0.0685953	0.809326	0.643946	-0.16538				0.575443	0.395581	-0.179862	0.517099	0.415796	-0.101303	0.633494	0.569418	-0.0640762
ZNF699	up													0.850131	0.58903	-0.261102	0.902416	0.57435	-0.328066
ZNF702P											0.28329	0.230769	-0.0525212	0.21784	0.200556	-0.0172839	0.125069	0.132332	0.00726267
ZNF732	up										0.167116	0.14463	-0.0224859	0.525841	0.41862	-0.107221
ZNF738											0.235849	0.21355	-0.0222986	0.853755	0.67384	-0.179915	0.339765	0.285083	-0.0546815
ZNF774		0.00608522	0.00890641	0.00282119	0.838006	0.620097	-0.217909	0.0566888	0.0540563	-0.00263249	0.940023	0.762973	-0.17705	0.608595	0.483777	-0.124818	0.0745781	0.0760633	0.0014852
ZNF780A		0.0737079	0.0819745	0.00826661	0.862825	0.69102	-0.171804	0.340366	0.253931	-0.0864358	0.897751	0.647546	-0.250205	0.0387828	0.0402558	0.00147301	0.0493194	0.0489375	-0.000381897
ZNF780B		0.0281117	0.0346127	0.00650093	0.877011	0.665518	-0.211493	0.0204108	0.00784615	-0.0125646	0.917367	0.726713	-0.190654	0.0158947	0.0164788	0.000584102	0.0486928	0.0511724	0.00247958
ZNF781	up							0.745637	0.554211	-0.191425	0.332466	0.20515	-0.127317	0.558897	0.439053	-0.119844	0.767596	0.551837	-0.215758
ZNF788	up										0.188762	0.164396	-0.024366	0.871865	0.693624	-0.178241	0.0641141	0.0544919	-0.00962228
ZNF804A		0.0827312	0.080067	-0.00266419							0.434288	0.326051	-0.108237	0.758074	0.529787	-0.228287	0.441552	0.398191	-0.0433611
ZNF814		0.8101	0.576301	-0.233799	0.930639	0.671657	-0.258982				0.861838	0.633201	-0.228637	0.651992	0.547556	-0.104436	0.893757	0.671305	-0.222452
ZNF827					0.901523	0.667237	-0.234285				0.568953	0.428898	-0.140055	0.0519348	0.0509221	-0.00101272	0.078147	0.06925	-0.00889703
ZNF829	up	0.0791579	0.0742414	-0.00491644							0.900641	0.827456	-0.073185	0.0803903	0.0733725	-0.00701784
ZNF844	up				0.856622	0.624926	-0.231697	0.077749	0.0803174	0.00256838	0.305932	0.255445	-0.0504867	0.161219	0.124683	-0.0365363	0.0430748	0.0408069	-0.00226791
ZNF860								0.362256	0.272112	-0.0901444	0.874364	0.713456	-0.160908				0.0615947	0.0540822	-0.00751258
ZNF878	up	0.627861	0.525779	-0.102082							0.073799	0.0678928	-0.00590619	0.740677	0.639686	-0.100991	0.677662	0.535363	-0.142299
ZRANB3	down	0.0910364	0.0746961	-0.0163404				0.902517	0.646606	-0.255911	0.869719	0.656676	-0.213043
ZSCAN5B		0.0634398	0.0585046	-0.00493527	0.257706	0.185386	-0.0723205				0.845686	0.63374	-0.211946	0.497372	0.396809	-0.100563
ZXDB		0.272776	0.212525	-0.0602504										0.075768	0.0713786	-0.00438944	0.059764	0.0474537	-0.0123103
ZYG11A		0.625167	0.537784	-0.0873827	0.89339	0.558075	-0.335315				0.659843	0.558368	-0.101475	0.723316	0.528979	-0.194338	0.582704	0.421005	-0.161698
ZYX								0.000914679	0.00475304	0.00383836	0.622717	0.453056	-0.169662	0.25179	0.190022	-0.0617688	0.0716931	0.0666089	-0.00508424

## Sheet: 468
		1stExon	1stExon	1stExon	3'UTR	3'UTR	3'UTR	5'UTR	5'UTR	5'UTR	Body	Body	Body	TSS1500	TSS1500	TSS1500	TSS200	TSS200	TSS200
Row Labels	Gene expression Regulation by decitabine in MDA-MB-468	B.Value 468 NT	B.Value 468 DAC	DAC-NT	B.Value 468 NT	B.Value 468 DAC	DAC-NT	B.Value 468 NT	B.Value 468 DAC	DAC-NT	B.Value 468 NT	B.Value 468 DAC	DAC-NT	B.Value 468 NT	B.Value 468 DAC	DAC-NT	B.Value 468 NT	B.Value 468 DAC	DAC-NT
AADAC		0.850704	0.791013	-0.059691							0.868029	0.831771	-0.036258	0.701956	0.634713	-0.067243
AADACL3	up				0.359513	0.36559	0.00607713	0.553293	0.542121	-0.0111725	0.215297	0.20861	-0.00668663	0.407131	0.398118	-0.00901285	0.458763	0.446552	-0.0122116
AARS		0.0116221	0.00781917	-0.00380294	0.8106	0.792512	-0.0180875	0.467278	0.446336	-0.0209415	0.83931	0.827337	-0.0119723	0.165007	0.163348	-0.00165914	0.0241851	0.0253555	0.00117043
ABCA12	down				0.681679	0.661965	-0.0197137				0.85464	0.790567	-0.0640724	0.937547	0.872509	-0.065038	0.836094	0.79556	-0.0405343
ABCA2	down				0.774564	0.771998	-0.0025662				0.821749	0.805909	-0.0158397	0.103067	0.0995574	-0.00350939
ABCA5	up							0.433526	0.403735	-0.0297907	0.917597	0.843481	-0.0741162	0.597999	0.576138	-0.0218608	0.379226	0.361349	-0.0178763
ABCA6		0.0399027	0.0502042	0.0103015										0.0593225	0.0726439	0.0133214	0.0667079	0.0598813	-0.0068266
ABCA9					0.236589	0.273881	0.0372928	0.0485711	0.0698328	0.0212616	0.72816	0.733635	0.0054753	0.0550671	0.0619392	0.00687208	0.0557223	0.0452521	-0.0104701
ABCB1	up							0.590417	0.562746	-0.0276708	0.637592	0.587141	-0.0504515
ABCD3		0.0356575	0.0375845	0.001927	0.853238	0.824786	-0.0284522				0.0998587	0.108675	0.00881591	0.184154	0.181932	-0.00222171	0.0502813	0.049464	-0.000817323
ABCG1	down				0.741306	0.715402	-0.0259043	0.888102	0.868527	-0.0195752	0.581805	0.557462	-0.0243424	0.210135	0.20296	-0.00717484
ABCG2	up	0.341122	0.310421	-0.0307015				0.54079	0.504211	-0.0365795	0.173301	0.180322	0.00702107	0.0702073	0.071731	0.00152368	0.0470809	0.0441961	-0.00288477
ABHD3		0.0300018	0.0247556	-0.00524622							0.453953	0.424415	-0.0295385	0.603596	0.59368	-0.00991643	0.0422448	0.0389144	-0.00333034
ABL2	up	0.0864006	0.082533	-0.00386751	0.290974	0.230956	-0.0600178				0.632611	0.585076	-0.0475351	0.589993	0.534838	-0.0551552	0.0649235	0.0689831	0.00405953
ABLIM3	up				0.181186	0.165201	-0.0159848	0.497402	0.487184	-0.0102174	0.547646	0.541297	-0.00634884	0.854434	0.82806	-0.0263736	0.233531	0.237202	0.00367135
ACAD10	down				0.845176	0.831272	-0.0139036	0.214478	0.205998	-0.00848016	0.829135	0.814272	-0.0148625	0.0390003	0.0400072	0.0010069	0.048613	0.0447007	-0.00391237
ACBD7		0.0604575	0.0601105	-0.000347017							0.292143	0.264848	-0.0272951	0.176311	0.168017	-0.00829376	0.0711423	0.0700974	-0.00104493
ACE2	up	0.67296	0.642672	-0.0302873	0.444502	0.446003	0.0015006	0.884045	0.832538	-0.0515065	0.0547145	0.0481469	-0.00656758	0.751036	0.687379	-0.0636573	0.350316	0.331626	-0.0186901
ACRC	up										0.846194	0.797132	-0.0490621	0.751391	0.694269	-0.0571227	0.87237	0.831213	-0.0411568
ACSL1	down				0.722165	0.745955	0.0237904	0.248472	0.244277	-0.00419557	0.779655	0.749356	-0.0302985	0.360132	0.329825	-0.0303072	0.0662854	0.0594735	-0.00681185
ACTBL2	up	0.928553	0.876456	-0.0520975										0.88495	0.804075	-0.0808755	0.188386	0.137701	-0.0506852
ACVR1		0.0715426	0.0580677	-0.0134749				0.538418	0.50059	-0.0378278	0.78716	0.709884	-0.077276	0.105644	0.10672	0.00107593
ADAD1								0.869262	0.820101	-0.0491603	0.831193	0.803777	-0.0274156	0.846491	0.771634	-0.0748565
ADAMTS6		0.0526916	0.0522253	-0.000466353	0.0872279	0.0851416	-0.00208629	0.840278	0.760136	-0.0801414	0.229497	0.225929	-0.00356795	0.0681486	0.0740345	0.00588595	0.0521047	0.0486471	-0.00345766
ADCK1	down							0.271806	0.256358	-0.0154481	0.748305	0.717972	-0.0303337	0.896702	0.864892	-0.0318101	0.0605961	0.0611082	0.000512115
ADM	up				0.056066	0.0524241	-0.00364195	0.047658	0.0465518	-0.00110616	0.0792026	0.0789332	-0.000269403	0.0608892	0.0630147	0.00212545	0.0349646	0.0371791	0.00221444
ADRB2	up	0.173082	0.158987	-0.0140941										0.0962356	0.0955731	-0.000662473	0.0590425	0.0533436	-0.00569886
AGRN	down	0.0485073	0.0460417	-0.00246558	0.808416	0.780683	-0.0277326				0.770495	0.743952	-0.026543	0.0910903	0.0858738	-0.00521653	0.0675573	0.0748634	0.00730617
AIM1		0.0561859	0.054795	-0.0013909	0.88164	0.793023	-0.0886175				0.558646	0.498487	-0.0601586	0.303139	0.308417	0.00527754	0.0545674	0.059327	0.00475954
AIM2								0.154828	0.147997	-0.00683057				0.100779	0.0905385	-0.0102408	0.06085	0.0541385	-0.00671152
AKR1B10	down	0.216101	0.218724	0.002623	0.883009	0.835188	-0.0478215				0.440243	0.406092	-0.034151	0.888014	0.840112	-0.0479019	0.119512	0.120622	0.00111023
AKR1C2	down				0.853825	0.830064	-0.0237611	0.145753	0.152442	0.0066893	0.850009	0.800335	-0.0496741	0.468754	0.431961	-0.0367927	0.72798	0.70886	-0.0191198
ALDH1A1	down										0.713775	0.658157	-0.0556188	0.746933	0.763803	0.0168694
ALDH1L2											0.181501	0.176158	-0.00534342	0.850329	0.825321	-0.0250075	0.0352307	0.0383515	0.00312082
ALDH2	down	0.0156301	0.0194707	0.00384057	0.760867	0.774037	0.0131703	0.0581593	0.0577619	-0.000397385	0.321186	0.314071	-0.00711572	0.338984	0.320689	-0.0182948	0.309441	0.295566	-0.0138747
ALDH3B2	down	0.052755	0.0552143	0.00245934	0.834137	0.740367	-0.0937706	0.397985	0.379686	-0.0182991	0.67862	0.64614	-0.0324799	0.23692	0.234259	-0.00266109
ALKBH8								0.0608388	0.0643919	0.00355312	0.0456911	0.0509452	0.0052541	0.382331	0.33948	-0.0428507	0.0523054	0.0485998	-0.00370562
ALPK1	down	0.0619425	0.0541648	-0.0077777	0.761419	0.746685	-0.0147335	0.839661	0.80755	-0.0321111	0.891503	0.852095	-0.0394072				0.0416808	0.0435764	0.00189552
ALX1		0.509777	0.51304	0.00326277							0.387115	0.415695	0.0285801	0.530457	0.525022	-0.00543423	0.202273	0.192135	-0.0101387
ALX3		0.851158	0.831408	-0.01975	0.637383	0.629322	-0.00806193				0.87115	0.838092	-0.0330583	0.848115	0.833253	-0.0148621	0.918858	0.849137	-0.0697213
AMN1					0.838549	0.77573	-0.0628187	0.0569049	0.0588914	0.00198645	0.354959	0.33524	-0.0197199	0.402421	0.371955	-0.0304663	0.0763669	0.0754884	-0.000878518
AMOT	down	0.0323856	0.0282969	-0.00408871	0.883248	0.836951	-0.0462972	0.711673	0.689731	-0.0219425	0.121053	0.0998577	-0.0211954	0.0333254	0.0400952	0.00676976	0.387551	0.394318	0.00676684
ANGPT1	up	0.277418	0.278716	0.0012983	0.841762	0.821089	-0.0206731	0.287066	0.272113	-0.0149532	0.785728	0.738735	-0.0469929	0.872514	0.806088	-0.0664262	0.778456	0.721944	-0.056512
ANGPT2	up	0.968031	0.909982	-0.058049	0.795492	0.765566	-0.0299259	0.822598	0.785699	-0.0368995	0.890772	0.857027	-0.0337454	0.794895	0.740868	-0.0540273	0.838401	0.774852	-0.0635494
ANK1		0.30579	0.270411	-0.035379	0.490096	0.472557	-0.0175393				0.569327	0.551387	-0.0179401	0.422628	0.407514	-0.0151134	0.403785	0.381768	-0.0220171
ANK2		0.0730164	0.0718933	-0.00112308	0.315821	0.314135	-0.0016857	0.118508	0.11357	-0.00493816	0.475218	0.459785	-0.0154328	0.362819	0.351376	-0.0114437	0.135529	0.137517	0.00198824
ANKFN1		0.0541765	0.0573711	0.00319468							0.0701171	0.0766241	0.00650691	0.0601891	0.0673197	0.00713058	0.0706937	0.0745734	0.00387971
ANKH	down	0.0692087	0.0726301	0.00342136	0.883468	0.832718	-0.0507496				0.694561	0.654539	-0.0400222	0.27469	0.267473	-0.00721734	0.0515602	0.053777	0.00221672
ANKMY2					0.814694	0.781982	-0.0327129				0.783609	0.72902	-0.0545882
ANKRD1	up	0.0379841	0.0432842	0.00530018							0.892998	0.876612	-0.0163854	0.851622	0.802592	-0.04903	0.0651819	0.0472702	-0.0179117
ANKRD11					0.647448	0.642191	-0.00525637	0.772352	0.738415	-0.0339366	0.885838	0.847727	-0.038111	0.0536019	0.0514154	-0.0021865	0.0269207	0.0368485	0.00992784
ANKRD2	up	0.921812	0.908629	-0.0131837	0.871622	0.852949	-0.0186737	0.105908	0.112738	0.00683033	0.883185	0.86259	-0.020595	0.380104	0.364573	-0.0155313	0.0981093	0.0885734	-0.00953586
ANKRD22	down	0.0426919	0.0363262	-0.00636576	0.877098	0.859114	-0.0179843				0.3577	0.335202	-0.0224982	0.880714	0.772082	-0.108632	0.12216	0.106504	-0.0156564
ANKRD26P1											0.915644	0.850492	-0.0651515	0.505307	0.501867	-0.00344002	0.908702	0.878344	-0.0303578
ANO4		0.0758704	0.0761572	0.000286867	0.0901557	0.0761143	-0.0140414	0.0440506	0.0536516	0.00960098	0.0649882	0.0645742	-0.00041401	0.0472848	0.036609	-0.0106758	0.106593	0.108381	0.00178784
ANPEP	down				0.660431	0.664032	0.0036002	0.408656	0.405569	-0.00308666	0.821665	0.795362	-0.0263023	0.432388	0.411662	-0.0207257	0.0496012	0.0364171	-0.0131841
ANTXR2					0.365739	0.293803	-0.0719354	0.52792	0.524622	-0.00329821	0.379445	0.332074	-0.0473711				0.150247	0.133475	-0.0167724
ANXA3	up				0.82527	0.756878	-0.0683922	0.0356711	0.0333039	-0.00236716	0.750875	0.683439	-0.0674369	0.698054	0.666371	-0.0316833	0.51761	0.494591	-0.0230183
AOX1		0.900296	0.8772	-0.0230957							0.812006	0.768784	-0.0432213	0.880553	0.833619	-0.0469343	0.918224	0.869552	-0.0486718
APOD		0.667586	0.629193	-0.038393	0.79515	0.748014	-0.0471362				0.880429	0.892064	0.0116348	0.840004	0.818087	-0.021917
APOL6					0.850776	0.812277	-0.0384995	0.0839086	0.0836363	-0.00027232	0.445985	0.436702	-0.00928247	0.253964	0.253292	-0.000672511	0.130425	0.123953	-0.00647268
AR		0.209353	0.200173	-0.00917962	0.0548776	0.0597395	0.00486194				0.187498	0.179607	-0.00789121	0.140532	0.135298	-0.00523445	0.179787	0.186196	0.00640848
AREG	up	0.0398419	0.0383993	-0.00144257							0.40214	0.347059	-0.0550813	0.692253	0.699232	0.0069789
ARHGAP29		0.0272237	0.0295566	0.00233295				0.275249	0.273595	-0.00165409	0.885958	0.86117	-0.0247876	0.669913	0.634406	-0.0355071	0.0912118	0.0942881	0.00307621
ARHGDIB	up				0.919341	0.861478	-0.0578632	0.25767	0.238804	-0.0188664	0.883531	0.883527	-4.26667e-06	0.865854	0.811086	-0.0547674	0.291533	0.23906	-0.0524729
ARHGEF2					0.867462	0.854081	-0.0133814	0.0121947	0.010862	-0.00133268	0.569297	0.557678	-0.0116186	0.107849	0.106166	-0.00168293
ARHGEF6	down	0.066158	0.0757151	0.00955713	0.879939	0.812461	-0.0674776	0.0668198	0.0586529	-0.00816688	0.331251	0.317647	-0.0136045	0.32972	0.290782	-0.0389379	0.0604964	0.0680278	0.00753142
ARHGEF9	down	0.105471	0.0958503	-0.00962079	0.372946	0.360819	-0.0121264				0.445256	0.450917	0.00566095	0.210092	0.203291	-0.00680143	0.297539	0.290845	-0.00669374
ARL14	up	0.787941	0.716081	-0.0718606	0.905629	0.782344	-0.123285
ARRDC3					0.924293	0.854718	-0.069575	0.0600396	0.0563717	-0.00366785	0.815846	0.74286	-0.0729864
ART4	up							0.930666	0.874393	-0.0562737				0.875856	0.842442	-0.033414	0.884116	0.853324	-0.0307922
ASNS		0.0393567	0.0396854	0.000328771	0.604063	0.592771	-0.0112919	0.0912525	0.105223	0.0139706				0.76528	0.733022	-0.0322582	0.0468052	0.0467724	-3.28446e-05
ATAD2		0.0763404	0.0815355	0.00519512	0.911324	0.846086	-0.0652378				0.243657	0.233129	-0.0105285	0.0361231	0.0368427	0.00071965	0.0225603	0.0231204	0.000560114
ATAD5		0.0346126	0.0353132	0.000700647							0.048701	0.0393513	-0.00934965	0.320041	0.307031	-0.0130105	0.0205816	0.0235943	0.00301272
ATF3	up	0.0345924	0.0431916	0.00859913	0.792063	0.755686	-0.0363775	0.374436	0.362345	-0.0120909	0.883134	0.815659	-0.0674743	0.370805	0.367113	-0.00369225	0.212101	0.203994	-0.00810707
ATF4					0.613056	0.586745	-0.0263109	0.232821	0.235306	0.00248467	0.150236	0.143892	-0.00634323	0.119836	0.127611	0.00777516	0.0333198	0.0356344	0.00231462
ATF5					0.831995	0.804957	-0.0270384
ATF6B	down	0.0162704	0.0141452	-0.00212523							0.522446	0.504662	-0.0177836	0.50022	0.486315	-0.0139058	0.0807856	0.0820617	0.00127611
ATF7	down							0.345772	0.340471	-0.00530139	0.296235	0.263848	-0.0323876	0.54395	0.518897	-0.0250527	0.177033	0.197392	0.0203585
ATF7IP2	up				0.909237	0.847858	-0.0613788	0.85254	0.775261	-0.0772791				0.718643	0.674422	-0.0442211
ATG10	down							0.382412	0.365762	-0.0166498	0.700734	0.671587	-0.0291468	0.0945796	0.106499	0.011919	0.0144281	0.016161	0.00173284
ATP13A5	down	0.0576567	0.0599447	0.00228799							0.78465	0.752059	-0.0325906	0.733785	0.692844	-0.0409412	0.0566536	0.0564394	-0.000214271
ATP1B1		0.0590417	0.0631958	0.0041541							0.375629	0.349706	-0.025922	0.176652	0.161037	-0.0156149
ATP6V0A4	down	0.622874	0.63575	0.0128759	0.880628	0.812289	-0.0683394	0.497312	0.483133	-0.0141789	0.858371	0.816617	-0.0417531
ATP6V0C								0.017863	0.0151614	-0.00270158	0.106368	0.0977573	-0.00861029	0.613948	0.604931	-0.00901699	0.00464027	0.00513293	0.000492665
ATP6V0D1		0.0372221	0.042485	0.00526284	0.687366	0.653262	-0.0341049				0.629827	0.609285	-0.0205417	0.486888	0.468695	-0.0181928	0.00785839	0.00762385	-0.000234533
ATP6V0D2	down							0.300402	0.275731	-0.0246707	0.906365	0.790126	-0.11624	0.841026	0.783541	-0.0574853	0.296451	0.284617	-0.0118339
ATP6V1B1	down	0.094449	0.104724	0.0102746	0.914338	0.880457	-0.0338805				0.569419	0.544464	-0.0249558	0.332459	0.321895	-0.0105638
ATP8A1								0.541182	0.556054	0.0148725	0.128984	0.125826	-0.00315757	0.0976128	0.0983851	0.000772251	0.0350084	0.0342969	-0.000711549
ATP8B1		0.941967	0.886295	-0.0556722							0.941274	0.87545	-0.0658234	0.779556	0.737802	-0.0417537
ATP8B2	up				0.887659	0.871071	-0.0165875	0.645738	0.634081	-0.0116574	0.314378	0.316366	0.00198804	0.186119	0.183798	-0.00232075	0.559463	0.540364	-0.0190998
ATP9A	down				0.0909173	0.074758	-0.0161593				0.548975	0.522124	-0.026851	0.796689	0.737562	-0.0591274
AXL	up	0.561399	0.559893	-0.00150633				0.151521	0.142569	-0.00895185	0.180664	0.179319	-0.00134456	0.632275	0.623906	-0.0083692	0.307704	0.305201	-0.00250243
AZGP1	down				0.824286	0.786424	-0.0378618				0.360906	0.374526	0.0136196	0.640808	0.631036	-0.00977232	0.104883	0.112742	0.00785861
AZI2		0.0568803	0.0549391	-0.00194125				0.338269	0.310976	-0.0272926	0.879494	0.775473	-0.104021	0.0279493	0.0256087	-0.00234067	0.0886326	0.0784956	-0.0101371
BACH1	up							0.659874	0.625446	-0.0344285	0.841467	0.773474	-0.0679931	0.150028	0.143179	-0.00684955	0.0185433	0.0198403	0.001297
BBOX1	down							0.12223	0.125239	0.00300821	0.569352	0.583421	0.0140694	0.0958425	0.0946715	-0.001171	0.0508015	0.049547	-0.00125452
BCAS3	down				0.902041	0.868241	-0.0337996	0.178855	0.167867	-0.0109883	0.741401	0.702033	-0.0393677	0.0437343	0.0414315	-0.00230284	0.0527683	0.0482027	-0.00456555
BCL11B	down	0.0904585	0.0845857	-0.00587284	0.854045	0.816164	-0.0378811				0.651192	0.609181	-0.0420111	0.0372359	0.0409096	0.0036737	0.0487012	0.0513842	0.00268302
BCL2A1		0.619086	0.588907	-0.0301795							0.882095	0.843533	-0.0385617	0.865501	0.815208	-0.0502929
BCL2L11		0.0496169	0.0602363	0.0106194	0.912845	0.873361	-0.0394834	0.129115	0.130407	0.00129264	0.734365	0.714708	-0.0196577	0.486417	0.452176	-0.0342407	0.0300795	0.0309067	0.00082723
BCL2L13								0.194751	0.200889	0.0061387	0.0545931	0.0643328	0.00973971	0.0591481	0.0554092	-0.00373892	0.0625999	0.0606023	-0.00199757
BCORL1	up				0.897171	0.892809	-0.0043629	0.319505	0.304735	-0.0147692	0.855978	0.840485	-0.0154921	0.192184	0.183631	-0.00855243	0.0377989	0.0298377	-0.00796115
BDKRB1								0.642202	0.628821	-0.0133806	0.676554	0.633022	-0.0435324	0.642428	0.628636	-0.0137915	0.851103	0.827898	-0.023205
BEX1					0.131367	0.123782	-0.00758522	0.64729	0.644773	-0.00251754	0.782116	0.782436	0.000319167	0.220445	0.216628	-0.00381661	0.492298	0.482534	-0.00976377
BICC1	up	0.0549299	0.0605257	0.00559581	0.61336	0.596215	-0.017145				0.654235	0.627046	-0.0271895	0.952574	0.911279	-0.0412942	0.0674999	0.0723599	0.00486001
BIRC3	up	0.0795628	0.0820624	0.00249954	0.855512	0.794895	-0.0606165	0.0587736	0.057697	-0.00107663	0.865018	0.788195	-0.0768229	0.106658	0.0897912	-0.0168667	0.0499632	0.0510728	0.00110961
BLNK	down	0.100238	0.109197	0.00895932				0.0642939	0.0636031	-0.000690765	0.648539	0.612951	-0.0355885	0.540168	0.520503	-0.0196651	0.0451032	0.0339118	-0.0111914
BMP3	down	0.564512	0.550546	-0.0139665	0.897309	0.823611	-0.0736983				0.570299	0.536042	-0.0342571	0.742254	0.718117	-0.0241362	0.533422	0.527993	-0.00542928
BMP4	up	0.970421	0.919802	-0.0506195				0.309313	0.29949	-0.00982271	0.803039	0.792545	-0.0104948	0.920338	0.862925	-0.0574133	0.064788	0.071042	0.00625397
BNC1					0.199263	0.21384	0.0145767				0.366541	0.357434	-0.00910657	0.706487	0.687695	-0.0187913
BRDT	up							0.629216	0.611709	-0.0175065				0.881183	0.841467	-0.0397164	0.840322	0.805607	-0.0347148
BRI3BP		0.0340897	0.0318043	-0.00228541	0.920645	0.865757	-0.0548885				0.615706	0.591972	-0.0237335	0.0364738	0.0345988	-0.00187501	0.0436139	0.0531923	0.00957846
BRMS1L	up				0.888637	0.804705	-0.0839312	0.0412895	0.0419487	0.000659274	0.244739	0.218679	-0.0260595	0.337077	0.318731	-0.0183466	0.0508024	0.0499875	-0.000814937
BTBD2	down				0.782766	0.771122	-0.0116438				0.872016	0.859591	-0.0124253	0.7248	0.712017	-0.0127822
BTBD9	down				0.88108	0.843197	-0.0378827	0.465445	0.433815	-0.0316297	0.782404	0.729781	-0.0526233	0.170458	0.166509	-0.00394897	0.0657747	0.0639717	-0.00180306
BTG3	up				0.854142	0.747908	-0.106234	0.0748837	0.0764218	0.00153806	0.85581	0.788144	-0.0676654	0.747763	0.697636	-0.0501268	0.0198795	0.0177547	-0.00212483
BVES	up				0.792502	0.723874	-0.0686289	0.834874	0.770491	-0.064383	0.766107	0.68413	-0.0819767	0.248541	0.243963	-0.00457782
C10orf111					0.914103	0.830286	-0.0838177				0.0852894	0.0895621	0.00427274
C10orf25	up	0.468505	0.445847	-0.0226581	0.840306	0.788602	-0.0517046				0.906332	0.871371	-0.0349602				0.0711555	0.0637796	-0.00737595
C11orf80	down										0.713635	0.688638	-0.0249961	0.0608684	0.0644148	0.00354636	0.019423	0.0133507	-0.0060723
C12orf5											0.599072	0.570926	-0.0281452	0.071833	0.075016	0.00318303
C14orf159	down	0.0857266	0.0841368	-0.00158988	0.935115	0.899125	-0.0359899	0.554321	0.543713	-0.0106088	0.598837	0.562378	-0.0364592	0.479299	0.483088	0.00378947	0.0751515	0.0835294	0.00837787
C15orf48	up	0.175336	0.172522	-0.00281377				0.0541296	0.0541784	4.87533e-05	0.827741	0.777798	-0.0499428	0.446067	0.420528	-0.0255389	0.0421976	0.0421893	-8.29025e-06
C16orf74	down				0.097167	0.0908918	-0.00627524	0.329637	0.322433	-0.00720442	0.754323	0.728166	-0.0261574	0.244789	0.241205	-0.00358363
C17orf104	up	0.372302	0.356105	-0.016197							0.746038	0.728215	-0.0178233	0.380678	0.366632	-0.0140458	0.0513579	0.0542605	0.00290256
C17orf75		0.0123707	0.0183861	0.0060154	0.842559	0.725561	-0.116999				0.285593	0.291972	0.00637813	0.762636	0.729018	-0.0336181	0.124032	0.117583	-0.0064489
C19orf54		0.670581	0.657122	-0.013459	0.717211	0.720474	0.0032621				0.574026	0.579483	0.00545717	0.0581249	0.06032	0.00219511	0.34623	0.308771	-0.0374591
C1orf146	up							0.853934	0.81663	-0.0373043	0.802973	0.74308	-0.0598929	0.88164	0.837766	-0.043874	0.831955	0.793759	-0.0381959
C1orf168	down	0.118905	0.109562	-0.00934296							0.605012	0.597035	-0.00797698	0.676553	0.656752	-0.0198014	0.136126	0.128356	-0.00776956
C1RL	down				0.861149	0.861901	0.0007528				0.747482	0.718451	-0.029031	0.59663	0.575656	-0.0209739	0.0978511	0.09412	-0.00373119
C2orf88					0.510585	0.504635	-0.00595063	0.591426	0.590215	-0.00121111	0.906539	0.867077	-0.0394615	0.648086	0.614587	-0.0334992	0.817162	0.779029	-0.0381328
C3orf52	up	0.0746489	0.0764293	0.00178046	0.816908	0.794922	-0.0219863				0.372092	0.351242	-0.0208505	0.796343	0.78428	-0.0120625	0.4691	0.463339	-0.0057609
C4BPB	up	0.889876	0.824427	-0.065449				0.788693	0.759394	-0.0292991	0.450646	0.390927	-0.0597193	0.662017	0.575639	-0.0863781
C6orf203	down	0.0115532	0.0129556	0.00140242				0.104399	0.0974057	-0.00699282	0.780586	0.78104	0.0004544	0.916331	0.808431	-0.1079	0.0576051	0.0574937	-0.000111402
C6orf48								0.0762934	0.0747881	-0.00150526	0.301114	0.288994	-0.0121206	0.382393	0.368334	-0.0140591	0.037086	0.0409346	0.00384863
C9orf152	down							0.0687579	0.0592183	-0.00953953	0.850537	0.824865	-0.0256723				0.0488459	0.0517785	0.00293258
C9orf64		0.449495	0.439607	-0.0098884				0.467765	0.455268	-0.0124974	0.800957	0.747845	-0.0531116	0.631154	0.633339	0.0021857	0.455884	0.447718	-0.00816693
C9orf84	up										0.752854	0.705005	-0.0478492	0.807609	0.77345	-0.0341589	0.917567	0.801648	-0.115918
C9orf91					0.914178	0.859818	-0.0543605	0.32912	0.307343	-0.021777	0.858216	0.833739	-0.0244772	0.574744	0.502949	-0.0717952	0.0131137	0.011778	-0.00133565
CA5B					0.745363	0.747629	0.0022657	0.375438	0.366733	-0.00870426	0.769548	0.761429	-0.00811897	0.081212	0.080709	-0.000503037	0.0291841	0.0330301	0.0038459
CAB39L	down				0.858467	0.806329	-0.0521379	0.416988	0.397535	-0.0194528	0.759684	0.702365	-0.0573187				0.0413359	0.0361993	-0.00513666
CABLES1		0.0730622	0.0746641	0.00160183	0.0528272	0.0532804	0.000453197				0.511193	0.491692	-0.0195003	0.132898	0.126175	-0.00672299
CABYR	up	0.0444511	0.0446806	0.000229527	0.87077	0.789044	-0.0817263	0.168703	0.154805	-0.0138977	0.848843	0.801281	-0.0475621	0.847923	0.769203	-0.0787206	0.0638074	0.063462	-0.000345391
CACNA1D	down	0.320111	0.323521	0.00340966	0.890895	0.848556	-0.0423386				0.787151	0.752857	-0.0342942	0.037692	0.0388266	0.0011346	0.0279635	0.0253482	-0.00261529
CADM3					0.0712517	0.0752059	0.00395423	0.0103582	0.0110795	0.000721249	0.149522	0.147592	-0.00192963	0.0621177	0.0616768	-0.000440913	0.0727994	0.0635378	-0.00926155
CADPS2	down				0.825894	0.794461	-0.0314328	0.0764566	0.0806001	0.00414348	0.686464	0.656672	-0.0297921	0.14981	0.140593	-0.00921716	0.0454865	0.0444938	-0.00099264
CALB2	up										0.319331	0.296762	-0.0225691	0.17111	0.176726	0.00561604	0.00168078	0.0109119	0.00923116
CAPS	down				0.14758	0.140629	-0.00695137	0.0794033	0.0776425	-0.00176081	0.46	0.440214	-0.0197861	0.617799	0.607995	-0.00980401	0.115028	0.104708	-0.01032
CARS					0.129516	0.138478	0.00896233	0.0371593	0.0447928	0.00763358	0.593838	0.575119	-0.018719	0.0676909	0.0580352	-0.00965575	0.0451327	0.0474794	0.00234663
CASP14	down										0.93172	0.901026	-0.0306934	0.709026	0.700227	-0.00879883	0.867129	0.841086	-0.0260425
CASP2		0.0099836	0.0216975	0.0117139	0.796972	0.750606	-0.0463661				0.488436	0.470337	-0.0180984				0.0256621	0.0289978	0.00333566
CAT	down	0.0444849	0.0473816	0.00289662	0.97054	0.913124	-0.0574161				0.275423	0.265634	-0.00978855	0.0865881	0.0851885	-0.00139958	0.0606536	0.0609369	0.000283213
CATSPER2	down							0.931121	0.924322	-0.00679925	0.753138	0.716875	-0.0362637	0.637471	0.619839	-0.0176318	0.951849	0.940507	-0.0113413
CATSPERB	down							0.709413	0.692358	-0.0170552	0.597555	0.57098	-0.0265743	0.883584	0.838073	-0.0455108	0.872795	0.812019	-0.0607755
CAV1	up	0.0701651	0.0692854	-0.000879687	0.613702	0.58709	-0.0266119	0.0619861	0.0578244	-0.00416164	0.368318	0.35648	-0.0118385	0.317542	0.290875	-0.0266671	0.0622397	0.0621396	-0.000100055
CAV2	up	0.0105993	0.00925005	-0.00134928	0.896792	0.802315	-0.094477	0.0223062	0.0190756	-0.00323063	0.220782	0.212868	-0.0079139	0.733669	0.704809	-0.0288606	0.0738623	0.0728395	-0.00102285
CCDC102B								0.325892	0.308037	-0.0178558	0.178055	0.162776	-0.0152786	0.295839	0.283397	-0.0124424	0.0520986	0.0527817	0.000683106
CCDC144A	up	0.577095	0.573518	-0.00357753							0.726925	0.70074	-0.0261848	0.797894	0.744028	-0.0538656	0.125443	0.129729	0.00428631
CCDC152					0.744797	0.705377	-0.03942	0.829875	0.780982	-0.0488926	0.0380466	0.0463022	0.00825558	0.765054	0.728491	-0.0365633	0.82776	0.812681	-0.0150782
CCDC73	up							0.850459	0.814338	-0.0361212	0.879183	0.802519	-0.0766633	0.732049	0.656641	-0.0754081	0.71219	0.687419	-0.0247706
CCDC80	up	0.0929582	0.084726	-0.00823222	0.500537	0.490205	-0.0103318	0.0699913	0.0663909	-0.00360044	0.810684	0.774948	-0.0357362	0.649963	0.63657	-0.0133926
CCDC84	up	0.00469248	0.00507839	0.000385916							0.287537	0.254631	-0.0329054	0.0619952	0.0617621	-0.000233118	0.0281512	0.0265118	-0.0016394
CCL20	up	0.900286	0.843336	-0.0569502							0.857578	0.782565	-0.0750123	0.907481	0.859465	-0.0480161	0.832456	0.774247	-0.0582095
CCL28	down							0.0646584	0.062481	-0.00217741	0.0475664	0.04746	-0.000106368	0.77712	0.745462	-0.0316575	0.106487	0.0838005	-0.0226867
CCNA1	up	0.346427	0.346736	0.00030914	0.635586	0.579624	-0.0559624	0.591119	0.575826	-0.0152931	0.590408	0.578278	-0.0121296	0.712199	0.681256	-0.0309432
CCNB1IP1	up				0.838546	0.753985	-0.0845608	0.952558	0.882607	-0.0699508	0.870546	0.811559	-0.0589865	0.878965	0.774787	-0.104178	0.0387903	0.0411858	0.00239543
CCNE1		0.289618	0.298776	0.0091582	0.862417	0.845154	-0.0172635				0.872196	0.819721	-0.0524743	0.148337	0.145706	-0.00263115	0.0172589	0.0171531	-0.000105709
CCNE2		0.0262823	0.0282247	0.00194236				0.0919071	0.0990264	0.00711929	0.472954	0.450029	-0.0229252	0.0570669	0.0581719	0.00110502	0.0373531	0.0319603	-0.00539278
CCNYL1	up	0.100147	0.0961311	-0.00401638							0.612858	0.588962	-0.023895	0.0575644	0.0681633	0.0105989	0.0499346	0.0540165	0.00408186
CCR1	down	0.620246	0.598584	-0.0216628	0.944884	0.89166	-0.0532234	0.829819	0.810471	-0.0193481	0.845004	0.828332	-0.016672	0.833074	0.81546	-0.0176146	0.139439	0.127515	-0.0119236
CCR3	down	0.894526	0.856205	-0.0383216	0.806495	0.769948	-0.0365467	0.78998	0.743424	-0.0465558	0.920558	0.866563	-0.0539954	0.79451	0.782964	-0.0115459
CCRN4L	up	0.0455132	0.0354691	-0.0100441	0.842716	0.835618	-0.00709737				0.386821	0.375425	-0.011396	0.166831	0.156968	-0.00986354	0.0325806	0.0307342	-0.00184637
CD109								0.0433342	0.0443562	0.00102204	0.369633	0.354849	-0.0147845	0.753324	0.714557	-0.0387675	0.0559073	0.0714691	0.0155618
CD180		0.821749	0.793703	-0.0280459	0.415254	0.412656	-0.00259747				0.829238	0.80643	-0.0228077	0.801206	0.764023	-0.0371833	0.089342	0.129416	0.0400743
CD24														0.328707	0.378445	0.0497386
CD274	up							0.41578	0.398092	-0.0176882				0.149671	0.168816	0.0191452	0.0308968	0.0350998	0.00420296
CD55	up	0.0648039	0.0658515	0.00104753	0.722981	0.681561	-0.0414194				0.302379	0.273531	-0.028848	0.222584	0.211653	-0.0109313	0.0476028	0.0391715	-0.00843133
CD68	up	0.452018	0.446794	-0.00522427	0.927735	0.88492	-0.0428153				0.891025	0.884167	-0.00685817	0.526072	0.514292	-0.0117804	0.317464	0.268857	-0.0486071
CD9		0.0302644	0.0356696	0.00540523							0.435904	0.427854	-0.00805	0.820324	0.802262	-0.0180618	0.0449915	0.0452991	0.000307618
CDA	up	0.819927	0.796757	-0.0231697	0.815803	0.764632	-0.051171				0.524093	0.532968	0.00887461	0.727806	0.698478	-0.029328	0.83935	0.822855	-0.0164944
CDC14A					0.855339	0.830871	-0.0244678	0.076723	0.0756345	-0.00108853	0.592146	0.532721	-0.0594256	0.0591268	0.0581029	-0.00102389	0.0483339	0.0455473	-0.00278659
CDC25A	up	0.0879814	0.0837365	-0.00424494	0.704194	0.714829	0.0106351	0.0602308	0.0563492	-0.00388162	0.835099	0.823738	-0.0113615	0.466138	0.463908	-0.00222991	0.0470931	0.0463294	-0.000763658
CDC42EP1					0.79742	0.838436	0.0410158	0.267875	0.258378	-0.00949667	0.86031	0.849912	-0.0103978	0.403329	0.382989	-0.0203406	0.193129	0.203665	0.010536
CDC6		0.0270106	0.0240603	-0.00295036	0.0834689	0.0950783	0.0116093	0.0481105	0.0553021	0.00719156	0.698519	0.641713	-0.0568053	0.0476173	0.0419115	-0.00570581	0.0297019	0.0314084	0.00170642
CDH10		0.768771	0.750935	-0.017836				0.79316	0.757525	-0.0356343	0.728811	0.715515	-0.0132956	0.735164	0.679686	-0.0554781	0.732034	0.706648	-0.0253862
CDH12					0.770396	0.738011	-0.0323859	0.787167	0.753164	-0.0340034	0.897214	0.843562	-0.0536515	0.819298	0.724492	-0.0948057
CDH13		0.259028	0.249061	-0.00996712	0.68561	0.635092	-0.0505175				0.104553	0.10604	0.00148643	0.330372	0.319478	-0.0108942	0.232048	0.223316	-0.0087319
CDH18		0.0435481	0.0418522	-0.0016959	0.763144	0.737839	-0.0253048	0.762682	0.697999	-0.0646835	0.409808	0.394125	-0.0156829	0.553213	0.531167	-0.0220459	0.025309	0.0261544	0.000845315
CDH2	up	0.0669492	0.0703513	0.00340209							0.588578	0.568179	-0.0203989	0.0504088	0.0475043	-0.00290448	0.0159075	0.0190369	0.00312948
CDH3		0.050469	0.0427078	-0.0077612	0.872522	0.819483	-0.0530396				0.658551	0.637434	-0.021117	0.945847	0.873607	-0.0722401	0.848022	0.789301	-0.0587211
CDH4					0.810943	0.810479	-0.000464433				0.3126	0.306113	-0.0064876	0.413428	0.410765	-0.00266312
CDH5	up				0.821768	0.812682	-0.00908563	0.270081	0.259421	-0.0106608	0.722274	0.701425	-0.0208493	0.815789	0.808847	-0.00694282	0.773241	0.763446	-0.00979513
CDH6					0.826123	0.785207	-0.0409164	0.717376	0.711237	-0.00613933	0.852142	0.824079	-0.0280623	0.561803	0.570866	0.00906397	0.673678	0.680849	0.00717033
CDK1								0.0870195	0.0918268	0.00480731	0.576578	0.483212	-0.0933665	0.471598	0.448814	-0.0227837	0.0588107	0.0606893	0.00187863
CDK15					0.886634	0.77141	-0.115224	0.682474	0.661325	-0.0211492	0.754171	0.719724	-0.0344474	0.891149	0.865914	-0.025235	0.474392	0.47158	-0.00281147
CDK17					0.889923	0.839295	-0.0506283	0.257884	0.235812	-0.0220719	0.634956	0.603142	-0.0318131	0.0491052	0.0490453	-5.99356e-05	0.0891492	0.0929195	0.00377023
CDK2					0.340665	0.337324	-0.00334099	0.0908974	0.0882442	-0.00265324	0.366671	0.354284	-0.0123867	0.638348	0.621739	-0.0166085	0.0521973	0.0512652	-0.000932145
CDK6	up				0.568845	0.537965	-0.0308798	0.0526456	0.0530161	0.000370457	0.712772	0.670591	-0.0421804	0.70214	0.66984	-0.0322997	0.133127	0.133164	3.6916e-05
CDKAL1	down	0.0685671	0.0613606	-0.00720648	0.901987	0.855011	-0.0469756				0.798867	0.734062	-0.0648049	0.534007	0.4838	-0.0502066	0.0639742	0.0623631	-0.00161103
CDKN2C	down	0.0681072	0.0675951	-0.000512052				0.0378266	0.0430613	0.00523469	0.812983	0.73738	-0.0756033	0.128511	0.126921	-0.00158963	0.0242944	0.028592	0.00429755
CEBPG					0.857495	0.808194	-0.0493008	0.226098	0.213942	-0.0121559	0.978893	0.913951	-0.0649414	0.248237	0.232864	-0.0153732	0.00592309	0.00506946	-0.000853627
CELSR1	down	0.528166	0.495176	-0.0329898	0.839743	0.791973	-0.0477704				0.789139	0.748583	-0.040556	0.0475508	0.046498	-0.00105283	0.109802	0.110912	0.00111035
CENPI		0.619213	0.559933	-0.0592805				0.886866	0.859715	-0.0271506	0.762124	0.759331	-0.002793	0.0468497	0.0557023	0.00885261
CENPK								0.248382	0.240012	-0.00837072	0.853709	0.794083	-0.0596268	0.0639318	0.0639717	3.99756e-05	0.0127988	0.0175584	0.0047596
CENPN								0.203322	0.195422	-0.00789959				0.162634	0.156106	-0.0065287	0.0608152	0.0627593	0.00194415
CEP70								0.428324	0.40802	-0.0203045	0.85864	0.799917	-0.0587227	0.0694953	0.0703168	0.000821496	0.0318553	0.0345765	0.00272112
CES1	up	0.673165	0.648909	-0.024256							0.804782	0.77327	-0.0315117	0.793124	0.738917	-0.0542074
CFL2	up	0.0559297	0.0429531	-0.0129766				0.100412	0.104163	0.00375063	0.159987	0.147786	-0.0122005	0.514726	0.473836	-0.0408901	0.0191836	0.0162191	-0.00296453
CHAC1	up	0.0545185	0.0543206	-0.000197917	0.835813	0.827647	-0.00816608				0.890443	0.889838	-0.000604867	0.339568	0.337305	-0.00226353	0.0474691	0.050833	0.00336388
CHAF1A		0.0457827	0.0517697	0.00598695	0.809485	0.808225	-0.00125973				0.23203	0.226641	-0.0053889	0.056659	0.0572077	0.000548707	0.0659074	0.0568754	-0.00903202
CHML	up	0.924099	0.856887	-0.0672113	0.898413	0.843447	-0.0549664							0.900969	0.855724	-0.0452446
CHRNA5		0.044903	0.0536447	0.00874168							0.241726	0.22637	-0.0153559	0.591166	0.566913	-0.0242528	0.0210943	0.0199782	-0.00111612
CHRNA9					0.763385	0.722885	-0.0404996				0.901455	0.860006	-0.0414494	0.397936	0.399421	0.00148435	0.849464	0.846485	-0.00297893
CIRBP		0.0577444	0.05266	-0.00508436							0.274334	0.267817	-0.00651756	0.538816	0.531942	-0.00687408	0.0265501	0.0267037	0.000153634
CITED2	up	0.0517636	0.053871	0.00210741	0.0507528	0.0581067	0.00735395	0.0464132	0.0436101	-0.00280305	0.0694692	0.0708718	0.00140258	0.0477392	0.0486773	0.000938187	0.0523867	0.0521483	-0.000238402
CITED4	down	0.0165021	0.0276313	0.0111292	0.0656672	0.0640618	-0.00160543	0.108706	0.107089	-0.00161678				0.122792	0.128593	0.00580007	0.0428997	0.0431986	0.000298912
CKB	up										0.406165	0.389234	-0.0169313	0.340939	0.331055	-0.00988485	0.0926195	0.0910761	-0.00154337
CKMT1A	down				0.86496	0.836155	-0.0288052				0.784719	0.744058	-0.0406619				0.368226	0.372456	0.0042305
CLCA2	down				0.458932	0.460936	0.002004				0.501505	0.424259	-0.077246	0.877407	0.834766	-0.042641
CLDN1	up	0.0654616	0.0749918	0.00953016	0.635194	0.579753	-0.0554408	0.060719	0.0618736	0.00115455	0.308179	0.299624	-0.00855539	0.806604	0.737352	-0.0692513	0.0385359	0.0383656	-0.000170304
CLDN16											0.865566	0.810797	-0.0547689	0.900206	0.859823	-0.0403828	0.723455	0.701368	-0.0220869
CLDN6	up				0.556571	0.544053	-0.0125176	0.888522	0.864775	-0.0237466				0.849509	0.840807	-0.00870222	0.830512	0.820125	-0.0103873
CLDN8	down	0.0509324	0.0522389	0.0013065										0.0413302	0.0358679	-0.00546233	0.0393613	0.0372783	-0.00208303
CLEC7A	down	0.087973	0.0918779	0.00390489	0.891497	0.851876	-0.0396212				0.829053	0.732735	-0.0963173	0.888354	0.791179	-0.0971752	0.21153	0.190721	-0.0208095
CLGN		0.055307	0.0587186	0.00341159				0.0633548	0.069025	0.00567021	0.539303	0.541723	0.00242017	0.0796275	0.0746357	-0.00499186	0.0314183	0.0344807	0.00306243
CLIP4	up	0.733824	0.732291	-0.0015325				0.625525	0.589045	-0.0364798	0.690418	0.613848	-0.0765696	0.91401	0.887389	-0.0266212	0.97974	0.91432	-0.0654204
CLMN	down				0.774828	0.74535	-0.029478				0.522678	0.501108	-0.0215695	0.503073	0.478514	-0.024559
CLSPN	up							0.0368764	0.033635	-0.00324143	0.323436	0.305519	-0.0179176	0.0526752	0.0556999	0.00302468	0.0473368	0.0517924	0.00445559
CLU		0.308689	0.289569	-0.0191201	0.0492795	0.0538711	0.00459161				0.867061	0.83105	-0.0360107	0.781374	0.760955	-0.0204187	0.135613	0.136159	0.000545723
CLYBL	down				0.865205	0.815054	-0.0501517				0.658947	0.632013	-0.0269345	0.0712728	0.0684035	-0.00286922	0.0454105	0.0453151	-9.54383e-05
CMTM3	up				0.787789	0.784192	-0.0035965	0.269444	0.245644	-0.0237993	0.375972	0.354493	-0.0214784	0.921246	0.899424	-0.0218215
CMYA5	down				0.875283	0.840797	-0.0344857				0.443766	0.429317	-0.0144488	0.0519387	0.0533643	0.00142561	0.0240231	0.0258408	0.00181776
CNDP2	down	0.0435157	0.0667044	0.0231887	0.836724	0.799961	-0.0367627	0.066889	0.0666021	-0.000286962	0.0967909	0.100859	0.00406838	0.187713	0.1814	-0.00631314	0.0371765	0.0377958	0.000619341
CNKSR2		0.0559193	0.0598374	0.00391809	0.885175	0.887104	0.001929				0.431169	0.395157	-0.0360118	0.0657218	0.063505	-0.00221686
CNN1	up	0.665151	0.647907	-0.0172436	0.860026	0.817912	-0.042114				0.913489	0.889427	-0.0240623	0.783488	0.767855	-0.0156326	0.56831	0.555448	-0.0128619
CNN3					0.869691	0.782174	-0.0875169	0.0257507	0.0250124	-0.000738298	0.492371	0.472401	-0.0199703	0.65234	0.652894	0.000553822	0.0991813	0.0978774	-0.00130396
CNP					0.783637	0.762281	-0.0213562				0.594143	0.574626	-0.019517	0.0626046	0.0601325	-0.00247215	0.0431389	0.0430026	-0.000136275
CNR1					0.642254	0.618159	-0.0240957	0.258262	0.248619	-0.00964275	0.3581	0.349126	-0.00897395	0.836894	0.792502	-0.0443923	0.53727	0.53505	-0.00221992
CNTD2	up	0.934183	0.814514	-0.119669	0.941969	0.911343	-0.0306258				0.66899	0.635074	-0.033916	0.478522	0.469139	-0.00938332	0.797864	0.752693	-0.0451713
CNTN3											0.0603736	0.0663836	0.00600998	0.408151	0.45642	0.048269
COL12A1	up				0.750297	0.721493	-0.0288043	0.27271	0.253588	-0.0191219	0.781462	0.73538	-0.0460813	0.606169	0.542499	-0.0636696	0.059952	0.062108	0.00215608
COL14A1					0.757164	0.73842	-0.0187444	0.870884	0.8427	-0.0281837	0.718736	0.678989	-0.0397461	0.478108	0.457799	-0.0203084	0.979995	0.91574	-0.0642554
COL5A2	up	0.858717	0.82193	-0.0367865	0.818675	0.750408	-0.0682675				0.698582	0.671102	-0.027481	0.820972	0.771446	-0.0495263	0.87932	0.834574	-0.0447465
COQ10A	up	0.0849119	0.081087	-0.00382492	0.899824	0.869771	-0.0300535				0.408523	0.382642	-0.0258808	0.28371	0.280184	-0.0035257	0.0203577	0.0229053	0.00254753
COX19					0.854496	0.824317	-0.0301785	0.0100389	0.00915621	-0.000882713	0.485421	0.471702	-0.0137189	0.456745	0.467065	0.0103205	0.0816676	0.0816056	-6.1982e-05
COX6B1		0.0553924	0.0569878	0.00159537				0.0465144	0.0527667	0.00625235	0.867213	0.887543	0.0203304	0.445976	0.426453	-0.0195233	0.0474478	0.0468307	-0.000617087
COX7A1								0.909629	0.870759	-0.0388698	0.891824	0.89061	-0.00121358	0.934947	0.906147	-0.0288001	0.91788	0.867094	-0.0507856
COX7B2		0.856246	0.759912	-0.0963334				0.285032	0.284581	-0.000451173				0.0868826	0.0889896	0.00210695	0.387001	0.390977	0.00397553
CPA4	up	0.0544509	0.0661358	0.0116848	0.543994	0.508551	-0.0354425				0.597966	0.581926	-0.01604	0.90937	0.879805	-0.0295648
CPAMD8	down				0.862313	0.813165	-0.0491488				0.647967	0.633234	-0.0147333	0.858707	0.864944	0.00623694	0.0357667	0.0358835	0.000116829
CPM	up				0.563084	0.548799	-0.0142848	0.49999	0.472621	-0.0273692	0.34325	0.349633	0.00638296	0.715313	0.679698	-0.0356144
CPT1A					0.92568	0.859288	-0.0663921	0.364237	0.357351	-0.00688588	0.839083	0.793795	-0.0452882	0.759083	0.738438	-0.0206449	0.0947998	0.0844803	-0.0103196
CRAT	down	0.114048	0.114242	0.000194063	0.841489	0.807632	-0.0338569				0.332473	0.32232	-0.0101531
CREB3L2	down	0.0372365	0.0304354	-0.00680106	0.893275	0.859496	-0.0337791				0.734168	0.686775	-0.0473937	0.0725789	0.0750888	0.00250994	0.076501	0.0763875	-0.000113559
CREB5		0.135092	0.123651	-0.0114411	0.072904	0.0835968	0.0106929	0.25234	0.247415	-0.00492526	0.111182	0.114533	0.00335113	0.254651	0.240991	-0.0136597	0.0864912	0.0836009	-0.00289032
CRISP2	down							0.853621	0.785937	-0.0676844	0.835374	0.794325	-0.0410497	0.676609	0.664801	-0.0118082	0.934473	0.855013	-0.0794602
CRISP3	down							0.781009	0.687591	-0.0934179	0.790501	0.753092	-0.0374097
CRISPLD1		0.466041	0.451887	-0.0141537	0.0575581	0.100707	0.0431492	0.0570972	0.0592711	0.00217388	0.059419	0.0582094	-0.00120953	0.0447762	0.0514089	0.00663268	0.424069	0.408145	-0.0159249
CRISPLD2		0.0541522	0.0528781	-0.0012741	0.728645	0.726233	-0.00241266	0.597628	0.587716	-0.00991196	0.568247	0.545165	-0.0230823	0.0577296	0.0604172	0.00268767	0.0571124	0.0699929	0.0128805
CRY1	up	0.0223605	0.0205144	-0.00184614							0.493333	0.463563	-0.0297693	0.474386	0.432897	-0.0414886	0.0299598	0.0281962	-0.00176359
CRYGC	up	0.876783	0.862033	-0.0147498							0.900881	0.851638	-0.0492433	0.762238	0.678894	-0.0833437	0.698493	0.667967	-0.0305252
CSGALNACT2	up	0.0187505	0.0193752	0.000624684	0.862543	0.826146	-0.0363967	0.238773	0.233445	-0.00532744	0.847109	0.811661	-0.0354477	0.581874	0.552233	-0.0296409	0.0433253	0.0418185	-0.00150686
CST4		0.0773453	0.0853478	0.00800252	0.0896744	0.0900482	0.000373747				0.0990311	0.101549	0.00251819	0.131537	0.126592	-0.00494575
CST6	up	0.585084	0.570164	-0.0149194	0.425393	0.437344	0.0119505				0.666207	0.652506	-0.0137011	0.380843	0.36724	-0.0136027	0.132729	0.114426	-0.0183033
CSTA		0.750623	0.686927	-0.0636965							0.888452	0.867112	-0.0213408				0.250149	0.269421	0.0192712
CTAGE1	up	0.78924	0.73054	-0.0586996	0.778826	0.765994	-0.0128312							0.745009	0.706399	-0.0386094	0.928719	0.896141	-0.0325776
CTBS		0.10933	0.108077	-0.00125347							0.309892	0.289117	-0.0207758	0.420891	0.400412	-0.0204791	0.0700671	0.0713187	0.00125167
CTCFL					0.822168	0.782766	-0.0394013	0.777767	0.733048	-0.0447189	0.485823	0.44507	-0.0407524
CTGF	up	0.0475457	0.0568617	0.00931602	0.560298	0.575442	0.0151443				0.429581	0.419771	-0.00981018	0.217054	0.202087	-0.0149668	0.042214	0.0432092	0.000995234
CTH	up	0.0757368	0.0698643	-0.00587251							0.453915	0.446735	-0.0071798	0.0573692	0.0556478	-0.00172142	0.0387946	0.0374565	-0.00133813
CTNNAL1	up										0.313818	0.299084	-0.0147337	0.763477	0.756541	-0.00693648	0.0395197	0.0427852	0.00326548
CTSE	up				0.779292	0.710153	-0.0691388				0.667831	0.674919	0.00708773	0.780556	0.782227	0.00167117	0.338779	0.325464	-0.0133147
CTSW		0.856138	0.854513	-0.0016255							0.780466	0.762877	-0.0175891	0.823436	0.783686	-0.0397502	0.777823	0.76522	-0.012603
CUBN		0.726179	0.72429	-0.0018886	0.828698	0.781882	-0.0468158				0.571897	0.56167	-0.0102269	0.573003	0.560448	-0.012555	0.904805	0.9022	-0.00260507
CUL4B	up	0.775612	0.766445	-0.00916713	0.886819	0.811821	-0.0749976				0.0452748	0.0419993	-0.00327557	0.868818	0.804469	-0.0643488	0.595476	0.608012	0.0125359
CXADRP3	up										0.592185	0.592408	0.000222507	0.880581	0.75349	-0.127092
CXCL10	down				0.77376	0.796708	0.0229478							0.837164	0.77034	-0.0668243	0.686463	0.659247	-0.0272166
CXCL2		0.862647	0.837155	-0.0254925	0.736231	0.706444	-0.0297864				0.813243	0.796429	-0.016814	0.890113	0.830327	-0.0597867	0.883743	0.85749	-0.0262531
CXCL5		0.873616	0.84027	-0.0333462	0.798143	0.747889	-0.0502542							0.852908	0.828481	-0.024427	0.847022	0.826759	-0.0202632
CYB5D1		0.0374244	0.0374804	5.60088e-05	0.687457	0.646887	-0.0405702				0.646849	0.62604	-0.0208084	0.0928593	0.0852347	-0.0076246	0.013439	0.016126	0.00268699
CYGB	up	0.665019	0.675119	0.0100997	0.679138	0.682678	0.00353971				0.814625	0.774399	-0.040226	0.843072	0.822941	-0.0201302	0.926094	0.895762	-0.0303313
CYLD	up	0.0293938	0.0291646	-0.00022918	0.709316	0.763446	0.0541301	0.267325	0.252374	-0.014951	0.86806	0.773858	-0.0942023	0.0536785	0.0579352	0.00425669	0.065918	0.0695319	0.00361396
CYP1A1	up				0.905969	0.894178	-0.0117916	0.527705	0.520677	-0.00702767	0.88759	0.842956	-0.044634	0.381123	0.374153	-0.00697085	0.0800412	0.0768887	-0.00315248
CYP1B1		0.0807717	0.0756442	-0.00512745	0.627104	0.590722	-0.0363829	0.0168292	0.0149335	-0.00189574	0.136919	0.131407	-0.00551188	0.173175	0.170989	-0.00218544	0.0492755	0.0513236	0.00204818
CYP24A1		0.535598	0.519122	-0.0164768	0.735833	0.721951	-0.0138814	0.591749	0.589703	-0.00204572	0.54986	0.534258	-0.0156022	0.305863	0.297719	-0.0081436	0.0506295	0.060332	0.00970254
CYP27A1	down				0.899354	0.907656	0.0083017	0.0455439	0.0496202	0.00407635	0.370399	0.353684	-0.0167154	0.535007	0.518013	-0.0169936	0.0940987	0.0957232	0.00162455
CYP2R1		0.35957	0.342577	-0.0169923							0.310088	0.301385	-0.00870338	0.690068	0.689391	-0.000676744	0.431776	0.433965	0.00218927
CYP4B1	down	0.568295	0.577582	0.00928633	0.845144	0.810401	-0.0347436				0.829619	0.804998	-0.0246215	0.877516	0.85025	-0.0272659	0.316961	0.353419	0.0364575
CYP4X1	down	0.0645557	0.0641154	-0.000440285							0.500291	0.466636	-0.0336552	0.760067	0.732811	-0.0272566	0.0471273	0.0514686	0.00434131
CYP4Z1	down										0.844341	0.795904	-0.0484374
CYP4Z2P	down										0.589563	0.556362	-0.0332005	0.329761	0.300869	-0.0288915
CYR61	up	0.00309572	0.00445886	0.00136314	0.228741	0.19665	-0.0320906				0.263567	0.25801	-0.00555642	0.583422	0.555209	-0.0282131	0.0750329	0.0781182	0.00308526
DAB2	up	0.0548295	0.0540462	-0.000783287	0.592057	0.5706	-0.0214574	0.575583	0.544569	-0.0310139	0.702318	0.705075	0.0027568	0.801476	0.716291	-0.0851852	0.135377	0.132472	-0.00290483
DAG1					0.887999	0.887866	-0.000133333	0.337877	0.300155	-0.037722	0.888779	0.872131	-0.0166482	0.060591	0.0596327	-0.000958293	0.0279401	0.0307759	0.00283575
DAPK1	up							0.555346	0.543293	-0.0120538	0.811136	0.768295	-0.0428409	0.37358	0.347526	-0.0260542	0.00745504	0.00978859	0.00233355
DAPP1	up	0.0610035	0.0634811	0.00247768	0.331613	0.31204	-0.0195732				0.879786	0.84076	-0.0390259	0.213788	0.207379	-0.00640889	0.0587133	0.0600031	0.00128987
DAZL		0.925776	0.904849	-0.0209275							0.550309	0.534328	-0.0159815	0.398666	0.394564	-0.00410217	0.940061	0.880672	-0.0593896
DCAF4L1	up	0.726772	0.712626	-0.0141455				0.954756	0.928261	-0.0264955				0.858729	0.852878	-0.00585093	0.82718	0.822585	-0.00459553
DCAF4L2		0.836981	0.822386	-0.0145946	0.682245	0.666781	-0.015464	0.962342	0.910605	-0.0517368							0.917119	0.860211	-0.0569075
DCAKD	down	0.0563143	0.0522092	-0.0041051	0.856553	0.854715	-0.00183773	0.488786	0.476201	-0.0125845	0.878337	0.867088	-0.0112491	0.246612	0.232828	-0.0137847	0.0578345	0.0641576	0.00632302
DCLK1		0.203223	0.20094	-0.00228337				0.294469	0.301043	0.00657345	0.665051	0.640388	-0.0246625	0.618935	0.612438	-0.00649632	0.191284	0.199432	0.00814804
DCLK2	up	0.0344382	0.0325149	-0.00192326	0.809366	0.791109	-0.0182567				0.698315	0.671943	-0.0263725	0.342811	0.336839	-0.00597257	0.0131357	0.0157268	0.00259106
DDAH1		0.337452	0.321573	-0.0158788	0.772664	0.775773	0.00310867	0.426962	0.410638	-0.0163239	0.604983	0.568118	-0.0368654	0.0594008	0.059989	0.000588135	0.502223	0.460084	-0.0421388
DDIT3	up	0.0966004	0.0977579	0.00115758	0.858622	0.807211	-0.0514108	0.0878842	0.0864394	-0.00144475				0.113702	0.119939	0.00623702	0.0463424	0.0457589	-0.00058351
DDIT4	down	0.0899942	0.0892587	-0.000735493	0.0677551	0.0580747	-0.00968035	0.0684925	0.0637582	-0.00473435	0.0886272	0.0887047	7.75267e-05	0.0806775	0.0832033	0.00252586	0.0615923	0.0607523	-0.000840071
DDX23								0.239429	0.232236	-0.00719367	0.839591	0.801335	-0.0382559	0.0806336	0.0818637	0.00123014	0.0700216	0.0721548	0.00213325
DDX4	up							0.987224	0.936785	-0.0504384	0.744919	0.732878	-0.0120406	0.776451	0.738531	-0.0379206	0.885093	0.855517	-0.0295754
DDX43	up	0.907505	0.881663	-0.0258418	0.851914	0.808406	-0.0435077							0.834955	0.805728	-0.0292269	0.81944	0.818019	-0.00142147
DDX47	up	0.00783161	0.00232156	-0.00551004	0.784457	0.760793	-0.0236642				0.491552	0.470786	-0.0207664	0.129526	0.143516	0.0139902	0.0376489	0.0356393	-0.00200964
DDX50		0.0683413	0.064186	-0.00415526							0.452343	0.422565	-0.029778	0.245652	0.230844	-0.0148075	0.0535334	0.0565719	0.00303851
DDX53		0.91716	0.850749	-0.0664111										0.826883	0.809167	-0.0177155	0.898312	0.850383	-0.0479289
DDX60L	up							0.415757	0.392737	-0.02302	0.7881	0.734788	-0.0533121	0.328533	0.290719	-0.0378139	0.053294	0.0503213	-0.00297268
DENND2C	up	0.0708923	0.0696909	-0.00120141				0.490335	0.443725	-0.04661	0.923645	0.890337	-0.0333084	0.306892	0.306784	-0.000108316	0.0414255	0.0454958	0.00407028
DEPDC7	up	0.048833	0.0455191	-0.00331391				0.0680499	0.0688937	0.000843772	0.732306	0.70388	-0.0284261	0.68423	0.61796	-0.0662699	0.0218715	0.0178125	-0.004059
DFNA5		0.59019	0.569112	-0.0210784	0.664242	0.631205	-0.033037	0.546227	0.529242	-0.0169842	0.563957	0.538794	-0.025163	0.864584	0.833947	-0.0306368
DGKE	up	0.155273	0.152085	-0.00318822	0.793542	0.824174	0.0306319	0.0530868	0.05556	0.00247325	0.427577	0.405123	-0.0224539	0.271557	0.248757	-0.0228008
DHCR24	down	0.0369866	0.0410708	0.00408415	0.8824	0.840866	-0.0415342				0.531441	0.512212	-0.0192295	0.0784119	0.0781369	-0.000275025	0.0429602	0.0437047	0.000744523
DIAPH2	down	0.0778771	0.0794597	0.00158258	0.545636	0.538713	-0.00692287	0.059224	0.0543884	-0.00483562	0.430676	0.419477	-0.0111991	0.421399	0.410528	-0.0108713	0.173711	0.150955	-0.0227563
DIO2		0.77763	0.740951	-0.0366785	0.685188	0.640591	-0.0445972				0.9251	0.864202	-0.060898	0.736682	0.705749	-0.0309322
DIRAS3	down	0.380159	0.395905	0.0157457	0.850624	0.782568	-0.0680561	0.459198	0.451879	-0.00731892	0.77659	0.735975	-0.0406142	0.831547	0.794566	-0.0369815	0.325552	0.336843	0.0112914
DIS3L		0.088794	0.0898117	0.00101767	0.90134	0.840877	-0.0604629				0.628329	0.579698	-0.0486306	0.80168	0.754414	-0.047266	0.0697857	0.058165	-0.0116207
DKK1	up	0.0801172	0.07174	-0.00837714				0.0837836	0.0878514	0.00406774	0.348618	0.33215	-0.0164681	0.772715	0.727385	-0.0453298	0.0965207	0.0918071	-0.00471364
DLGAP5								0.070827	0.0700264	-0.0008006	0.868117	0.828367	-0.0397494	0.401496	0.39375	-0.00774513	0.0415104	0.0528203	0.0113099
DMC1		0.0104651	0.0107106	0.000245539				0.866624	0.819318	-0.0473055	0.605811	0.594847	-0.0109649	0.0531688	0.0575541	0.00438529
DMXL2								0.0720095	0.0694238	-0.00258567	0.484303	0.454157	-0.0301456	0.0431799	0.0392512	-0.00392871	0.0674543	0.0629459	-0.00450843
DNA2		0.0876504	0.0867208	-0.000929565							0.608053	0.562	-0.0460529	0.859391	0.808291	-0.0511004	0.546516	0.533958	-0.0125583
DNAH11		0.0615078	0.0525179	-0.00898987							0.577692	0.548251	-0.0294414	0.253418	0.241051	-0.0123664	0.0250748	0.0258222	0.000747433
DNAJA1								0.0115292	0.0111727	-0.000356475	0.0501146	0.0514128	0.00129816	0.0564065	0.0485196	-0.00788695	0.091742	0.0942633	0.00252135
DNAJA4	up							0.829554	0.80575	-0.0238036	0.177453	0.167445	-0.0100077	0.529556	0.519091	-0.0104649	0.213065	0.227657	0.0145925
DNAJB1		0.0836548	0.0783491	-0.00530573	0.598699	0.553897	-0.0448027	0.216152	0.23261	0.0164577	0.172066	0.183124	0.0110584	0.440886	0.432895	-0.00799134	0.0250007	0.0265992	0.00159855
DNAJB4	up	0.0454551	0.0424632	-0.00299193							0.83437	0.787961	-0.0464092				0.0497289	0.0547048	0.0049759
DNAJC13		0.0651237	0.071158	0.00603429	0.89119	0.813025	-0.0781651	0.347414	0.335607	-0.0118066	0.890105	0.838618	-0.0514878	0.190656	0.179676	-0.0109807	0.0416916	0.043393	0.00170143
DNMT3B		0.00917305	0.00856568	-0.000607378	0.904383	0.848545	-0.0558378	0.52149	0.493355	-0.0281354	0.922792	0.895929	-0.0268629	0.333087	0.319304	-0.013783	0.0216221	0.0209099	-0.00071221
DOCK1	down										0.747347	0.715771	-0.031576	0.280788	0.274184	-0.00660489	0.0421397	0.0407654	-0.00137433
DOCK11								0.0162048	0.0194363	0.00323149	0.533297	0.525002	-0.00829555	0.764896	0.739615	-0.0252804
DONSON								0.00676202	0.00980038	0.00303836	0.336743	0.318156	-0.0185877	0.229631	0.218943	-0.0106878	0.0329844	0.0343776	0.00139326
DPCR1	up				0.708935	0.689056	-0.019879				0.50353	0.495204	-0.00832594	0.678405	0.651845	-0.0265599	0.680562	0.678932	-0.00163023
DPP4		0.140894	0.139162	-0.00173184	0.342969	0.310073	-0.0328964				0.478258	0.457529	-0.0207295	0.794354	0.778182	-0.0161721	0.347755	0.352539	0.00478397
DRG1		0.385739	0.38432	-0.00141873							0.558634	0.536423	-0.0222109	0.326006	0.32006	-0.00594568	0.0329175	0.030427	-0.00249057
DSCC1		0.057066	0.0536656	-0.00340043							0.397141	0.364902	-0.0322396	0.463407	0.427721	-0.0356856	0.00980542	0.00856663	-0.00123879
DSG3		0.620471	0.605919	-0.0145514										0.886526	0.826764	-0.0597617	0.782721	0.743956	-0.038765
DSP		0.0173493	0.0202352	0.00288592	0.862291	0.79125	-0.0710407				0.525696	0.51095	-0.0147459	0.570813	0.534705	-0.0361083	0.102973	0.10176	-0.00121304
DUSP1	up	0.0809219	0.0786934	-0.00222859	0.864925	0.83696	-0.0279649	0.0118075	0.0109118	-0.000895683	0.420183	0.396669	-0.0235142	0.0947514	0.0914216	-0.00332983	0.0184377	0.0146035	-0.00383421
DUSP14	up				0.838476	0.795128	-0.0433478	0.562767	0.530239	-0.0325278	0.915313	0.865774	-0.0495391	0.0660546	0.0679785	0.00192391	0.0504307	0.0481082	-0.00232246
DUSP5	up	0.0223844	0.0233703	0.000985857	0.458432	0.463938	0.0055059	0.013452	0.0166602	0.00320812	0.184927	0.169981	-0.0149458	0.0664206	0.0726595	0.0062389	0.0453989	0.045998	0.000599114
DUSP6	up	0.00613489	0.00902345	0.00288856	0.859747	0.798543	-0.0612044	0.067768	0.0607334	-0.00703458	0.102611	0.0982886	-0.00432194	0.0669596	0.0692643	0.00230467	0.0515076	0.0458322	-0.00567539
DYM	down				0.870462	0.847598	-0.0228638	0.400101	0.356593	-0.0435085	0.880466	0.859886	-0.0205798	0.778658	0.741361	-0.0372974	0.0476779	0.052773	0.00509508
DYNC2H1	up	0.460213	0.444248	-0.0159655							0.0918556	0.0925141	0.000658448	0.0686411	0.0823791	0.013738	0.023553	0.0276384	0.00408532
E2F7					0.929289	0.871769	-0.0575199	0.0719612	0.0769493	0.00498808	0.812186	0.764277	-0.0479089	0.101422	0.102718	0.00129541	0.0594027	0.0539189	-0.00548374
E2F8		0.0678418	0.0696609	0.00181915				0.0563428	0.0539668	-0.00237604	0.868062	0.814898	-0.0531637	0.224718	0.217125	-0.00759271	0.049659	0.0526732	0.00301412
ECSCR		0.744628	0.721672	-0.0229555							0.902739	0.884951	-0.0177888	0.872319	0.839188	-0.0331311	0.737108	0.723771	-0.0133368
EFEMP2		0.769825	0.756264	-0.0135612	0.865058	0.80782	-0.0572387	0.889106	0.856325	-0.0327808	0.675832	0.665284	-0.0105482	0.319099	0.30936	-0.00973881	0.516197	0.508303	-0.00789406
EFNB2	up	0.0662206	0.0737184	0.00749785	0.910366	0.867166	-0.0432004				0.595324	0.55699	-0.0383336	0.0609114	0.061706	0.000794598	0.0690237	0.0639617	-0.00506195
EGFR					0.786513	0.769873	-0.0166402	0.0365273	0.030378	-0.00614935	0.704924	0.638122	-0.0668021	0.529683	0.474274	-0.0554087
EGR1	down				0.843643	0.80531	-0.0383333	0.0509188	0.0415278	-0.00939106	0.914126	0.894091	-0.0200351	0.0863697	0.0785313	-0.00783832	0.0418073	0.0434336	0.00162623
EHF	down				0.893632	0.882561	-0.0110711	0.0690448	0.0727025	0.00365772	0.388123	0.380411	-0.00771145	0.193537	0.183413	-0.0101236
EHMT1	down				0.914553	0.825837	-0.0887161				0.866306	0.812564	-0.0537417
EIF4A3		0.101677	0.106142	0.00446488				0.018403	0.0207428	0.00233984	0.826962	0.795888	-0.031074	0.183948	0.171309	-0.012639	0.0427813	0.0548722	0.0120909
EIF4EBP1		0.0155296	0.00867128	-0.00685834							0.350683	0.336718	-0.0139647	0.234718	0.234439	-0.000279005	0.0333633	0.0300279	-0.00333538
EIF4EBP2					0.909007	0.852605	-0.0564026	0.0370038	0.0372338	0.000230039	0.370597	0.35876	-0.0118372	0.366093	0.35061	-0.0154826	0.0365295	0.0344026	-0.00212693
EIF5A2	up	0.0713965	0.0704269	-0.000969633	0.816311	0.784726	-0.0315849	0.123148	0.0960673	-0.027081	0.774451	0.723173	-0.0512783	0.568245	0.547207	-0.0210385	0.052124	0.0489885	-0.00313547
ELAVL2	up							0.561515	0.536247	-0.0252683	0.644094	0.598634	-0.0454598	0.620307	0.601883	-0.0184234	0.482431	0.521732	0.0393004
ELF5	down	0.0728683	0.0693062	-0.00356211				0.353359	0.339683	-0.0136763	0.718645	0.703313	-0.0153326	0.361596	0.335806	-0.0257906	0.0770632	0.0768554	-0.000207797
ELL2	up	0.178012	0.171956	-0.00605618							0.574138	0.541239	-0.0328992	0.413088	0.384515	-0.0285728	0.188986	0.184035	-0.00495121
ELL3		0.0562504	0.0532206	-0.0030298				0.0557808	0.0477086	-0.00807219	0.526304	0.520153	-0.00615064	0.0747161	0.0781468	0.00343069	0.0493068	0.046575	-0.0027318
ELOVL2	up				0.642622	0.592599	-0.0500233	0.0197402	0.0173095	-0.0024307	0.768597	0.712993	-0.0556038	0.228722	0.22039	-0.00833227
ELOVL4	up	0.034651	0.0360422	0.00139122				0.0522488	0.0463082	-0.00594065	0.451354	0.423314	-0.0280401	0.299064	0.278638	-0.0204264	0.0278668	0.0301781	0.00231131
ELOVL7	up				0.883478	0.809362	-0.0741158	0.238557	0.218354	-0.0202034	0.714413	0.66535	-0.0490627	0.902982	0.858927	-0.0440552
ELP4	down	0.0369764	0.0358602	-0.00111617							0.541692	0.518611	-0.0230804				0.0255079	0.0251754	-0.000332516
ELTD1								0.891747	0.873045	-0.0187012	0.720428	0.701861	-0.0185666	0.686975	0.653949	-0.033026	0.516202	0.500727	-0.0154755
EMP3	up	0.782392	0.738154	-0.0442389	0.0164502	0.0123206	-0.00412958	0.45256	0.437438	-0.0151216	0.242206	0.237147	-0.00505842	0.533187	0.51817	-0.0150172
EMX2		0.492159	0.467884	-0.0242755	0.477717	0.457578	-0.0201389				0.52206	0.512477	-0.00958321	0.552713	0.51497	-0.0377424	0.788536	0.771938	-0.0165973
ENDOD1		0.0248681	0.0244871	-0.000380986	0.882428	0.852748	-0.02968				0.334629	0.317418	-0.0172105	0.740316	0.727617	-0.0126994	0.00919796	0.0113928	0.00219487
ENG		0.0459088	0.0417844	-0.00412441				0.0755727	0.0715461	-0.00402656	0.677096	0.661128	-0.0159685	0.848762	0.803217	-0.0455457
ENKUR					0.883375	0.843944	-0.0394309	0.0884145	0.0870233	-0.00139127	0.555934	0.556702	0.000768	0.0495196	0.0492143	-0.000305338
ENO2		0.249913	0.263722	0.0138092	0.698232	0.680918	-0.0173137	0.105302	0.107074	0.00177189							0.072219	0.0696069	-0.00261211
ENPP2		0.907448	0.883349	-0.0240988							0.711223	0.689042	-0.0221804	0.770897	0.717406	-0.0534907	0.625338	0.60892	-0.0164179
ENTPD5	down				0.7484	0.683657	-0.0647433	0.25319	0.233788	-0.0194021	0.799994	0.741625	-0.0583694
EPGN	up	0.087188	0.103281	0.0160932													0.0820162	0.0714633	-0.0105529
EPHA2	up	0.053265	0.0616462	0.00838115	0.968546	0.969041	0.0004949				0.543742	0.526273	-0.0174691	0.338593	0.33355	-0.00504329	0.0854204	0.0835635	-0.00185689
EPHA3					0.568471	0.581919	0.013448	0.0472793	0.0405445	-0.00673474	0.459084	0.462831	0.00374757	0.50751	0.490406	-0.0171041	0.0422103	0.049313	0.0071027
EREG	up	0.0517277	0.0452144	-0.00651324	0.875016	0.851959	-0.0230579				0.0884095	0.0805874	-0.00782201	0.803503	0.755393	-0.0481104	0.0969108	0.0855161	-0.0113947
ERG					0.0563619	0.072141	0.0157791	0.417664	0.413021	-0.00464245	0.17077	0.167012	-0.00375718	0.0301848	0.0311932	0.00100842	0.0684777	0.0717972	0.00331949
ERN1	up	0.0713694	0.0891009	0.0177315	0.899123	0.846686	-0.0524371				0.640899	0.605777	-0.0351224	0.659639	0.624071	-0.0355678	0.0136546	0.0136316	-2.29697e-05
ERO1LB	up	0.0381481	0.0385727	0.000424623							0.44552	0.424445	-0.0210756	0.161929	0.158741	-0.00318797	0.008392	0.00899529	0.000603291
ERP27	up				0.672119	0.581132	-0.0909876				0.413871	0.402825	-0.0110466	0.9104	0.857247	-0.0531534	0.81314	0.75801	-0.0551294
ESCO2		0.00205183	6.1068e-05	-0.00199076	0.806845	0.685721	-0.121124	0.0820688	0.0803869	-0.00168187	0.776452	0.726012	-0.0504396	0.613848	0.573981	-0.0398665	0.0405401	0.0390405	-0.00149955
ESRP2		0.0357751	0.0348904	-0.000884717	0.6875	0.660199	-0.0273012				0.187232	0.172519	-0.0147132	0.211333	0.216585	0.00525213	0.0497976	0.0492495	-0.000548084
ETS1	up	0.168345	0.184749	0.0164041	0.881545	0.824787	-0.0567579	0.784407	0.747526	-0.0368813	0.497745	0.474772	-0.0229721	0.703553	0.661103	-0.0424497
ETV4	up	0.0492803	0.0555524	0.00627213	0.880265	0.861905	-0.0183602	0.0384804	0.0411454	0.00266498	0.265718	0.257533	-0.00818501	0.0732862	0.0707176	-0.00256864
ETV5					0.933048	0.904114	-0.0289335	0.0495484	0.0523965	0.00284807	0.528411	0.517422	-0.0109894	0.0827882	0.07958	-0.00320824	0.0491079	0.0544042	0.00529631
ETV6	down				0.896642	0.831804	-0.0648374	0.0374401	0.0375954	0.000155387	0.676638	0.641412	-0.0352254	0.0494781	0.050182	0.000703916	0.035211	0.0467906	0.0115797
EXOC2	down				0.840408	0.80557	-0.034838	0.793979	0.731366	-0.0626126	0.909484	0.841992	-0.0674917	0.304564	0.293258	-0.0113058	0.0405667	0.0393979	-0.0011688
EXOC4	down	0.0668196	0.0676623	0.00084273	0.884669	0.859954	-0.0247152				0.782006	0.746371	-0.0356349	0.690499	0.630411	-0.0600888	0.0344841	0.0312313	-0.00325272
EYA1					0.0568513	0.056071	-0.000780307	0.292902	0.283528	-0.00937336	0.0555283	0.0185115	-0.0370168	0.0586682	0.0710392	0.012371	0.267988	0.261425	-0.00656285
EYA2	down				0.876068	0.809212	-0.0668564	0.289105	0.274478	-0.0146272	0.884732	0.869992	-0.0147399	0.713013	0.66336	-0.0496538	0.0541323	0.0538606	-0.000271665
F13A1		0.0625045	0.062977	0.000472438	0.0625532	0.0622798	-0.000273403	0.0629025	0.0581225	-0.00477994	0.22732	0.230616	0.00329596	0.105056	0.0990981	-0.00595756	0.0944702	0.102232	0.00776135
F3	up	0.0565797	0.0547578	-0.00182185	0.918302	0.876918	-0.0413835				0.251658	0.244771	-0.00688648	0.101105	0.0994004	-0.00170423	0.0580564	0.0612254	0.00316894
FABP3	up	0.392689	0.358667	-0.0340229	0.848696	0.800477	-0.0482191							0.499324	0.475435	-0.0238895	0.119404	0.100821	-0.0185834
FADS3	up	0.00282548	0.00285665	3.117e-05	0.712517	0.68383	-0.0286868				0.437663	0.427925	-0.00973881	0.423635	0.424906	0.00127047	0.0771191	0.0777947	0.000675523
FAM102B		0.057748	0.0622247	0.00447672	0.8914	0.857607	-0.0337929				0.554091	0.515588	-0.0385025	0.212679	0.204476	-0.00820248
FAM111B		0.090617	0.0942221	0.00360514				0.788852	0.699501	-0.0893516	0.874472	0.802285	-0.0721867	0.337276	0.314565	-0.0227108	0.207781	0.209116	0.0013352
FAM114A1	down							0.748663	0.729775	-0.0188882	0.87608	0.842808	-0.0332719	0.0614541	0.061844	0.000389907	0.042901	0.0443295	0.0014285
FAM122B								0.143381	0.136054	-0.00732686	0.760002	0.711812	-0.0481898	0.826886	0.818182	-0.00870328	0.0584033	0.0535246	-0.00487871
FAM127C	down	0.279502	0.268977	-0.010525				0.013339	0.0165469	0.0032079				0.735413	0.663547	-0.0718665	0.0670414	0.0672725	0.000231073
FAM129A		0.0378383	0.0390395	0.00120123	0.795018	0.749793	-0.0452248				0.651029	0.620689	-0.0303395	0.686981	0.65827	-0.0287107
FAM133A	up	0.0511199	0.0464465	-0.00467333				0.0576253	0.0270182	-0.0306072	0.120282	0.125631	0.0053497	0.180209	0.171103	-0.00910604	0.0155028	0.0428779	0.0273751
FAM167A					0.0600117	0.0612367	0.00122501	0.210734	0.213171	0.00243733	0.0313897	0.03926	0.00787032	0.394183	0.391042	-0.00314159	0.0515708	0.0437616	-0.00780921
FAM168A	down				0.877979	0.865663	-0.0123163	0.513459	0.485967	-0.0274925	0.778194	0.754536	-0.023658	0.0499277	0.0455952	-0.00433256	0.0312388	0.0322901	0.00105129
FAM169A	up							0.310532	0.302577	-0.00795491				0.799507	0.733471	-0.0660364	0.730819	0.70171	-0.0291094
FAM184A		0.878489	0.799754	-0.0787347				0.494602	0.467308	-0.027294	0.895129	0.844877	-0.0502518	0.760032	0.739055	-0.0209771	0.0860545	0.0882933	0.00223884
FAM196B					0.0727992	0.0709233	-0.00187588	0.144267	0.147071	0.00280379				0.183536	0.196759	0.0132228	0.208641	0.225819	0.017178
FAM198B	up							0.857876	0.789449	-0.0684262	0.879574	0.836133	-0.0434413	0.337591	0.331051	-0.00654009	0.359457	0.321737	-0.0377198
FAM46C	up	0.00710768	0.00719451	8.6826e-05	0.855607	0.830453	-0.0251536	0.313631	0.300583	-0.0130479	0.824243	0.798837	-0.0254063	0.256887	0.246811	-0.0100762	0.0500538	0.0477934	-0.00226036
FAM50B		0.0572555	0.0589752	0.00171968	0.648869	0.649372	0.000503167	0.375821	0.382647	0.00682647	0.806554	0.747219	-0.0593351	0.384728	0.38118	-0.0035471	0.0563589	0.0548081	-0.00155085
FAM65A	up				0.859925	0.804741	-0.0551837	0.253917	0.253786	-0.000131051	0.578692	0.551874	-0.0268183	0.614225	0.602365	-0.0118609	0.0502652	0.0525637	0.00229855
FAM65B	up	0.257572	0.247386	-0.0101857				0.652271	0.610005	-0.0422663	0.477326	0.45126	-0.0260663	0.170407	0.158988	-0.0114189	0.306824	0.278285	-0.0285383
FAM83B								0.461859	0.421448	-0.0404117	0.906981	0.84825	-0.058731	0.3613	0.332647	-0.0286528	0.0706005	0.0654735	-0.00512701
FAM83D		0.0719784	0.07652	0.00454156	0.894257	0.832337	-0.0619201				0.0593425	0.0602415	0.000899038	0.63658	0.593552	-0.0430278	0.0334739	0.0361032	0.00262933
FANCE		0.13979	0.139611	-0.000179833							0.636545	0.603691	-0.0328539	0.801481	0.767905	-0.0335763	0.0437298	0.0468867	0.00315696
FANCL		0.0129774	0.00689558	-0.00608186				0.0656056	0.0685613	0.00295564	0.317126	0.283914	-0.0332121				0.0434572	0.0459857	0.00252845
FANCM		0.068337	0.0684835	0.000146588							0.889086	0.809369	-0.0797172
FARP1	down				0.668275	0.615963	-0.0523115	0.635314	0.60204	-0.0332737	0.844998	0.799689	-0.0453089	0.549222	0.521632	-0.0275906
FARS2	down				0.768575	0.766019	-0.00255687	0.857944	0.835837	-0.0221071	0.781099	0.741898	-0.0392012
FASN	down	0.0219631	0.0190432	-0.00291983	0.821014	0.806221	-0.0147934	0.11673	0.12109	0.0043595	0.809224	0.780278	-0.028946	0.136988	0.140439	0.00345146	0.0547961	0.0621509	0.00735478
FBN2		0.61547	0.594552	-0.0209189	0.185287	0.200882	0.0155949				0.308158	0.298514	-0.00964432	0.819067	0.825443	0.00637583
FBXL13	up				0.598313	0.570481	-0.0278323	0.828789	0.785749	-0.0430399	0.829419	0.78112	-0.0482988
FBXL20	down	0.0249166	0.0260826	0.00116593	0.874266	0.847958	-0.0263078				0.462215	0.430964	-0.0312503	0.197592	0.19712	-0.000471786
FBXO30		0.0196405	0.00718723	-0.0124533				0.0803554	0.0816746	0.00131914	0.892057	0.832252	-0.059805	0.248658	0.242672	-0.00598577	0.0558638	0.0513603	-0.00450352
FCAR		0.0635458	0.0596619	-0.00388396	0.476634	0.460917	-0.0157173				0.174254	0.140302	-0.0339528	0.094964	0.105061	0.0100974
FCER1G		0.875784	0.849592	-0.026192	0.895793	0.815292	-0.0805004				0.811834	0.768941	-0.0428933	0.879219	0.820786	-0.0584329	0.874993	0.826392	-0.0486004
FDFT1		0.000967727	0.00497739	0.00400966	0.872171	0.82066	-0.0515116				0.186599	0.169343	-0.0172553	0.514409	0.507759	-0.00664995	0.294606	0.296959	0.00235322
FEN1					0.801886	0.776341	-0.0255452	0.0433913	0.0401528	-0.00323852	0.837438	0.832131	-0.00530713
FERMT3		0.810464	0.773728	-0.0367363	0.719244	0.695561	-0.0236823	0.655449	0.628268	-0.0271806	0.873359	0.819715	-0.0536443	0.826753	0.801831	-0.0249216	0.831335	0.807372	-0.0239632
FGF16		0.461371	0.453104	-0.0082665							0.109932	0.0958524	-0.0140798	0.519353	0.497551	-0.0218025	0.557806	0.566232	0.00842603
FGF2		0.0417175	0.0556775	0.01396	0.897068	0.826612	-0.0704556				0.559	0.535129	-0.0238709	0.730992	0.712132	-0.01886	0.429847	0.437399	0.00755172
FGFBP1	down	0.0695673	0.0671709	-0.00239638	0.927865	0.86099	-0.0668753	0.290944	0.281485	-0.00945927	0.774057	0.720639	-0.0534174	0.752836	0.71957	-0.033266	0.0733874	0.0771652	0.00377781
FGL1	up							0.899092	0.86275	-0.0363421	0.0345667	0.0396832	0.00511645	0.543988	0.511715	-0.0322731
FHL2	up	0.340211	0.328779	-0.0114319	0.839832	0.809878	-0.0299541	0.362103	0.342513	-0.0195899	0.615119	0.589575	-0.0255441	0.79165	0.756772	-0.0348784	0.08988	0.0818942	-0.00798578
FILIP1	up				0.669064	0.630658	-0.0384058	0.588864	0.551733	-0.0371308	0.710638	0.675522	-0.0351158	0.752196	0.737394	-0.014802	0.877868	0.833575	-0.044293
FLNC					0.401803	0.417913	0.0161096	0.627534	0.591294	-0.0362395	0.745087	0.738176	-0.00691167	0.508262	0.499291	-0.00897128	0.104705	0.10042	-0.00428515
FLT1	up	0.0515838	0.0532572	0.00167335							0.644949	0.622098	-0.022851	0.686686	0.664822	-0.0218642
FMO6P	down										0.604302	0.580749	-0.0235527	0.37267	0.340145	-0.0325245	0.0794279	0.0727644	-0.00666346
FMR1NB	up	0.487569	0.478157	-0.0094129										0.137351	0.132008	-0.00534247	0.69207	0.665143	-0.0269271
FNBP1L					0.697609	0.648427	-0.049182	0.0288485	0.0317734	0.00292488	0.384846	0.359223	-0.0256225	0.0738517	0.0787192	0.00486756	0.0847981	0.0819031	-0.002895
FOLR1	up	0.7525	0.70076	-0.0517402	0.719581	0.73898	0.0193984	0.619291	0.58037	-0.0389208	0.400733	0.394833	-0.00590003	0.880267	0.854378	-0.0258889
FOSL1	up	0.12704	0.136134	0.00909344	0.769366	0.719107	-0.0502591				0.457678	0.438351	-0.0193263	0.57891	0.564075	-0.0148351	0.0402975	0.0415081	0.00121061
FOXD1		0.0182473	0.0136535	-0.00459378	0.0501749	0.0552459	0.00507098	0.0955616	0.0922932	-0.0032684				0.0543961	0.055287	0.00089086
FOXG1		0.619558	0.601197	-0.018361										0.598854	0.572894	-0.0259601	0.608028	0.605838	-0.00219003
FOXI1	down	0.0914285	0.0846914	-0.00673709	0.79487	0.71946	-0.0754103				0.679977	0.690019	0.0100427	0.154265	0.146055	-0.00820995	0.0402652	0.0433476	0.0030824
FOXRED2		0.0242617	0.0169984	-0.00726327	0.730727	0.688435	-0.0422914	0.45896	0.43647	-0.0224896	0.868267	0.831843	-0.0364236	0.236881	0.216322	-0.0205597	0.00214305	0.00979474	0.00765169
FRMD6	up	0.926535	0.857232	-0.0693029	0.923952	0.875524	-0.0484284	0.541372	0.499357	-0.0420151	0.800761	0.734927	-0.0658343	0.385703	0.373704	-0.0119987	0.458363	0.430213	-0.0281504
FRZB		0.837059	0.847806	0.0107474	0.443882	0.46186	0.0179777	0.865838	0.843901	-0.0219379	0.611265	0.59888	-0.0123847	0.75012	0.759653	0.00953276	0.670071	0.678003	0.0079324
FSCN1	up	0.322322	0.335462	0.01314	0.789644	0.780808	-0.00883662	0.025096	0.0325929	0.00749689	0.642612	0.636151	-0.00646115	0.0740392	0.0730522	-0.000987073	0.0294953	0.0287201	-0.000775185
FSTL1	up				0.756647	0.765389	0.00874163	0.541588	0.534113	-0.0074756	0.775627	0.741921	-0.0337057	0.867618	0.846003	-0.0216156
FTO	down				0.8658	0.796587	-0.0692125				0.620017	0.585292	-0.0347251	0.0970662	0.102685	0.00561868
FUCA1		0.0442864	0.0456009	0.00131442	0.813548	0.794295	-0.0192529				0.440532	0.397956	-0.0425767	0.475064	0.46811	-0.00695423	0.105373	0.10108	-0.00429356
FXYD3	down				0.636633	0.570115	-0.0665178	0.0459803	0.0449352	-0.00104508	0.442413	0.426778	-0.0156352	0.0966905	0.0876562	-0.00903424	0.0576266	0.0523298	-0.00529679
FYN	up							0.746705	0.717424	-0.0292814	0.789554	0.772258	-0.0172955	0.156375	0.147513	-0.00886173	0.071336	0.0732868	0.00195076
GAA	down				0.875113	0.858976	-0.016137	0.0905679	0.0819306	-0.00863725	0.858132	0.827392	-0.0307397	0.190287	0.189565	-0.00072188	0.0100719	0.00890663	-0.00116524
GABARAPL1	up	0.0319023	0.0266196	-0.00528276	0.878488	0.855061	-0.023427				0.170872	0.165041	-0.00583097	0.219832	0.207168	-0.0126635	0.110617	0.109809	-0.000808702
GABRA2								0.528543	0.502477	-0.0260667	0.685168	0.684344	-0.000824067	0.612684	0.583611	-0.029073	0.778948	0.73687	-0.0420782
GABRA3	down	0.921481	0.869307	-0.0521741	0.492345	0.4893	-0.00304517	0.603895	0.568273	-0.035622	0.44514	0.449912	0.00477203	0.56641	0.523402	-0.0430073	0.707971	0.683358	-0.0246135
GABRG1					0.665789	0.650275	-0.0155146	0.658372	0.696852	0.0384798				0.611502	0.6329	0.0213988	0.744231	0.769228	0.024997
GABRQ		0.950063	0.920028	-0.0300349							0.779061	0.754722	-0.024339	0.947924	0.896373	-0.0515505	0.930734	0.885277	-0.045457
GADD45A	up							0.0562551	0.0553099	-0.000945185	0.109402	0.113077	0.00367488	0.26839	0.248477	-0.0199128	0.049589	0.0484534	-0.00113557
GAGE1					0.0389583	0.0454343	0.00647603				0.344302	0.339393	-0.00490897
GALM	up				0.834879	0.749532	-0.0853473	0.776041	0.732516	-0.0435253	0.595737	0.576279	-0.0194574	0.786647	0.759012	-0.0276355	0.751536	0.733719	-0.0178166
GANC	down										0.5074	0.482046	-0.0253537	0.0438253	0.0473132	0.00348788
GARS					0.906899	0.821098	-0.0858005	0.0352121	0.0357525	0.000540439	0.340278	0.323147	-0.0171308	0.450176	0.456322	0.00614575	0.0527517	0.0530011	0.000249321
GAS5											0.0802979	0.0787019	-0.00159599
GATA6	up				0.922161	0.883444	-0.0387172	0.0674927	0.0733911	0.00589839	0.90862	0.846645	-0.0619758	0.0200958	0.0203228	0.000226917	0.03973	0.0404035	0.000673495
GATSL2											0.0948713	0.0919804	-0.00289086	0.00976263	0.00803337	-0.00172926
GBP2	down	0.0502597	0.0421637	-0.00809604				0.546525	0.475774	-0.0707511	0.31841	0.302851	-0.0155598	0.68108	0.64806	-0.0330194
GCH1	up	0.0639107	0.0643652	0.000454423	0.875347	0.856851	-0.0184963	0.114453	0.112538	-0.0019151	0.356987	0.342392	-0.0145943	0.063437	0.0669274	0.00349037
GCNT4	up							0.862221	0.828563	-0.0336581				0.689105	0.647548	-0.0415563
GDA	up	0.49057	0.491893	0.00132293	0.667483	0.630632	-0.0368515				0.637621	0.624055	-0.0135665	0.9122	0.888518	-0.0236818	0.343723	0.35818	0.0144577
GDAP1	up	0.0414016	0.0402278	-0.00117382	0.86156	0.781101	-0.0804583				0.740205	0.702337	-0.0378688	0.10404	0.088277	-0.0157632	0.0422058	0.0417619	-0.000443938
GDF15		0.768121	0.738648	-0.0294732	0.810162	0.792223	-0.0179391				0.504074	0.499308	-0.0047657	0.659319	0.645794	-0.0135247	0.529561	0.54006	0.0104986
GDPD1	down	0.0571375	0.0679207	0.0107832	0.910179	0.843788	-0.0663909	0.00985304	0.00614362	-0.00370942	0.233906	0.218173	-0.0157334	0.0988219	0.0874423	-0.0113796	0.0278246	0.0283638	0.000539196
GFRA1		0.366415	0.364713	-0.00170241	0.109902	0.111114	0.00121253	0.264696	0.262548	-0.00214819	0.182749	0.179716	-0.00303247	0.479875	0.452122	-0.0277526
GGT1	down							0.309531	0.306992	-0.00253938	0.670342	0.669088	-0.0012533	0.689755	0.677525	-0.0122302	0.371901	0.361307	-0.0105939
GGT3P	down										0.398946	0.395846	-0.00309923	0.703506	0.677816	-0.0256891
GINS1		0.0278604	0.0328409	0.00498049	0.876325	0.853778	-0.0225469				0.307599	0.298285	-0.00931331	0.095838	0.0929005	-0.00293746	0.00993384	0.00909429	-0.000839548
GINS2					0.273452	0.294663	0.021211	0.00189235	0.00582092	0.00392857	0.438612	0.420038	-0.0185744	0.599296	0.5887	-0.010596	0.0346658	0.0350777	0.000411936
GIPC2		0.917071	0.870011	-0.0470594							0.823832	0.773926	-0.049906	0.817765	0.781395	-0.0363704	0.929333	0.864063	-0.0652704
GJB3	up	0.0823249	0.08218	-0.000144981	0.877574	0.815789	-0.0617849	0.744085	0.705435	-0.0386501	0.941527	0.872475	-0.0690521	0.479126	0.466888	-0.0122376	0.0973435	0.0968455	-0.000497976
GJC1		0.0710299	0.0730384	0.00200848	0.902176	0.889565	-0.0126117	0.566224	0.549177	-0.0170468	0.874464	0.860174	-0.0142896	0.466421	0.437459	-0.0289625
GKN2											0.828405	0.821867	-0.00653797	0.834433	0.812242	-0.0221902
GLA											0.877488	0.859704	-0.0177843	0.0376721	0.0494281	0.011756
GLB1L3	up				0.473666	0.412624	-0.0610413	0.490096	0.490671	0.000575567	0.719124	0.697901	-0.0212222	0.749671	0.720495	-0.0291757	0.657849	0.641474	-0.016375
GLDC		0.168996	0.177971	0.00897503	0.781723	0.766107	-0.0156155	0.0577633	0.0476509	-0.0101124	0.845619	0.814355	-0.0312638	0.554272	0.489499	-0.0647735	0.0661039	0.0769276	0.0108237
GLI1					0.0954939	0.0886362	-0.00685768	0.187671	0.184803	-0.00286831	0.132683	0.139998	0.00731483	0.0571546	0.0647082	0.00755356	0.0558867	0.0596587	0.00377205
GLIPR1	up	0.169243	0.169574	0.000331067							0.756839	0.726317	-0.0305224	0.901589	0.844521	-0.0570681	0.440068	0.389691	-0.050377
GLTSCR2		0.123514	0.113652	-0.00986213	0.844195	0.839456	-0.00473933				0.564851	0.547783	-0.0170686	0.258854	0.254199	-0.00465411	0.0523305	0.0552691	0.00293862
GLYATL2	down				0.851891	0.750925	-0.100966	0.889656	0.809674	-0.0799821	0.908521	0.854144	-0.0543768	0.0755052	0.0774566	0.00195133	0.0349956	0.0287275	-0.00626812
GMDS	down				0.936516	0.926083	-0.0104326	0.027446	0.0231003	-0.00434564	0.767602	0.72194	-0.0456624	0.0765449	0.0682027	-0.00834222	0.0236139	0.0242332	0.000619323
GMFG	up				0.0371654	0.0479025	0.0107371	0.759549	0.734569	-0.0249803	0.749316	0.711633	-0.0376831	0.621016	0.625061	0.00404494	0.819715	0.811133	-0.0085826
GMNN		0.0308193	0.0312185	0.000399163				0.0702518	0.076063	0.00581122				0.0430654	0.0501192	0.00705376	0.0718325	0.0679452	-0.00388728
GNA14		0.733392	0.709733	-0.0236594							0.600021	0.584368	-0.0156535	0.450272	0.460778	0.0105062	0.531354	0.570841	0.0394864
GNG11	up	0.0571084	0.0613124	0.00420406										0.812792	0.727935	-0.0848571	0.118297	0.114386	-0.0039111
GPC4	up	0.0134082	0.0105544	-0.00285376	0.48557	0.504134	0.0185639	0.0152535	0.0186765	0.00342297	0.839311	0.782781	-0.0565301	0.240956	0.249247	0.00829054	0.014746	0.0152686	0.000522617
GPC6	down	0.0571348	0.051829	-0.00530587	0.710589	0.716484	0.00589467				0.584384	0.575638	-0.00874601	0.545916	0.485836	-0.0600808	0.0625248	0.0612225	-0.00130232
GPD1L	down	0.0316707	0.028072	-0.00359875	0.861108	0.818015	-0.043093				0.156011	0.15117	-0.00484133	0.118739	0.125883	0.00714354	0.0272688	0.027111	-0.000157801
GPD2		0.0774741	0.0730192	-0.00445483	0.864435	0.73484	-0.129595	0.301366	0.275608	-0.0257583	0.839891	0.781246	-0.0586453	0.318437	0.294806	-0.0236307
GPHN	down	0.0714464	0.0750507	0.00360429	0.826102	0.794831	-0.0312709				0.471404	0.437436	-0.0339687	0.885832	0.806554	-0.0792785	0.0572386	0.0556406	-0.00159794
GPR110	down				0.898226	0.797516	-0.10071	0.0535479	0.0528034	-0.000744477	0.856866	0.812444	-0.0444215	0.551965	0.488778	-0.0631867	0.053806	0.0582777	0.00447172
GPR155					0.906496	0.921047	0.014551	0.4678	0.436332	-0.0314678	0.04877	0.0448581	-0.00391185	0.258746	0.240429	-0.0183165	0.0470986	0.0513086	0.00421
GPR85		0.862521	0.837298	-0.025223	0.869539	0.799098	-0.0704404	0.873083	0.809349	-0.0637339	0.71264	0.701632	-0.0110086	0.770233	0.720918	-0.0493159
GPR87	up							0.527828	0.469515	-0.0583132	0.0964638	0.092288	-0.00417574
GPRC5A	up	0.0624957	0.0616789	-0.000816774	0.872539	0.875448	0.00290933	0.567542	0.571924	0.0043819	0.770995	0.767395	-0.0035998	0.0792081	0.0773307	-0.00187747	0.0560079	0.0576411	0.00163324
GPRC5B		0.00791946	0.00962514	0.00170568	0.921809	0.908604	-0.0132044	0.680784	0.674987	-0.00579735	0.892279	0.862733	-0.0295454	0.577853	0.554134	-0.0237188	0.170089	0.167294	-0.00279484
GPX7		0.926303	0.888153	-0.0381493	0.917874	0.875949	-0.0419254				0.795764	0.76828	-0.0274839	0.767254	0.724587	-0.0426669	0.874102	0.791641	-0.0824611
GRB10					0.917103	0.864991	-0.0521123	0.588543	0.577312	-0.0112311	0.655127	0.65861	0.00348281	0.744826	0.731557	-0.0132692
GREM1					0.814049	0.778346	-0.0357028	0.796531	0.77848	-0.0180511	0.698988	0.670571	-0.0284168	0.826245	0.82108	-0.00516507	0.388748	0.351833	-0.0369157
GRHL1					0.864125	0.824893	-0.0392315	0.0278562	0.0270316	-0.000824597	0.467682	0.448328	-0.0193541	0.301592	0.309781	0.00818837	0.0336928	0.0299922	-0.00370058
GTF2I	down				0.859413	0.835303	-0.0241108	0.272596	0.269721	-0.00287512	0.866022	0.816687	-0.0493351	0.0780389	0.0757165	-0.00232243	0.0147176	0.0141999	-0.000517672
GTF2IRD2B	down							0.279626	0.266783	-0.012843	0.888247	0.815117	-0.0731304
GTPBP2		0.108231	0.0997202	-0.00851084	0.841198	0.808407	-0.032791				0.754369	0.713758	-0.0406105
GTSF1	up				0.550333	0.524566	-0.0257672	0.731245	0.736198	0.00495238	0.765931	0.792644	0.0267124	0.542993	0.517521	-0.025472	0.816736	0.80844	-0.0082959
GUCY1B3		0.0527945	0.0538469	0.00105233	0.780384	0.718429	-0.0619552				0.404296	0.379994	-0.0243016	0.891938	0.83767	-0.054268	0.130907	0.122299	-0.00860766
GULP1								0.252819	0.243251	-0.00956861	0.520553	0.496022	-0.0245303	0.479513	0.46948	-0.0100332	0.788	0.797735	0.00973496
GYPC					0.0390803	0.0390988	1.84667e-05	0.539065	0.558292	0.0192266	0.325723	0.303339	-0.0223839	0.49944	0.48809	-0.0113505	0.324592	0.298636	-0.0259557
H19	up										0.850714	0.829861	-0.0208536	0.0667918	0.065401	-0.00139084	0.123388	0.121374	-0.00201353
H1F0	down	0.203732	0.208457	0.00472503										0.615759	0.608529	-0.00723003	0.0161159	0.00983408	-0.00628186
H1FX	down	0.0644739	0.0667013	0.00222744										0.0571219	0.0586087	0.00148684	0.0465369	0.0500101	0.00347326
H2AFY2	down				0.960843	0.926133	-0.0347106	0.448271	0.456579	0.00830731	0.940807	0.880912	-0.0598958	0.568238	0.54109	-0.0271482	0.286977	0.272842	-0.0141353
HAP1	up	0.110989	0.104778	-0.00621158	0.810493	0.821171	0.0106778				0.769808	0.756517	-0.0132911	0.28141	0.280798	-0.000611536	0.0522881	0.0521071	-0.000180933
HAPLN1	up	0.467767	0.483423	0.0156562	0.676561	0.716445	0.0398838	0.32845	0.331209	0.00275896	0.454367	0.430623	-0.0237439	0.742289	0.727012	-0.0152768	0.515507	0.53404	0.0185329
HBEGF	up	0.052889	0.0504394	-0.00244966	0.673786	0.711854	0.0380674				0.606241	0.602576	-0.00366478	0.109147	0.102127	-0.00702037
HCG11											0.276488	0.267	-0.00948834	0.0656728	0.0709142	0.00524149	0.0721685	0.0796352	0.00746667
HCLS1	up	0.828585	0.793194	-0.0353905							0.726422	0.715631	-0.0107912	0.882049	0.844649	-0.0374005	0.796936	0.67946	-0.117476
HECW2	down				0.83359	0.733847	-0.0997431	0.35557	0.339539	-0.0160317	0.755498	0.71665	-0.0388479	0.0563352	0.0558898	-0.000445388	0.0529639	0.0526453	-0.000318564
HEG1	up	0.0319882	0.026522	-0.00546628	0.652338	0.627933	-0.0244046				0.765439	0.728499	-0.03694	0.524281	0.482632	-0.0416489	0.0303262	0.0272622	-0.00306401
HELLS		0.0285468	0.0298004	0.00125358							0.226803	0.216332	-0.0104714	0.247209	0.244264	-0.00294525	0.0441756	0.0498355	0.00565988
HERC5	up	0.023372	0.0278485	0.00447655	0.327553	0.296767	-0.0307866				0.793355	0.76212	-0.0312349	0.0935271	0.0937868	0.000259714	0.0591339	0.0557131	-0.00342078
HERPUD1		0.0387731	0.039916	0.00114291							0.28923	0.268949	-0.0202811	0.215331	0.229446	0.0141147	0.268464	0.276522	0.00805853
HFE	down	0.104153	0.117917	0.0137641	0.890992	0.8198	-0.0711921				0.0597648	0.0609166	0.00115181	0.748317	0.68114	-0.0671772
HHIP		0.215174	0.214042	-0.00113188							0.609637	0.569171	-0.0404662	0.816231	0.776171	-0.04006	0.3087	0.338284	0.0295844
HIPK2	down	0.052858	0.048351	-0.00450695	0.865802	0.834124	-0.0316776				0.79639	0.759888	-0.036502
HIST1H1A	down	0.084358	0.0782884	-0.00606965	0.101248	0.0861711	-0.015077	0.0607766	0.0634161	0.00263947				0.913116	0.843059	-0.0700564	0.120923	0.115901	-0.0050217
HIST1H1B	down	0.38786	0.3839	-0.0039596										0.913133	0.865889	-0.0472441	0.442582	0.44955	0.00696795
HIST1H1C	down	0.0988109	0.0988383	2.74111e-05				0.0966245	0.0901111	-0.00651341				0.0894652	0.0826419	-0.00682326	0.0244608	0.024885	0.000424168
HIST1H1D	down	0.102862	0.0990926	-0.00376972	0.261922	0.244194	-0.0177283							0.293884	0.268855	-0.0250297	0.0456644	0.0429162	-0.00274817
HIST1H1E	down	0.0431196	0.0414564	-0.00166318										0.0546765	0.0530991	-0.0015774	0.041121	0.0384555	-0.00266545
HIST1H1T	up	0.890683	0.833713	-0.0569697				0.881164	0.820941	-0.0602223				0.86748	0.829038	-0.0384421	0.9269	0.87587	-0.0510299
HIST1H2AA	up													0.859428	0.752135	-0.107292	0.899139	0.847591	-0.0515482
HIST1H2AB	down													0.476948	0.425109	-0.0518389	0.0614767	0.060425	-0.00105173
HIST1H2AC	down	0.135043	0.134514	-0.000529852										0.0558036	0.0577562	0.00195259	0.0489706	0.0460243	-0.00294636
HIST1H2AD	down				0.0216425	0.0237531	0.00211059										0.0549717	0.0725431	0.0175714
HIST1H2AE	down													0.148432	0.136442	-0.0119898	0.0433132	0.0480222	0.00470901
HIST1H2AI		0.0669668	0.0694349	0.00246811										0.515713	0.497853	-0.0178605	0.0597714	0.0535687	-0.00620268
HIST1H2AJ	down	0.070346	0.0744667	0.00412069										0.745524	0.704956	-0.0405685
HIST1H2AK	down													0.598164	0.569569	-0.0285954
HIST1H2BA	up	0.882891	0.817476	-0.0654157										0.821851	0.788321	-0.03353
HIST1H2BD	down	0.354952	0.352302	-0.00264991	0.235479	0.210451	-0.0250277	0.0533793	0.0516103	-0.00176898				0.0810645	0.0836986	0.00263405	0.0492648	0.0498395	0.000574782
HIST1H2BF	down													0.0693043	0.0706815	0.00137721
HIST1H2BI	down	0.53991	0.525516	-0.0143936	0.419045	0.414775	-0.0042699										0.316561	0.286741	-0.0298193
HIST1H2BJ														0.0536143	0.0475492	-0.00606503	0.0432425	0.0457596	0.00251719
HIST1H2BM	down													0.0459127	0.0480298	0.00211717	0.0436069	0.0411486	-0.00245833
HIST1H2BN		0.0516045	0.0499306	-0.00167393										0.0688422	0.0716182	0.002776	0.0543536	0.0523935	-0.00196001
HIST1H3B	down	0.124792	0.126213	0.00142097										0.0564106	0.0587911	0.00238052	0.047053	0.0482589	0.00120591
HIST1H3G	down	0.365685	0.36813	0.00244552	0.334133	0.352547	0.0184142							0.247802	0.237311	-0.0104909	0.305809	0.312454	0.00664565
HIST1H3I	down	0.132235	0.129437	-0.00279868													0.0432235	0.0455081	0.00228459
HIST1H4B	down	0.094844	0.0883072	-0.00653681	0.0228722	0.0336017	0.0107295							0.885327	0.793648	-0.0916796	0.0317992	0.0300863	-0.00171289
HIST1H4D	down	0.079331	0.0776193	-0.00171169	0.131221	0.124716	-0.00650497							0.442665	0.41647	-0.0261959	0.0454933	0.0438226	-0.00167072
HIST1H4H		0.0657532	0.0583985	-0.00735472										0.053894	0.0569849	0.00309089	0.0798125	0.0833998	0.00358731
HIST1H4L		0.113967	0.10985	-0.00411726										0.744021	0.692024	-0.051997	0.0767646	0.0774884	0.000723893
HIST2H2AA4	down													0.0556172	0.0540037	-0.00161354
HIST2H2AB	down	0.0344409	0.0340213	-0.000419542										0.0644012	0.0670731	0.00267194	0.0420078	0.041988	-1.97967e-05
HIST2H2BA	down										0.752834	0.686706	-0.0661274	0.605294	0.581186	-0.0241076
HIST3H2BB	down				0.0346472	0.0420733	0.00742609							0.0506643	0.051508	0.000843625
HKDC1	up				0.847167	0.785025	-0.0621422	0.81591	0.803666	-0.0122437	0.721426	0.700504	-0.0209217	0.867829	0.841308	-0.026521
HLCS	down				0.900255	0.841874	-0.0583801	0.3995	0.37506	-0.0244398				0.381412	0.370856	-0.0105554	0.0319386	0.038537	0.00659836
HLTF					0.882354	0.821113	-0.0612408	0.0130036	0.010406	-0.00259755	0.211521	0.207635	-0.00388569	0.824753	0.781461	-0.043292	0.0589973	0.0662605	0.00726318
HMGB3		0.0355618	0.0381836	0.00262185	0.835162	0.789377	-0.0457852	0.0895473	0.076799	-0.0127482				0.522069	0.49571	-0.026359	0.0411413	0.0394782	-0.0016631
HMGCL	down	0.0082541	0.00950393	0.00124983							0.477107	0.462929	-0.0141776	0.726191	0.696025	-0.0301656	0.051108	0.049978	-0.00112998
HMGCR		0.022341	0.0179853	-0.00435578	0.875761	0.830993	-0.0447677	0.17234	0.160319	-0.0120206	0.500521	0.433865	-0.0666555	0.0552044	0.0473666	-0.00783781	0.0407948	0.0440213	0.00322655
HMGCS1					0.902074	0.851421	-0.0506522	0.471646	0.444461	-0.0271845	0.863286	0.828696	-0.0345899	0.392342	0.381407	-0.0109351	0.0420533	0.0385814	-0.00347191
HNRNPA1L2		0.0408998	0.0459801	0.00508036				0.781329	0.746959	-0.03437	0.765836	0.758412	-0.007424	0.0714394	0.0648438	-0.00659554	0.0521158	0.0565587	0.00444284
HOOK1		0.0923803	0.0968562	0.00447593	0.913121	0.809541	-0.10358	0.0168071	0.0181023	0.00129522	0.483661	0.45945	-0.0242115	0.0594413	0.0601569	0.000715575	0.0230145	0.0250639	0.00204943
HORMAD1		0.900773	0.871798	-0.0289747				0.95897	0.933923	-0.0250468	0.803833	0.734821	-0.069012				0.90389	0.840047	-0.0638437
HOXA4		0.202398	0.205003	0.00260463	0.850858	0.761345	-0.0895135	0.0265501	0.0269622	0.000412145	0.787718	0.759541	-0.0281769	0.522222	0.49446	-0.0277619	0.0306188	0.0320423	0.00142351
HOXB2	up	0.894019	0.84973	-0.0442888	0.208211	0.229984	0.0217734				0.391732	0.378911	-0.0128216	0.831722	0.790388	-0.0413335	0.868553	0.836109	-0.0324446
HOXB5	up				0.835596	0.856607	0.0210108
HOXD13		0.577011	0.553439	-0.0235729	0.59248	0.555466	-0.0370138				0.509885	0.49966	-0.0102245	0.516447	0.514492	-0.0019546	0.488466	0.495117	0.00665088
HPSE	up	0.0408616	0.0442886	0.00342702				0.0478735	0.0538036	0.00593004	0.645486	0.636837	-0.00864872	0.201329	0.183563	-0.0177659
HRASLS	down	0.0171478	0.0154492	-0.00169864				0.468648	0.435734	-0.0329136	0.907174	0.865733	-0.041441	0.396953	0.415318	0.0183649
HRASLS5		0.932137	0.820262	-0.111874	0.149233	0.154553	0.0053203				0.879926	0.833377	-0.0465488	0.805387	0.778761	-0.0266264	0.889842	0.864792	-0.0250496
HSD17B2	up				0.561479	0.537607	-0.023872	0.545369	0.52946	-0.0159092	0.714893	0.673937	-0.0409566	0.354264	0.372243	0.017979	0.294001	0.280035	-0.0139667
HSD17B6								0.659978	0.585545	-0.0744326	0.92234	0.8568	-0.0655399
HSPA13								0.0565367	0.0573772	0.000840488	0.384456	0.35015	-0.0343061	0.0457741	0.044277	-0.00149713	0.0594128	0.0584206	-0.000992223
HSPA1A		0.0397165	0.0399686	0.000252144										0.0478031	0.0483636	0.000560526	0.0680273	0.0693791	0.00135182
HSPA1B		0.05504	0.053414	-0.00162602	0.0393512	0.0513245	0.0119733							0.0778089	0.0789614	0.00115257	0.0987268	0.0962866	-0.00244026
HSPA2	up	0.635478	0.611281	-0.0241969	0.875286	0.81337	-0.0619159							0.129733	0.12885	-0.000882957	0.0334567	0.0314557	-0.00200103
HSPA8		0.0358147	0.0402993	0.00448454				0.0747589	0.0684185	-0.00634037	0.183055	0.182008	-0.00104682	0.0738312	0.0730818	-0.000749482	0.0692526	0.0652851	-0.00396751
HSPB6		0.892454	0.759742	-0.132712	0.920505	0.906093	-0.0144112				0.892997	0.858649	-0.0343482	0.0776406	0.080121	0.00248047	0.813723	0.7628	-0.0509231
HTR1D	up	0.914479	0.889529	-0.0249499	0.816177	0.803844	-0.0123335							0.679881	0.672719	-0.0071616	0.0625213	0.0633777	0.00085643
HTRA1	down	0.0396181	0.0371559	-0.00246222	0.87933	0.833684	-0.0456464				0.59075	0.567644	-0.0231061	0.560704	0.532034	-0.0286701	0.0539995	0.0602186	0.00621909
HYAL1					0.485907	0.484433	-0.0014741	0.776439	0.765497	-0.010942	0.892602	0.845333	-0.047269	0.858738	0.842463	-0.0162748	0.80239	0.801908	-0.00048215
ICAM1	up	0.036199	0.0383184	0.00211946							0.464908	0.443582	-0.0213264	0.179357	0.184405	0.00504766	0.148307	0.151381	0.00307358
ID4	up	0.0668681	0.0659711	-0.000897037	0.0644678	0.060037	-0.00443082				0.0767948	0.0794726	0.00267776	0.687046	0.676309	-0.0107376	0.0733721	0.0758612	0.00248905
IDI1		0.0477129	0.0613368	0.0136239	0.882829	0.831315	-0.0515143				0.0617305	0.0575956	-0.00413492	0.065315	0.0581565	-0.00715851	0.0346404	0.0345184	-0.000122021
IDS	up	0.0492092	0.0540117	0.0048025							0.650441	0.638502	-0.0119394	0.841936	0.800295	-0.0416407	0.0641686	0.0617828	-0.0023858
IFI30		0.0861662	0.0894302	0.00326395	0.965943	0.944339	-0.0216038				0.0910982	0.0878577	-0.00324055	0.694896	0.682878	-0.0120183	0.122111	0.119356	-0.00275436
IFI44											0.682495	0.64545	-0.0370455	0.145428	0.148585	0.00315657
IFI6	up	0.0493964	0.0513174	0.00192099				0.457755	0.45044	-0.00731447	0.549761	0.528308	-0.0214531	0.319951	0.315988	-0.00396289	0.056022	0.0590206	0.00299861
IFIT1	up							0.0466782	0.0462679	-0.000410283	0.893799	0.842551	-0.0512472	0.0442659	0.0395823	-0.00468359	0.0364473	0.0612459	0.0247986
IFIT3	up							0.040588	0.0443841	0.00379613	0.623021	0.598204	-0.0248172				0.0761851	0.0712223	-0.00496279
IFT57	up				0.817578	0.755447	-0.0621309	0.0223125	0.0141397	-0.00817279	0.500107	0.488725	-0.0113817				0.0566835	0.0560364	-0.000647105
IGF2BP1		0.422533	0.396329	-0.0262037	0.861999	0.829481	-0.0325175				0.53553	0.521668	-0.0138627	0.147032	0.143693	-0.00333925	0.054153	0.0405646	-0.0135884
IGF2BP2	up	0.433247	0.410091	-0.0231559				0.327746	0.31277	-0.0149763	0.459152	0.435145	-0.0240071	0.200016	0.206605	0.00658927
IGFBP7	up	0.977698	0.916896	-0.0608022							0.688779	0.670043	-0.0187357	0.898635	0.870378	-0.028257	0.969063	0.909746	-0.0593177
IKZF2	down	0.067056	0.06785	0.000793983	0.788606	0.759628	-0.0289774				0.865079	0.781126	-0.0839533	0.0801786	0.0897454	0.00956687	0.0807779	0.0894809	0.00870299
IL11					0.845963	0.813306	-0.0326569				0.171153	0.17085	-0.000302381	0.504191	0.501099	-0.00309135	0.122856	0.144988	0.0221317
IL12RB2					0.81513	0.751814	-0.0633164	0.908598	0.871964	-0.0366337	0.693003	0.658137	-0.0348662				0.877697	0.818582	-0.0591148
IL13RA2	up							0.873169	0.788262	-0.0849072				0.730102	0.668869	-0.0612334	0.888096	0.804931	-0.083166
IL17RE	down	0.0668479	0.0733906	0.00654272	0.878412	0.83911	-0.0393016				0.876819	0.826479	-0.0503402	0.881765	0.852343	-0.0294223	0.100802	0.104478	0.00367556
IL18R1					0.813645	0.782777	-0.0308685				0.709476	0.646879	-0.0625964	0.722052	0.725172	0.00311982
IL1A		0.868108	0.837986	-0.0301222							0.761202	0.722437	-0.0387648	0.806205	0.751488	-0.0547171
IL1B		0.534571	0.538097	0.00352637	0.829052	0.849743	0.0206904	0.89845	0.852457	-0.0459936	0.854705	0.83795	-0.0167553	0.599058	0.582174	-0.016884	0.395879	0.406364	0.0104846
IL1RAPL1					0.0600882	0.082069	0.0219808	0.299674	0.320467	0.0207932	0.257852	0.237533	-0.0203197	0.24737	0.270125	0.022755	0.247014	0.231513	-0.0155014
IL20RB		0.925275	0.898223	-0.0270515	0.849234	0.790676	-0.0585585				0.477795	0.465342	-0.0124532	0.882792	0.801257	-0.0815355	0.85792	0.811463	-0.0464568
IL23A	up							0.832078	0.812223	-0.0198545	0.87158	0.867127	-0.00445263	0.638325	0.63934	0.00101504	0.746731	0.755403	0.00867247
IL24	up	0.894098	0.873678	-0.0204193				0.890246	0.787768	-0.102478	0.890689	0.861443	-0.0292463	0.457082	0.439369	-0.0177131
IL2RG	up	0.863085	0.821224	-0.0418613										0.79327	0.779261	-0.0140093	0.660785	0.669447	0.00866108
IL6	up							0.084767	0.0980425	0.0132756	0.517073	0.520409	0.00333544	0.461815	0.457162	-0.00465252	0.0291466	0.0118886	-0.017258
IL6R	up				0.774764	0.751873	-0.0228913	0.0184937	0.0160107	-0.00248296	0.585865	0.553846	-0.0320191	0.638846	0.618365	-0.0204811	0.0922219	0.100044	0.00782252
IL7R	up	0.187872	0.180525	-0.00734703							0.75048	0.672054	-0.0784255	0.891112	0.845127	-0.0459852
ILF2											0.110377	0.119786	0.00940889	0.0781934	0.083014	0.00482062	0.0376475	0.0352606	-0.00238688
IMPA1	up	0.0100706	0.00374635	-0.0063243	0.809177	0.766272	-0.042905	0.351545	0.309738	-0.0418073	0.811582	0.766226	-0.0453558	0.700668	0.667752	-0.0329165	0.0734701	0.0667304	-0.00673967
IMPA2	down	0.0598222	0.06798	0.00815777	0.901415	0.833283	-0.0681317				0.303287	0.298312	-0.00497546	0.0718708	0.0683374	-0.00353336	0.0356845	0.0377566	0.00207207
INA	up	0.0871272	0.0815676	-0.00555961	0.84073	0.868233	0.0275026				0.618101	0.600568	-0.017533	0.895433	0.857113	-0.0383201	0.409813	0.392134	-0.0176791
INHBA	up							0.544614	0.501437	-0.0431772	0.805637	0.774155	-0.0314819
INPP5A	down	0.054335	0.0563345	0.00199946	0.895148	0.85872	-0.0364279				0.856742	0.82751	-0.0292318	0.0801408	0.0818014	0.00166058	0.0673092	0.07132	0.00401089
INPP5F	up				0.88619	0.803799	-0.0823902	0.0973936	0.093963	-0.00343059	0.789305	0.750348	-0.0389574	0.0845308	0.0804296	-0.00410119
INSIG1	down				0.881782	0.797897	-0.083885	0.0293449	0.0285288	-0.000816073	0.310959	0.297394	-0.0135653	0.147068	0.152761	0.00569316	0.0107474	0.00695411	-0.00379333
INSL6		0.681492	0.656749	-0.0247432							0.785995	0.709481	-0.0765136	0.797676	0.736674	-0.0610016	0.62584	0.618441	-0.00739907
IPP	down							0.525808	0.505574	-0.0202336	0.126413	0.117333	-0.00908034	0.453716	0.461572	0.00785633	0.330572	0.323214	-0.0073586
IPW											0.118224	0.0911432	-0.0270811	0.0741239	0.0737149	-0.000408988
IQCE	down	0.0738859	0.0751679	0.00128203	0.779055	0.764911	-0.014144				0.847259	0.820081	-0.0271778	0.77495	0.757337	-0.0176128	0.228565	0.21931	-0.00925578
IQGAP2	up				0.866915	0.757765	-0.10915	0.97087	0.894765	-0.0761044	0.818581	0.778649	-0.039932	0.0608881	0.0580088	-0.00287929
IRAK3		0.0211736	0.0244783	0.00330466	0.78344	0.785772	0.002332				0.60381	0.570062	-0.0337474	0.763631	0.733431	-0.0301992	0.811352	0.753121	-0.0582303
IRF2BP2	down	0.0469327	0.0448352	-0.00209746	0.0492126	0.0552568	0.00604419				0.0954139	0.0969572	0.0015433	0.0361463	0.0364896	0.000343272
IRS2	up	0.532578	0.501755	-0.0308236	0.907759	0.837779	-0.0699802	0.0227095	0.0180188	-0.00469074	0.740477	0.683897	-0.0565798	0.143701	0.136536	-0.00716508	0.0490051	0.0494947	0.000489532
IRX3	down				0.131171	0.128542	-0.00262818	0.17032	0.180189	0.00986982	0.0716061	0.0732171	0.001611	0.222236	0.213758	-0.0084776	0.0951854	0.103804	0.00861861
ITGA2	up	0.0768226	0.0797529	0.00293032	0.910934	0.859436	-0.0514984				0.555641	0.508344	-0.0472971	0.0352209	0.0363253	0.0011044	0.073387	0.0609842	-0.0124028
ITGA3		0.0429499	0.0420058	-0.000944087	0.811945	0.794081	-0.0178644				0.382734	0.373799	-0.00893503	0.208049	0.215122	0.00707357
ITGA5	up	0.0706046	0.0792527	0.00864802				0.048304	0.0458173	-0.00248664	0.82071	0.803751	-0.0169593	0.0869856	0.0810252	-0.00596049	0.104111	0.116932	0.0128212
ITGB3					0.725953	0.708474	-0.0174796				0.426032	0.414682	-0.0113499	0.734439	0.719573	-0.0148664	0.466616	0.480912	0.0142956
ITGB6	down	0.0500618	0.053629	0.00356711							0.918739	0.871097	-0.0476417	0.694705	0.658733	-0.0359722	0.0512346	0.0557158	0.00448123
ITGBL1		0.578224	0.579756	0.00153209							0.458661	0.441785	-0.0168761	0.714618	0.680919	-0.0336991	0.620139	0.601728	-0.0184113
JAG1	up	0.0435674	0.0480271	0.00445972	0.91237	0.850112	-0.0622578				0.367796	0.358343	-0.00945284	0.0426425	0.0397816	-0.00286088	0.0662609	0.0686255	0.00236461
JMY		0.0745927	0.0740049	-0.00058772	0.693122	0.578357	-0.114766				0.682998	0.628796	-0.054202	0.256837	0.250067	-0.00677088	0.0524238	0.0508913	-0.0015325
JUNB		0.0573943	0.0553366	-0.00205767	0.0695906	0.0740423	0.00445165	0.0640174	0.0669656	0.00294817				0.109958	0.112845	0.00288653	0.0320106	0.0323174	0.000306739
JUP		0.0817228	0.0715705	-0.0101523	0.846827	0.823179	-0.023648	0.402247	0.388516	-0.0137317	0.894568	0.877053	-0.0175149	0.200198	0.191531	-0.00866739	0.0618847	0.0623375	0.000452817
KATNAL1	up	0.00603896	0.00514704	-0.000891912	0.843846	0.755571	-0.0882752	0.167334	0.158145	-0.00918971	0.812217	0.789869	-0.0223475	0.481857	0.448237	-0.0336208	0.0494306	0.047729	-0.0017016
KBTBD8	up				0.716116	0.659616	-0.0565003	0.0537919	0.0491972	-0.00459475	0.32605	0.31103	-0.0150197	0.0793471	0.0831805	0.00383347	0.0685681	0.0717807	0.00321254
KC6											0.155758	0.161617	0.00585947
KCNG1					0.615348	0.609825	-0.00552338	0.797348	0.754471	-0.0428773	0.869518	0.821903	-0.0476156	0.337312	0.330296	-0.00701584
KCNH7	down	0.761069	0.709334	-0.0517351	0.772131	0.694308	-0.0778226				0.736903	0.706494	-0.0304088	0.0726475	0.0703091	-0.00233844
KCNJ2	up				0.702328	0.684047	-0.0182815	0.270817	0.263085	-0.00773156	0.661662	0.656928	-0.00473404	0.884301	0.8101	-0.0742015	0.066366	0.0630692	-0.0032968
KCNK1	up	0.0433202	0.0507737	0.00745354							0.634985	0.592686	-0.0422982	0.0425877	0.0426292	4.15162e-05	0.0588043	0.0570102	-0.0017941
KCNMA1		0.500712	0.500041	-0.000671	0.050619	0.0580273	0.00740833				0.107994	0.107516	-0.00047833	0.598579	0.564672	-0.0339074
KCTD18		0.0642321	0.0659582	0.00172616	0.84628	0.834444	-0.0118353	0.864624	0.844606	-0.0200174	0.911873	0.842592	-0.069281	0.087689	0.0829051	-0.00478395	0.010334	0.00346497	-0.00686906
KDELR3		0.0702133	0.0683263	-0.00188699	0.912443	0.852407	-0.0600363	0.00267516	0.00407382	0.00139866	0.945685	0.931735	-0.0139493	0.748401	0.740183	-0.00821738	0.326786	0.334022	0.00723618
KDM1B											0.615454	0.595093	-0.0203609	0.0370768	0.0316979	-0.00537884	0.0471865	0.0468179	-0.000368612
KDR		0.0460187	0.0499026	0.00388391	0.892577	0.855747	-0.0368299				0.758166	0.696476	-0.0616904	0.177053	0.176506	-0.000546251	0.0435168	0.049376	0.00585918
KGFLP2											0.515046	0.495543	-0.0195024
KIAA0040	up	0.0582615	0.0583763	0.000114876	0.755746	0.710955	-0.0447912	0.309057	0.301194	-0.00786239				0.346612	0.331548	-0.0150636	0.0540044	0.052202	-0.00180245
KIAA0101		0.0545541	0.0486117	-0.00594236							0.0618961	0.0568596	-0.00503653	0.891568	0.85415	-0.037418	0.032556	0.0368199	0.00426392
KIAA0247					0.695497	0.678131	-0.0173658	0.316575	0.29969	-0.0168856	0.73914	0.701956	-0.0371842	0.358602	0.358516	-8.59129e-05
KIAA0355	up				0.865526	0.871118	0.00559173	0.371679	0.346167	-0.0255115	0.784198	0.752245	-0.0319532	0.605785	0.57995	-0.0258348	0.0881899	0.0906959	0.00250603
KIAA1147	down				0.902303	0.87222	-0.0300825				0.616875	0.60157	-0.015305	0.0660543	0.0690932	0.00303893
KIAA1217	down	0.0420822	0.0446681	0.00258587	0.857021	0.802378	-0.0546424	0.344	0.32977	-0.0142302	0.620213	0.587684	-0.032529	0.455292	0.440281	-0.0150109	0.762548	0.717029	-0.0455183
KIAA1324	down	0.0817979	0.0906134	0.00881554	0.879182	0.838939	-0.0402425	0.0435443	0.0491228	0.00557843	0.408308	0.396866	-0.0114419	0.673567	0.638508	-0.0350592	0.084422	0.0884048	0.00398276
KIAA1324L		0.0983869	0.0986439	0.000256975							0.200179	0.199642	-0.000536984	0.141262	0.118624	-0.0226375	0.0141974	0.0130853	-0.00111204
KIAA1524	up							0.0724018	0.0718382	-0.000563513	0.927146	0.841485	-0.0856611	0.0876277	0.0806274	-0.00700021
KIAA1841								0.039243	0.0394482	0.000205272	0.881941	0.832307	-0.0496335	0.178711	0.151098	-0.0276135
KIF20A											0.882112	0.859663	-0.0224492
KIF5C	up	0.0906211	0.075138	-0.0154831	0.897461	0.872501	-0.0249604	0.0603662	0.0575121	-0.00285409	0.697362	0.670664	-0.0266975	0.614861	0.576261	-0.0385997	0.0424105	0.0445691	0.00215862
KIR2DL3											0.0536728	0.0524862	-0.00118661	0.0979213	0.0998466	0.00192529	0.100925	0.101597	0.00067246
KISS1	up	0.837904	0.80458	-0.0333236	0.521492	0.515728	-0.00576443	0.630818	0.611805	-0.0190122	0.817101	0.815377	-0.00172362	0.896851	0.867257	-0.0295936	0.57563	0.594666	0.0190362
KIT		0.871245	0.80309	-0.0681552				0.982312	0.924741	-0.0575707	0.610723	0.566727	-0.0439953	0.90897	0.883155	-0.0258147
KLF11					0.889562	0.837818	-0.0517444				0.616035	0.589715	-0.0263201	0.579865	0.559809	-0.0200557	0.0385527	0.0430137	0.00446098
KLF15					0.582116	0.539362	-0.0427538	0.588851	0.587365	-0.00148602	0.812663	0.772845	-0.0398184	0.198152	0.202835	0.0046834	0.0180053	0.0245324	0.00652711
KLHL15	up				0.877779	0.791058	-0.086721	0.160874	0.16457	0.00369634	0.894122	0.87864	-0.0154811	0.873455	0.84312	-0.0303341	0.283075	0.240955	-0.04212
KLHL5	up	0.0135545	0.00978505	-0.0037695	0.86612	0.82434	-0.0417793	0.626572	0.579809	-0.0467629	0.766716	0.716534	-0.0501821	0.200604	0.189737	-0.0108669
KRCC1	down	0.0267973	0.0197629	-0.00703436				0.258411	0.242572	-0.0158393	0.908418	0.871128	-0.0372907	0.339639	0.325533	-0.0141063	0.0451144	0.0506703	0.00555594
KRT10	down	0.82835	0.802856	-0.0254947							0.0441933	0.0466372	0.00244384	0.774667	0.78491	0.0102437
KRT12	up	0.920405	0.848713	-0.0716917	0.857567	0.812141	-0.0454261				0.916545	0.872229	-0.0443158	0.869755	0.794143	-0.0756121	0.93057	0.917736	-0.0128349
KRT15	down	0.804977	0.800509	-0.0044682				0.148338	0.133919	-0.0144185	0.916221	0.901401	-0.0148202	0.138649	0.151098	0.0124499	0.0491602	0.0639042	0.0147439
KRT19	down	0.0609303	0.0655989	0.00466852							0.107198	0.111705	0.00450657	0.245837	0.252303	0.00646642	0.0500924	0.049862	-0.00023035
KRT34	up	0.804023	0.763033	-0.0409902	0.134283	0.131526	-0.00275737				0.879788	0.802261	-0.077527	0.843172	0.822563	-0.0206082
KRT6A		0.762916	0.757888	-0.00502802	0.758526	0.747448	-0.0110786				0.787753	0.760829	-0.0269235	0.569061	0.567667	-0.00139364	0.672894	0.666551	-0.00634333
KRT75		0.875467	0.861294	-0.0141726	0.390326	0.38083	-0.00949603				0.918012	0.862926	-0.0550864	0.795083	0.745367	-0.0497151	0.711877	0.694129	-0.0177483
KRT80	up	0.0446886	0.0429606	-0.00172803	0.856963	0.869543	0.0125806				0.595794	0.586068	-0.00972643	0.536302	0.540597	0.00429507	0.0410961	0.0419108	0.000814779
KRT81		0.901492	0.863203	-0.0382891	0.903903	0.889466	-0.0144366				0.797219	0.76717	-0.0300488	0.776668	0.751197	-0.0254708	0.904744	0.902882	-0.00186197
L1CAM	up	0.0253842	0.0312578	0.00587364	0.647843	0.646595	-0.00124797				0.554195	0.547173	-0.00702202	0.809186	0.797261	-0.0119249	0.274818	0.271407	-0.00341166
LAMA3	up	0.174162	0.168297	-0.00586499							0.65507	0.613193	-0.0418768	0.189888	0.172106	-0.0177817	0.052167	0.0510218	-0.00114523
LAMB3	up	0.102701	0.0994827	-0.00321818	0.786212	0.80009	0.0138777	0.087321	0.0797217	-0.00759935	0.685814	0.65213	-0.033684	0.181941	0.180193	-0.00174834	0.200523	0.18828	-0.0122425
LAMC2	up	0.064069	0.0592332	-0.00483575	0.938215	0.932846	-0.00536907				0.479205	0.452759	-0.0264462	0.822339	0.795597	-0.026742	0.323408	0.317456	-0.00595266
LAMP3	up				0.432863	0.412902	-0.0199611	0.011315	0.00697954	-0.00433547	0.509575	0.493257	-0.0163187	0.869253	0.769929	-0.0993238	0.193453	0.200639	0.00718588
LATS2	up				0.913071	0.828896	-0.0841756	0.311916	0.297493	-0.0144224	0.871793	0.82351	-0.0482823	0.371425	0.362003	-0.00942181	0.0439236	0.0469177	0.00299405
LENG9		0.1256	0.106984	-0.0186151										0.161569	0.158982	-0.00258633	0.0538398	0.0577814	0.00394165
LEPREL1	up				0.830696	0.825522	-0.00517437	0.658745	0.626125	-0.0326197	0.652723	0.609096	-0.043627	0.8939	0.824215	-0.0696853	0.887301	0.816907	-0.0703939
LETMD1		0.0633026	0.0676655	0.00436284	0.661157	0.64805	-0.0131075	0.104922	0.128178	0.0232561	0.425219	0.418582	-0.00663751	0.282033	0.280865	-0.00116765	0.0413307	0.0392853	-0.00204538
LGALS12		0.544212	0.523678	-0.0205336	0.772493	0.791889	0.0193962	0.538432	0.544156	0.00572333	0.85893	0.831716	-0.0272135	0.752438	0.754727	0.00228929	0.729954	0.712541	-0.0174125
LGALS3		0.0179258	0.0114747	-0.00645112				0.205438	0.195703	-0.00973497	0.252349	0.230874	-0.021475	0.473451	0.472387	-0.00106369	0.31256	0.277573	-0.0349867
LHPP	down	0.00516321	0.00479695	-0.000366259	0.844398	0.829583	-0.0148149				0.809841	0.784562	-0.0252789	0.714225	0.697967	-0.0162588	0.0512938	0.0508785	-0.000415358
LIMA1	up				0.833118	0.72958	-0.103537	0.145414	0.130669	-0.0147454	0.611678	0.569844	-0.0418335	0.595534	0.575819	-0.0197144	0.0707941	0.0730158	0.00222173
LIN28B	up	0.867716	0.830388	-0.0373287	0.887792	0.810979	-0.0768126				0.837402	0.796606	-0.0407953	0.677019	0.628825	-0.0481946	0.717056	0.696594	-0.0204626
LMNB1	down	0.104052	0.100705	-0.00334715	0.912747	0.78087	-0.131877				0.370765	0.347108	-0.0236573	0.0587457	0.0624124	0.00366663	0.0512049	0.0405958	-0.010609
LMO4	down	0.0582711	0.0647256	0.00645447	0.921922	0.829649	-0.0922732	0.0697022	0.070447	0.000744766	0.328465	0.313552	-0.0149131	0.561528	0.536038	-0.0254897	0.0615318	0.0554486	-0.00608319
LOC100128288	down										0.885652	0.829039	-0.0566124	0.743126	0.72051	-0.022616	0.92348	0.885891	-0.0375884
LOC100130691											0.295636	0.289596	-0.00604053	0.0566042	0.0692565	0.0126523	0.012759	0.0124681	-0.000290845
LOC100268168	up										0.0935814	0.0914764	-0.00210506
LOC145783											0.185131	0.14449	-0.0406414
LOC283070	down										0.842987	0.810517	-0.03247	0.877985	0.849516	-0.0284684	0.879364	0.857367	-0.0219969
LOC374443											0.0415923	0.0468703	0.00527797	0.330314	0.313539	-0.0167751	0.0689894	0.0667998	-0.00218967
LOC647859											0.901945	0.81219	-0.0897548
LOC650368	up										0.41246	0.417257	0.00479707				0.913948	0.897032	-0.0169164
LOC728554	up										0.286992	0.277528	-0.009464
LOC730101	up										0.580671	0.538917	-0.0417544	0.0409828	0.0448653	0.00388255	0.0513118	0.0486682	-0.00264363
LONP1	down				0.157093	0.153737	-0.0033564				0.798072	0.764489	-0.0335821
LONRF3	up	0.0802007	0.0737141	-0.00648659	0.886386	0.857773	-0.028613				0.157552	0.154093	-0.00345898	0.406259	0.402375	-0.00388388	0.0444648	0.0494194	0.00495466
LOX		0.0756156	0.0761934	0.000577786	0.824643	0.796945	-0.0276974	0.112337	0.116385	0.00404768	0.262481	0.250494	-0.0119866	0.218199	0.214418	-0.00378128	0.0624425	0.064474	0.0020315
LPAR1	up	0.00262488	0.00163107	-0.000993813	0.787169	0.704254	-0.082915	0.416667	0.378087	-0.03858	0.789441	0.736642	-0.0528	0.884584	0.80662	-0.0779638
LPCAT2		0.051664	0.0486261	-0.0030379	0.890762	0.831763	-0.0589987				0.561904	0.517978	-0.0439255	0.912538	0.836275	-0.0762629	0.715308	0.684029	-0.0312795
LPCAT3	down	0.0737969	0.0799816	0.00618471	0.886703	0.830093	-0.0566095				0.633143	0.613688	-0.0194558	0.0390117	0.0432445	0.00423279	0.0447397	0.0463207	0.00158102
LRBA	down	0.0802914	0.0800273	-0.000264107	0.826159	0.762607	-0.0635523	0.0812639	0.0832655	0.00200168	0.855234	0.799902	-0.0553323	0.0580389	0.060863	0.00282407	0.0516	0.0409871	-0.0106129
LRCH2	up	0.884783	0.882361	-0.0024222							0.747621	0.735842	-0.0117796	0.770931	0.720317	-0.0506141	0.775952	0.747362	-0.0285905
LRIG1	down	0.0859266	0.0831974	-0.00272924	0.82941	0.767733	-0.0616771				0.770967	0.726418	-0.044549	0.0454691	0.0437035	-0.00176563	0.0334019	0.0390667	0.00566484
LRP5	down				0.875032	0.85335	-0.0216821				0.727901	0.694988	-0.032913	0.536111	0.549638	0.0135275
LRRC49	up	0.071627	0.0650737	-0.00655328	0.853989	0.812811	-0.0411783	0.0460233	0.0537428	0.00771946	0.687865	0.644365	-0.0434999	0.0752724	0.0775437	0.00227127	0.0552187	0.0538261	-0.00139265
LRRC6											0.272836	0.265949	-0.00688691	0.152317	0.138918	-0.0133984	0.23517	0.197838	-0.0373314
LRRN4					0.939363	0.890855	-0.0485085	0.702839	0.69102	-0.011819	0.857598	0.818639	-0.038959	0.474375	0.453835	-0.0205401	0.0765513	0.0706864	-0.00586484
LRRTM2											0.379116	0.358915	-0.020201
LSM3		0.0461941	0.0434505	-0.00274361	0.723678	0.659547	-0.0641309				0.563541	0.524366	-0.0391755	0.312548	0.291635	-0.020913
LSR		0.0487196	0.0467339	-0.00198564							0.351577	0.348964	-0.002613	0.0540015	0.0531801	-0.000821316	0.0489994	0.0473678	-0.0016316
LTBP1	down	0.0963694	0.0910894	-0.00528							0.711625	0.672465	-0.0391596	0.0458351	0.049151	0.00331591	0.0615005	0.0680109	0.00651041
LUM	up	0.731258	0.715305	-0.0159531							0.827474	0.755393	-0.0720811
LUZP4		0.925356	0.876167	-0.0491884	0.91462	0.872767	-0.0418531				0.927069	0.89391	-0.0331599	0.754478	0.739128	-0.0153503	0.900396	0.859348	-0.0410479
LXN	down	0.0371977	0.0379623	0.000764562										0.368585	0.371976	0.00339109	0.0671761	0.0634638	-0.0037123
LY6K	up	0.0780009	0.0818614	0.0038605	0.935846	0.885198	-0.0506489				0.854261	0.825772	-0.0284886	0.61206	0.580533	-0.0315266	0.0521385	0.0547595	0.00262099
LYAR	up	0.0476924	0.0512166	0.00352416				0.277148	0.267904	-0.00924417	0.729625	0.713752	-0.0158731
LYPD1	up	0.0718836	0.0670532	-0.00483041				0.682028	0.659597	-0.0224318	0.867751	0.831399	-0.0363519	0.39338	0.355939	-0.0374412	0.0412795	0.0467396	0.00546007
LYPD5	up	0.852575	0.84178	-0.0107955	0.909777	0.885332	-0.0244448	0.746251	0.735979	-0.010272	0.282933	0.281367	-0.00156578	0.786971	0.745271	-0.0416998	0.803746	0.760055	-0.0436916
MAEL	up							0.944553	0.808926	-0.135627	0.692673	0.652283	-0.04039	0.712547	0.698845	-0.0137016	0.871046	0.815452	-0.0555934
MAGEB10					0.085922	0.0611503	-0.0247717	0.422515	0.385885	-0.0366304	0.0710572	0.0733432	0.00228606	0.252653	0.250172	-0.0024812	0.198523	0.187653	-0.0108705
MAGEB2	up	0.496501	0.460737	-0.0357644							0.320405	0.265423	-0.0549819	0.274542	0.253712	-0.0208305	0.549054	0.51367	-0.0353845
MAGI3	down	0.0245644	0.0251846	0.000620153	0.723083	0.644529	-0.0785538				0.541674	0.501899	-0.0397749	0.0662887	0.06399	-0.00229875	0.0657006	0.0706489	0.00494831
MAL2		0.0538855	0.0569521	0.00306656	0.858897	0.788785	-0.0701123				0.377134	0.353498	-0.0236363	0.351215	0.328514	-0.022701	0.0165632	0.0121211	-0.00444211
MANSC1	down	0.120747	0.117176	-0.00357103				0.0647331	0.0699931	0.00526001	0.429247	0.385233	-0.0440143	0.079214	0.0773505	-0.00186352	0.0371025	0.0403371	0.00323459
MAOA	up	0.862785	0.788579	-0.0742063							0.740653	0.718097	-0.0225564	0.570021	0.559682	-0.0103391	0.884332	0.860337	-0.023995
MAP2K6	down	0.327062	0.31657	-0.010492	0.78032	0.762821	-0.0174993				0.679149	0.646163	-0.0329865	0.50251	0.482942	-0.019568	0.0823097	0.080467	-0.0018427
MAP3K2	up										0.901088	0.818361	-0.0827272	0.836889	0.798559	-0.0383295
MAP3K8		0.0599179	0.0525257	-0.00739221				0.0668727	0.0636099	-0.0032628	0.820311	0.750672	-0.069639	0.0637829	0.0673757	0.00359283	0.0376144	0.0365271	-0.00108734
MAP7					0.840521	0.780653	-0.0598679	0.0245633	0.0219302	-0.00263309	0.767216	0.72313	-0.0440865	0.136761	0.137534	0.000773497	0.0423927	0.0404553	-0.00193736
MAP7D2	up				0.84344	0.841227	-0.0022131				0.614287	0.59399	-0.0202963	0.878215	0.827452	-0.0507631	0.612344	0.545219	-0.0671247
MAP9	up				0.880079	0.798984	-0.081095	0.0306141	0.0321086	0.0014945	0.90224	0.83053	-0.0717103	0.322967	0.287882	-0.0350855	0.109401	0.11149	0.00208841
MARCKS		0.0627834	0.059236	-0.00354735	0.46487	0.402951	-0.0619199				0.0747525	0.0769979	0.0022454	0.0481893	0.0443864	-0.00380291	0.0433304	0.0445972	0.00126683
MARS		0.0198427	0.0193984	-0.000444325							0.649844	0.623378	-0.0264654	0.787791	0.7578	-0.0299902	0.0679626	0.0704407	0.00247807
MARVELD2								0.0531402	0.0582599	0.00511967	0.931891	0.89408	-0.0378118				0.0518025	0.0534146	0.00161213
MBD5	down	0.866512	0.796931	-0.0695812	0.905067	0.846074	-0.0589922				0.230048	0.233432	0.003384	0.813825	0.714428	-0.0993972	0.863009	0.768848	-0.0941619
MBNL3	down	0.00319633	0.00585029	0.00265397	0.798933	0.735826	-0.0631076	0.382977	0.355686	-0.0272912	0.82872	0.768212	-0.060508	0.447066	0.421133	-0.0259331	0.0811018	0.076138	-0.00496374
MBOAT2					0.816077	0.794388	-0.0216892	0.0800432	0.0876022	0.00755902	0.535445	0.51968	-0.0157652	0.062698	0.0622962	-0.000401768	0.16258	0.168833	0.00625242
MBOAT7					0.641142	0.619687	-0.0214553	0.0210808	0.0216977	0.000616912	0.829032	0.802655	-0.0263773	0.0456914	0.045468	-0.000223391	0.0288014	0.0283366	-0.000464755
MCAM	up	0.0773518	0.0614711	-0.0158807	0.885867	0.842082	-0.0437854				0.530893	0.514491	-0.0164029	0.553612	0.548669	-0.00494328	0.0831865	0.0824267	-0.000759843
MCL1		0.066525	0.0655683	-0.000956718	0.517751	0.48508	-0.0326718				0.0430952	0.0431496	5.4385e-05	0.298811	0.291477	-0.00733402	0.0208925	0.0249697	0.00407715
MCM10					0.889213	0.821907	-0.0673058	0.0838348	0.0836318	-0.000203055	0.715711	0.667123	-0.0485882	0.132065	0.126222	-0.00584288	0.0445193	0.0491965	0.00467714
MCM3		0.0399095	0.0382074	-0.0017021	0.118997	0.121075	0.0020779				0.857452	0.817935	-0.039517	0.313619	0.283669	-0.0299494	0.0498525	0.0483359	-0.00151657
MCM4		0.0231575	0.0255787	0.00242114	0.710621	0.680909	-0.0297121				0.241127	0.236212	-0.00491454	0.0486567	0.0478852	-0.000771472	0.0302919	0.025321	-0.00497087
MCM6	down	0.00401734	0.00640862	0.00239127							0.399497	0.377144	-0.0223529	0.451715	0.424427	-0.0272885	0.0393995	0.0379889	-0.00141057
MDGA2					0.760184	0.698491	-0.0616932	0.72095	0.672395	-0.0485547	0.515951	0.505518	-0.0104326	0.853904	0.823438	-0.0304667
MDM4		0.112838	0.10025	-0.0125876	0.867854	0.804005	-0.0638488				0.442869	0.428477	-0.014392	0.588355	0.573102	-0.0152533	0.0670264	0.0659897	-0.00103668
ME3					0.708446	0.716282	0.00783583	0.470926	0.47973	0.00880419	0.590132	0.567016	-0.0231159	0.878407	0.843274	-0.0351329	0.769444	0.727108	-0.0423359
MEGF9					0.850843	0.811196	-0.0396474				0.43119	0.397563	-0.0336273	0.386714	0.373873	-0.0128411	0.0864367	0.0926339	0.00619716
MET	up	0.0787802	0.0812888	0.00250855	0.869003	0.80931	-0.0596934	0.42946	0.406575	-0.0228848	0.649984	0.612717	-0.0372663	0.0740487	0.0718262	-0.00222252	0.0117105	0.0097681	-0.00194241
METTL7A	down	0.124132	0.116363	-0.00776863				0.0461289	0.0516137	0.00548479	0.84778	0.798296	-0.049484	0.460467	0.449603	-0.0108643	0.049734	0.0517267	0.00199275
MFAP2								0.858053	0.840583	-0.0174708	0.747467	0.732292	-0.0151749	0.786293	0.732861	-0.0534322
MFGE8		0.0530615	0.0490142	-0.00404735	0.893885	0.818526	-0.0753584				0.638911	0.621782	-0.0171293	0.451574	0.430716	-0.020858	0.0386042	0.035082	-0.00352219
MGP		0.0692561	0.0701092	0.00085318							0.0662659	0.0650273	-0.00123858	0.0480972	0.0406266	-0.00747061	0.0433458	0.0205465	-0.0227993
MGST2	down	0.0577787	0.0577994	2.06639e-05							0.651926	0.59471	-0.0572152	0.802288	0.767856	-0.0344319	0.080679	0.0614716	-0.0192074
MIA2	up							0.9093	0.825594	-0.083706	0.797067	0.798557	0.00148953	0.917319	0.88834	-0.0289784	0.813995	0.773796	-0.0401993
MICA	up	0.0349208	0.0330448	-0.00187603	0.315757	0.307538	-0.00821897				0.523723	0.508488	-0.0152355	0.234914	0.237268	0.00235344	0.0648847	0.064982	9.7268e-05
MICB	up	0.0582232	0.0575864	-0.000636748	0.698556	0.691612	-0.00694376	0.0415654	0.0401533	-0.00141214	0.676948	0.66393	-0.013018	0.292423	0.28137	-0.0110527	0.139222	0.145409	0.00618679
MIF4GD					0.841786	0.821428	-0.0203581	0.0702067	0.069111	-0.00109568	0.213656	0.214834	0.00117783	0.411463	0.408051	-0.00341137	0.0133522	0.0136437	0.000291499
MIR1292														0.0300834	0.0260915	-0.00399185
MIR181B1	down										0.892144	0.849049	-0.0430949				0.893246	0.840812	-0.0524338
MIR30C2	up													0.738363	0.610001	-0.128362	0.88649	0.835553	-0.0509363
MIR614	up													0.869244	0.818211	-0.0510327	0.773232	0.751579	-0.0216532
MITF	up	0.472515	0.437906	-0.0346081	0.879641	0.877977	-0.00166463				0.651535	0.613302	-0.0382329	0.482125	0.436563	-0.0455623	0.471735	0.423341	-0.0483944
MKL2	down				0.9043	0.892319	-0.0119805	0.595645	0.56324	-0.0324051	0.741189	0.683391	-0.0577985	0.103774	0.112906	0.00913201	0.0207601	0.0225022	0.00174207
MKNK1											0.738983	0.706906	-0.0320775	0.277635	0.264823	-0.0128114	0.0109679	0.0142474	0.00327953
MKX		0.428127	0.406345	-0.0217822				0.587967	0.566518	-0.0214482	0.49233	0.48444	-0.00789012	0.72591	0.700354	-0.025556	0.460712	0.468904	0.00819138
MLLT11	up				0.392681	0.422925	0.0302439	0.435627	0.425737	-0.0098892	0.900326	0.870613	-0.0297137
MMAB	down	0.0362562	0.0329733	-0.00328293	0.840953	0.798425	-0.0425278				0.848769	0.78437	-0.0643996				0.0525554	0.049496	-0.00305936
MMP1											0.0806839	0.0784206	-0.00226334	0.273534	0.253666	-0.0198687	0.20668	0.198878	-0.00780273
MMP13		0.0774127	0.0774447	3.19933e-05	0.039303	0.0360523	-0.00325076				0.246389	0.24961	0.00322113	0.0569417	0.0529251	-0.00401666	0.208254	0.210744	0.00249054
MMP3	down	0.0803551	0.088626	0.00827094	0.0744191	0.0705409	-0.00387826				0.133957	0.122792	-0.0111654	0.0592227	0.0557468	-0.00347593	0.0697414	0.0622617	-0.00747974
MMP8					0.0411334	0.0350038	-0.00612958				0.589636	0.578544	-0.011092
MOCOS											0.584945	0.578008	-0.00693716	0.464634	0.443591	-0.0210427	0.0510944	0.0474616	-0.00363279
MOSPD1	up				0.878772	0.856074	-0.0226983	0.187164	0.188122	0.000957909	0.892984	0.850305	-0.042679	0.578019	0.549412	-0.0286071	0.075559	0.0811975	0.0056385
MRPS12					0.801064	0.792617	-0.00844658	0.0600475	0.0686909	0.00864345	0.464132	0.454914	-0.0092183	0.103305	0.0991751	-0.00412975	0.0221667	0.0222995	0.000132808
MSH2		0.0369411	0.0368301	-0.000111047				0.0433074	0.0446439	0.00133651	0.301856	0.294501	-0.0073545	0.061556	0.0653708	0.00381476	0.0510234	0.0510126	-1.0855e-05
MSH4		0.932554	0.853518	-0.0790359							0.775841	0.709475	-0.0663659	0.805244	0.718783	-0.0864608	0.886068	0.822615	-0.0634533
MSH6		0.0116997	0.0106141	-0.00108555							0.585763	0.547327	-0.0384367	0.102389	0.0968468	-0.0055418	0.0384005	0.0377607	-0.000639718
MT1A		0.926076	0.899357	-0.0267184							0.746897	0.717511	-0.0293858	0.922018	0.872335	-0.0496829	0.930404	0.882675	-0.0477287
MT1F	down	0.614213	0.605238	-0.00897547							0.385322	0.385019	-0.000302889	0.0529179	0.0639118	0.0109939	0.0619691	0.0627861	0.000817017
MT1G		0.938027	0.918499	-0.0195278							0.844211	0.824054	-0.0201573	0.707323	0.70474	-0.00258322	0.914846	0.851326	-0.0635196
MT1L											0.881107	0.853753	-0.0273534	0.827864	0.808397	-0.0194668	0.901416	0.864884	-0.036533
MTHFD1L		0.0666328	0.0720059	0.0053731	0.908231	0.838845	-0.0693865				0.740609	0.701507	-0.0391024	0.54317	0.536918	-0.0062525	0.0631899	0.0605305	-0.00265943
MTHFD2											0.15335	0.145418	-0.00793198	0.810104	0.76873	-0.0413742	0.0534927	0.0442752	-0.00921749
MTMR7					0.86251	0.740217	-0.122293	0.738617	0.645767	-0.0928503	0.831406	0.787487	-0.0439188	0.928299	0.889675	-0.038624	0.891093	0.854317	-0.0367756
MUC1	down				0.808492	0.79419	-0.0143027				0.853896	0.832643	-0.0212533	0.0870297	0.0913591	0.00432943	0.0999065	0.0990535	-0.000852951
MUC13					0.219284	0.238339	0.0190557				0.314121	0.328421	0.0143	0.794323	0.809517	0.0151942	0.847201	0.830783	-0.016418
MUC15	down	0.0772773	0.0776067	0.00032937	0.86977	0.784673	-0.0850968	0.125659	0.112971	-0.0126883				0.066597	0.0651826	-0.00141442	0.0399025	0.0409327	0.0010302
MXD1		0.0577964	0.0618129	0.00401648	0.915681	0.879638	-0.0360431				0.627089	0.605604	-0.0214852	0.0729443	0.0753281	0.00238387	0.0387265	0.0386723	-5.4155e-05
MYB	down				0.862134	0.778663	-0.0834704	0.0235646	0.025978	0.00241341	0.288337	0.277688	-0.0106489	0.0403658	0.0424808	0.00211501	0.0898289	0.0933117	0.00348277
MYBL1	up				0.9087	0.903294	-0.00540567	0.0593496	0.0584099	-0.000939715	0.846533	0.771589	-0.0749436	0.04095	0.0439516	0.00300162	0.0473736	0.0437291	-0.00364451
MYEF2		0.781342	0.787084	0.00574153				0.796769	0.806107	0.00933853	0.257411	0.246843	-0.0105679	0.474447	0.461872	-0.0125748	0.370874	0.383431	0.0125567
MYH14	down				0.906534	0.882592	-0.0239416	0.414174	0.405876	-0.00829805	0.815065	0.774719	-0.040346	0.898537	0.869429	-0.0291076	0.774062	0.754435	-0.0196273
MYH3	up							0.61695	0.62557	0.00862017	0.682427	0.669728	-0.0126994	0.828727	0.819868	-0.00885888	0.903891	0.884381	-0.0195104
MYLK4	down	0.800822	0.723482	-0.0773391	0.806897	0.772309	-0.0345882	0.776834	0.716219	-0.0606142	0.840928	0.791456	-0.0494718	0.787454	0.764824	-0.0226293	0.813067	0.771198	-0.0418692
NAA11		0.241452	0.215064	-0.0263882	0.207387	0.1998	-0.00758763							0.246726	0.253498	0.0067715	0.47664	0.442133	-0.0345068
NAA38		0.0636137	0.0622717	-0.00134193	0.609678	0.614135	0.00445627				0.033318	0.0340423	0.000724302	0.0250154	0.0332848	0.00826933	0.0290836	0.0279733	-0.00111027
NAALADL2	down										0.730295	0.691443	-0.038852
NALCN					0.0464668	0.0566008	0.0101341	0.563293	0.54281	-0.0204823	0.198606	0.182696	-0.0159101	0.153468	0.140925	-0.0125435	0.437043	0.399981	-0.037062
NAV3		0.0683891	0.110046	0.041657	0.0565883	0.0894028	0.0328145				0.0713309	0.0687952	-0.00253569	0.0477555	0.0488872	0.00113166
NBR1					0.10849	0.100357	-0.00813314	0.103538	0.0977903	-0.0057476	0.897152	0.834875	-0.0622772	0.0474913	0.0487289	0.0012376
NCAM2								0.507458	0.487894	-0.0195638	0.16238	0.160083	-0.0022966	0.566034	0.564997	-0.00103631	0.524515	0.504541	-0.0199739
NCAPG					0.89472	0.788375	-0.106345	0.0308229	0.0288285	-0.00199438	0.0918291	0.0738685	-0.0179606	0.0731903	0.0636346	-0.00955573	0.0137701	0.0132236	-0.000546521
NCKAP5	down	0.883988	0.821563	-0.062425				0.727415	0.686293	-0.0411217	0.657617	0.64263	-0.0149869	0.787378	0.737032	-0.0503458	0.8395	0.792972	-0.0465275
NCOA7	up							0.282088	0.277266	-0.00482172	0.21883	0.214998	-0.00383159	0.452401	0.400224	-0.0521771
NDE1		0.048759	0.057648	0.00888901	0.90841	0.8735	-0.0349095	0.275824	0.261322	-0.0145014	0.629275	0.600322	-0.0289528	0.0794261	0.0811869	0.00176074	0.0400681	0.0496197	0.00955156
NDRG3	down				0.794926	0.767861	-0.0270646	0.417075	0.409782	-0.00729307	0.839103	0.836014	-0.00308963	0.27919	0.27362	-0.00556996	0.0517111	0.0556547	0.00394357
NDUFA2		0.0575549	0.0608435	0.00328864							0.0323971	0.0280734	-0.00432376				0.0521826	0.0559069	0.00372435
NDUFB3								0.284876	0.269225	-0.0156509				0.0611307	0.0622981	0.00116736	0.0509361	0.0518478	0.00091171
NEAT1	down										0.0620615	0.06194	-0.000121561	0.0764221	0.0752364	-0.00118566	0.0683653	0.0650812	-0.0032841
NEIL3		0.0677926	0.0674659	-0.000326727	0.930003	0.871101	-0.0589011	0.0710037	0.0686094	-0.00239429	0.703304	0.661643	-0.0416602	0.301145	0.258221	-0.0429241	0.0486148	0.047179	-0.00143589
NEO1	up				0.127406	0.107503	-0.0199029				0.240313	0.238214	-0.00209872	0.211106	0.167419	-0.0436872	0.088437	0.0814345	-0.00700254
NETO2	up				0.894982	0.875773	-0.0192097	0.0309361	0.041983	0.0110469	0.267295	0.258554	-0.00874162	0.164315	0.156656	-0.00765846	0.00806004	0.00719877	-0.00086127
NEXN	up				0.782911	0.732552	-0.0503593	0.192287	0.186393	-0.0058946	0.913911	0.886637	-0.0272731	0.929834	0.8668	-0.0630335	0.810225	0.762611	-0.0476138
NFE2L1					0.625386	0.623198	-0.00218827	0.0486459	0.0538138	0.00516794	0.729012	0.709475	-0.0195374	0.879684	0.85819	-0.0214937	0.057254	0.0668449	0.00959081
NFIA	down	0.0696451	0.0681412	-0.00150389	0.890477	0.825223	-0.0652537				0.417061	0.393482	-0.0235787	0.0945993	0.0907546	-0.00384478	0.0411545	0.0384287	-0.00272579
NFKB1					0.890541	0.817251	-0.0732905	0.0854695	0.0754371	-0.0100324	0.863109	0.79677	-0.0663391	0.254328	0.247915	-0.00641349	0.0841818	0.0941115	0.0099297
NFKBIE		0.0952737	0.0976732	0.00239949							0.736835	0.693437	-0.0433986	0.822212	0.781939	-0.0402724
NFKBIZ	down	0.0667792	0.0605913	-0.00618792	0.67	0.617775	-0.0522249	0.180635	0.176501	-0.00413312	0.793035	0.750928	-0.0421062
NGF								0.555004	0.538383	-0.0166206	0.843544	0.81132	-0.0322234	0.798703	0.766876	-0.0318269	0.298432	0.285953	-0.0124794
NKAPL	up	0.829743	0.773189	-0.0565542				0.982327	0.928044	-0.0542828				0.644837	0.617653	-0.027184	0.90227	0.826127	-0.0761437
NLRP10	up	0.467105	0.45217	-0.0149348							0.664126	0.638458	-0.0256681	0.758242	0.714566	-0.0436757	0.877855	0.843172	-0.0346833
NNAT	up	0.949965	0.860467	-0.089498				0.979068	0.901085	-0.0779832
NOC3L	up	0.0609111	0.0596296	-0.00128146							0.0635852	0.0448916	-0.0186936	0.0516471	0.0377559	-0.0138911
NOTCH3	down	0.0213071	0.0192016	-0.00210554	0.875103	0.86158	-0.0135234				0.707872	0.680714	-0.0271573	0.30903	0.295293	-0.0137375	0.0484814	0.0558935	0.00741209
NPFFR2		0.894979	0.872975	-0.0220037	0.906207	0.830847	-0.0753594				0.573741	0.541811	-0.0319302	0.734434	0.700896	-0.0335379
NPM3		0.0497856	0.0455901	-0.00419547	0.0807232	0.0820085	0.00128533				0.4444	0.433554	-0.0108462	0.428909	0.39455	-0.0343584	0.032582	0.0331208	0.000538813
NPNT	down	0.0459237	0.0435852	-0.00233847	0.883992	0.821286	-0.0627053				0.333203	0.319387	-0.0138154	0.0647415	0.0623075	-0.00243402	0.0551608	0.0577674	0.00260667
NPPC	up										0.11355	0.0918787	-0.0216708	0.845751	0.801224	-0.0445264	0.0776931	0.0837489	0.00605576
NPR3	down	0.462182	0.439515	-0.0226673	0.046012	0.0606424	0.0146303	0.00960862	0.00855542	-0.00105321	0.586802	0.564206	-0.0225953	0.0505541	0.0532511	0.00269701	0.057185	0.0565987	-0.000586307
NR1D1		0.0716015	0.078995	0.00739346	0.885041	0.88479	-0.000250533				0.413677	0.406898	-0.00677923	0.252885	0.252249	-0.000635593	0.0326608	0.0314491	-0.00121172
NR2F2	up							0.18447	0.188191	0.00372103	0.369946	0.351938	-0.0180082	0.180093	0.18392	0.0038273	0.061925	0.0630024	0.00107741
NRG1	down	0.752846	0.74356	-0.00928649	0.27546	0.293081	0.0176216	0.900372	0.869947	-0.0304253	0.171764	0.170493	-0.00127059	0.45337	0.436702	-0.0166677	0.816245	0.816859	0.000613867
NRIP3	up				0.914526	0.896695	-0.017831	0.0799623	0.0723663	-0.007596	0.441477	0.410891	-0.0305857	0.763521	0.737916	-0.0256049	0.929988	0.853189	-0.0767995
NRN1	down				0.520665	0.480219	-0.0404457	0.211864	0.204498	-0.00736616	0.470347	0.456298	-0.0140489	0.232967	0.23329	0.000322971	0.412755	0.419047	0.00629132
NRP1		0.0636141	0.0662882	0.00267415	0.852233	0.855685	0.00345277				0.699745	0.659327	-0.0404176	0.036581	0.0374413	0.000860294	0.0650174	0.0653631	0.00034576
NSDHL					0.88625	0.866935	-0.0193141	0.19266	0.186721	-0.00593893	0.461025	0.455337	-0.00568778	0.605328	0.576342	-0.0289856	0.0315665	0.0362708	0.00470433
NUAK1	up	0.187011	0.186383	-0.000628733	0.816777	0.79618	-0.0205972	0.230995	0.231992	0.000997281	0.701508	0.669021	-0.0324875	0.88171	0.834567	-0.0471436	0.929238	0.890461	-0.0387767
NUAK2	up	0.0752843	0.0761213	0.000836968	0.289311	0.271618	-0.017693				0.284361	0.270991	-0.0133708	0.861961	0.83485	-0.0271107	0.092308	0.0943185	0.00201049
NUCKS1	down				0.870831	0.835256	-0.0355756	0.0294613	0.0266821	-0.00277914	0.5176	0.500703	-0.0168975	0.513651	0.479431	-0.0342197	0.147262	0.138412	-0.00884988
NUDT3	down							0.0496643	0.0462436	-0.00342077	0.643763	0.611972	-0.0317915	0.379206	0.366468	-0.012738	0.0107885	0.00826556	-0.00252294
NUMB	down				0.850116	0.842581	-0.00753463	0.194584	0.179507	-0.0150778	0.872376	0.835541	-0.0368349	0.322787	0.307076	-0.0157109	0.0660639	0.0648131	-0.00125075
NUP62CL	up							0.375035	0.343669	-0.0313659	0.689948	0.690847	0.0008991
NUPR1	down	0.0454251	0.0386505	-0.00677462	0.610677	0.619875	0.0091982	0.0724584	0.060449	-0.0120093	0.315288	0.332922	0.0176339	0.833695	0.819672	-0.0140232	0.0887736	0.0950466	0.00627303
NXT2	up							0.871926	0.76671	-0.105215	0.0355343	0.0343225	-0.00121176	0.901671	0.799995	-0.101676	0.831203	0.744094	-0.0871085
NYNRIN	down	0.0447585	0.0427088	-0.00204968	0.818463	0.794537	-0.0239258				0.393019	0.379708	-0.0133108	0.841975	0.807163	-0.0348122	0.294735	0.306551	0.0118154
OCLN								0.229628	0.224286	-0.00534148	0.812474	0.797827	-0.0146464	0.168113	0.149212	-0.0189006	0.0550147	0.0529092	-0.00210554
ODC1	up				0.888118	0.863749	-0.0243693	0.0809717	0.0812436	0.000271941	0.823995	0.758928	-0.0650675	0.585257	0.544021	-0.0412354	0.0156988	0.0140877	-0.00161104
OIP5											0.0970372	0.0795622	-0.017475
OLFML3	up	0.302172	0.305452	0.0032808	0.868338	0.820945	-0.047393				0.859502	0.798415	-0.0610869	0.572542	0.535527	-0.0370154	0.751569	0.715268	-0.0363003
OLR1	up										0.7588	0.673063	-0.0857369	0.774784	0.704867	-0.0699172	0.665777	0.615654	-0.0501234
OMA1								0.159659	0.145879	-0.0137801	0.887634	0.818231	-0.0694024	0.474564	0.442811	-0.0317532	0.0866379	0.0882444	0.00160651
OPN3		0.0643493	0.0695192	0.0051699				0.0574551	0.055919	-0.00153604	0.292891	0.275913	-0.016978	0.655948	0.628511	-0.0274372	0.01392	0.0198534	0.00593334
ORAI3	down	0.0502542	0.0568375	0.00658334							0.0822334	0.0893233	0.00708994				0.0280778	0.0298461	0.00176829
OSBPL6								0.150719	0.140031	-0.0106884	0.0397412	0.0614994	0.0217581	0.205667	0.187126	-0.0185408	0.442512	0.441078	-0.00143351
OSR2	up							0.58834	0.556523	-0.0318161	0.878264	0.833289	-0.0449754	0.38455	0.376286	-0.00826462	0.0492346	0.0487106	-0.000523945
OTUD6A		0.475552	0.468628	-0.00692409										0.380728	0.379972	-0.000756576	0.386259	0.374219	-0.0120401
OXGR1	down				0.828155	0.805763	-0.0223921	0.588149	0.550113	-0.0380363	0.882743	0.814579	-0.0681637	0.153876	0.145611	-0.00826474	0.0480503	0.0480854	3.50439e-05
OXTR	up	0.248523	0.24089	-0.00763333				0.850564	0.834065	-0.0164992	0.858128	0.803777	-0.0543513	0.738096	0.713084	-0.0250117	0.354437	0.402973	0.048536
P2RY2	down	0.039121	0.0363627	-0.00275835	0.732303	0.736706	0.00440297	0.460492	0.449435	-0.0110575	0.833315	0.79779	-0.0355255	0.165388	0.163877	-0.00151051	0.0492406	0.049037	-0.000203532
PADI2	down	0.0477517	0.0511587	0.00340701	0.83794	0.81938	-0.0185607	0.00469542	0.0197122	0.0150168	0.243957	0.247656	0.00369899	0.416822	0.43228	0.0154582	0.0508938	0.052293	0.00139926
PADI3	up							0.803839	0.791321	-0.0125184	0.393949	0.401928	0.00797918	0.865835	0.845692	-0.0201429	0.522058	0.518281	-0.00377712
PAGE2B	up	0.864105	0.813517	-0.0505879				0.885682	0.878939	-0.00674257	0.751081	0.67246	-0.0786217	0.804022	0.764957	-0.0390651	0.886725	0.843397	-0.0433278
PAGE5	up							0.746678	0.720122	-0.0265565	0.567227	0.539736	-0.0274917	0.823196	0.751315	-0.0718817	0.778774	0.774265	-0.00450865
PALMD	down	0.0598029	0.0564566	-0.00334631							0.0469601	0.0527892	0.00582915	0.739792	0.720208	-0.0195844
PAN2	down	0.0409324	0.0350694	-0.00586296	0.160209	0.163517	0.00330726	0.219119	0.21436	-0.00475863	0.868432	0.834808	-0.0336235	0.212706	0.209333	-0.00337382
PAPSS2	up	0.0876209	0.0909736	0.00335272							0.618423	0.581012	-0.0374111	0.523562	0.487411	-0.0361507	0.0576781	0.0562117	-0.00146638
PARP8		0.118534	0.123912	0.00537828							0.160426	0.155135	-0.00529121	0.537305	0.510983	-0.0263227	0.137411	0.114938	-0.0224736
PAX7	down				0.869842	0.853152	-0.01669	0.00752041	0.00753199	1.15795e-05	0.803533	0.765398	-0.0381352	0.955717	0.895488	-0.0602295	0.153361	0.136999	-0.0163612
PBX1	down	0.175048	0.175489	0.000441348	0.869309	0.805185	-0.0641241				0.77627	0.727624	-0.0486466	0.0922859	0.097146	0.00486007	0.0650793	0.0590997	-0.00597955
PC	down				0.890004	0.859298	-0.0307063	0.681547	0.663661	-0.0178855	0.77427	0.74959	-0.0246796	0.231598	0.235625	0.0040267	0.0356236	0.0308251	-0.00479855
PCCA	down	0.0228896	0.0252738	0.00238426	0.940598	0.879205	-0.0613932				0.788817	0.74201	-0.0468065	0.0520358	0.0504478	-0.00158802	0.0389792	0.0445759	0.00559669
PCDH7	up	0.431736	0.393217	-0.0385192	0.742821	0.6612	-0.081621				0.558555	0.509544	-0.0490105	0.0692647	0.0683392	-0.000925537	0.0451852	0.0485785	0.00339328
PCDHB13	down	0.748853	0.69223	-0.0566226	0.782341	0.766597	-0.0157439							0.237951	0.235665	-0.0022864	0.160755	0.178539	0.0177833
PCDHB14	down	0.822084	0.748365	-0.0737192	0.888054	0.830289	-0.0577644							0.645294	0.628884	-0.0164099	0.704216	0.677208	-0.0270079
PCDHB4	down	0.833304	0.750433	-0.0828708										0.724774	0.649569	-0.0752055	0.847556	0.836462	-0.0110939
PCK2		0.0475969	0.0405349	-0.00706203							0.278601	0.272011	-0.00658984	0.477444	0.446099	-0.0313451	0.0515368	0.0558533	0.00431651
PCNA		0.0435013	0.0480906	0.00458937				0.842745	0.772774	-0.0699709	0.320635	0.298322	-0.0223128	0.0461565	0.050285	0.00412843	0.0421616	0.0396471	-0.0025145
PCYOX1		0.0578456	0.057943	9.74578e-05	0.910685	0.842902	-0.0677834				0.511996	0.500523	-0.0114727	0.185446	0.165665	-0.0197805	0.0379023	0.0355453	-0.00235701
PDE7B		0.140023	0.126764	-0.0132587	0.773014	0.764994	-0.00801985				0.301515	0.296675	-0.00484052	0.211291	0.21392	0.00262872	0.0552031	0.0581306	0.00292747
PDE9A	down				0.830228	0.769874	-0.0603547	0.0475826	0.0443542	-0.00322841	0.677304	0.64076	-0.0365444	0.71543	0.680444	-0.0349861
PDGFRL		0.0550997	0.0485288	-0.00657083	0.815237	0.771896	-0.0433407	0.100735	0.10333	0.00259436	0.41827	0.404182	-0.0140879	0.280603	0.265621	-0.0149811	0.0742047	0.0728112	-0.00139353
PDPN		0.134896	0.137043	0.00214683	0.111579	0.118245	0.00666613	0.0653156	0.0643229	-0.000992702	0.130774	0.145655	0.0148808	0.328079	0.321419	-0.00666031	0.226858	0.233284	0.00642556
PDSS2	down	0.035545	0.0349042	-0.000640817							0.673784	0.622567	-0.051217	0.184662	0.17663	-0.00803211	0.0315201	0.0307544	-0.000765742
PDZK1	up							0.892573	0.84248	-0.0500934	0.902066	0.883214	-0.0188521	0.735392	0.723109	-0.0122826	0.814775	0.804849	-0.0099266
PEA15	up				0.184709	0.168738	-0.015971	0.209859	0.197798	-0.012061	0.894853	0.879674	-0.0151787	0.790087	0.764157	-0.0259301
PEX11A	down										0.889066	0.854615	-0.0344505	0.244979	0.250978	0.00599873	0.048741	0.0516031	0.00286216
PEX11B	down										0.29152	0.290149	-0.00137157
PEX3					0.908366	0.870883	-0.0374828	0.0798466	0.0868132	0.00696657	0.755103	0.689203	-0.0658999
PGM2L1	up				0.885333	0.849995	-0.0353383	0.0756785	0.0723644	-0.00331409	0.510385	0.458032	-0.0523526	0.236567	0.225491	-0.0110756	0.0422675	0.0451423	0.00287481
PGM5	up				0.0644733	0.0587537	-0.00571958				0.0328298	0.0470654	0.0142355
PHF21A					0.802298	0.758939	-0.0433589	0.220405	0.206315	-0.0140899	0.808639	0.738661	-0.0699777	0.0811126	0.0829745	0.00186184	0.040281	0.0334073	-0.00687378
PHGDH	down	0.0554067	0.050286	-0.00512071	0.107311	0.099112	-0.00819907				0.200485	0.194955	-0.00553056	0.682697	0.668895	-0.0138019	0.0870243	0.080252	-0.00677228
PHKA1	down	0.222485	0.237272	0.0147872	0.627092	0.59083	-0.036262	0.399271	0.423046	0.023775	0.492392	0.462545	-0.0298476	0.082515	0.0836696	0.00115454	0.0611382	0.0611411	2.92833e-06
PHLDA1		0.0628247	0.0607868	-0.00203785	0.0605223	0.0598228	-0.000699473							0.0604246	0.0551889	-0.00523562	0.0530034	0.06372	0.0107166
PI3	down				0.854213	0.829277	-0.024936				0.834771	0.798857	-0.0359144	0.356669	0.326361	-0.0303082	0.14923	0.157999	0.00876883
PI4K2B		0.0711128	0.0702565	-0.000856352							0.488316	0.486101	-0.00221545	0.0519612	0.0518662	-9.50311e-05	0.0547541	0.0516129	-0.00314121
PID1					0.0668585	0.057614	-0.00924451	0.277832	0.24897	-0.0288616	0.068737	0.0712722	0.00253521	0.437627	0.41857	-0.0190573	0.360071	0.301136	-0.0589351
PIGU	down	0.115293	0.11052	-0.00477315	0.826783	0.813334	-0.0134495				0.626174	0.594622	-0.0315523	0.597076	0.544879	-0.0521964	0.0526177	0.0475874	-0.00503027
PIGW	up							0.0344001	0.0342858	-0.00011439	0.889058	0.820846	-0.0682117				0.00704487	0.00194323	-0.00510163
PIK3AP1	up				0.730294	0.719058	-0.011236				0.758283	0.733324	-0.024959	0.0926963	0.0870962	-0.00560011	0.0508593	0.0540669	0.00320754
PIK3CG	up				0.629328	0.5609	-0.068428	0.770148	0.748802	-0.0213456	0.911786	0.862284	-0.0495011	0.824871	0.751371	-0.0734998	0.895938	0.839886	-0.0560518
PIK3R1	down	0.897729	0.841282	-0.0564478	0.891782	0.811166	-0.0806164				0.163599	0.156024	-0.00757453	0.530372	0.454842	-0.0755302	0.677152	0.657544	-0.0196072
PIM1	up				0.814204	0.781545	-0.032659	0.0311052	0.0313847	0.000279478	0.0543339	0.0511345	-0.0031994	0.0766688	0.0757139	-0.000954977	0.0548695	0.0537413	-0.00112814
PITPNC1	down				0.672613	0.619563	-0.0530502	0.0442285	0.0450608	0.00083237	0.59035	0.567867	-0.0224831	0.213685	0.208404	-0.00528143	0.0407066	0.0379679	-0.00273871
PIWIL2	up				0.911348	0.870572	-0.0407756	0.917561	0.896676	-0.0208851	0.435088	0.427569	-0.00751901	0.35266	0.337243	-0.0154171	0.841876	0.827215	-0.0146613
PIWIL4		0.942206	0.886181	-0.0560256							0.582264	0.617943	0.0356796	0.842961	0.79159	-0.0513707
PKN3		0.0520999	0.0483706	-0.00372926							0.878325	0.854476	-0.0238486	0.784968	0.760004	-0.024964	0.0990642	0.103892	0.00482798
PKP2	up	0.317745	0.313163	-0.00458191	0.852355	0.807093	-0.0452626				0.719188	0.68808	-0.0311079	0.0678136	0.0743162	0.00650265
PLA2G7	up	0.000285972	0.00204474	0.00175876				0.065451	0.066958	0.00150706	0.877004	0.839222	-0.0377827	0.126145	0.125187	-0.000957665	0.0499599	0.0502978	0.000337833
PLAC8	up	0.789168	0.737967	-0.0512009	0.902554	0.88052	-0.0220343	0.267787	0.257425	-0.0103615	0.887547	0.841749	-0.045798	0.762595	0.761351	-0.00124417	0.853231	0.781312	-0.0719186
PLAGL1	up	0.437307	0.430738	-0.00656924	0.900805	0.833656	-0.0671484	0.522711	0.496057	-0.0266534	0.502361	0.516481	0.0141208	0.857119	0.79748	-0.059639	0.175281	0.176644	0.00136352
PLAT	up				0.932038	0.86142	-0.0706186	0.547006	0.510417	-0.0365891	0.802646	0.762445	-0.0402016	0.881856	0.864219	-0.0176374	0.163373	0.142215	-0.0211571
PLAUR	up							0.0309204	0.0338445	0.0029241	0.408526	0.396094	-0.0124317	0.0880684	0.0896718	0.00160338	0.0508229	0.0741742	0.0233513
PLCB4					0.531131	0.43058	-0.100551	0.184275	0.141475	-0.0428001	0.0884829	0.103534	0.0150509	0.139131	0.101782	-0.0373487
PLCG2	down				0.891	0.862331	-0.0286695	0.602311	0.576992	-0.0253183	0.881694	0.840471	-0.0412232	0.0736518	0.0662845	-0.00736739	0.0606124	0.0573969	-0.00321555
PLCH1	down				0.761054	0.70949	-0.0515644	0.335323	0.319122	-0.0162005	0.772131	0.728535	-0.0435957	0.131295	0.139627	0.00833261	0.752968	0.694871	-0.0580969
PLD1					0.910788	0.863246	-0.0475416	0.567319	0.53412	-0.0331986	0.829615	0.792528	-0.0370869	0.257497	0.249701	-0.00779542	0.0648519	0.0638886	-0.000963257
PLEK2	up				0.872768	0.798869	-0.0738986				0.568736	0.538868	-0.0298674	0.237361	0.228136	-0.00922436	0.0535031	0.058572	0.00506889
PLEKHA5		0.0352082	0.0264401	-0.00876814	0.724856	0.722604	-0.00225143	0.814321	0.790368	-0.0239534	0.576594	0.561213	-0.0153813	0.120811	0.127739	0.00692798
PLEKHB1	down				0.636724	0.619195	-0.0175288	0.672462	0.66776	-0.00470232	0.590888	0.58382	-0.00706801	0.635894	0.638776	0.0028819	0.680715	0.665291	-0.0154239
PLIN2								0.0109352	0.0149353	0.0040001	0.854783	0.836189	-0.0185939	0.489098	0.476803	-0.0122946
PLK3	up	0.000243057	0.00516881	0.00492575							0.642035	0.613176	-0.0288585	0.138361	0.136048	-0.00231302	0.03763	0.0352874	-0.00234257
PLLP	up				0.506992	0.527636	0.0206433				0.649067	0.630921	-0.0181457	0.101871	0.0963609	-0.00550989	0.0252892	0.0225752	-0.00271399
PLOD2								0.0555054	0.050489	-0.00501641	0.610382	0.565317	-0.0450643	0.339492	0.349751	0.010259	0.175982	0.181689	0.00570683
PLSCR4								0.0397444	0.0392332	-0.000511116				0.743002	0.709103	-0.0338991	0.0709847	0.0628286	-0.00815605
PLXDC2	down	0.0681249	0.0700996	0.0019747	0.838878	0.802233	-0.0366448				0.606663	0.594696	-0.0119666	0.073606	0.0617105	-0.0118955	0.212391	0.207852	-0.00453966
PMAIP1	up							0.071338	0.0693476	-0.00199046				0.747101	0.689202	-0.0578993	0.0457397	0.0424896	-0.00325001
PMP22		0.767462	0.721355	-0.0461071	0.638745	0.623142	-0.015603	0.107675	0.109782	0.00210626	0.455591	0.432965	-0.0226264	0.870088	0.876378	0.00628943	0.115147	0.108588	-0.00655963
PNLDC1	up				0.766878	0.728461	-0.0384175	0.936092	0.90596	-0.0301318	0.773264	0.757993	-0.0152708	0.923272	0.850846	-0.0724255	0.892296	0.846016	-0.0462804
PNRC1		0.0570437	0.0585671	0.00152334				0.0257615	0.0328548	0.0070933	0.354305	0.333319	-0.0209862	0.053527	0.0470647	-0.00646229	0.0724836	0.06954	-0.00294367
POLB	up	0.0508456	0.0529228	0.0020772							0.494099	0.467669	-0.0264299	0.0350476	0.0299	-0.00514761	0.0541774	0.0581501	0.00397267
POLE2											0.36972	0.361759	-0.00796039	0.680351	0.671753	-0.00859738	0.0789863	0.0764179	-0.00256839
POLN					0.822226	0.82341	0.00118443				0.748968	0.730532	-0.0184366
POLR2A					0.322117	0.317789	-0.00432847				0.89756	0.872716	-0.0248431	0.0506849	0.054629	0.00394414
POLR3F	up	0.0556687	0.0575565	0.00188776	0.860664	0.804708	-0.0559561				0.462751	0.439838	-0.0229136
PON3		0.984451	0.926401	-0.0580504							0.840118	0.77904	-0.0610778	0.847869	0.816074	-0.0317954	0.894275	0.834124	-0.0601516
POP1		0.0713767	0.0745175	0.00314074	0.900205	0.861029	-0.039176	0.0701937	0.0691673	-0.0010264	0.400935	0.303582	-0.0973526	0.0718212	0.068527	-0.00329418	0.0150913	0.0153262	0.000234951
POSTN		0.610243	0.542875	-0.0673677				0.27543	0.29382	0.0183898	0.434189	0.440142	0.0059526	0.568953	0.548809	-0.0201445	0.627013	0.62603	-0.0009834
POTEC								0.519287	0.492717	-0.0265697	0.86117	0.830555	-0.0306154	0.62467	0.592417	-0.0322532	0.728272	0.645963	-0.0823092
PPA2	down	0.0903178	0.0913432	0.00102533							0.331609	0.319103	-0.0125065	0.224408	0.213247	-0.0111614	0.0554431	0.0583764	0.00293335
PPARA	down				0.673644	0.676157	0.00251273	0.31334	0.296429	-0.0169113	0.947428	0.9284	-0.0190277	0.453625	0.447795	-0.00583003
PPM1K	up				0.886627	0.826894	-0.0597334	0.303452	0.282507	-0.0209446				0.296195	0.303712	0.00751642	0.0220312	0.0218894	-0.000141824
PPP1R15A	up							0.0330865	0.0354488	0.00236233	0.244469	0.252966	0.008497	0.8265	0.788621	-0.0378786	0.0475122	0.0447581	-0.00275413
PPP1R1C	up	0.816973	0.77145	-0.045523							0.723782	0.701517	-0.0222653	0.651662	0.655583	0.00392059	0.877468	0.900185	0.022717
PPP1R3C	down	0.393144	0.381836	-0.0113082	0.909597	0.811817	-0.0977809				0.729557	0.686178	-0.0433791	0.314497	0.29283	-0.0216667	0.324957	0.313951	-0.0110067
PRDM1	up				0.591048	0.564542	-0.0265056	0.0783937	0.0786658	0.000272158	0.622803	0.600319	-0.0224846	0.109332	0.106163	-0.00316951	0.0746104	0.0767302	0.00211977
PRKAG1		0.0198299	0.0213903	0.00156043	0.902184	0.845154	-0.0570295				0.451357	0.421984	-0.0293728				0.219371	0.235203	0.0158317
PRKAR1B					0.852229	0.832618	-0.0196107	0.631012	0.615954	-0.0150583	0.835357	0.814131	-0.0212265	0.745357	0.719254	-0.0261031	0.818676	0.806423	-0.0122533
PRKCA		0.0710143	0.0712484	0.000234062	0.731025	0.741757	0.0107313				0.730668	0.697248	-0.0334204	0.510737	0.493669	-0.0170678	0.0482361	0.0536829	0.00544678
PRL		0.839256	0.781069	-0.0581873	0.827583	0.716204	-0.111379				0.803903	0.782204	-0.0216989	0.902404	0.821957	-0.0804468
PROCR	up				0.624123	0.614503	-0.0096195	0.0895459	0.0809654	-0.00858044	0.910555	0.85526	-0.0552944	0.819377	0.771173	-0.0482032	0.11368	0.11016	-0.0035202
PROS1	up	0.0564301	0.0570541	0.000623967	0.729801	0.639902	-0.0898986				0.620599	0.588937	-0.031662	0.827351	0.756418	-0.0709324	0.102526	0.0982118	-0.00431444
PRR13								0.0533251	0.0501771	-0.00314806	0.906506	0.861746	-0.0447607	0.0408447	0.0466852	0.00584051	0.0748947	0.0660871	-0.00880764
PRR15	down	0.0579633	0.0507997	-0.00716365	0.877289	0.825376	-0.0519127	0.472351	0.451593	-0.0207577	0.890658	0.87834	-0.0123173	0.0501661	0.0441432	-0.00602285	0.063223	0.069085	0.00586202
PRR15L	down	0.145894	0.131006	-0.014888	0.15758	0.166617	0.00903677	0.119496	0.127084	0.0075881	0.736709	0.71622	-0.0204888	0.539965	0.536221	-0.00374466	0.069422	0.0628194	-0.00660264
PRR23A		0.714549	0.721113	0.00656448	0.878595	0.815061	-0.0635334							0.847367	0.784817	-0.0625501	0.94898	0.951056	0.00207616
PRR23C		0.819485	0.805078	-0.0144076	0.573838	0.60314	0.0293023							0.900369	0.849157	-0.0512127	0.752143	0.724965	-0.0271776
PRRG4					0.791359	0.702057	-0.0893023	0.0528271	0.0603263	0.0074992	0.901222	0.841268	-0.0599541	0.0554676	0.0582192	0.00275164	0.0167998	0.0168557	5.59237e-05
PRSS12	down	0.104372	0.0998088	-0.00456285				0.00918397	0.0149439	0.00575995	0.333788	0.326156	-0.00763175	0.24286	0.229783	-0.0130768	0.0279623	0.0297401	0.00177777
PRSS21											0.813681	0.786214	-0.0274671	0.664483	0.668651	0.004168	0.494524	0.480876	-0.0136484
PRTFDC1	up	0.63648	0.626943	-0.00953703	0.0865858	0.0718762	-0.0147097				0.80567	0.770942	-0.0347277	0.118379	0.127983	0.00960413
PSAT1		0.0885712	0.0854395	-0.00313168							0.38895	0.391065	0.00211501	0.0487343	0.0496267	0.000892402
PSCA					0.874415	0.847143	-0.0272724				0.784372	0.73509	-0.0492814	0.129465	0.131679	0.00221399	0.12878	0.129225	0.000445418
PSG9	up	0.430434	0.413122	-0.0173115							0.0476997	0.0628802	0.0151805	0.644886	0.628289	-0.0165968
PSTPIP2	up	0.00809943	0.00892012	0.000820695	0.423253	0.467822	0.0445687				0.590935	0.532845	-0.0580904	0.491567	0.471082	-0.0204849	0.0983874	0.0907456	-0.00764188
PTCHD1	down	0.0516549	0.0463368	-0.00531813	0.853343	0.828053	-0.02529				0.355881	0.340207	-0.0156743	0.302002	0.300203	-0.00179912	0.0506237	0.0527596	0.00213593
PTGER4	up	0.05476	0.0589923	0.00423223	0.867909	0.796633	-0.0712753	0.0761138	0.0747903	-0.00132351	0.35743	0.336861	-0.0205688	0.0303471	0.0296467	-0.000700392	0.0278514	0.0287932	0.000941767
PTGR1								0.0741087	0.0752654	0.00115677	0.883009	0.860986	-0.0220228	0.914218	0.860611	-0.0536068	0.597556	0.583216	-0.0143399
PTGS1								0.013939	0.0123815	-0.00155747	0.482824	0.467562	-0.0152628	0.776266	0.752462	-0.0238043	0.137851	0.132251	-0.00560003
PTGS2					0.135181	0.111593	-0.023588	0.769388	0.766074	-0.00331427	0.575737	0.538896	-0.036841	0.559119	0.541629	-0.01749	0.444116	0.450893	0.00677736
PTH2R	down	0.0467842	0.0500336	0.00324937							0.473202	0.458621	-0.0145803	0.275198	0.280531	0.00533353	0.0371606	0.037927	0.000766307
PTPN22	up				0.531256	0.555541	0.0242856	0.621501	0.596956	-0.0245444	0.846761	0.792879	-0.053882	0.811855	0.801027	-0.0108275	0.432736	0.359448	-0.0732875
PTPRF	down	0.0337714	0.0342036	0.000432201	0.840881	0.825109	-0.015772	0.282216	0.269853	-0.0123632	0.800061	0.770753	-0.0293081	0.832257	0.750557	-0.0817002	0.091745	0.107875	0.01613
PTPRG		0.0849327	0.0917099	0.00677725	0.851773	0.734896	-0.116877				0.781666	0.748657	-0.0330094	0.0484724	0.0487736	0.000301253	0.0578212	0.0533398	-0.00448145
PTPRH	up	0.632198	0.636759	0.0045614	0.123536	0.114046	-0.00948993				0.401301	0.39496	-0.00634103	0.394883	0.383803	-0.0110798
PTRF	up	0.0894122	0.0833873	-0.00602487	0.426392	0.417611	-0.0087817				0.455979	0.426597	-0.0293817	0.461558	0.453897	-0.0076615	0.0504783	0.0581872	0.00770898
PTX3								0.878679	0.851276	-0.0274037
PVR	up	0.0694092	0.0677046	-0.00170463	0.850286	0.834977	-0.0153095				0.266675	0.248942	-0.0177333	0.636021	0.602653	-0.0333679	0.128327	0.123702	-0.00462449
PVRL4	down				0.741866	0.65918	-0.0826859	0.0509222	0.0517265	0.000804287	0.651551	0.621828	-0.0297223	0.66418	0.639404	-0.0247756	0.06686	0.0679276	0.00106757
PXK		0.0365479	0.0326134	-0.00393457	0.901996	0.834402	-0.0675934				0.649856	0.619503	-0.030353	0.420796	0.412082	-0.00871391	0.0476826	0.0428142	-0.00486834
PYGL	up	0.0876132	0.0933076	0.00569438							0.740776	0.696988	-0.043788	0.0667895	0.062302	-0.0044875	0.0131327	0.014932	0.00179931
PYROXD1		0.117185	0.10735	-0.00983497							0.0475116	0.0452039	-0.00230775	0.431512	0.393361	-0.038151	0.0394442	0.0252452	-0.014199
R3HDM2	down	0.902909	0.82923	-0.0736796	0.909287	0.866352	-0.0429351				0.807724	0.76494	-0.0427838	0.798336	0.739733	-0.0586028	0.795504	0.739417	-0.0560862
RAB38		0.101766	0.102687	0.00092092	0.0646064	0.0613577	-0.00324872				0.0695616	0.0685316	-0.00102999	0.301916	0.285331	-0.0165845	0.403866	0.384528	-0.0193374
RAB39B		0.877132	0.843745	-0.0333869	0.85272	0.782693	-0.0700271	0.87922	0.834614	-0.0446057	0.892707	0.85926	-0.0334473				0.965189	0.914747	-0.0504419
RAB3B	up	0.10528	0.113095	0.00781472	0.728785	0.718906	-0.009879	0.629091	0.581925	-0.0471657	0.694991	0.671508	-0.0234825	0.475219	0.449758	-0.0254603	0.0557702	0.0574709	0.00170064
RAB3D	down							0.0282707	0.0280256	-0.000245102	0.972127	0.895574	-0.0765529	0.213862	0.22293	0.00906782	0.079894	0.0789918	-0.000902243
RAB3GAP1					0.969607	0.928552	-0.0410552				0.0514565	0.048439	-0.00301749	0.841576	0.817335	-0.0242415	0.0664417	0.0638082	-0.00263352
RAB8B	up	0.0314583	0.0299866	-0.00147168	0.890202	0.848703	-0.0414986				0.543957	0.507034	-0.0369231	0.046792	0.0513289	0.00453684	0.0179603	0.0214016	0.00344132
RAD54L		0.0247187	0.0275377	0.00281899							0.765864	0.724201	-0.0416631	0.192155	0.195146	0.00299024	0.0594979	0.0653577	0.00585979
RALGAPA2	down	0.0880548	0.0978889	0.00983406	0.932403	0.902191	-0.0302126	0.10157	0.105721	0.00415082	0.767478	0.689958	-0.0775201	0.0601418	0.0613765	0.00123471	0.016998	0.0167411	-0.000256882
RALGPS1	down				0.852775	0.842038	-0.0107365	0.413528	0.39897	-0.0145584	0.825727	0.793598	-0.032129	0.11619	0.10897	-0.00721964	0.0890983	0.0849049	-0.00419346
RALGPS2					0.925645	0.823605	-0.10204	0.287345	0.259547	-0.0277979	0.912194	0.84885	-0.0633443	0.37677	0.364934	-0.0118358	0.021663	0.0137153	-0.0079477
RARRES1	down	0.0453423	0.045946	0.000603707				0.0129089	0.0137501	0.000841161	0.340698	0.316458	-0.0242399	0.0575771	0.0557835	-0.00179358
RASA1		0.0688653	0.0664245	-0.00244082	0.913304	0.840823	-0.0724811				0.849835	0.802035	-0.0478001	0.16128	0.16984	0.0085597	0.0544472	0.0586257	0.00417855
RASGRF2		0.902749	0.837529	-0.0652197							0.718391	0.673563	-0.0448287	0.238858	0.211468	-0.0273897	0.670361	0.631501	-0.0388598
RASGRP3	up	0.0676437	0.0689172	0.00127355	0.784632	0.759501	-0.0251313	0.326634	0.313585	-0.0130482	0.472804	0.443009	-0.0297948	0.669649	0.63243	-0.0372197	0.709001	0.668198	-0.0408035
RBL1					0.902385	0.81987	-0.0825146	0.00582607	0.00615965	0.000333581	0.45961	0.442109	-0.0175016	0.605718	0.576441	-0.0292762	0.0519769	0.0489373	-0.00303959
RBM11	up	0.285533	0.287016	0.0014825							0.27332	0.25842	-0.0149002	0.652608	0.604994	-0.0476142	0.0960145	0.103417	0.00740215
RBM43					0.801766	0.774581	-0.0271848				0.502315	0.475191	-0.0271236	0.40507	0.416045	0.0109749	0.0495303	0.0453656	-0.00416469
RBM46	up	0.780855	0.758839	-0.0220162				0.419827	0.398269	-0.0215582	0.601046	0.539915	-0.0611313	0.497829	0.469973	-0.0278561	0.854027	0.712513	-0.141514
RBMS3		0.314955	0.313486	-0.00146847							0.760822	0.718804	-0.0420176	0.497084	0.491146	-0.00593746	0.486821	0.498905	0.0120842
RBP4					0.808861	0.809841	0.000980533	0.715126	0.697117	-0.018009	0.909358	0.867614	-0.0417442	0.18809	0.181073	-0.00701604	0.100405	0.111841	0.0114357
RBP7	up	0.0107171	0.0120341	0.00131698	0.806236	0.773	-0.0332358				0.287695	0.280968	-0.00672777	0.650372	0.627466	-0.0229063	0.465571	0.457187	-0.00838395
RDH10	up	0.0420146	0.0366059	-0.00540874							0.607619	0.576873	-0.0307465	0.0469524	0.0626612	0.0157088
RELN		0.350525	0.344565	-0.00595923	0.0505165	0.0645645	0.014048				0.18494	0.176706	-0.00823474	0.482519	0.463023	-0.0194961	0.641919	0.616311	-0.0256078
RERG	down							0.254009	0.23089	-0.0231186	0.890585	0.84652	-0.0440654	0.0479888	0.0455546	-0.00243427	0.0471615	0.0566175	0.00945602
RFC3		0.130734	0.129928	-0.0008064							0.619059	0.579252	-0.0398076	0.555811	0.530225	-0.0255856	0.0519436	0.0538439	0.00190024
RFC5					0.907636	0.841611	-0.0660254	0.0370664	0.0358417	-0.00122462	0.877428	0.820056	-0.0573722	0.187328	0.17066	-0.0166681	0.0396826	0.0373121	-0.00237057
RFPL4B	up	0.926451	0.838131	-0.0883205	0.905647	0.829348	-0.0762987	0.864637	0.805749	-0.0588879	0.867872	0.817528	-0.0503446	0.844385	0.785543	-0.0588424	0.835478	0.792554	-0.0429239
RGS2	down	0.0682642	0.0647564	-0.00350775	0.795956	0.731966	-0.0639901				0.0572309	0.0590909	0.00186003	0.0498801	0.0483369	-0.00154318	0.00804755	0.00820564	0.000158093
RHBDD1					0.705342	0.733242	0.0278998	0.0368219	0.0374762	0.000654312	0.694255	0.665122	-0.029133	0.0734204	0.0693586	-0.00406179	0.069529	0.0718039	0.00227495
RHBDL2	down	0.0505027	0.0482295	-0.00227323							0.821446	0.762913	-0.0585332	0.793362	0.762852	-0.0305099	0.0755961	0.0853065	0.00971039
RHOBTB3	up	0.022151	0.0175185	-0.00463249	0.889594	0.857621	-0.0319731				0.561154	0.536905	-0.0242494	0.0736556	0.0772216	0.00356598	0.0390229	0.0449606	0.0059377
RHOD		0.0738459	0.0696099	-0.00423603	0.636537	0.62699	-0.00954714				0.68864	0.666507	-0.0221323	0.187107	0.184103	-0.00300397	0.0633975	0.0662	0.00280248
RHOF	up	0.569382	0.563711	-0.0056711	0.88526	0.886907	0.0016477				0.830443	0.822751	-0.00769203	0.278938	0.274834	-0.00410337	0.162372	0.165308	0.00293599
RHOXF2B											0.733093	0.715947	-0.0171457
RIN2		0.0652033	0.0552527	-0.00995056	0.814577	0.739163	-0.0754147				0.208183	0.20142	-0.00676294	0.696605	0.671036	-0.0255693	0.183538	0.161051	-0.0224878
RLIM								0.0698861	0.0628207	-0.00706537				0.242322	0.222083	-0.0202397	0.0586069	0.0562516	-0.00235531
RLN3		0.927949	0.895627	-0.0323217										0.926154	0.899131	-0.0270233	0.838419	0.800028	-0.038391
RNF113B					0.805455	0.7838	-0.0216555							0.782735	0.718986	-0.0637488
RNF152	down	0.792342	0.762203	-0.0301393	0.903435	0.896519	-0.0069159	0.897158	0.836666	-0.0604916	0.962806	0.944204	-0.0186021	0.0638778	0.0656812	0.00180336	0.79531	0.757268	-0.0380413
RNF213	down				0.810079	0.751743	-0.0583363	0.368471	0.365912	-0.00255946	0.870824	0.830963	-0.0398609	0.425812	0.412341	-0.0134712
RNF41		0.00729165	0.00233021	-0.00496143	0.812069	0.800619	-0.0114505	0.364188	0.348001	-0.016187	0.562317	0.577293	0.0149762	0.923763	0.904218	-0.0195447	0.0408127	0.0420658	0.00125314
RNFT1		0.00698297	0.0053478	-0.00163516							0.281943	0.270594	-0.0113489	0.0411673	0.041426	0.000258682	0.0323971	0.0299471	-0.00245003
RNFT2		0.0434089	0.0468292	0.0034203	0.883543	0.86963	-0.0139128				0.696512	0.68151	-0.0150022	0.0800969	0.0753246	-0.00477231
RNLS		0.0253816	0.0294611	0.00407958	0.901157	0.839701	-0.0614554				0.638282	0.603084	-0.0351983	0.3252	0.306665	-0.0185354	0.0633728	0.0653975	0.00202464
ROPN1L	up	0.0347555	0.0345273	-0.000228154							0.695289	0.654645	-0.0406438	0.0474135	0.0489835	0.00157	0.0291209	0.0302247	0.00110378
ROS1	up	0.862904	0.758743	-0.104162	0.458451	0.45534	-0.00311073	0.900489	0.821052	-0.0794363	0.782583	0.777339	-0.00524396	0.818252	0.755827	-0.0624249
RPA1					0.89227	0.863496	-0.028774				0.76136	0.738267	-0.0230937	0.339308	0.332538	-0.00677032
RPGR	up							0.0481378	0.0537832	0.00564535	0.31813	0.313636	-0.00449452	0.180688	0.188426	0.00773819	0.0317593	0.0333586	0.00159932
RPL22L1		0.000841383	0.00263491	0.00179353							0.458494	0.41624	-0.0422539	0.343572	0.321656	-0.0219164	0.0534251	0.051364	-0.00206116
RPL39L					0.79233	0.774564	-0.0177662	0.481079	0.453767	-0.0273121				0.0461028	0.0459865	-0.000116382	0.0467066	0.0463204	-0.000386173
RPLP0P2	up										0.595201	0.580294	-0.0149071	0.8493	0.826967	-0.0223336
RPS7	up							0.048947	0.0539047	0.00495765	0.415878	0.380425	-0.0354525	0.367272	0.351718	-0.0155536	0.0493809	0.04963	0.000249039
RPTOR	down	0.0561478	0.0552589	-0.000888931	0.898624	0.857721	-0.0409026				0.829655	0.784379	-0.0452764	0.87682	0.848416	-0.0284042	0.0580536	0.0535275	-0.00452604
RRAGA		0.103929	0.103607	-0.00032153										0.388719	0.363594	-0.0251257	0.0557282	0.0614855	0.00575736
RSAD2		0.674692	0.666875	-0.00781703	0.67127	0.612991	-0.0582785				0.383807	0.382045	-0.0017619	0.612826	0.571588	-0.0412383	0.0754223	0.0862361	0.0108138
RSU1	down	0.53932	0.552989	0.0136698	0.886248	0.783083	-0.103165	0.409925	0.397347	-0.0125776	0.760552	0.726543	-0.0340083	0.116251	0.115308	-0.000943671	0.0693695	0.0745795	0.00521005
RTKN2		0.05492	0.0518065	-0.00311351							0.54254	0.518032	-0.0245087	0.0971754	0.0989572	0.00178189	0.0438095	0.0465766	0.00276706
RTN1		0.196087	0.20613	0.010043	0.554294	0.481741	-0.0725529				0.396474	0.37571	-0.0207644	0.104207	0.104528	0.000320796	0.078957	0.0835037	0.00454672
RTP3											0.864699	0.823103	-0.0415962	0.809646	0.791947	-0.0176991
S100A3	up				0.309997	0.317656	0.0076597	0.376866	0.369262	-0.0076043	0.854221	0.861674	0.00745233	0.682958	0.661909	-0.0210488	0.159667	0.164532	0.00486486
S100A7	down							0.684005	0.686374	0.0023689	0.303617	0.297331	-0.0062867
S100A8	down							0.173043	0.171062	-0.00198161	0.583919	0.601189	0.0172698	0.057049	0.0685785	0.0115295	0.0602713	0.0607529	0.000481607
S100A9	down				0.861878	0.84737	-0.0145073	0.288012	0.283498	-0.00451374	0.75286	0.718521	-0.0343387	0.454502	0.448926	-0.00557613	0.0484003	0.04588	-0.00252028
SAA1	up	0.300017	0.287699	-0.0123184	0.859334	0.835181	-0.0241532				0.867041	0.851888	-0.0151531	0.657139	0.629077	-0.0280612	0.0776987	0.0697811	-0.00791758
SAA2	up				0.902125	0.809917	-0.0922081				0.908343	0.875596	-0.0327471	0.866458	0.833919	-0.0325395	0.0978974	0.0989054	0.00100797
SALL4	up	0.982629	0.928609	-0.0540198	0.826141	0.812643	-0.0134975				0.558198	0.532004	-0.0261937	0.933736	0.896411	-0.0373243	0.896635	0.849503	-0.0471325
SAMD4A	up	0.0218386	0.0184598	-0.00337879	0.847431	0.824431	-0.0229999	0.419117	0.430996	0.0118789	0.736113	0.702142	-0.0339708	0.299829	0.29175	-0.00807856	0.0433616	0.0460556	0.002694
SAMHD1		0.0632955	0.0651559	0.00186038	0.872196	0.85663	-0.0155664				0.275456	0.257321	-0.0181353	0.509059	0.497492	-0.0115671	0.169435	0.167648	-0.0017867
SAP25	up							0.834513	0.807091	-0.027422	0.677422	0.649224	-0.028198	0.814507	0.777556	-0.036951
SARS		0.056863	0.0590275	0.00216453	0.814519	0.78161	-0.0329088				0.394385	0.385996	-0.00838896	0.830694	0.793989	-0.0367052	0.0949443	0.100262	0.00531762
SBF2		0.0798477	0.0879303	0.00808255	0.892798	0.832744	-0.0600536	0.0436734	0.0409693	-0.00270405	0.577501	0.546412	-0.0310888	0.180223	0.167828	-0.0123951	0.032433	0.029615	-0.00281803
SBNO1		0.931896	0.896568	-0.0353278	0.884297	0.862823	-0.0214734				0.882045	0.838079	-0.0439657	0.839739	0.834357	-0.00538203
SCARNA9L											0.857088	0.802097	-0.0549905	0.885274	0.808138	-0.0771361	0.923712	0.851967	-0.0717448
SCD	down	0.0682341	0.0609259	-0.00730822	0.806203	0.755926	-0.0502776	0.116544	0.116913	0.000368435	0.240203	0.224703	-0.0154998	0.112345	0.102605	-0.0097401	0.0625711	0.0620266	-0.00054455
SCD5		0.0802321	0.0834982	0.00326619	0.840294	0.764633	-0.0756605	0.0332233	0.035118	0.00189469	0.67816	0.651916	-0.0262442	0.528229	0.520465	-0.00776372	0.0234709	0.0266098	0.00313888
SCEL	up				0.0997416	0.101623	0.00188137	0.85632	0.818818	-0.037502	0.118103	0.114353	-0.00375008	0.58451	0.591103	0.00659336	0.0685318	0.0606846	-0.00784722
SCFD2	down	0.0580995	0.0596987	0.00159926	0.50097	0.461458	-0.0395125	0.0906622	0.0893788	-0.00128338	0.718302	0.692457	-0.0258455	0.468869	0.429365	-0.0395039	0.0536384	0.0562954	0.00265697
SCIN	up	0.324712	0.330863	0.0061509				0.0407078	0.0355472	-0.00516054	0.684874	0.660573	-0.0243016	0.122864	0.113773	-0.00909066	0.0447966	0.0466902	0.00189359
SCMH1	down							0.516226	0.49497	-0.0212566	0.403185	0.399608	-0.00357696	0.24782	0.235639	-0.0121819	0.0288785	0.0272253	-0.00165319
SCNN1A	down				0.907011	0.859787	-0.0472236	0.0853853	0.0877384	0.00235307	0.240574	0.236643	-0.00393087	0.373574	0.359063	-0.0145107	0.406123	0.41197	0.00584723
SCPEP1	down				0.501551	0.4503	-0.0512505				0.485783	0.465657	-0.0201261	0.310051	0.295658	-0.0143937	0.0806382	0.0806382	6.33333e-08
SDC2	up				0.528082	0.503819	-0.0242629	0.0694687	0.0779391	0.00847043	0.502031	0.487799	-0.0142319	0.266899	0.245632	-0.0212667	0.0731008	0.0739599	0.000859065
SDCCAG8	down				0.904221	0.851242	-0.0529785				0.84066	0.801932	-0.0387274	0.0600273	0.0629221	0.00289475	0.054169	0.0517217	-0.00244727
SDPR	up	0.879218	0.836793	-0.0424243	0.670889	0.691008	0.0201197	0.167186	0.160435	-0.00675145	0.722684	0.712738	-0.00994628	0.634339	0.627963	-0.0063758	0.109184	0.0913252	-0.0178588
SEC61A2								0.0108434	0.0155219	0.00467856	0.692067	0.652602	-0.039465	0.334943	0.315382	-0.0195608	0.0626233	0.064318	0.00169471
SELENBP1	down				0.827503	0.81775	-0.00975323	0.0755307	0.060252	-0.0152787	0.331051	0.325231	-0.00581988	0.678821	0.686138	0.00731664	0.0683246	0.0722188	0.00389418
SEMA3C					0.764707	0.69416	-0.0705472	0.053239	0.0514428	-0.00179616	0.793918	0.718578	-0.07534	0.119483	0.12173	0.00224734	0.0454781	0.0464688	0.000990665
SEMA3E	down	0.0536077	0.0529896	-0.000618072	0.721659	0.663685	-0.0579736				0.634185	0.587683	-0.0465024	0.165699	0.150766	-0.0149329	0.0606157	0.0810177	0.0204021
SEMA3F	down				0.879016	0.879378	0.000361667	0.28591	0.290008	0.0040979	0.741724	0.728777	-0.0129471	0.0665355	0.0689703	0.00243476	0.0251667	0.0173796	-0.00778705
SEMA6D					0.0540015	0.0935418	0.0395404	0.124903	0.132549	0.00764585	0.0795589	0.0932891	0.0137303	0.364064	0.346113	-0.017951
SEMA7A	up	0.0376631	0.0320857	-0.00557739	0.695964	0.713565	0.0176012				0.519868	0.505587	-0.0142812	0.755929	0.741206	-0.0147228	0.170109	0.173174	0.00306555
SEPP1	down	0.069576	0.0656252	-0.00395078										0.367766	0.346745	-0.0210214
SERPINB2								0.0639422	0.070102	0.00615974	0.0882396	0.0765388	-0.0117008	0.0623637	0.0571517	-0.00521205
SERPINB5	up	0.0732139	0.0678917	-0.00532226	0.769843	0.722154	-0.0476883	0.401645	0.398104	-0.00354063	0.51454	0.509448	-0.0050916	0.651671	0.620227	-0.0314434	0.021324	0.0163714	-0.00495262
SERPINB8					0.0976587	0.124314	0.0266548	0.185826	0.186645	0.000818938	0.0619941	0.0626195	0.00062546	0.203089	0.1552	-0.0478883	0.0957922	0.0789863	-0.0168059
SERPIND1		0.891742	0.857752	-0.0339902				0.925711	0.886528	-0.0391837				0.796388	0.763718	-0.03267	0.890207	0.849223	-0.0409843
SERPINE1	up				0.717855	0.687395	-0.03046	0.2777	0.258634	-0.0190666	0.830549	0.796271	-0.0342778	0.262674	0.248806	-0.0138685	0.192865	0.158492	-0.0343736
SERPINF1	up	0.330951	0.322317	-0.00863403	0.895361	0.875647	-0.0197142	0.851939	0.851871	-6.79e-05	0.836816	0.834167	-0.0026483	0.784664	0.787476	0.00281177	0.57913	0.562782	-0.0163483
SERPINI1								0.0625286	0.0628805	0.000351888	0.117754	0.10396	-0.0137936
SERTAD1	up				0.643125	0.630233	-0.0128922	0.0860327	0.085631	-0.000401613	0.821103	0.759767	-0.0613364	0.0713841	0.0643759	-0.00700827	0.0573885	0.0505621	-0.00682642
SERTAD4					0.889922	0.819104	-0.0708175	0.442831	0.41805	-0.0247817	0.822276	0.762068	-0.0602076	0.198062	0.203452	0.00538965
SESN2					0.81096	0.789009	-0.0219507	0.0511111	0.0502882	-0.000822873	0.414421	0.404345	-0.0100759	0.475423	0.458694	-0.0167284	0.0469788	0.0486487	0.00166987
SFMBT1		0.0821566	0.080022	-0.00213464	0.849497	0.825076	-0.0244212	0.55725	0.53021	-0.0270402	0.210338	0.189986	-0.0203515	0.0568137	0.0561527	-0.000661043
SFN		0.0661153	0.0716965	0.00558125										0.0640858	0.0615575	-0.00252839	0.055889	0.0545749	-0.00131414
SFTA1P	up										0.0910269	0.0858214	-0.00520548	0.51175	0.485613	-0.0261365
SFXN2	down				0.889585	0.881603	-0.00798177	0.477702	0.460626	-0.0170756	0.508782	0.495017	-0.0137651				0.0504491	0.0514421	0.000992967
SGK1	up	0.498656	0.481406	-0.0172496	0.84656	0.821732	-0.0248276				0.437508	0.431029	-0.00647886	0.692168	0.636384	-0.0557838	0.493037	0.482914	-0.0101234
SGPL1					0.0463249	0.0534352	0.00711033	0.120816	0.119636	-0.00117948	0.701182	0.649533	-0.0516496	0.665083	0.607323	-0.0577595	0.0522466	0.0539862	0.00173956
SH2D1B		0.699961	0.701588	0.0016265	0.594099	0.620246	0.0261475				0.415838	0.411836	-0.00400263	0.687607	0.6753	-0.0123075
SH3KBP1		0.0156374	0.0174455	0.00180811	0.670382	0.642053	-0.0283295				0.470509	0.443147	-0.0273624	0.493607	0.452186	-0.0414212
SH3PXD2B	down				0.775973	0.761147	-0.0148263	0.0134253	0.020638	0.00721266	0.682119	0.659218	-0.0229008	0.292148	0.280603	-0.0115442	0.0932426	0.0989108	0.00566821
SH3RF2		0.043049	0.0428174	-0.000231593	0.900534	0.895312	-0.00522187	0.0952327	0.0988582	0.00362556	0.664416	0.621817	-0.0425984	0.647689	0.598858	-0.048831	0.0565729	0.0562361	-0.000336826
SHANK2	down	0.893356	0.821175	-0.0721813	0.68537	0.672577	-0.0127937	0.674674	0.640913	-0.0337607	0.812236	0.778392	-0.033845	0.88768	0.841553	-0.0461275	0.889473	0.881318	-0.00815477
SHCBP1		0.00497784	0.00535264	0.000374805	0.935303	0.846394	-0.0889094				0.32605	0.303121	-0.0229286	0.616062	0.560921	-0.055141	0.0185577	0.0180836	-0.000474112
SHISA2	up	0.503443	0.50761	0.00416683	0.767126	0.773949	0.0068233				0.667421	0.648365	-0.0190567	0.262541	0.254441	-0.00810042	0.310645	0.303534	-0.00711099
SHMT2		0.30847	0.292217	-0.0162532	0.88079	0.842177	-0.0386128	0.0651904	0.0666123	0.0014219	0.2645	0.254567	-0.00993278	0.35165	0.329031	-0.022619	0.0296876	0.0360631	0.00637547
SIRT5		0.065326	0.0691722	0.0038462	0.793899	0.764605	-0.0292937	0.360838	0.345077	-0.0157609	0.777665	0.740376	-0.0372899	0.0944574	0.0940726	-0.000384813	0.0113195	0.0102659	-0.00105365
SLBP					0.0500172	0.0505405	0.0005233	0.110978	0.108364	-0.00261368	0.247558	0.246837	-0.000720774	0.0350154	0.0335281	-0.00148726	0.00985264	0.0159809	0.00612827
SLC14A1					0.516945	0.501735	-0.0152098	0.801557	0.778547	-0.0230102	0.708057	0.675457	-0.0325996	0.33963	0.321049	-0.0185809	0.59996	0.5982	-0.00175983
SLC16A1	up	0.0522471	0.0471713	-0.0050758	0.908514	0.86591	-0.0426036	0.325527	0.301276	-0.0242511	0.674306	0.654956	-0.0193502	0.692648	0.668278	-0.0243699	0.0505942	0.0529564	0.00236221
SLC16A4	up				0.898834	0.806788	-0.0920459	0.836084	0.777923	-0.0581606	0.872228	0.815321	-0.0569066	0.808846	0.695062	-0.113784	0.78015	0.770399	-0.00975067
SLC16A9	up	0.207465	0.201595	-0.00587003	0.858814	0.817875	-0.0409394	0.619637	0.598214	-0.0214226	0.560221	0.565649	0.00542873	0.724409	0.70193	-0.0224787	0.244409	0.243113	-0.0012953
SLC17A5		0.0633978	0.0820048	0.0186069	0.696392	0.69295	-0.0034412	0.0361023	0.0369939	0.000891617	0.0410308	0.039815	-0.00121583	0.0673215	0.0695622	0.00224075	0.0410059	0.0416234	0.000617453
SLC1A5		0.0513066	0.0534973	0.00219066							0.147235	0.119024	-0.0282106	0.276628	0.27769	0.00106221	0.111706	0.106972	-0.00473422
SLC1A6	down	0.911616	0.823206	-0.0884104							0.886551	0.868391	-0.0181593	0.86687	0.823546	-0.0433238	0.897283	0.868928	-0.0283544
SLC20A1	up				0.760157	0.73175	-0.0284068	0.0895721	0.088625	-0.000947083	0.275205	0.266023	-0.00918177	0.0653374	0.0671923	0.00185492	0.0138038	0.0149615	0.0011577
SLC22A15	up	0.0774883	0.0831683	0.00568005	0.882055	0.83398	-0.0480747	0.0510621	0.056265	0.00520283	0.358749	0.354332	-0.00441721	0.0487337	0.0511639	0.00243026	0.0707221	0.074068	0.00334586
SLC24A3	down	0.0209103	0.0226191	0.00170882	0.906201	0.852019	-0.0541829				0.642559	0.6046	-0.0379597	0.0782126	0.0861447	0.00793218
SLC25A10	down	0.0649997	0.062097	-0.00290275	0.874033	0.834604	-0.0394295				0.687924	0.670902	-0.0170224	0.2479	0.238896	-0.00900435
SLC25A21					0.899508	0.853208	-0.0463003	0.041086	0.0433879	0.00230194	0.565703	0.540489	-0.0252135				0.0882975	0.091718	0.00342051
SLC25A30	up	0.732889	0.727339	-0.00554957	0.623494	0.594196	-0.0292978	0.477369	0.475841	-0.0015283	0.765092	0.713932	-0.0511607	0.79306	0.78017	-0.0128896	0.553003	0.539583	-0.0134207
SLC28A1	down				0.800027	0.759776	-0.0402509	0.752872	0.761049	0.0081766	0.489552	0.477935	-0.0116168	0.793632	0.787847	-0.00578482	0.83512	0.837727	0.0026069
SLC2A3	up	0.380626	0.350017	-0.0306096							0.0320282	0.0576853	0.0256571	0.659306	0.600889	-0.0584168	0.28511	0.252762	-0.0323479
SLC35E3		0.00903009	0.0119843	0.0029542	0.925425	0.831333	-0.0940922				0.428455	0.391889	-0.0365651	0.45908	0.451669	-0.00741179	0.0493434	0.0431371	-0.00620631
SLC37A1	down	0.934387	0.893721	-0.0406656	0.93938	0.908078	-0.0313019	0.363363	0.334881	-0.0284823	0.788972	0.753307	-0.0356642	0.747969	0.714426	-0.0335435	0.877957	0.837187	-0.0407699
SLC38A4		0.907911	0.863617	-0.0442943	0.608778	0.577323	-0.0314547	0.686176	0.657821	-0.0283548	0.604386	0.576393	-0.0279926	0.810727	0.795472	-0.015255	0.862768	0.836701	-0.0260666
SLC38A5		0.745094	0.743995	-0.0010982	0.725644	0.711432	-0.0142121	0.647917	0.634393	-0.0135242	0.63537	0.641619	0.00624893	0.455833	0.45075	-0.00508335	0.798498	0.791672	-0.00682617
SLC39A11	down	0.105384	0.110576	0.00519137	0.965065	0.936194	-0.0288712	0.0838723	0.0873311	0.00345877	0.778369	0.742235	-0.0361347	0.72481	0.697535	-0.0272746	0.0747522	0.0761527	0.00140049
SLC3A2	up										0.267366	0.258347	-0.00901879
SLC44A2					0.397869	0.386677	-0.0111922	0.00726674	0.00946729	0.00220055	0.400736	0.383346	-0.0173896	0.4063	0.394593	-0.0117067	0.0858931	0.081606	-0.00428718
SLC44A4	up				0.0484348	0.0501874	0.00175259	0.805685	0.737624	-0.0680609	0.7347	0.720401	-0.0142992	0.870857	0.853279	-0.0175782	0.818246	0.793296	-0.0249504
SLC46A3	down	0.0398295	0.0400939	0.000264394	0.938312	0.85584	-0.0824719				0.731699	0.658757	-0.0729418	0.271801	0.24874	-0.0230614	0.0492172	0.0532899	0.00407268
SLC4A11	down	0.697749	0.70925	0.0115012	0.570993	0.572528	0.00153507				0.851243	0.812709	-0.038534	0.456186	0.451963	-0.00422303	0.678869	0.695665	0.0167964
SLC5A1	down	0.289354	0.272954	-0.0163996	0.837484	0.78262	-0.0548637	0.299762	0.290606	-0.00915624	0.478029	0.472394	-0.00563485	0.874642	0.8397	-0.0349417	0.061991	0.0552508	-0.00674022
SLC6A14	down				0.923376	0.868765	-0.0546113	0.0953229	0.0878542	-0.00746872	0.529232	0.52753	-0.00170207	0.510916	0.472451	-0.0384651	0.072299	0.0610087	-0.0112902
SLC6A15		0.697	0.683759	-0.0132403				0.249109	0.243678	-0.00543133				0.329087	0.334085	0.00499809	0.572917	0.559138	-0.0137798
SLC6A6					0.886951	0.844835	-0.0421157	0.461082	0.444439	-0.0166432	0.720692	0.67487	-0.0458213	0.707243	0.672275	-0.0349679	0.11946	0.109617	-0.00984365
SLC6A9		0.0454724	0.0432146	-0.00225783	0.842875	0.829541	-0.0133348	0.406708	0.402897	-0.003811	0.866278	0.853886	-0.0123922	0.517851	0.507822	-0.0100286
SLC7A1					0.859857	0.812294	-0.0475632	0.58111	0.55789	-0.02322	0.859799	0.818809	-0.0409894	0.237981	0.23651	-0.0014707	0.0307867	0.0229589	-0.00782782
SLC7A11		0.0599636	0.0566327	-0.00333097							0.778163	0.710216	-0.0679473	0.176904	0.156284	-0.0206197	0.0563417	0.0472571	-0.00908459
SLC7A5		0.0314319	0.0317292	0.00029735	0.891396	0.859709	-0.0316862				0.668546	0.648807	-0.0197388	0.353969	0.341658	-0.0123109	0.0421784	0.0453888	0.00321043
SLC7A8	up				0.821056	0.865857	0.0448005	0.803833	0.776557	-0.0272759	0.802134	0.768349	-0.0337859	0.736815	0.733689	-0.00312537	0.945363	0.815143	-0.13022
SLCO2A1		0.0158151	0.0162992	0.000484059							0.543769	0.534678	-0.0090914	0.591265	0.551738	-0.0395265
SLCO4A1		0.0079105	0.00957522	0.00166472	0.888749	0.871019	-0.0177298	0.36228	0.355687	-0.00659314	0.796956	0.767651	-0.0293054	0.499021	0.505122	0.00610054	0.0188222	0.0161667	-0.00265551
SLCO4C1	up	0.444449	0.444623	0.000173205	0.467501	0.453258	-0.0142426				0.199297	0.196223	-0.00307437	0.443073	0.442948	-0.000125256	0.790274	0.770886	-0.0193878
SLFN12	up	0.151151	0.145251	-0.00590074							0.91371	0.838894	-0.0748168	0.0538151	0.0522553	-0.00155976	0.0890342	0.0828742	-0.00616003
SLFN13		0.478505	0.470941	-0.00756347	0.826873	0.80024	-0.0266332	0.401878	0.37414	-0.0277389	0.473026	0.450447	-0.0225793	0.879408	0.830435	-0.0489734	0.510589	0.497579	-0.0130093
SLFN5		0.121575	0.122756	0.00118117	0.865387	0.785946	-0.0794412	0.32031	0.314165	-0.00614484	0.858054	0.834594	-0.0234599	0.434724	0.411372	-0.0233524	0.0297901	0.0287184	-0.00107163
SLIT2	up							0.610191	0.608151	-0.00204005	0.420685	0.409882	-0.0108031	0.640659	0.623106	-0.0175529	0.731946	0.721338	-0.0106078
SLITRK5		0.696575	0.619455	-0.0771202	0.46879	0.462852	-0.00593847	0.860657	0.819965	-0.0406916	0.743006	0.727636	-0.0153701	0.508397	0.487014	-0.0213832	0.887552	0.886367	-0.0011855
SLPI	down	0.0622919	0.0576366	-0.00465527							0.0337689	0.037424	0.00365506	0.0535649	0.0487288	-0.00483608	0.0343487	0.0504213	0.0160726
SMAD6					0.813817	0.748924	-0.0648935	0.0813815	0.0775487	-0.00383284	0.652093	0.621909	-0.030184	0.294156	0.29149	-0.00266608	0.0676587	0.0725988	0.00494008
SMARCA1	up	0.503938	0.485725	-0.0182133							0.209034	0.192446	-0.0165874	0.823446	0.758132	-0.0653135	0.427075	0.399433	-0.0276422
SMEK3P											0.0843186	0.0708377	-0.0134809				0.0690207	0.0636873	-0.00533345
SNAI1	up	0.0640869	0.0736613	0.00957443	0.691827	0.681747	-0.0100797	0.0120656	0.0126799	0.000614319	0.658506	0.642371	-0.0161347	0.39606	0.389111	-0.00694927	0.0506885	0.046527	-0.00416148
SNAPC1	up	0.0537989	0.0540495	0.000250638	0.871691	0.811248	-0.0604429				0.492548	0.476529	-0.0160182	0.0880112	0.0919994	0.0039882	0.0518328	0.0504999	-0.00133292
SNAR-D	up																0.740645	0.70919	-0.0314553
SNAR-F											0.274777	0.275348	0.000570767	0.675148	0.641346	-0.0338017	0.724878	0.732497	0.00761837
SNAR-G1														0.619761	0.617195	-0.0025657
SNAR-H	up																0.607672	0.593381	-0.0142914
SNHG8											0.0737264	0.0716131	-0.00211325				0.0413774	0.0380281	-0.0033493
SNORD114-1																	0.0622878	0.059701	-0.00258678
SNORD114-13	up													0.0722342	0.0799767	0.00774243
SNORD114-25	down										0.248174	0.225991	-0.0221835	0.0600812	0.0783003	0.0182192	0.0434448	0.0420818	-0.00136304
SNORD116-21																	0.0701651	0.0658927	-0.00427235
SNORD116-26																	0.0598748	0.0657087	0.00583391
SNORD18C														0.633994	0.584958	-0.049036
SNORD93	up													0.454624	0.429158	-0.0254663
SNRNP25					0.865765	0.897541	0.0317763	0.0145324	0.0213809	0.00684846	0.166947	0.168527	0.00158016	0.10312	0.136583	0.033463	0.0334773	0.0367029	0.00322562
SNTB1	down	0.0446343	0.0446087	-2.56175e-05				0.00795621	0.00839972	0.000443511	0.626679	0.592249	-0.0344297	0.351778	0.34106	-0.010718	0.0329604	0.0326154	-0.000345022
SNX10		0.0180373	0.0192012	0.00116387				0.58154	0.542884	-0.0386566	0.756913	0.71405	-0.042863	0.103868	0.0996403	-0.00422794	0.0430938	0.0452073	0.00211353
SORBS2		0.750517	0.720925	-0.0295921	0.960811	0.910423	-0.0503886	0.614559	0.601778	-0.012781	0.721766	0.712135	-0.00963074	0.757976	0.764322	0.00634663	0.636074	0.645821	0.00974698
SORCS2		0.0170088	0.0134223	-0.00358653	0.821985	0.812964	-0.00902083				0.775357	0.7488	-0.0265571	0.617466	0.601048	-0.0164186
SOST		0.895776	0.869833	-0.0259433	0.782788	0.764333	-0.0184552				0.938529	0.869605	-0.0689245	0.274675	0.271919	-0.00275648	0.141811	0.163818	0.0220072
SOSTDC1	down	0.0703928	0.0757828	0.00539001	0.787314	0.641888	-0.145426				0.871191	0.819778	-0.0514129	0.888151	0.808326	-0.0798253	0.16051	0.146112	-0.0143976
SOX15	up	0.795009	0.773612	-0.0213977	0.694307	0.618548	-0.0757591				0.705892	0.701337	-0.0045543	0.460901	0.451285	-0.00961652	0.0778799	0.0887136	0.0108336
SOX30		0.462606	0.459616	-0.00298926							0.0945373	0.0869524	-0.0075849	0.291784	0.263792	-0.027992	0.686112	0.671051	-0.0150607
SOX9					0.97393	0.920491	-0.0534392	0.0624286	0.0634165	0.000987943	0.638842	0.621814	-0.0170284	0.2318	0.22139	-0.0104107	0.0589359	0.0630047	0.00406883
SP140					0.834059	0.807957	-0.0261013	0.681222	0.652608	-0.0286145	0.737832	0.728845	-0.00898657	0.348782	0.345108	-0.0036736	0.717151	0.707645	-0.00950572
SPAG1	up							0.246669	0.229277	-0.0173924	0.245744	0.239562	-0.0061826	0.06596	0.0641414	-0.00181855
SPARC	up	0.355286	0.300206	-0.0550796	0.863619	0.842496	-0.0211229	0.693329	0.651341	-0.0419878	0.81608	0.802578	-0.0135019	0.528829	0.50825	-0.0205789	0.273011	0.228496	-0.044515
SPC24	down	0.00786558	0.0134323	0.00556668	0.881583	0.844796	-0.0367872	0.0102645	0.0103184	5.3869e-05	0.128663	0.117802	-0.0108608	0.224798	0.221544	-0.00325392	0.0525901	0.0529499	0.000359796
SPDEF	down	0.084773	0.0919903	0.00721725	0.481435	0.46812	-0.0133148	0.297736	0.288163	-0.00957305	0.800196	0.781121	-0.0190748	0.723842	0.700246	-0.0235962	0.153985	0.149569	-0.00441641
SPG7		0.0594459	0.0657061	0.00626019	0.214009	0.19523	-0.0187786				0.874793	0.833022	-0.0417713	0.670167	0.640789	-0.0293775	0.00853316	0.00947537	0.000942216
SPINT2		0.0259708	0.0256212	-0.000349593	0.878495	0.831184	-0.047311	0.0159871	0.0131981	-0.00278904	0.0810888	0.0761048	-0.00498406	0.240719	0.22944	-0.0112796
SPNS2	down	0.0345359	0.0359398	0.00140392	0.81872	0.77486	-0.04386				0.423757	0.40931	-0.0144466	0.0927704	0.100133	0.00736239	0.0308753	0.0273043	-0.00357105
SPP1	up	0.793937	0.754791	-0.0391467							0.861388	0.805999	-0.0553887	0.732031	0.643369	-0.0886622	0.434121	0.398427	-0.0356937
SPRED1	up				0.763875	0.786384	0.0225092	0.0339486	0.034479	0.000530403	0.716685	0.671324	-0.045361	0.0536217	0.0554369	0.00181523	0.0499251	0.0485262	-0.0013989
SPRY1	down	0.0688019	0.0658782	-0.00292367	0.890052	0.838482	-0.0515702	0.0977109	0.0937433	-0.00396758	0.851731	0.818801	-0.0329294				0.0727487	0.0639009	-0.00884781
SPRY2	up	0.0957774	0.102447	0.00666939	0.889721	0.821572	-0.068149	0.0543445	0.0621521	0.0078076	0.924439	0.871501	-0.0529381	0.0670287	0.0654549	-0.0015738	0.0479555	0.0534364	0.00548086
SPRY4	up				0.882484	0.845248	-0.0372368	0.404057	0.387993	-0.0160646	0.702212	0.673132	-0.0290794	0.0572387	0.0600056	0.00276687	0.0729585	0.0734934	0.000534854
SPTLC3	down				0.826496	0.776685	-0.0498104	0.0538888	0.0434014	-0.0104874	0.757996	0.661608	-0.0963882	0.830383	0.769188	-0.0611948
SREBF1	down	0.00538644	0.00783759	0.00245116	0.430128	0.412268	-0.0178606				0.389011	0.361398	-0.0276125	0.200307	0.197768	-0.00253888	0.0285388	0.0287663	0.000227441
SRGAP1	up	0.0493551	0.0507899	0.00143482	0.883516	0.835769	-0.0477469				0.696477	0.65101	-0.0454666	0.254725	0.246528	-0.00819674	0.0542092	0.0565564	0.00234717
SRGN	up	0.727495	0.678088	-0.0494066							0.830801	0.791106	-0.0396946	0.854415	0.842621	-0.0117943	0.561148	0.565	0.0038525
SRPX2	up	0.436005	0.418066	-0.017939							0.948776	0.918034	-0.0307413	0.793325	0.751029	-0.0422956	0.0895689	0.0731751	-0.0163939
SSBP2	down										0.54329	0.507483	-0.0358063	0.504878	0.452734	-0.0521441	0.0828167	0.0828695	5.28875e-05
SSH1		0.933986	0.916813	-0.0171726	0.937237	0.903719	-0.0335178	0.0166063	0.0136187	-0.00298752	0.728479	0.69563	-0.0328493	0.216212	0.21679	0.000577342	0.836696	0.788709	-0.0479871
SSH3	down				0.107527	0.117292	0.00976517	0.0132313	0.0148983	0.00166701	0.368086	0.365209	-0.0028773	0.0719344	0.0720112	7.68433e-05	0.0660562	0.0681379	0.0020817
SSX1	up				0.0854665	0.0925862	0.00711973	0.101664	0.0949476	-0.00671683				0.770293	0.750515	-0.019778
SSX4B	up																0.197901	0.178632	-0.0192689
SSX9								0.458394	0.440483	-0.0179109	0.236586	0.250754	0.0141677	0.196898	0.18324	-0.0136574	0.364868	0.343038	-0.02183
ST6GALNAC3		0.393914	0.384585	-0.00932962	0.508	0.490609	-0.0173907				0.651117	0.628724	-0.0223928	0.355345	0.350853	-0.00449196	0.457088	0.43182	-0.0252673
ST6GALNAC5		0.0421975	0.0414623	-0.000735228	0.888602	0.830847	-0.0577541				0.370873	0.341097	-0.0297763	0.78276	0.727527	-0.0552333	0.0428147	0.035341	-0.00747377
ST8SIA1	down				0.889117	0.852212	-0.0369054	0.0506928	0.0473407	-0.00335214	0.635634	0.608659	-0.0269741	0.0829258	0.0740062	-0.00891959	0.0461525	0.0501043	0.00395177
STAC2	down	0.683203	0.710275	0.0270729	0.759598	0.791048	0.0314497				0.521106	0.527187	0.0060811	0.582738	0.588296	0.00555798	0.568843	0.587492	0.0186496
STAG3		0.982603	0.867268	-0.115335				0.855961	0.790137	-0.0658243	0.641367	0.658623	0.0172566	0.0622735	0.0632378	0.000964306	0.948858	0.874139	-0.0747193
STARD5	up	0.037931	0.0451157	0.00718469	0.232492	0.221085	-0.0114072	0.0120039	0.0112716	-0.00073233	0.519989	0.513543	-0.00644652	0.317824	0.308086	-0.00973777	0.035693	0.0387567	0.00306369
STC2		0.0804089	0.0865181	0.00610921	0.835981	0.791098	-0.0448832	0.0925348	0.0970621	0.00452737	0.60687	0.563563	-0.0433075	0.405965	0.394672	-0.0112924	0.0466982	0.0514481	0.00474991
STEAP1		0.0777928	0.0788872	0.00109434				0.569235	0.556439	-0.0127965				0.384059	0.385875	0.00181543	0.109839	0.112716	0.00287761
STEAP2		0.457206	0.419645	-0.0375607	0.100579	0.0861907	-0.0143878	0.267663	0.259119	-0.00854387	0.0732077	0.0760346	0.00282696	0.141175	0.130305	-0.0108699	0.465666	0.459363	-0.0063025
STEAP4					0.916995	0.836447	-0.0805477	0.064934	0.0665763	0.00164234	0.932264	0.901773	-0.030491	0.816002	0.757171	-0.0588306	0.0776854	0.0774868	-0.000198637
STK17A	up	0.0821565	0.0841259	0.00196933	0.883345	0.856285	-0.02706				0.520847	0.48778	-0.0330671	0.0552229	0.0567634	0.00154051	0.0916504	0.094833	0.00318264
STK31	up	0.908953	0.840499	-0.0684545				0.929241	0.869673	-0.0595676	0.81532	0.776397	-0.0389239	0.911586	0.860398	-0.0511878	0.88765	0.813251	-0.0743989
STK38		0.0247183	0.023946	-0.000772321	0.80846	0.746276	-0.0621835	0.0574671	0.053507	-0.00396017	0.793551	0.750087	-0.0434644	0.601168	0.60152	0.000352417	0.0526624	0.0610282	0.00836574
STOM	up							0.0988322	0.0942567	-0.00457554	0.389554	0.359659	-0.0298955	0.822738	0.69225	-0.130488
STX8	down				0.902238	0.86774	-0.0344983	0.0384362	0.0433092	0.00487298	0.647946	0.616133	-0.031813
STXBP1		0.07727	0.0823458	0.00507581	0.823194	0.797306	-0.0258877				0.485537	0.461756	-0.0237809	0.0936882	0.0968173	0.00312906
STYK1	up				0.868493	0.857829	-0.0106641	0.0645262	0.0657843	0.00125803	0.906995	0.882879	-0.0241159	0.725701	0.684621	-0.0410793	0.0766719	0.0747225	-0.00194935
SUCLG2	down	0.0186766	0.0232154	0.0045388	0.644478	0.658502	0.014024				0.656374	0.618584	-0.0377901	0.642884	0.613792	-0.0290919	0.0478403	0.0486439	0.000803584
SULT2B1	down	0.0226246	0.0217222	-0.000902407							0.533321	0.517968	-0.0153531	0.519062	0.526653	0.00759134	0.0379484	0.037253	-0.00069538
SUMF1	down	0.030179	0.0279556	-0.00222343	0.915531	0.85256	-0.0629711				0.606691	0.581772	-0.024919	0.532501	0.531366	-0.00113534	0.0771135	0.0740194	-0.00309418
SUMF2	down	0.00824423	0.00496553	-0.0032787							0.345198	0.316824	-0.0283745	0.224882	0.214597	-0.0102845	0.0515076	0.0495724	-0.00193519
SUOX	down				0.906853	0.868748	-0.0381049	0.0567144	0.0554717	-0.00124261	0.93304	0.935106	0.00206633	0.0532164	0.0598724	0.00665598	0.0635524	0.0640639	0.000511439
SUPT3H	down				0.818694	0.752186	-0.0665076	0.921362	0.853768	-0.0675947	0.844034	0.802768	-0.0412659	0.129508	0.127436	-0.00207233
SUSD1											0.569267	0.546333	-0.0229337	0.849653	0.802198	-0.0474553	0.858392	0.824846	-0.0335465
SUSD2					0.0407542	0.0430687	0.00231451	0.0805763	0.0796496	-0.000926757	0.834128	0.819415	-0.0147135	0.0409908	0.0381231	-0.00286773	0.0833106	0.0861396	0.00282898
SUV39H2	up	0.0165444	0.0101675	-0.00637688	0.845585	0.781421	-0.0641642	0.319855	0.322098	0.00224304	0.839256	0.755617	-0.0836392	0.0439139	0.0457338	0.00181996	0.0570494	0.0624407	0.00539137
SVEP1	up	0.196246	0.192019	-0.00422749							0.845704	0.784572	-0.0611325	0.602519	0.571814	-0.0307048	0.477566	0.456844	-0.0207216
SYCP2		0.924554	0.841467	-0.0830876				0.830897	0.82593	-0.0049666	0.844329	0.794988	-0.049341	0.905396	0.883812	-0.0215834	0.889901	0.814825	-0.0750756
SYCP3	up							0.891609	0.844549	-0.0470598	0.800644	0.7665	-0.0341438	0.833948	0.794398	-0.0395503	0.956617	0.917033	-0.0395835
SYNM		0.185826	0.181569	-0.00425672	0.91074	0.863334	-0.0474058				0.853035	0.818204	-0.0348307	0.0708095	0.0745825	0.00377299	0.0218506	0.0191335	-0.00271718
SYT11	up	0.29813	0.290998	-0.00713188	0.778486	0.7933	0.0148143				0.702552	0.698368	-0.00418417	0.367059	0.345986	-0.0210723	0.0522077	0.0518536	-0.000354115
SYT12	down				0.86239	0.831622	-0.0307685	0.197306	0.194527	-0.00277812	0.608259	0.587602	-0.0206563	0.069637	0.0698245	0.000187471
SYT16	up	0.479366	0.503534	0.0241684	0.71171	0.662676	-0.0490334				0.507013	0.505298	-0.00171532	0.697941	0.716231	0.0182899
SYT7	down	0.068175	0.0827998	0.0146248	0.661737	0.674808	0.0130711				0.675727	0.650199	-0.0255288	0.293104	0.283785	-0.00931897
SYTL2	up	0.84274	0.798565	-0.0441753	0.89228	0.836749	-0.0555313	0.532745	0.494355	-0.0383899	0.731123	0.690998	-0.0401251	0.574661	0.554198	-0.0204628	0.425811	0.407621	-0.0181902
TACSTD2		0.0530746	0.0462967	-0.00677787	0.0679159	0.0646973	-0.00321858	0.0610225	0.0562505	-0.00477205				0.208912	0.189977	-0.0189346	0.0487034	0.0459046	-0.00279885
TAF11		0.110123	0.11011	-1.28178e-05	0.816291	0.763906	-0.0523848				0.458309	0.420447	-0.0378615	0.0621194	0.0696615	0.00754211	0.0517841	0.0527757	0.00099163
TAF1A	up	0.0527735	0.058313	0.00553945				0.436432	0.381029	-0.0554028				0.252504	0.243439	-0.00906504	0.0502758	0.0508318	0.00055596
TAF1D											0.104424	0.0986455	-0.00577831	0.305169	0.282027	-0.0231418
TAF5	up	0.0580681	0.0543555	-0.00371261							0.340898	0.32063	-0.0202678	0.775042	0.746403	-0.0286392	0.0607409	0.0590714	-0.00166954
TAF7		0.895793	0.809948	-0.0858442	0.931538	0.835488	-0.096051	0.0570467	0.0489512	-0.00809547				0.0519862	0.0472254	-0.00476086	0.0423537	0.0371571	-0.00519659
TAP1	up							0.0932384	0.0866285	-0.00660988	0.776931	0.729604	-0.0473265				0.152916	0.155384	0.0024683
TAS2R10	down																0.88713	0.804794	-0.0823363
TATDN1								0.0743211	0.0710954	-0.00322571	0.351462	0.337625	-0.0138367	0.0719127	0.0754502	0.00353753	0.0497746	0.0486059	-0.00116869
TBC1D16	down				0.80815	0.77975	-0.0283998	0.835018	0.793126	-0.0418922	0.776842	0.740181	-0.0366608
TBC1D19		0.0577254	0.0623862	0.00466074	0.821142	0.782125	-0.0390165	0.074874	0.0739469	-0.000927072	0.823091	0.79316	-0.0299309	0.488237	0.448453	-0.0397841	0.260538	0.241123	-0.0194149
TBC1D22A	down	0.0333563	0.0352523	0.00189604	0.851751	0.819115	-0.0326359				0.827421	0.785954	-0.0414673	0.055111	0.0562903	0.00117937	0.0616311	0.0676565	0.00602549
TBC1D5	down	0.653906	0.606485	-0.0474206	0.785928	0.755915	-0.0300131	0.536454	0.529042	-0.00741244	0.798944	0.76591	-0.0330336	0.092448	0.0937195	0.00127148	0.0369346	0.0243439	-0.0125907
TBCD	down				0.777881	0.818175	0.040294	0.0143375	0.0128616	-0.00147595	0.744103	0.704019	-0.040084	0.582082	0.520698	-0.0613836	0.013908	0.0141092	0.000201205
TC2N		0.83401	0.805584	-0.0284263	0.840666	0.756639	-0.0840272	0.353931	0.332284	-0.0216472	0.936172	0.835328	-0.100844	0.745626	0.72179	-0.0238358	0.419514	0.405587	-0.0139268
TDRD1	up	0.966452	0.918096	-0.0483559	0.806003	0.760965	-0.0450381	0.79597	0.773756	-0.0222144	0.894566	0.87587	-0.0186952	0.805788	0.756915	-0.0488725	0.90593	0.884036	-0.0218939
TDRD12	up							0.912079	0.835628	-0.0764501	0.901173	0.837568	-0.0636046	0.47494	0.444853	-0.0300867	0.903027	0.83134	-0.0716869
TDRD6	up	0.85136	0.795419	-0.0559408										0.907639	0.851313	-0.0563257	0.685831	0.667502	-0.0183292
TDRD9	up							0.708119	0.649154	-0.0589648	0.67532	0.667239	-0.00808055	0.646724	0.625765	-0.0209591	0.760104	0.746538	-0.0135658
TEAD1	up	0.0691113	0.0578462	-0.0112652	0.888448	0.861625	-0.0268225	0.588947	0.557625	-0.0313211	0.729927	0.693498	-0.0364293	0.04613	0.0576255	0.0114955	0.0343456	0.0322022	-0.0021434
TEAD2	down				0.868367	0.844293	-0.0240742	0.0509087	0.0530004	0.00209171	0.970081	0.959941	-0.0101399
TEC					0.923173	0.90385	-0.0193237	0.390278	0.372182	-0.0180962	0.725843	0.691672	-0.034171	0.176984	0.172097	-0.00488638	0.0185193	0.0205373	0.00201801
TES	up				0.918014	0.843833	-0.0741812	0.0896635	0.0914107	0.00174714	0.541118	0.501338	-0.0397799	0.761016	0.705383	-0.0556328	0.0536462	0.0531076	-0.000538599
TET1		0.0894753	0.0889938	-0.000481448	0.827711	0.795247	-0.0324647	0.359628	0.355592	-0.00403595	0.671885	0.63967	-0.0322146	0.163348	0.156515	-0.00683258	0.0635997	0.0665644	0.00296469
TEX11								0.2397	0.22493	-0.0147702	0.488951	0.4886	-0.0003508	0.539069	0.530486	-0.0085833	0.87619	0.844365	-0.0318255
TEX14	up	0.985889	0.957223	-0.0286663	0.671671	0.683179	0.0115077	0.618245	0.59172	-0.0265246	0.41893	0.407588	-0.0113418	0.381587	0.375809	-0.00577793	0.923159	0.88596	-0.0371989
TEX15	up	0.370998	0.383561	0.0125634										0.668041	0.633439	-0.0346024
TEX9	down	0.0551479	0.0544642	-0.000683673							0.0428076	0.0367558	-0.00605171	0.0592199	0.0599432	0.000723303	0.0128636	0.0134901	0.00062658
TFAP4		0.0505813	0.0506303	4.90311e-05	0.273029	0.271441	-0.0015878				0.611295	0.595628	-0.0156672	0.098375	0.0953566	-0.00301843	0.0615573	0.0630215	0.00146419
TFB1M					0.901178	0.865389	-0.0357896	0.0958815	0.0905428	-0.00533866	0.623296	0.587473	-0.0358226	0.154905	0.140808	-0.0140966	0.0309018	0.0310487	0.000146969
TFCP2L1	down				0.836405	0.822474	-0.0139313	0.0681951	0.0647361	-0.00345903	0.700416	0.681032	-0.0193842	0.165452	0.177409	0.0119577	0.0764349	0.0941585	0.0177237
TFE3		0.0693789	0.0933538	0.0239749	0.857744	0.846754	-0.0109901				0.374191	0.384176	0.00998456	0.289666	0.277509	-0.0121565	0.0426582	0.0424758	-0.000182341
TFPI		0.688112	0.611625	-0.0764871				0.52516	0.462332	-0.062828				0.642218	0.60862	-0.0335984
TFPI2	up	0.161206	0.157341	-0.00386523							0.635826	0.613921	-0.021905	0.307489	0.283484	-0.0240059	0.0429522	0.0468249	0.00387265
TGFB1I1					0.236946	0.222338	-0.014608				0.583767	0.566811	-0.0169561	0.879068	0.86116	-0.0179076
TGFB2	up	0.057505	0.061254	0.00374897	0.872057	0.798697	-0.0733605				0.307325	0.297854	-0.00947147	0.04683	0.0446483	-0.00218175	0.0127988	0.0117529	-0.00104598
TGFBR3	up	0.0657686	0.0656483	-0.000120281	0.821334	0.833155	0.0118213	0.349784	0.331913	-0.0178704	0.575696	0.544643	-0.0310531	0.76366	0.702818	-0.0608425	0.0664996	0.0731664	0.00666681
TGM2	up				0.869222	0.820081	-0.0491419				0.854714	0.835394	-0.0193198	0.0558455	0.0529883	-0.00285723	0.261556	0.250962	-0.0105937
THBS1	up	0.0330991	0.0324562	-0.000642947	0.871666	0.832298	-0.0393683	0.058995	0.0643929	0.00539793	0.721087	0.679885	-0.0412027	0.058528	0.0591919	0.000663863	0.0339714	0.0371857	0.00321434
THOC6	down													0.127494	0.134666	0.00717213
THY1		0.945339	0.877277	-0.0680622	0.0685483	0.0616149	-0.00693337	0.827451	0.810484	-0.0169672	0.835978	0.773377	-0.0626009	0.823336	0.808742	-0.0145933	0.74454	0.725103	-0.0194374
TIAM2	up	0.707162	0.686371	-0.0207907				0.85085	0.806423	-0.0444275	0.64986	0.620311	-0.0295495	0.896341	0.862116	-0.034225
TIPARP	up	0.0482306	0.046606	-0.00162458	0.846646	0.802408	-0.0442382	0.282418	0.262569	-0.0198491	0.843831	0.790962	-0.0528686	0.139334	0.141229	0.00189484
TJP3	down	0.859827	0.838093	-0.021734							0.894491	0.865815	-0.0286761	0.705821	0.6844	-0.0214209
TK1		0.0888989	0.0775912	-0.0113077	0.447017	0.44421	-0.00280653				0.726535	0.703852	-0.0226836
TK2		0.043371	0.043777	0.000406077	0.0663034	0.0709307	0.00462727	0.0594702	0.0591673	-0.000302918	0.669588	0.645764	-0.0238235				0.226014	0.236967	0.0109535
TKTL1	up				0.283184	0.293787	0.010603				0.46938	0.465537	-0.00384303	0.7839	0.758378	-0.0255219	0.781999	0.776245	-0.00575397
TLR3	down	0.0523809	0.0596042	0.00722322				0.0892425	0.085018	-0.00422444	0.566002	0.539893	-0.0261096	0.10484	0.137935	0.0330947	0.0528502	0.0674897	0.0146396
TLR4											0.0523296	0.0491074	-0.00322217
TLR5	down				0.72749	0.689755	-0.0377348	0.516561	0.503344	-0.0132172	0.788653	0.774737	-0.0139158	0.245601	0.239618	-0.00598357	0.0270289	0.0213205	-0.00570837
TLR6	down				0.627829	0.600121	-0.0277076	0.691473	0.691546	7.34667e-05	0.91418	0.860108	-0.0540721	0.0611652	0.0628018	0.0016366	0.0600329	0.0819011	0.0218682
TMC5					0.869095	0.839692	-0.029403	0.407876	0.386436	-0.0214397	0.900768	0.869117	-0.0316517	0.555654	0.542644	-0.01301	0.07268	0.0761207	0.00344062
TMEM128					0.771455	0.751258	-0.0201974	0.102927	0.127616	0.0246887	0.905994	0.870148	-0.0358462	0.417864	0.397627	-0.0202366	0.0703833	0.0720898	0.00170647
TMEM135	down	0.0296149	0.0269591	-0.0026558	0.911489	0.849022	-0.0624671				0.610371	0.547774	-0.0625974	0.296108	0.290163	-0.00594529	0.0949669	0.102413	0.00744604
TMEM154		0.0725217	0.075565	0.00304321	0.304905	0.291751	-0.0131541				0.619312	0.604475	-0.0148371	0.838285	0.817387	-0.020898	0.099181	0.0937915	-0.00538955
[truncated: 186 more rows]

## Sheet: SUM159
		1stExon	1stExon	1stExon	3'UTR	3'UTR	3'UTR	5'UTR	5'UTR	5'UTR	Body	Body	Body	TSS1500	TSS1500	TSS1500	TSS200	TSS200	TSS200
[truncated: 1,504 more rows]
