# Supplementary material for: Decitabine Response in Breast Cancer Requires Efficient Drug Processing and Is Not Limited by Multidrug Resistance
Source: Oxford University Press journal article supplement (doi:10.1158/1535-7163.mct-19-0745), 2020-03-10
Supplement: 15357163mct190745-sup-226501_2_supp_6105718_q5yvj1.xlsx [file 15357163mct190745-sup-226501_2_supp_6105718_q5yvj1.xlsx]

## Sheet: 231
Overlap Results
Collection(s):	C1, C2, C3, C4, C5, C6, C7, H
# overlaps shown:	100
# genesets in collections:	17810
# genes in comparison (n):	81
# genes in universe (N):	45956
Gene Set Name	# Genes in Gene Set (K)	Description	# Genes in Overlap (k)	k/K	p-value	FDR q-value
RIGGI_EWING_SARCOMA_PROGENITOR_UP	430	Genes up-regulated in mesenchymal stem cells (MSC) engineered to express EWS-FLI1 [GeneID=2130;2321] fusion protein.	13	0.0302	7.42E-13	1.32E-8
NUYTTEN_EZH2_TARGETS_UP	1037	Genes up-regulated in PC3 cells (prostate cancer) after knockdown of EZH2 [GeneID=2146] by RNAi.	16	0.0154	3.44E-11	1.84E-7
GO_REGULATION_OF_INTRACELLULAR_SIGNAL_TRANSDUCTION	1656	Any process that modulates the frequency, rate or extent of intracellular signal transduction.	19	0.0115	6.15E-11	1.84E-7
GSE43955_TH0_VS_TGFB_IL6_TH17_ACT_CD4_TCELL_1H_UP	199	Genes up-regulated in CD4 [GeneID=920] T helper cells (1h): Th0 versus TGFB1 and IL6 [GeneID=7040;3569].	9	0.0452	8.9E-11	1.84E-7
GSE22886_CTRL_VS_LPS_24H_DC_DN	200	Genes down-regulated in comparison of unstimulated dendritic cells (DC) versus 1 day DC stimulated with LPS (TLR4 agonist).	9	0.0450	9.3E-11	1.84E-7
GSE2706_UNSTIM_VS_2H_LPS_AND_R848_DC_DN	200	Genes down-regulated in comparison of unstimulated dendritic cells (DC) at 0 h versus DCs stimulated with LPS (TLR4 agonist) and R848 for 2 h.	9	0.0450	9.3E-11	1.84E-7
GSE43957_UNTREATED_VS_NACL_TREATED_ANTI_CD3_CD28_STIM_CD4_TCELL_DN	200	Genes down-regulated in CD4 [GeneID=920] T helper cells Th0: control versus NaCl treatment.	9	0.0450	9.3E-11	1.84E-7
GSE45365_NK_CELL_VS_CD11B_DC_DN	200	Genes down-regulated in NK cells versus ITGAM+ [GeneID=3684] dendritic cells.	9	0.0450	9.3E-11	1.84E-7
HALLMARK_TNFA_SIGNALING_VIA_NFKB	200	Genes regulated by NF-kB in response to TNF [GeneID=7124].	9	0.0450	9.3E-11	1.84E-7
GRAESSMANN_APOPTOSIS_BY_DOXORUBICIN_UP	1142	Genes up-regulated in ME-A cells (breast cancer) undergoing apoptosis in response to doxorubicin [PubChem=31703].	16	0.0140	1.41E-10	2.51E-7
ZWANG_CLASS_3_TRANSIENTLY_INDUCED_BY_EGF	222	Class III of genes transiently induced by EGF [GeneID =1950] in 184A1 cells (mammary epithelium).	9	0.0405	2.35E-10	3.8E-7
GO_CELLULAR_RESPONSE_TO_ORGANIC_SUBSTANCE	1848	Any process that results in a change in state or activity of a cell (in terms of movement, secretion, enzyme production, gene expression, etc.) as a result of an organic substance stimulus.	19	0.0103	3.88E-10	5.75E-7
BURTON_ADIPOGENESIS_PEAK_AT_2HR	51	Cluster 2: genes maximally expressed at 2 h time point during differentiation of 3T3-L1 fibroblasts into adipocytes (cluster 2) in response to adipogenic hormones.	6	0.1176	4.2E-10	5.75E-7
MEISSNER_BRAIN_HCP_WITH_H3K4ME3_AND_H3K27ME3	1069	Genes with high-CpG-density promoters (HCP) bearing histone H3 dimethylation at K4 (H3K4me2) and trimethylation at K27 (H3K27me3) in brain.	15	0.0140	5.58E-10	7.04E-7
HELLER_HDAC_TARGETS_SILENCED_BY_METHYLATION_UP	461	Genes up-regulated in multiple myeloma (MM) cell lines treated with both decitabine [PubChem=451668] TSA [PubChem=5562].	11	0.0239	5.93E-10	7.04E-7
ONDER_CDH1_TARGETS_2_DN	464	Genes down-regulated in HMLE cells (immortalized nontransformed mammary epithelium) after E-cadhedrin (CDH1) [GeneID=999] knockdown by RNAi.	11	0.0237	6.35E-10	7.07E-7
SCHUETZ_BREAST_CANCER_DUCTAL_INVASIVE_UP	351	Genes up-regulated in invasive ductal carcinoma (IDC) relative to ductal carcinoma in situ (DCIS, non-invasive).	10	0.0285	6.91E-10	7.23E-7
NAGASHIMA_NRG1_SIGNALING_UP	176	Genes up-regulated in MCF7 cells (breast cancer) after stimulation with NRG1 [GeneID=3084].	8	0.0455	9.99E-10	9.89E-7
GO_POSITIVE_REGULATION_OF_CELL_COMMUNICATION	1532	Any process that increases the frequency, rate or extent of cell communication. Cell communication is the process that mediates interactions between a cell and its surroundings. Encompasses interactions such as signaling or attachment between one cell and another cell, between a cell and an extracellular matrix, or between a cell and any other aspect of its environment.	17	0.0111	1.21E-9	1.14E-6
AKT_UP_MTOR_DN.V1_UP	184	Genes up-regulated by everolimus [PubChem = 6442177] in mouse prostate tissue transgenically expressing human AKT1 gene [Gene ID=207] vs untreated controls.	8	0.0435	1.42E-9	1.26E-6
DUTERTRE_ESTRADIOL_RESPONSE_24HR_DN	505	Genes down-regulated in MCF7 cells (breast cancer) at 24 h of estradiol [PubChem=5757] treatment.	11	0.0218	1.54E-9	1.3E-6
LTE2_UP.V1_DN	196	Genes down-regulated in MCF-7 cells (breast cancer) positive for ESR1 [Gene ID=2099] MCF-7 cells (breast cancer) and long-term adapted for estrogen-independent growth.	8	0.0408	2.34E-9	1.81E-6
MEK_UP.V1_DN	196	Genes down-regulated in MCF-7 cells (breast cancer) positive for ESR1 [Gene ID=2099] MCF-7 cells (breast cancer) stably over-expressing constitutively active MAP2K1 [Gene ID=5604] gene.	8	0.0408	2.34E-9	1.81E-6
GSE26343_UNSTIM_VS_LPS_STIM_NFAT5_KO_MACROPHAGE_DN	200	Genes down-regulated in bone marrow-derived macrophages with NFAT5 [GeneID=10725] knockout: control versus stimulated with LPS.	8	0.0400	2.74E-9	1.88E-6
GSE34392_ST2_KO_VS_WT_DAY8_LCMV_EFFECTOR_CD8_TCELL_DN	200	Genes down-regulated in P14 CD8+ T cells: ST2 [GeneID=6761] knockout versus wildtype.	8	0.0400	2.74E-9	1.88E-6
GSE45365_NK_CELL_VS_BCELL_UP	200	Genes up-regulated in NK cells versus B lymphocytes.	8	0.0400	2.74E-9	1.88E-6
PEDRIOLI_MIR31_TARGETS_DN	418	Genes down-regulated in primary LEC cells (lymphatic endothelum) upon overexpression of MIR31 [GeneID=407035].	10	0.0239	3.68E-9	2.43E-6
GO_POSITIVE_REGULATION_OF_INTRACELLULAR_SIGNAL_TRANSDUCTION	876	Any process that activates or increases the frequency, rate or extent of intracellular signal transduction.	13	0.0148	4.57E-9	2.91E-6
DEBIASI_APOPTOSIS_BY_REOVIRUS_INFECTION_UP	314	Genes up-regulated in HEK293 cells (embryonic kidney) at 6 h, 12 h or 24 h after infection with reovirus strain T3A (known as a strong inducer of apoptosis).	9	0.0287	4.91E-9	3.01E-6
WONG_ADULT_TISSUE_STEM_MODULE	721	The 'adult tissue stem' module: genes coordinately up-regulated in a compendium of adult tissue stem cells.	12	0.0166	5.35E-9	3.09E-6
GO_RESPONSE_TO_LIPID	888	Any process that results in a change in state or activity of a cell or an organism (in terms of movement, secretion, enzyme production, gene expression, etc.) as a result of a lipid stimulus.	13	0.0146	5.37E-9	3.09E-6
GO_POSITIVE_REGULATION_OF_RESPONSE_TO_STIMULUS	1929	Any process that activates, maintains or increases the rate of a response to a stimulus. Response to stimulus is a change in state or activity of a cell or an organism (in terms of movement, secretion, enzyme production, gene expression, etc.) as a result of a stimulus.	18	0.0093	5.54E-9	3.09E-6
GSE36891_POLYIC_TLR3_VS_PAM_TLR2_STIM_PERITONEAL_MACROPHAGE_UP	146	Genes up-regulated in peritoneal macrophages: poly(IC) versus Pam3Cys-Ser-(Lys)4 [PubChem=130704].	7	0.0479	8.07E-9	4.36E-6
GALINDO_IMMUNE_RESPONSE_TO_ENTEROTOXIN	85	Genes up-regulated in macrophages by aerolysin-related cytotoxic enterotoxin (Act) from Aeromonas hydrophila.	6	0.0706	9.72E-9	5.09E-6
NUYTTEN_NIPP1_TARGETS_UP	769	Genes up-regulated in PC3 cells (prostate cancer) after knockdown of NIPP1 [GeneID=5511] by RNAi.	12	0.0156	1.09E-8	5.55E-6
GO_INTRACELLULAR_SIGNAL_TRANSDUCTION	1572	The process in which a signal is passed on to downstream components within the cell, which become activated themselves to further propagate the signal and finally trigger a change in the function or state of the cell.	16	0.0102	1.34E-8	6.65E-6
MODULE_1	368	Ovary genes.	9	0.0245	1.93E-8	9.28E-6
GO_POSITIVE_REGULATION_OF_MULTICELLULAR_ORGANISMAL_PROCESS	1395	Any process that activates or increases the frequency, rate or extent of an organismal process, any of the processes pertinent to the function of an organism above the cellular level; includes the integrated processes of tissues and organs.	15	0.0108	1.98E-8	9.28E-6
GO_POSITIVE_REGULATION_OF_CELL_DIFFERENTIATION	823	Any process that activates or increases the frequency, rate or extent of cell differentiation.	12	0.0146	2.3E-8	1.05E-5
GSE6269_HEALTHY_VS_STAPH_AUREUS_INF_PBMC_UP	171	Genes up-regulated in comparison of peripheral blood mononuclear cells (PBMC) from patients with acute influenza infection versus PBMC from patients with acute S. aureus infection.	7	0.0409	2.41E-8	1.07E-5
AKT_UP.V1_UP	172	Genes up-regulated in mouse prostate by transgenic expression of human AKT1 gene [Gene ID=207] vs controls.	7	0.0407	2.51E-8	1.09E-5
GO_REGULATION_OF_CELL_DEATH	1472	Any process that modulates the rate or frequency of cell death. Cell death is the specific activation or halting of processes within a cell so that its vital functions markedly cease, rather than simply deteriorating gradually over time, which culminates in cell death.	15	0.0102	4E-8	1.7E-5
WATTEL_AUTONOMOUS_THYROID_ADENOMA_DN	55	Down-regulated genes characteristic for autonomous thyroid adenoma.	5	0.0909	4.87E-8	1.99E-5
STK33_SKM_UP	290	Genes up-regulated in SKM-1 cells (AML) after knockdown of STK33 [Gene ID=65975] by RNAi.	8	0.0276	4.93E-8	1.99E-5
NAGASHIMA_EGF_SIGNALING_UP	58	Genes up-regulated in MCF7 cells (breast cancer) after stimulation with EGF [GeneID=1950].	5	0.0862	6.39E-8	2.37E-5
PLASARI_TGFB1_TARGETS_10HR_UP	199	Genes up-regulated in MEF cells (embryonic fibroblast) upon stimulation with TGFB1 [GeneID=7040] for 10 h.	7	0.0352	6.81E-8	2.37E-5
GSE18281_CORTICAL_VS_MEDULLARY_THYMOCYTE_UP	200	Genes up-regulated in thymocytes: cortical versus medullary sources.	7	0.0350	7.05E-8	2.37E-5
GSE29618_BCELL_VS_PDC_UP	200	Genes up-regulated in comparison of B cells versus plasmacytoid dendritic cells (pDC) .	7	0.0350	7.05E-8	2.37E-5
GSE32986_CURDLAN_HIGHDOSE_VS_GMCSF_AND_CURDLAN_HIGHDOSE_STIM_DC_DN	200	Genes down-regulated in bone marrow-derived dendritic cells: high dose of 1,3-beta-D-oligoglucan [PubChem=11375554] versus CSF2 [GeneID=1437] and high dose of 1,3-beta-D-oligoglucan [PubChem=11375554].	7	0.0350	7.05E-8	2.37E-5
GSE34205_HEALTHY_VS_FLU_INF_INFANT_PBMC_DN	200	Genes down-regulated in comparison of peripheral blood mononuclear cells (PBMC) from healthy donors versus PBMCs from infanct with acute influenza infection.	7	0.0350	7.05E-8	2.37E-5
GSE41087_WT_VS_FOXP3_MUT_ANTI_CD3_CD28_STIM_CD4_TCELL_UP	200	Genes up-regulated in activated CD4 [GeneID=920] T cells expressing: wildtype versus mutant form of FOXP3 [GeneID=50943].	7	0.0350	7.05E-8	2.37E-5
GSE43955_TH0_VS_TGFB_IL6_TH17_ACT_CD4_TCELL_4H_UP	200	Genes up-regulated in CD4 [GeneID=920] T helper cells (4h): Th0 versus TGFB1 and IL6 [GeneID=7040;3569].	7	0.0350	7.05E-8	2.37E-5
GSE9988_LOW_LPS_VS_CTRL_TREATED_MONOCYTE_UP	200	Genes up-regulated in comparison of monocytes treated with 1 ng/ml LPS (TLR4 agonist) versus monocytes treated with control IgG.	7	0.0350	7.05E-8	2.37E-5
GO_RESPONSE_TO_ORGANIC_CYCLIC_COMPOUND	917	Any process that results in a change in state or activity of a cell or an organism (in terms of movement, secretion, enzyme production, gene expression, etc.) as a result of an organic cyclic compound stimulus.	12	0.0131	7.43E-8	2.45E-5
UROSEVIC_RESPONSE_TO_IMIQUIMOD	23	Interferon cluster genes up-regulated in skin tumors treated with imiquimod [PubChem=57469].	4	0.1739	7.73E-8	2.5E-5
MITSIADES_RESPONSE_TO_APLIDIN_UP	439	Genes up-regulated in the MM1S cells (multiple myeloma) after treatment with aplidin [PubChem=44152164], a marine-derived compound with potential anti-cancer properties.	9	0.0205	8.67E-8	2.76E-5
PHONG_TNF_TARGETS_UP	63	Genes up-regulated in Calu-6 cells (lung cancer) at 1 h time point after TNF [GeneID=7124] treatment.	5	0.0794	9.73E-8	3.04E-5
GO_POSITIVE_REGULATION_OF_DEVELOPMENTAL_PROCESS	1142	Any process that activates or increases the rate or extent of development, the biological process whose specific outcome is the progression of an organism over time from an initial condition (e.g. a zygote, or a young adult) to a later condition (e.g. a multicellular animal or an aged adult).	13	0.0114	1.01E-7	3.11E-5
KRIEG_HYPOXIA_NOT_VIA_KDM3A	770	Genes induced under hypoxia independently of KDM3A [GeneID=55818] in RCC4 cells (renal carcinoma) expressing VHL [GeneID=7428].	11	0.0143	1.14E-7	3.44E-5
GO_RESPONSE_TO_OXYGEN_CONTAINING_COMPOUND	1381	Any process that results in a change in state or activity of a cell or an organism (in terms of movement, secretion, enzyme production, gene expression, etc.) as a result of an oxygen-containing compound stimulus.	14	0.0101	1.28E-7	3.79E-5
FULCHER_INFLAMMATORY_RESPONSE_LECTIN_VS_LPS_DN	463	Genes down-regulated in monocyte-derived dendritic cells (MDDC) after stimulation with galecin-1 (lectin, LGALS1) [GeneID=3956] compared to that with bacterial lipopolysaccharide (LPS).	9	0.0194	1.36E-7	3.97E-5
GO_CIRCULATORY_SYSTEM_DEVELOPMENT	788	The process whose specific outcome is the progression of the circulatory system over time, from its formation to the mature structure. The circulatory system is the organ system that passes nutrients (such as amino acids and electrolytes), gases, hormones, blood cells, etc. to and from cells in the body to help fight diseases and help stabilize body temperature and pH to maintain homeostasis.	11	0.0140	1.43E-7	4.05E-5
GO_RESPONSE_TO_TYPE_I_INTERFERON	68	Any process that results in a change in state or activity of a cell or an organism (in terms of movement, secretion, enzyme production, gene expression, etc.) as a result of a type I interferon stimulus. Type I interferons include the interferon-alpha, beta, delta, episilon, zeta, kappa, tau, and omega gene families.	5	0.0735	1.43E-7	4.05E-5
PHONG_TNF_RESPONSE_NOT_VIA_P38	337	Genes whose expression changes in Calu-6 cells (lung cancer) by TNF [GeneID=7124] were not affected by p38 inhibitor LY479754.	8	0.0237	1.55E-7	4.33E-5
COULOUARN_TEMPORAL_TGFB1_SIGNATURE_DN	138	'Early-TGFB1 signature': genes overexpressed in primary hepatocytes at an early phase of TGFB1 [GeneID=7040] treatment; is associated with a less invasive phenotype.	6	0.0435	1.77E-7	4.86E-5
OSWALD_HEMATOPOIETIC_STEM_CELL_IN_COLLAGEN_GEL_UP	233	Genes up-regulated in hematopoietic stem cells (HSC, CD34+ [GeneID=947]) cultured in a three-dimentional collagen gel compared to the cells grown in suspension.	7	0.0300	1.99E-7	5.37E-5
SENESE_HDAC1_AND_HDAC2_TARGETS_UP	238	Genes up-regulated in U2OS cells (osteosarcoma) upon knockdown of both HDAC1 and HDAC2 [GeneID=3065;3066] by RNAi.	7	0.0294	2.3E-7	6.1E-5
BLALOCK_ALZHEIMERS_DISEASE_UP	1691	Genes up-regulated in brain from patients with Alzheimer's disease.	15	0.0089	2.39E-7	6.26E-5
GO_RESPONSE_TO_STEROID_HORMONE	497	Any process that results in a change in state or activity of a cell or an organism (in terms of movement, secretion, enzyme production, gene expression, etc.) as a result of a steroid hormone stimulus.	9	0.0181	2.47E-7	6.36E-5
DACOSTA_UV_RESPONSE_VIA_ERCC3_COMMON_UP	77	Common up-regulated transcripts in fibroblasts expressing either XP/CS or TDD mutant forms of ERCC3 [GeneID=2071], after UVC irradiation.	5	0.0649	2.68E-7	6.83E-5
GO_REGULATION_OF_PROTEIN_MODIFICATION_PROCESS	1710	Any process that modulates the frequency, rate or extent of the covalent alteration of one or more amino acid residues within a protein.	15	0.0088	2.76E-7	6.91E-5
BOSCO_INTERFERON_INDUCED_ANTIVIRAL_MODULE	78	Genes representing interferon-induced antiviral module in sputum during asthma exacerbations.	5	0.0641	2.86E-7	7.08E-5
GO_PHOSPHATE_CONTAINING_COMPOUND_METABOLIC_PROCESS	1977	The chemical reactions and pathways involving the phosphate group, the anion or salt of any phosphoric acid.	16	0.0081	3.07E-7	7.49E-5
MAHAJAN_RESPONSE_TO_IL1A_UP	81	Genes up-regulated in corneal fibroblasts after treatment with IL1A [GeneID=3552].	5	0.0617	3.46E-7	8.33E-5
SANA_TNF_SIGNALING_UP	83	Genes up-regulated in five primary endothelial cell types (lung, aortic, iliac, dermal, and colon) by TNF [GeneID=7124].	5	0.0602	3.91E-7	9.29E-5
PLASARI_TGFB1_TARGETS_1HR_UP	34	Genes up-regulated in MEF cells (embryonic fibroblast) upon stimulation with TGFB1 [GeneID=7040] for 1 h.	4	0.1176	3.99E-7	9.35E-5
CHYLA_CBFA2T3_TARGETS_UP	387	Genes up-regulated in immature bone marrow progenitor cells upon knock out of CBFA2T3 [GeneID=863].	8	0.0207	4.43E-7	1.02E-4
MEISSNER_NPC_HCP_WITH_H3_UNMETHYLATED	536	Genes with high-CpG-density promoters (HCP) that have no histone H3 methylation marks in neural precursor cells (NPC).	9	0.0168	4.63E-7	1.06E-4
GO_RESPONSE_TO_CYTOKINE	714	Any process that results in a change in state or activity of a cell or an organism (in terms of movement, secretion, enzyme production, gene expression, etc.) as a result of a cytokine stimulus.	10	0.0140	5.36E-7	1.2E-4
WEST_ADRENOCORTICAL_TUMOR_DN	546	Down-regulated genes in pediatric adrenocortical tumors (ACT) compared to the normal tissue.	9	0.0165	5.4E-7	1.2E-4
GO_POSITIVE_REGULATION_OF_PROTEIN_MODIFICATION_PROCESS	1135	Any process that activates or increases the frequency, rate or extent of the covalent alteration of one or more amino acid residues within a protein.	12	0.0106	7.17E-7	1.58E-4
GO_RIBONUCLEOTIDE_BINDING	1860	Interacting selectively and non-covalently with a ribonucleotide, any compound consisting of a ribonucleoside that is esterified with (ortho)phosphate or an oligophosphate at any hydroxyl group on the ribose moiety.	15	0.0081	7.95E-7	1.73E-4
GO_REGULATION_OF_PHOSPHORUS_METABOLIC_PROCESS	1618	Any process that modulates the frequency, rate or extent of the chemical reactions and pathways involving phosphorus or compounds containing phosphorus.	14	0.0087	8.53E-7	1.83E-4
TGTTTAC_MIR30A5P_MIR30C_MIR30D_MIR30B_MIR30E5P	579	Genes having at least one occurence of the motif TGTTTAC in their 3' untranslated region. The motif represents putative target (that is, seed match) of human mature miRNAs hsa-miR-30a-5p, hsa-miR-30c, hsa-miR-30d, hsa-miR-30b and hsa-miR-30e-5p (v7.1 miRBase).	9	0.0155	8.77E-7	1.86E-4
TAKEDA_TARGETS_OF_NUP98_HOXA9_FUSION_3D_UP	182	Genes up-regulated in CD34+ [GeneID=947] hematopoetic cells by expression of NUP98-HOXA9 fusion [GeneID=4928;3205] off a retroviral vector at 3 days after transduction.	6	0.0330	9.01E-7	1.89E-4
GO_ORGANIC_CYCLIC_COMPOUND_CATABOLIC_PROCESS	427	The chemical reactions and pathways resulting in the breakdown of organic cyclic compound.	8	0.0187	9.26E-7	1.9E-4
STK33_UP	293	Genes up-regulated in NOMO-1 and SKM-1 cells (AML) after knockdown of STK33 [Gene ID=65975] by RNAi.	7	0.0239	9.26E-7	1.9E-4
PEREZ_TP53_TARGETS	1174	Genes up-regulated in the HMEC cells (primary mammary epithelium) upon expression of TP53 [GeneID=7157] off adenoviral vector.	12	0.0102	1.02E-6	2.07E-4
MODULE_5	434	Lung genes.	8	0.0184	1.04E-6	2.09E-4
FARMER_BREAST_CANCER_CLUSTER_1	44	Cluster 1: interferon, T and B lymphocyte genes clustered together across breast cancer samples.	4	0.0909	1.15E-6	2.17E-4
GOZGIT_ESR1_TARGETS_DN	781	Genes down-regulated in TMX2-28 cells (breast cancer) which do not express ESR1 [GeneID=2099]) compared to the parental MCF7 cells which do.	10	0.0128	1.2E-6	2.17E-4
TGFB_UP.V1_UP	192	Genes up-regulated in a panel of epithelial cell lines by TGFB1 [Gene ID=7040].	6	0.0312	1.23E-6	2.17E-4
HORIUCHI_WTAP_TARGETS_UP	306	Genes up-regulated in primary endothelial cells (HUVEC) after knockdown of WTAP [GeneID=9589] by RNAi.	7	0.0229	1.24E-6	2.17E-4
KRAS.DF.V1_UP	193	Genes up-regulated in epithelial lung cancer cell lines over-expressing an oncogenic form of KRAS [Gene ID=3845] gene.	6	0.0311	1.27E-6	2.17E-4
RGAANNTTC_HSF1_01	446	Genes having at least one occurence of the highly conserved motif M68 RGAANNTTC sites. The motif matches transcription factor binding site V$HSF1_01 (v7.4 TRANSFAC).	8	0.0179	1.28E-6	2.17E-4
TAKEDA_TARGETS_OF_NUP98_HOXA9_FUSION_10D_UP	194	Genes up-regulated in CD34+ [GeneID=947] hematopoetic cells by expression of NUP98-HOXA9 fusion [GeneID=4928;3205] off a retroviral vector at 10 days after transduction.	6	0.0309	1.31E-6	2.17E-4
DACOSTA_UV_RESPONSE_VIA_ERCC3_UP	309	Genes up-regulated in fibroblasts expressing mutant forms of ERCC3 [GeneID=2071] after UV irradiation.	7	0.0227	1.32E-6	2.17E-4
AMIT_EGF_RESPONSE_60_HELA	46	Genes whose expression peaked at 60 min after stimulation of HeLa cells with EGF [GeneID=1950].	4	0.0870	1.38E-6	2.17E-4
GO_RESPONSE_TO_ENDOGENOUS_STIMULUS	1450	Any process that results in a change in state or activity of a cell or an organism (in terms of movement, secretion, enzyme production, gene expression, etc.) as a result of a stimulus arising within the organism.	13	0.0090	1.49E-6	2.17E-4
GSE42021_CD24HI_TREG_VS_CD24HI_TCONV_THYMUS_DN	199	Genes down-regulated in CD42 high [GeneID=100133941] cells from thymus: T reg versus T conv.	6	0.0302	1.51E-6	2.17E-4
Gene/Gene Set Overlap Matrix
Entrez Gene Id	Gene Symbol	Gene Description	RIGGI_EWING_SARCOMA_PROGENITOR_UP	NUYTTEN_EZH2_TARGETS_UP	GO_REGULATION_OF_INTRACELLULAR_SIGNAL_TRANSDUCTION	GSE43955_TH0_VS_TGFB_IL6_TH17_ACT_CD4_TCELL_1H_UP	GSE22886_CTRL_VS_LPS_24H_DC_DN	GSE2706_UNSTIM_VS_2H_LPS_AND_R848_DC_DN	GSE43957_UNTREATED_VS_NACL_TREATED_ANTI_CD3_CD28_STIM_CD4_TCELL_DN	GSE45365_NK_CELL_VS_CD11B_DC_DN	HALLMARK_TNFA_SIGNALING_VIA_NFKB	GRAESSMANN_APOPTOSIS_BY_DOXORUBICIN_UP	ZWANG_CLASS_3_TRANSIENTLY_INDUCED_BY_EGF	GO_CELLULAR_RESPONSE_TO_ORGANIC_SUBSTANCE	BURTON_ADIPOGENESIS_PEAK_AT_2HR	MEISSNER_BRAIN_HCP_WITH_H3K4ME3_AND_H3K27ME3	HELLER_HDAC_TARGETS_SILENCED_BY_METHYLATION_UP	ONDER_CDH1_TARGETS_2_DN	SCHUETZ_BREAST_CANCER_DUCTAL_INVASIVE_UP	NAGASHIMA_NRG1_SIGNALING_UP	GO_POSITIVE_REGULATION_OF_CELL_COMMUNICATION	AKT_UP_MTOR_DN.V1_UP	DUTERTRE_ESTRADIOL_RESPONSE_24HR_DN	LTE2_UP.V1_DN	MEK_UP.V1_DN	GSE26343_UNSTIM_VS_LPS_STIM_NFAT5_KO_MACROPHAGE_DN	GSE34392_ST2_KO_VS_WT_DAY8_LCMV_EFFECTOR_CD8_TCELL_DN	GSE45365_NK_CELL_VS_BCELL_UP	PEDRIOLI_MIR31_TARGETS_DN	GO_POSITIVE_REGULATION_OF_INTRACELLULAR_SIGNAL_TRANSDUCTION	DEBIASI_APOPTOSIS_BY_REOVIRUS_INFECTION_UP	WONG_ADULT_TISSUE_STEM_MODULE	GO_RESPONSE_TO_LIPID	GO_POSITIVE_REGULATION_OF_RESPONSE_TO_STIMULUS	GSE36891_POLYIC_TLR3_VS_PAM_TLR2_STIM_PERITONEAL_MACROPHAGE_UP	GALINDO_IMMUNE_RESPONSE_TO_ENTEROTOXIN	NUYTTEN_NIPP1_TARGETS_UP	GO_INTRACELLULAR_SIGNAL_TRANSDUCTION	MODULE_1	GO_POSITIVE_REGULATION_OF_MULTICELLULAR_ORGANISMAL_PROCESS	GO_POSITIVE_REGULATION_OF_CELL_DIFFERENTIATION	GSE6269_HEALTHY_VS_STAPH_AUREUS_INF_PBMC_UP	AKT_UP.V1_UP	GO_REGULATION_OF_CELL_DEATH	WATTEL_AUTONOMOUS_THYROID_ADENOMA_DN	STK33_SKM_UP	NAGASHIMA_EGF_SIGNALING_UP	PLASARI_TGFB1_TARGETS_10HR_UP	GSE18281_CORTICAL_VS_MEDULLARY_THYMOCYTE_UP
3383	ICAM1	intercellular adhesion molecule 1	RIGGI_EWING_SARCOMA_PROGENITOR_UP	NUYTTEN_EZH2_TARGETS_UP	GO_REGULATION_OF_INTRACELLULAR_SIGNAL_TRANSDUCTION		GSE22886_CTRL_VS_LPS_24H_DC_DN	GSE2706_UNSTIM_VS_2H_LPS_AND_R848_DC_DN	GSE43957_UNTREATED_VS_NACL_TREATED_ANTI_CD3_CD28_STIM_CD4_TCELL_DN	GSE45365_NK_CELL_VS_CD11B_DC_DN	HALLMARK_TNFA_SIGNALING_VIA_NFKB			GO_CELLULAR_RESPONSE_TO_ORGANIC_SUBSTANCE				ONDER_CDH1_TARGETS_2_DN			GO_POSITIVE_REGULATION_OF_CELL_COMMUNICATION					GSE26343_UNSTIM_VS_LPS_STIM_NFAT5_KO_MACROPHAGE_DN		GSE45365_NK_CELL_VS_BCELL_UP	PEDRIOLI_MIR31_TARGETS_DN	GO_POSITIVE_REGULATION_OF_INTRACELLULAR_SIGNAL_TRANSDUCTION		WONG_ADULT_TISSUE_STEM_MODULE	GO_RESPONSE_TO_LIPID	GO_POSITIVE_REGULATION_OF_RESPONSE_TO_STIMULUS		GALINDO_IMMUNE_RESPONSE_TO_ENTEROTOXIN				GO_POSITIVE_REGULATION_OF_MULTICELLULAR_ORGANISMAL_PROCESS				GO_REGULATION_OF_CELL_DEATH					GSE18281_CORTICAL_VS_MEDULLARY_THYMOCYTE_UP
9076	CLDN1	claudin 1	RIGGI_EWING_SARCOMA_PROGENITOR_UP	NUYTTEN_EZH2_TARGETS_UP		GSE43955_TH0_VS_TGFB_IL6_TH17_ACT_CD4_TCELL_1H_UP		GSE2706_UNSTIM_VS_2H_LPS_AND_R848_DC_DN					ZWANG_CLASS_3_TRANSIENTLY_INDUCED_BY_EGF					ONDER_CDH1_TARGETS_2_DN					DUTERTRE_ESTRADIOL_RESPONSE_24HR_DN														NUYTTEN_NIPP1_TARGETS_UP									STK33_SKM_UP
3280	HES1	hairy and enhancer of split 1, (Drosophila)	RIGGI_EWING_SARCOMA_PROGENITOR_UP		GO_REGULATION_OF_INTRACELLULAR_SIGNAL_TRANSDUCTION						HALLMARK_TNFA_SIGNALING_VIA_NFKB		ZWANG_CLASS_3_TRANSIENTLY_INDUCED_BY_EGF			MEISSNER_BRAIN_HCP_WITH_H3K4ME3_AND_H3K27ME3	HELLER_HDAC_TARGETS_SILENCED_BY_METHYLATION_UP	ONDER_CDH1_TARGETS_2_DN		NAGASHIMA_NRG1_SIGNALING_UP	GO_POSITIVE_REGULATION_OF_CELL_COMMUNICATION		DUTERTRE_ESTRADIOL_RESPONSE_24HR_DN	LTE2_UP.V1_DN						GO_POSITIVE_REGULATION_OF_INTRACELLULAR_SIGNAL_TRANSDUCTION				GO_POSITIVE_REGULATION_OF_RESPONSE_TO_STIMULUS				GO_INTRACELLULAR_SIGNAL_TRANSDUCTION	MODULE_1	GO_POSITIVE_REGULATION_OF_MULTICELLULAR_ORGANISMAL_PROCESS	GO_POSITIVE_REGULATION_OF_CELL_DIFFERENTIATION						NAGASHIMA_EGF_SIGNALING_UP
8817	FGF18	fibroblast growth factor 18	RIGGI_EWING_SARCOMA_PROGENITOR_UP		GO_REGULATION_OF_INTRACELLULAR_SIGNAL_TRANSDUCTION							GRAESSMANN_APOPTOSIS_BY_DOXORUBICIN_UP		GO_CELLULAR_RESPONSE_TO_ORGANIC_SUBSTANCE							GO_POSITIVE_REGULATION_OF_CELL_COMMUNICATION									GO_POSITIVE_REGULATION_OF_INTRACELLULAR_SIGNAL_TRANSDUCTION				GO_POSITIVE_REGULATION_OF_RESPONSE_TO_STIMULUS				GO_INTRACELLULAR_SIGNAL_TRANSDUCTION		GO_POSITIVE_REGULATION_OF_MULTICELLULAR_ORGANISMAL_PROCESS	GO_POSITIVE_REGULATION_OF_CELL_DIFFERENTIATION							PLASARI_TGFB1_TARGETS_10HR_UP
5997	RGS2	regulator of G-protein signaling 2, 24kDa	RIGGI_EWING_SARCOMA_PROGENITOR_UP		GO_REGULATION_OF_INTRACELLULAR_SIGNAL_TRANSDUCTION								ZWANG_CLASS_3_TRANSIENTLY_INDUCED_BY_EGF		BURTON_ADIPOGENESIS_PEAK_AT_2HR				SCHUETZ_BREAST_CANCER_DUCTAL_INVASIVE_UP	NAGASHIMA_NRG1_SIGNALING_UP								GSE45365_NK_CELL_VS_BCELL_UP				WONG_ADULT_TISSUE_STEM_MODULE			GSE36891_POLYIC_TLR3_VS_PAM_TLR2_STIM_PERITONEAL_MACROPHAGE_UP		NUYTTEN_NIPP1_TARGETS_UP		MODULE_1	GO_POSITIVE_REGULATION_OF_MULTICELLULAR_ORGANISMAL_PROCESS					WATTEL_AUTONOMOUS_THYROID_ADENOMA_DN	STK33_SKM_UP
8365	HIST1H4H	histone cluster 1, H4h	RIGGI_EWING_SARCOMA_PROGENITOR_UP				GSE22886_CTRL_VS_LPS_24H_DC_DN										HELLER_HDAC_TARGETS_SILENCED_BY_METHYLATION_UP					AKT_UP_MTOR_DN.V1_UP	DUTERTRE_ESTRADIOL_RESPONSE_24HR_DN	LTE2_UP.V1_DN	MEK_UP.V1_DN																		AKT_UP.V1_UP			STK33_SKM_UP
3017	HIST1H2BD	histone cluster 1, H2bd	RIGGI_EWING_SARCOMA_PROGENITOR_UP				GSE22886_CTRL_VS_LPS_24H_DC_DN																														NUYTTEN_NIPP1_TARGETS_UP						AKT_UP.V1_UP			STK33_SKM_UP
85477	SCIN	scinderin	RIGGI_EWING_SARCOMA_PROGENITOR_UP									GRAESSMANN_APOPTOSIS_BY_DOXORUBICIN_UP				MEISSNER_BRAIN_HCP_WITH_H3K4ME3_AND_H3K27ME3																								GO_POSITIVE_REGULATION_OF_MULTICELLULAR_ORGANISMAL_PROCESS	GO_POSITIVE_REGULATION_OF_CELL_DIFFERENTIATION			GO_REGULATION_OF_CELL_DEATH
27075	TSPAN13	tetraspanin 13	RIGGI_EWING_SARCOMA_PROGENITOR_UP									GRAESSMANN_APOPTOSIS_BY_DOXORUBICIN_UP					HELLER_HDAC_TARGETS_SILENCED_BY_METHYLATION_UP	ONDER_CDH1_TARGETS_2_DN
9508	ADAMTS3	ADAM metallopeptidase with thrombospondin type 1 motif, 3	RIGGI_EWING_SARCOMA_PROGENITOR_UP																		GO_POSITIVE_REGULATION_OF_CELL_COMMUNICATION													GO_POSITIVE_REGULATION_OF_RESPONSE_TO_STIMULUS
25849	PARM1	prostate androgen-regulated mucin-like protein 1	RIGGI_EWING_SARCOMA_PROGENITOR_UP																			AKT_UP_MTOR_DN.V1_UP																					AKT_UP.V1_UP						GSE18281_CORTICAL_VS_MEDULLARY_THYMOCYTE_UP
956	ENTPD3	ectonucleoside triphosphate diphosphohydrolase 3	RIGGI_EWING_SARCOMA_PROGENITOR_UP																				DUTERTRE_ESTRADIOL_RESPONSE_24HR_DN
4886	NPY1R	neuropeptide Y receptor Y1	RIGGI_EWING_SARCOMA_PROGENITOR_UP																					LTE2_UP.V1_DN	MEK_UP.V1_DN								GO_RESPONSE_TO_LIPID							GO_POSITIVE_REGULATION_OF_MULTICELLULAR_ORGANISMAL_PROCESS					WATTEL_AUTONOMOUS_THYROID_ADENOMA_DN
330	BIRC3	baculoviral IAP repeat containing 3		NUYTTEN_EZH2_TARGETS_UP	GO_REGULATION_OF_INTRACELLULAR_SIGNAL_TRANSDUCTION	GSE43955_TH0_VS_TGFB_IL6_TH17_ACT_CD4_TCELL_1H_UP	GSE22886_CTRL_VS_LPS_24H_DC_DN	GSE2706_UNSTIM_VS_2H_LPS_AND_R848_DC_DN		GSE45365_NK_CELL_VS_CD11B_DC_DN	HALLMARK_TNFA_SIGNALING_VIA_NFKB		ZWANG_CLASS_3_TRANSIENTLY_INDUCED_BY_EGF	GO_CELLULAR_RESPONSE_TO_ORGANIC_SUBSTANCE			HELLER_HDAC_TARGETS_SILENCED_BY_METHYLATION_UP	ONDER_CDH1_TARGETS_2_DN			GO_POSITIVE_REGULATION_OF_CELL_COMMUNICATION						GSE34392_ST2_KO_VS_WT_DAY8_LCMV_EFFECTOR_CD8_TCELL_DN	GSE45365_NK_CELL_VS_BCELL_UP	PEDRIOLI_MIR31_TARGETS_DN	GO_POSITIVE_REGULATION_OF_INTRACELLULAR_SIGNAL_TRANSDUCTION				GO_POSITIVE_REGULATION_OF_RESPONSE_TO_STIMULUS	GSE36891_POLYIC_TLR3_VS_PAM_TLR2_STIM_PERITONEAL_MACROPHAGE_UP		NUYTTEN_NIPP1_TARGETS_UP	GO_INTRACELLULAR_SIGNAL_TRANSDUCTION						GO_REGULATION_OF_CELL_DEATH
6288	SAA1	serum amyloid A1		NUYTTEN_EZH2_TARGETS_UP	GO_REGULATION_OF_INTRACELLULAR_SIGNAL_TRANSDUCTION	GSE43955_TH0_VS_TGFB_IL6_TH17_ACT_CD4_TCELL_1H_UP			GSE43957_UNTREATED_VS_NACL_TREATED_ANTI_CD3_CD28_STIM_CD4_TCELL_DN	GSE45365_NK_CELL_VS_CD11B_DC_DN											GO_POSITIVE_REGULATION_OF_CELL_COMMUNICATION	AKT_UP_MTOR_DN.V1_UP				GSE26343_UNSTIM_VS_LPS_STIM_NFAT5_KO_MACROPHAGE_DN	GSE34392_ST2_KO_VS_WT_DAY8_LCMV_EFFECTOR_CD8_TCELL_DN			GO_POSITIVE_REGULATION_OF_INTRACELLULAR_SIGNAL_TRANSDUCTION				GO_POSITIVE_REGULATION_OF_RESPONSE_TO_STIMULUS						GO_POSITIVE_REGULATION_OF_MULTICELLULAR_ORGANISMAL_PROCESS			AKT_UP.V1_UP						GSE18281_CORTICAL_VS_MEDULLARY_THYMOCYTE_UP
8877	SPHK1	sphingosine kinase 1		NUYTTEN_EZH2_TARGETS_UP	GO_REGULATION_OF_INTRACELLULAR_SIGNAL_TRANSDUCTION	GSE43955_TH0_VS_TGFB_IL6_TH17_ACT_CD4_TCELL_1H_UP			GSE43957_UNTREATED_VS_NACL_TREATED_ANTI_CD3_CD28_STIM_CD4_TCELL_DN		HALLMARK_TNFA_SIGNALING_VIA_NFKB			GO_CELLULAR_RESPONSE_TO_ORGANIC_SUBSTANCE					SCHUETZ_BREAST_CANCER_DUCTAL_INVASIVE_UP	NAGASHIMA_NRG1_SIGNALING_UP	GO_POSITIVE_REGULATION_OF_CELL_COMMUNICATION	AKT_UP_MTOR_DN.V1_UP								GO_POSITIVE_REGULATION_OF_INTRACELLULAR_SIGNAL_TRANSDUCTION			GO_RESPONSE_TO_LIPID	GO_POSITIVE_REGULATION_OF_RESPONSE_TO_STIMULUS				GO_INTRACELLULAR_SIGNAL_TRANSDUCTION		GO_POSITIVE_REGULATION_OF_MULTICELLULAR_ORGANISMAL_PROCESS	GO_POSITIVE_REGULATION_OF_CELL_DIFFERENTIATION		AKT_UP.V1_UP	GO_REGULATION_OF_CELL_DEATH				PLASARI_TGFB1_TARGETS_10HR_UP
1490	CTGF	connective tissue growth factor		NUYTTEN_EZH2_TARGETS_UP	GO_REGULATION_OF_INTRACELLULAR_SIGNAL_TRANSDUCTION									GO_CELLULAR_RESPONSE_TO_ORGANIC_SUBSTANCE	BURTON_ADIPOGENESIS_PEAK_AT_2HR	MEISSNER_BRAIN_HCP_WITH_H3K4ME3_AND_H3K27ME3			SCHUETZ_BREAST_CANCER_DUCTAL_INVASIVE_UP	NAGASHIMA_NRG1_SIGNALING_UP	GO_POSITIVE_REGULATION_OF_CELL_COMMUNICATION		DUTERTRE_ESTRADIOL_RESPONSE_24HR_DN							GO_POSITIVE_REGULATION_OF_INTRACELLULAR_SIGNAL_TRANSDUCTION	DEBIASI_APOPTOSIS_BY_REOVIRUS_INFECTION_UP	WONG_ADULT_TISSUE_STEM_MODULE	GO_RESPONSE_TO_LIPID	GO_POSITIVE_REGULATION_OF_RESPONSE_TO_STIMULUS			NUYTTEN_NIPP1_TARGETS_UP	GO_INTRACELLULAR_SIGNAL_TRANSDUCTION		GO_POSITIVE_REGULATION_OF_MULTICELLULAR_ORGANISMAL_PROCESS	GO_POSITIVE_REGULATION_OF_CELL_DIFFERENTIATION			GO_REGULATION_OF_CELL_DEATH	WATTEL_AUTONOMOUS_THYROID_ADENOMA_DN		NAGASHIMA_EGF_SIGNALING_UP	PLASARI_TGFB1_TARGETS_10HR_UP
51704	GPRC5B	G protein-coupled receptor, family C, group 5, member B		NUYTTEN_EZH2_TARGETS_UP	GO_REGULATION_OF_INTRACELLULAR_SIGNAL_TRANSDUCTION																GO_POSITIVE_REGULATION_OF_CELL_COMMUNICATION									GO_POSITIVE_REGULATION_OF_INTRACELLULAR_SIGNAL_TRANSDUCTION		WONG_ADULT_TISSUE_STEM_MODULE		GO_POSITIVE_REGULATION_OF_RESPONSE_TO_STIMULUS						GO_POSITIVE_REGULATION_OF_MULTICELLULAR_ORGANISMAL_PROCESS	GO_POSITIVE_REGULATION_OF_CELL_DIFFERENTIATION
25819	CCRN4L	CCR4 carbon catabolite repression 4-like (S. cerevisiae)		NUYTTEN_EZH2_TARGETS_UP		GSE43955_TH0_VS_TGFB_IL6_TH17_ACT_CD4_TCELL_1H_UP			GSE43957_UNTREATED_VS_NACL_TREATED_ANTI_CD3_CD28_STIM_CD4_TCELL_DN	GSE45365_NK_CELL_VS_CD11B_DC_DN		GRAESSMANN_APOPTOSIS_BY_DOXORUBICIN_UP																					GO_RESPONSE_TO_LIPID			GALINDO_IMMUNE_RESPONSE_TO_ENTEROTOXIN					GO_POSITIVE_REGULATION_OF_CELL_DIFFERENTIATION
571	BACH1	BTB and CNC homology 1, basic leucine zipper transcription factor 1		NUYTTEN_EZH2_TARGETS_UP		GSE43955_TH0_VS_TGFB_IL6_TH17_ACT_CD4_TCELL_1H_UP			GSE43957_UNTREATED_VS_NACL_TREATED_ANTI_CD3_CD28_STIM_CD4_TCELL_DN																			GSE45365_NK_CELL_VS_BCELL_UP			DEBIASI_APOPTOSIS_BY_REOVIRUS_INFECTION_UP	WONG_ADULT_TISSUE_STEM_MODULE
8638	OASL	2'-5'-oligoadenylate synthetase-like		NUYTTEN_EZH2_TARGETS_UP			GSE22886_CTRL_VS_LPS_24H_DC_DN	GSE2706_UNSTIM_VS_2H_LPS_AND_R848_DC_DN				GRAESSMANN_APOPTOSIS_BY_DOXORUBICIN_UP		GO_CELLULAR_RESPONSE_TO_ORGANIC_SUBSTANCE										LTE2_UP.V1_DN	MEK_UP.V1_DN						DEBIASI_APOPTOSIS_BY_REOVIRUS_INFECTION_UP						NUYTTEN_NIPP1_TARGETS_UP					GSE6269_HEALTHY_VS_STAPH_AUREUS_INF_PBMC_UP
3726	JUNB	jun B proto-oncogene		NUYTTEN_EZH2_TARGETS_UP				GSE2706_UNSTIM_VS_2H_LPS_AND_R848_DC_DN		GSE45365_NK_CELL_VS_CD11B_DC_DN	HALLMARK_TNFA_SIGNALING_VIA_NFKB	GRAESSMANN_APOPTOSIS_BY_DOXORUBICIN_UP	ZWANG_CLASS_3_TRANSIENTLY_INDUCED_BY_EGF	GO_CELLULAR_RESPONSE_TO_ORGANIC_SUBSTANCE	BURTON_ADIPOGENESIS_PEAK_AT_2HR					NAGASHIMA_NRG1_SIGNALING_UP		AKT_UP_MTOR_DN.V1_UP	DUTERTRE_ESTRADIOL_RESPONSE_24HR_DN			GSE26343_UNSTIM_VS_LPS_STIM_NFAT5_KO_MACROPHAGE_DN	GSE34392_ST2_KO_VS_WT_DAY8_LCMV_EFFECTOR_CD8_TCELL_DN	GSE45365_NK_CELL_VS_BCELL_UP				WONG_ADULT_TISSUE_STEM_MODULE	GO_RESPONSE_TO_LIPID		GSE36891_POLYIC_TLR3_VS_PAM_TLR2_STIM_PERITONEAL_MACROPHAGE_UP	GALINDO_IMMUNE_RESPONSE_TO_ENTEROTOXIN			MODULE_1		GO_POSITIVE_REGULATION_OF_CELL_DIFFERENTIATION			GO_REGULATION_OF_CELL_DEATH	WATTEL_AUTONOMOUS_THYROID_ADENOMA_DN	STK33_SKM_UP	NAGASHIMA_EGF_SIGNALING_UP	PLASARI_TGFB1_TARGETS_10HR_UP
9945	GFPT2	glutamine-fructose-6-phosphate transaminase 2		NUYTTEN_EZH2_TARGETS_UP							HALLMARK_TNFA_SIGNALING_VIA_NFKB								SCHUETZ_BREAST_CANCER_DUCTAL_INVASIVE_UP																				MODULE_1									PLASARI_TGFB1_TARGETS_10HR_UP
163732	CITED4	Cbp/p300-interacting transactivator, with Glu/Asp-rich carboxy-terminal domain, 4		NUYTTEN_EZH2_TARGETS_UP								GRAESSMANN_APOPTOSIS_BY_DOXORUBICIN_UP																					GO_RESPONSE_TO_LIPID
7980	TFPI2	tissue factor pathway inhibitor 2		NUYTTEN_EZH2_TARGETS_UP													HELLER_HDAC_TARGETS_SILENCED_BY_METHYLATION_UP	ONDER_CDH1_TARGETS_2_DN						LTE2_UP.V1_DN	MEK_UP.V1_DN				PEDRIOLI_MIR31_TARGETS_DN																	STK33_SKM_UP		PLASARI_TGFB1_TARGETS_10HR_UP
11082	ESM1	endothelial cell-specific molecule 1		NUYTTEN_EZH2_TARGETS_UP															SCHUETZ_BREAST_CANCER_DUCTAL_INVASIVE_UP		GO_POSITIVE_REGULATION_OF_CELL_COMMUNICATION													GO_POSITIVE_REGULATION_OF_RESPONSE_TO_STIMULUS
4314	MMP3	matrix metallopeptidase 3 (stromelysin 1, progelatinase)		NUYTTEN_EZH2_TARGETS_UP															SCHUETZ_BREAST_CANCER_DUCTAL_INVASIVE_UP															GO_POSITIVE_REGULATION_OF_RESPONSE_TO_STIMULUS	GSE36891_POLYIC_TLR3_VS_PAM_TLR2_STIM_PERITONEAL_MACROPHAGE_UP									GO_REGULATION_OF_CELL_DEATH
1843	DUSP1	dual specificity phosphatase 1			GO_REGULATION_OF_INTRACELLULAR_SIGNAL_TRANSDUCTION		GSE22886_CTRL_VS_LPS_24H_DC_DN	GSE2706_UNSTIM_VS_2H_LPS_AND_R848_DC_DN		GSE45365_NK_CELL_VS_CD11B_DC_DN	HALLMARK_TNFA_SIGNALING_VIA_NFKB		ZWANG_CLASS_3_TRANSIENTLY_INDUCED_BY_EGF	GO_CELLULAR_RESPONSE_TO_ORGANIC_SUBSTANCE	BURTON_ADIPOGENESIS_PEAK_AT_2HR		HELLER_HDAC_TARGETS_SILENCED_BY_METHYLATION_UP			NAGASHIMA_NRG1_SIGNALING_UP		AKT_UP_MTOR_DN.V1_UP	DUTERTRE_ESTRADIOL_RESPONSE_24HR_DN			GSE26343_UNSTIM_VS_LPS_STIM_NFAT5_KO_MACROPHAGE_DN	GSE34392_ST2_KO_VS_WT_DAY8_LCMV_EFFECTOR_CD8_TCELL_DN	GSE45365_NK_CELL_VS_BCELL_UP			DEBIASI_APOPTOSIS_BY_REOVIRUS_INFECTION_UP	WONG_ADULT_TISSUE_STEM_MODULE	GO_RESPONSE_TO_LIPID		GSE36891_POLYIC_TLR3_VS_PAM_TLR2_STIM_PERITONEAL_MACROPHAGE_UP	GALINDO_IMMUNE_RESPONSE_TO_ENTEROTOXIN	NUYTTEN_NIPP1_TARGETS_UP	GO_INTRACELLULAR_SIGNAL_TRANSDUCTION						GO_REGULATION_OF_CELL_DEATH	WATTEL_AUTONOMOUS_THYROID_ADENOMA_DN	STK33_SKM_UP	NAGASHIMA_EGF_SIGNALING_UP
2081	ERN1	endoplasmic reticulum to nucleus signaling 1			GO_REGULATION_OF_INTRACELLULAR_SIGNAL_TRANSDUCTION			GSE2706_UNSTIM_VS_2H_LPS_AND_R848_DC_DN						GO_CELLULAR_RESPONSE_TO_ORGANIC_SUBSTANCE							GO_POSITIVE_REGULATION_OF_CELL_COMMUNICATION									GO_POSITIVE_REGULATION_OF_INTRACELLULAR_SIGNAL_TRANSDUCTION				GO_POSITIVE_REGULATION_OF_RESPONSE_TO_STIMULUS				GO_INTRACELLULAR_SIGNAL_TRANSDUCTION
3791	KDR	kinase insert domain receptor (a type III receptor tyrosine kinase)			GO_REGULATION_OF_INTRACELLULAR_SIGNAL_TRANSDUCTION				GSE43957_UNTREATED_VS_NACL_TREATED_ANTI_CD3_CD28_STIM_CD4_TCELL_DN					GO_CELLULAR_RESPONSE_TO_ORGANIC_SUBSTANCE		MEISSNER_BRAIN_HCP_WITH_H3K4ME3_AND_H3K27ME3			SCHUETZ_BREAST_CANCER_DUCTAL_INVASIVE_UP		GO_POSITIVE_REGULATION_OF_CELL_COMMUNICATION					GSE26343_UNSTIM_VS_LPS_STIM_NFAT5_KO_MACROPHAGE_DN				GO_POSITIVE_REGULATION_OF_INTRACELLULAR_SIGNAL_TRANSDUCTION				GO_POSITIVE_REGULATION_OF_RESPONSE_TO_STIMULUS				GO_INTRACELLULAR_SIGNAL_TRANSDUCTION		GO_POSITIVE_REGULATION_OF_MULTICELLULAR_ORGANISMAL_PROCESS	GO_POSITIVE_REGULATION_OF_CELL_DIFFERENTIATION			GO_REGULATION_OF_CELL_DEATH
388	RHOB	ras homolog gene family, member B			GO_REGULATION_OF_INTRACELLULAR_SIGNAL_TRANSDUCTION						HALLMARK_TNFA_SIGNALING_VIA_NFKB				BURTON_ADIPOGENESIS_PEAK_AT_2HR		HELLER_HDAC_TARGETS_SILENCED_BY_METHYLATION_UP										GSE34392_ST2_KO_VS_WT_DAY8_LCMV_EFFECTOR_CD8_TCELL_DN					WONG_ADULT_TISSUE_STEM_MODULE			GSE36891_POLYIC_TLR3_VS_PAM_TLR2_STIM_PERITONEAL_MACROPHAGE_UP	GALINDO_IMMUNE_RESPONSE_TO_ENTEROTOXIN		GO_INTRACELLULAR_SIGNAL_TRANSDUCTION	MODULE_1	GO_POSITIVE_REGULATION_OF_MULTICELLULAR_ORGANISMAL_PROCESS		GSE6269_HEALTHY_VS_STAPH_AUREUS_INF_PBMC_UP		GO_REGULATION_OF_CELL_DEATH		STK33_SKM_UP
29984	RHOD	ras homolog gene family, member D			GO_REGULATION_OF_INTRACELLULAR_SIGNAL_TRANSDUCTION							GRAESSMANN_APOPTOSIS_BY_DOXORUBICIN_UP						ONDER_CDH1_TARGETS_2_DN										GSE45365_NK_CELL_VS_BCELL_UP										GO_INTRACELLULAR_SIGNAL_TRANSDUCTION
9641	IKBKE	inhibitor of kappa light polypeptide gene enhancer in B-cells, kinase epsilon			GO_REGULATION_OF_INTRACELLULAR_SIGNAL_TRANSDUCTION							GRAESSMANN_APOPTOSIS_BY_DOXORUBICIN_UP									GO_POSITIVE_REGULATION_OF_CELL_COMMUNICATION									GO_POSITIVE_REGULATION_OF_INTRACELLULAR_SIGNAL_TRANSDUCTION				GO_POSITIVE_REGULATION_OF_RESPONSE_TO_STIMULUS		GALINDO_IMMUNE_RESPONSE_TO_ENTEROTOXIN		GO_INTRACELLULAR_SIGNAL_TRANSDUCTION
91614	DEPDC7	DEP domain containing 7			GO_REGULATION_OF_INTRACELLULAR_SIGNAL_TRANSDUCTION							GRAESSMANN_APOPTOSIS_BY_DOXORUBICIN_UP																										GO_INTRACELLULAR_SIGNAL_TRANSDUCTION
6615	SNAI1	snail homolog 1 (Drosophila)			GO_REGULATION_OF_INTRACELLULAR_SIGNAL_TRANSDUCTION											MEISSNER_BRAIN_HCP_WITH_H3K4ME3_AND_H3K27ME3	HELLER_HDAC_TARGETS_SILENCED_BY_METHYLATION_UP																							GO_POSITIVE_REGULATION_OF_MULTICELLULAR_ORGANISMAL_PROCESS	GO_POSITIVE_REGULATION_OF_CELL_DIFFERENTIATION			GO_REGULATION_OF_CELL_DEATH				PLASARI_TGFB1_TARGETS_10HR_UP
8654	PDE5A	phosphodiesterase 5A, cGMP-specific			GO_REGULATION_OF_INTRACELLULAR_SIGNAL_TRANSDUCTION											MEISSNER_BRAIN_HCP_WITH_H3K4ME3_AND_H3K27ME3					GO_POSITIVE_REGULATION_OF_CELL_COMMUNICATION		DUTERTRE_ESTRADIOL_RESPONSE_24HR_DN							GO_POSITIVE_REGULATION_OF_INTRACELLULAR_SIGNAL_TRANSDUCTION				GO_POSITIVE_REGULATION_OF_RESPONSE_TO_STIMULUS						GO_POSITIVE_REGULATION_OF_MULTICELLULAR_ORGANISMAL_PROCESS	GO_POSITIVE_REGULATION_OF_CELL_DIFFERENTIATION
54602	NDFIP2	Nedd4 family interacting protein 2			GO_REGULATION_OF_INTRACELLULAR_SIGNAL_TRANSDUCTION																GO_POSITIVE_REGULATION_OF_CELL_COMMUNICATION									GO_POSITIVE_REGULATION_OF_INTRACELLULAR_SIGNAL_TRANSDUCTION				GO_POSITIVE_REGULATION_OF_RESPONSE_TO_STIMULUS
9023	CH25H	cholesterol 25-hydroxylase				GSE43955_TH0_VS_TGFB_IL6_TH17_ACT_CD4_TCELL_1H_UP			GSE43957_UNTREATED_VS_NACL_TREATED_ANTI_CD3_CD28_STIM_CD4_TCELL_DN	GSE45365_NK_CELL_VS_CD11B_DC_DN						MEISSNER_BRAIN_HCP_WITH_H3K4ME3_AND_H3K27ME3			SCHUETZ_BREAST_CANCER_DUCTAL_INVASIVE_UP									GSE45365_NK_CELL_VS_BCELL_UP																					GSE18281_CORTICAL_VS_MEDULLARY_THYMOCYTE_UP
9050	PSTPIP2	proline-serine-threonine phosphatase interacting protein 2				GSE43955_TH0_VS_TGFB_IL6_TH17_ACT_CD4_TCELL_1H_UP						GRAESSMANN_APOPTOSIS_BY_DOXORUBICIN_UP				MEISSNER_BRAIN_HCP_WITH_H3K4ME3_AND_H3K27ME3		ONDER_CDH1_TARGETS_2_DN								GSE26343_UNSTIM_VS_LPS_STIM_NFAT5_KO_MACROPHAGE_DN	GSE34392_ST2_KO_VS_WT_DAY8_LCMV_EFFECTOR_CD8_TCELL_DN
51655	RASD1	RAS, dexamethasone-induced 1				GSE43955_TH0_VS_TGFB_IL6_TH17_ACT_CD4_TCELL_1H_UP																AKT_UP_MTOR_DN.V1_UP	DUTERTRE_ESTRADIOL_RESPONSE_24HR_DN						PEDRIOLI_MIR31_TARGETS_DN			WONG_ADULT_TISSUE_STEM_MODULE						GO_INTRACELLULAR_SIGNAL_TRANSDUCTION											GSE18281_CORTICAL_VS_MEDULLARY_THYMOCYTE_UP
91543	RSAD2	radical S-adenosyl methionine domain containing 2					GSE22886_CTRL_VS_LPS_24H_DC_DN	GSE2706_UNSTIM_VS_2H_LPS_AND_R848_DC_DN				GRAESSMANN_APOPTOSIS_BY_DOXORUBICIN_UP		GO_CELLULAR_RESPONSE_TO_ORGANIC_SUBSTANCE							GO_POSITIVE_REGULATION_OF_CELL_COMMUNICATION						GSE34392_ST2_KO_VS_WT_DAY8_LCMV_EFFECTOR_CD8_TCELL_DN				DEBIASI_APOPTOSIS_BY_REOVIRUS_INFECTION_UP			GO_POSITIVE_REGULATION_OF_RESPONSE_TO_STIMULUS			NUYTTEN_NIPP1_TARGETS_UP			GO_POSITIVE_REGULATION_OF_MULTICELLULAR_ORGANISMAL_PROCESS		GSE6269_HEALTHY_VS_STAPH_AUREUS_INF_PBMC_UP							GSE18281_CORTICAL_VS_MEDULLARY_THYMOCYTE_UP
4939	OAS2	2'-5'-oligoadenylate synthetase 2, 69/71kDa					GSE22886_CTRL_VS_LPS_24H_DC_DN					GRAESSMANN_APOPTOSIS_BY_DOXORUBICIN_UP		GO_CELLULAR_RESPONSE_TO_ORGANIC_SUBSTANCE										LTE2_UP.V1_DN	MEK_UP.V1_DN						DEBIASI_APOPTOSIS_BY_REOVIRUS_INFECTION_UP						NUYTTEN_NIPP1_TARGETS_UP					GSE6269_HEALTHY_VS_STAPH_AUREUS_INF_PBMC_UP
2537	IFI6	interferon, alpha-inducible protein 6					GSE22886_CTRL_VS_LPS_24H_DC_DN							GO_CELLULAR_RESPONSE_TO_ORGANIC_SUBSTANCE			HELLER_HDAC_TARGETS_SILENCED_BY_METHYLATION_UP							LTE2_UP.V1_DN	MEK_UP.V1_DN						DEBIASI_APOPTOSIS_BY_REOVIRUS_INFECTION_UP						NUYTTEN_NIPP1_TARGETS_UP					GSE6269_HEALTHY_VS_STAPH_AUREUS_INF_PBMC_UP		GO_REGULATION_OF_CELL_DEATH
4929	NR4A2	nuclear receptor subfamily 4, group A, member 2						GSE2706_UNSTIM_VS_2H_LPS_AND_R848_DC_DN			HALLMARK_TNFA_SIGNALING_VIA_NFKB		ZWANG_CLASS_3_TRANSIENTLY_INDUCED_BY_EGF	GO_CELLULAR_RESPONSE_TO_ORGANIC_SUBSTANCE	BURTON_ADIPOGENESIS_PEAK_AT_2HR	MEISSNER_BRAIN_HCP_WITH_H3K4ME3_AND_H3K27ME3	HELLER_HDAC_TARGETS_SILENCED_BY_METHYLATION_UP			NAGASHIMA_NRG1_SIGNALING_UP						GSE26343_UNSTIM_VS_LPS_STIM_NFAT5_KO_MACROPHAGE_DN			PEDRIOLI_MIR31_TARGETS_DN		DEBIASI_APOPTOSIS_BY_REOVIRUS_INFECTION_UP	WONG_ADULT_TISSUE_STEM_MODULE	GO_RESPONSE_TO_LIPID		GSE36891_POLYIC_TLR3_VS_PAM_TLR2_STIM_PERITONEAL_MACROPHAGE_UP				MODULE_1					GO_REGULATION_OF_CELL_DEATH			NAGASHIMA_EGF_SIGNALING_UP
54491	FAM105A	family with sequence similarity 105, member A							GSE43957_UNTREATED_VS_NACL_TREATED_ANTI_CD3_CD28_STIM_CD4_TCELL_DN																				PEDRIOLI_MIR31_TARGETS_DN
5446	PON3	paraoxonase 3							GSE43957_UNTREATED_VS_NACL_TREATED_ANTI_CD3_CD28_STIM_CD4_TCELL_DN
56999	ADAMTS9	ADAM metallopeptidase with thrombospondin type 1 motif, 9								GSE45365_NK_CELL_VS_CD11B_DC_DN			ZWANG_CLASS_3_TRANSIENTLY_INDUCED_BY_EGF																PEDRIOLI_MIR31_TARGETS_DN												GO_POSITIVE_REGULATION_OF_CELL_DIFFERENTIATION
79887	PLBD1	phospholipase B domain containing 1								GSE45365_NK_CELL_VS_CD11B_DC_DN															MEK_UP.V1_DN
80004	ESRP2	epithelial splicing regulatory protein 2										GRAESSMANN_APOPTOSIS_BY_DOXORUBICIN_UP		GO_CELLULAR_RESPONSE_TO_ORGANIC_SUBSTANCE		MEISSNER_BRAIN_HCP_WITH_H3K4ME3_AND_H3K27ME3		ONDER_CDH1_TARGETS_2_DN
114569	MAL2	mal, T-cell differentiation protein 2 (gene/pseudogene)										GRAESSMANN_APOPTOSIS_BY_DOXORUBICIN_UP				MEISSNER_BRAIN_HCP_WITH_H3K4ME3_AND_H3K27ME3						AKT_UP_MTOR_DN.V1_UP																					AKT_UP.V1_UP
56605	ERO1LB	ERO1-like beta (S. cerevisiae)										GRAESSMANN_APOPTOSIS_BY_DOXORUBICIN_UP					HELLER_HDAC_TARGETS_SILENCED_BY_METHYLATION_UP																																GSE18281_CORTICAL_VS_MEDULLARY_THYMOCYTE_UP
389136	VGLL3	vestigial like 3 (Drosophila)											ZWANG_CLASS_3_TRANSIENTLY_INDUCED_BY_EGF
9429	ABCG2	ATP-binding cassette, sub-family G (WHITE), member 2												GO_CELLULAR_RESPONSE_TO_ORGANIC_SUBSTANCE				ONDER_CDH1_TARGETS_2_DN					DUTERTRE_ESTRADIOL_RESPONSE_24HR_DN						PEDRIOLI_MIR31_TARGETS_DN			WONG_ADULT_TISSUE_STEM_MODULE	GO_RESPONSE_TO_LIPID
1591	CYP24A1	cytochrome P450, family 24, subfamily A, polypeptide 1												GO_CELLULAR_RESPONSE_TO_ORGANIC_SUBSTANCE						NAGASHIMA_NRG1_SIGNALING_UP													GO_RESPONSE_TO_LIPID
3561	IL2RG	interleukin 2 receptor, gamma												GO_CELLULAR_RESPONSE_TO_ORGANIC_SUBSTANCE												GSE26343_UNSTIM_VS_LPS_STIM_NFAT5_KO_MACROPHAGE_DN	GSE34392_ST2_KO_VS_WT_DAY8_LCMV_EFFECTOR_CD8_TCELL_DN											GO_INTRACELLULAR_SIGNAL_TRANSDUCTION				GSE6269_HEALTHY_VS_STAPH_AUREUS_INF_PBMC_UP
64061	TSPYL2	TSPY-like 2												GO_CELLULAR_RESPONSE_TO_ORGANIC_SUBSTANCE																									MODULE_1
8549	LGR5	leucine-rich repeat containing G protein-coupled receptor 5														MEISSNER_BRAIN_HCP_WITH_H3K4ME3_AND_H3K27ME3					GO_POSITIVE_REGULATION_OF_CELL_COMMUNICATION											WONG_ADULT_TISSUE_STEM_MODULE		GO_POSITIVE_REGULATION_OF_RESPONSE_TO_STIMULUS
158158	RASEF	RAS and EF-hand domain containing														MEISSNER_BRAIN_HCP_WITH_H3K4ME3_AND_H3K27ME3							DUTERTRE_ESTRADIOL_RESPONSE_24HR_DN															GO_INTRACELLULAR_SIGNAL_TRANSDUCTION
1138	CHRNA5	cholinergic receptor, nicotinic, alpha 5														MEISSNER_BRAIN_HCP_WITH_H3K4ME3_AND_H3K27ME3
8701	DNAH11	dynein, axonemal, heavy chain 11														MEISSNER_BRAIN_HCP_WITH_H3K4ME3_AND_H3K27ME3
51599	LSR	lipolysis stimulated lipoprotein receptor																ONDER_CDH1_TARGETS_2_DN
9540	TP53I3	tumor protein p53 inducible protein 3																	SCHUETZ_BREAST_CANCER_DUCTAL_INVASIVE_UP																									GO_REGULATION_OF_CELL_DEATH
30008	EFEMP2	EGF containing fibulin-like extracellular matrix protein 2																	SCHUETZ_BREAST_CANCER_DUCTAL_INVASIVE_UP
4192	MDK	midkine (neurite growth-promoting factor 2)																						LTE2_UP.V1_DN									GO_RESPONSE_TO_LIPID						MODULE_1					GO_REGULATION_OF_CELL_DEATH
54332	GDAP1	ganglioside-induced differentiation-associated protein 1																							MEK_UP.V1_DN								GO_RESPONSE_TO_LIPID
283537	SLC46A3	solute carrier family 46, member 3																											PEDRIOLI_MIR31_TARGETS_DN								NUYTTEN_NIPP1_TARGETS_UP
162993	ZNF846	zinc finger protein 846																											PEDRIOLI_MIR31_TARGETS_DN
8341	HIST1H2BN	histone cluster 1, H2bn																													DEBIASI_APOPTOSIS_BY_REOVIRUS_INFECTION_UP						NUYTTEN_NIPP1_TARGETS_UP
8526	DGKE	diacylglycerol kinase, epsilon 64kDa																																				GO_INTRACELLULAR_SIGNAL_TRANSDUCTION
2162	F13A1	coagulation factor XIII, A1 polypeptide																																					MODULE_1
54955	C1orf109	chromosome 1 open reading frame 109																																								GSE6269_HEALTHY_VS_STAPH_AUREUS_INF_PBMC_UP
83853	ROPN1L	rhophilin associated tail protein 1-like																																									AKT_UP.V1_UP
124637	CYB5D1	cytochrome b5 domain containing 1
978	CDA	cytidine deaminase
152816	C4orf26	chromosome 4 open reading frame 26
84953	MICALCL	MICAL C-terminal like
117245	HRASLS5	HRAS-like suppressor family, member 5
388566	ZNF470	zinc finger protein 470
84527	ZNF559	zinc finger protein 559
90317	ZNF616	zinc finger protein 616
7568	ZNF20	zinc finger protein 20
[truncated: 53 more columns]

## Sheet: 468
Column1
Overlap Results
Collection(s):	C1, C2, C3, C4, C5, C6, C7, H
# overlaps shown:	100
# genesets in collections:	17810
# genes in comparison (n):	255
# genes in universe (N):	45956
Gene Set Name	# Genes in Gene Set (K)	Description	# Genes in Overlap (k)	k/K	p-value	FDR q-value
BUYTAERT_PHOTODYNAMIC_THERAPY_STRESS_UP	811	Genes up-regulated in T24 (bladder cancer) cells in response to the photodynamic therapy (PDT) stress.	46	0.0567	2.4e-32	4.27e-28
ZWANG_CLASS_1_TRANSIENTLY_INDUCED_BY_EGF	516	Class I of genes transiently induced by EGF [GeneID =1950] in 184A1 cells (mammary epithelium).	33	0.064	5.72e-25	5.1e-21
NUYTTEN_EZH2_TARGETS_UP	1037	Genes up-regulated in PC3 cells (prostate cancer) after knockdown of EZH2 [GeneID=2146] by RNAi.	41	0.0395	6.71e-23	3.98e-19
KOINUMA_TARGETS_OF_SMAD2_OR_SMAD3	824	Genes with promoters occupied by SMAD2 or SMAD3 [GeneID=4087, 4088] in HaCaT cells (keratinocyte) according to a ChIP-chip analysis.	36	0.0437	1.36e-21	6.06e-18
PASINI_SUZ12_TARGETS_DN	315	Genes down-regulated in ES (embryonic stem cells) with defficient SUZ12 [GeneID=23512].	25	0.0794	2.06e-21	7.32e-18
CHARAFE_BREAST_CANCER_LUMINAL_VS_BASAL_DN	455	Genes down-regulated in luminal-like breast cancer cell lines compared to the basal-like ones.	28	0.0615	7.16e-21	2.12e-17
GEORGES_TARGETS_OF_MIR192_AND_MIR215	893	Genes down-regulated in HCT116 cells (colon cancer) by expression of MIR192 or MIR215 [GeneID=406967;406997] at 24 h.	36	0.0403	1.89e-20	4.8e-17
DUTERTRE_ESTRADIOL_RESPONSE_24HR_DN	505	Genes down-regulated in MCF7 cells (breast cancer) at 24 h of estradiol [PubChem=5757] treatment.	28	0.0554	1.14e-19	2.53e-16
CHARAFE_BREAST_CANCER_LUMINAL_VS_MESENCHYMAL_DN	460	Genes down-regulated in luminal-like breast cancer cell lines compared to the mesenchymal-like ones.	26	0.0565	1.52e-18	3.01e-15
WONG_ADULT_TISSUE_STEM_MODULE	721	The 'adult tissue stem' module: genes coordinately up-regulated in a compendium of adult tissue stem cells.	30	0.0416	1.49e-17	2.66e-14
HUANG_DASATINIB_RESISTANCE_UP	81	Genes whose expression positively correlated with sensitivity of breast cancer cell lines to dasatinib [PubChem=3062316].	14	0.1728	2.4e-17	3.88e-14
GO_REGULATION_OF_INTRACELLULAR_SIGNAL_TRANSDUCTION	1656	Any process that modulates the frequency, rate or extent of intracellular signal transduction.	43	0.026	3.64e-17	5.4e-14
CUI_TCF21_TARGETS_2_DN	830	All significantly down-regulated genes in kidney glomeruli isolated from TCF21 [Gene ID=6943] knockout mice.	31	0.0373	8.41e-17	1.15e-13
KRIGE_RESPONSE_TO_TOSEDOSTAT_24HR_UP	783	Genes up-regulated in HL-60 cells (acute promyelocytic leukemia, APL) after treatment with the aminopeptidase inhibitor tosedostat (CHR-2797) [PubChem=15547703] for 24 h.	30	0.0383	1.38e-16	1.76e-13
GO_CELLULAR_RESPONSE_TO_STRESS	1565	Any process that results in a change in state or activity of a cell (in terms of movement, secretion, enzyme production, gene expression, etc.) as a result of a stimulus indicating the organism is under stress. The stress is usually, but not necessarily, exogenous (e.g. temperature, humidity, ionizing radiation).	41	0.0262	1.6e-16	1.89e-13
GO_NEGATIVE_REGULATION_OF_RESPONSE_TO_STIMULUS	1360	Any process that stops, prevents, or reduces the frequency, rate or extent of a response to a stimulus. Response to stimulus is a change in state or activity of a cell or an organism (in terms of movement, secretion, enzyme production, gene expression, etc.) as a result of a stimulus.	38	0.0279	2.97e-16	3.31e-13
MITSIADES_RESPONSE_TO_APLIDIN_UP	439	Genes up-regulated in the MM1S cells (multiple myeloma) after treatment with aplidin [PubChem=44152164], a marine-derived compound with potential anti-cancer properties.	23	0.0524	8.04e-16	8.43e-13
GO_INTRACELLULAR_SIGNAL_TRANSDUCTION	1572	The process in which a signal is passed on to downstream components within the cell, which become activated themselves to further propagate the signal and finally trigger a change in the function or state of the cell.	40	0.0254	1.03e-15	1.02e-12
REACTOME_GENERIC_TRANSCRIPTION_PATHWAY	352	Genes involved in Generic Transcription Pathway	21	0.0597	1.16e-15	1.09e-12
ZWANG_TRANSIENTLY_UP_BY_1ST_EGF_PULSE_ONLY	1839	Genes transiently induced only by the first pulse of EGF [GeneID =1950] in 184A1 cells (mammary epithelium).	43	0.0234	1.48e-15	1.32e-12
GO_TISSUE_DEVELOPMENT	1518	The process whose specific outcome is the progression of a tissue over time, from its formation to the mature structure.	39	0.0257	1.79e-15	1.52e-12
HALLMARK_TNFA_SIGNALING_VIA_NFKB	200	Genes regulated by NF-kB in response to TNF [GeneID=7124].	17	0.085	1.94e-15	1.57e-12
CONCANNON_APOPTOSIS_BY_EPOXOMICIN_UP	239	Genes up-regulated in SH-SY5Y cells (neuroblastoma) after treatment with epoxomicin [PubChem=3035402], a protease inhibitor causing apoptosis.	18	0.0753	2.4e-15	1.86e-12
NAGASHIMA_NRG1_SIGNALING_UP	176	Genes up-regulated in MCF7 cells (breast cancer) after stimulation with NRG1 [GeneID=3084].	16	0.0909	4.58e-15	3.4e-12
GO_REGULATION_OF_CELLULAR_COMPONENT_MOVEMENT	771	Any process that modulates the frequency, rate or extent of the movement of a cellular component.	28	0.0363	5.74e-15	4.09e-12
ZWANG_CLASS_3_TRANSIENTLY_INDUCED_BY_EGF	222	Class III of genes transiently induced by EGF [GeneID =1950] in 184A1 cells (mammary epithelium).	17	0.0766	1.1e-14	7.32e-12
BILD_HRAS_ONCOGENIC_SIGNATURE	261	Genes selected in supervised analyses to discriminate cells expressing activated HRAS [GeneID=3265] oncogene from control cells expressing GFP.	18	0.069	1.11e-14	7.32e-12
GRAESSMANN_APOPTOSIS_BY_DOXORUBICIN_UP	1142	Genes up-regulated in ME-A cells (breast cancer) undergoing apoptosis in response to doxorubicin [PubChem=31703].	33	0.0289	1.26e-14	7.99e-12
GO_REGULATION_OF_PHOSPHORUS_METABOLIC_PROCESS	1618	Any process that modulates the frequency, rate or extent of the chemical reactions and pathways involving phosphorus or compounds containing phosphorus.	39	0.0241	1.39e-14	8.52e-12
GO_REGULATION_OF_PROTEIN_MODIFICATION_PROCESS	1710	Any process that modulates the frequency, rate or extent of the covalent alteration of one or more amino acid residues within a protein.	40	0.0234	1.62e-14	9.6e-12
EGFR_UP.V1_UP	193	Genes up-regulated in MCF-7 cells (breast cancer) positive for ESR1 [Gene ID=2099] and engineered to express ligand-activatable EGFR [Gene ID=1956].	16	0.0829	1.96e-14	1.11e-11
GO_REGULATION_OF_CELL_DEATH	1472	Any process that modulates the rate or frequency of cell death. Cell death is the specific activation or halting of processes within a cell so that its vital functions markedly cease, rather than simply deteriorating gradually over time, which culminates in cell death.	37	0.0251	2e-14	1.11e-11
LEE_BMP2_TARGETS_DN	882	Genes down-regulated in uterus upon knockout of BMP2 [GeneID=650].	29	0.0329	2.28e-14	1.23e-11
KRIGE_RESPONSE_TO_TOSEDOSTAT_6HR_UP	953	Genes up-regulated in HL-60 cells (acute promyelocytic leukemia, APL) after treatment with the aminopeptidase inhibitor tosedostat (CHR-2797) [PubChem=15547703] for 6 h.	30	0.0315	2.45e-14	1.28e-11
GO_RESPONSE_TO_EXTERNAL_STIMULUS	1821	Any process that results in a change in state or activity of a cell or an organism (in terms of movement, secretion, enzyme production, gene expression, etc.) as a result of an external stimulus.	41	0.0225	2.57e-14	1.31e-11
KOBAYASHI_EGFR_SIGNALING_6HR_DN	18	Genes down-regulated in H1975 cells (non-small cell lung cancer, NSCLC) resistant to gefitinib [PubChem=123631] after treatment with EGFR inhibitor CL-387785 [PubChem=2776] for 6h.	8	0.4444	3.36e-14	1.61e-11
GSE9988_LOW_LPS_VS_CTRL_TREATED_MONOCYTE_UP	200	Genes up-regulated in comparison of monocytes treated with 1 ng/ml LPS (TLR4 agonist) versus monocytes treated with control IgG.	16	0.08	3.43e-14	1.61e-11
GSE9988_LOW_LPS_VS_VEHICLE_TREATED_MONOCYTE_UP	200	Genes up-regulated in comparison of monocytes treated with 1 ng/ml LPS (TLR4 agonist) versus untreated monocytes.	16	0.08	3.43e-14	1.61e-11
GO_REGULATION_OF_MULTICELLULAR_ORGANISMAL_DEVELOPMENT	1672	Any process that modulates the frequency, rate or extent of multicellular organismal development.	39	0.0233	3.92e-14	1.79e-11
GO_NEGATIVE_REGULATION_OF_CELL_COMMUNICATION	1192	Any process that decreases the frequency, rate or extent of cell communication. Cell communication is the process that mediates interactions between a cell and its surroundings. Encompasses interactions such as signaling or attachment between one cell and another cell, between a cell and an extracellular matrix, or between a cell and any other aspect of its environment.	33	0.0277	4.14e-14	1.85e-11
WINTER_HYPOXIA_METAGENE	242	Genes regulated by hypoxia, based on literature searches.	17	0.0702	4.57e-14	1.99e-11
GO_NUCLEIC_ACID_BINDING_TRANSCRIPTION_FACTOR_ACTIVITY	1199	Interacting selectively and non-covalently with a DNA or RNA sequence in order to modulate transcription. The transcription factor may or may not also interact selectively with a protein or macromolecular complex.	33	0.0275	4.87e-14	2.07e-11
GO_POSITIVE_REGULATION_OF_CELL_COMMUNICATION	1532	Any process that increases the frequency, rate or extent of cell communication. Cell communication is the process that mediates interactions between a cell and its surroundings. Encompasses interactions such as signaling or attachment between one cell and another cell, between a cell and an extracellular matrix, or between a cell and any other aspect of its environment.	37	0.0242	6.7e-14	2.78e-11
GO_EPITHELIUM_DEVELOPMENT	945	The process whose specific outcome is the progression of an epithelium over time, from its formation to the mature structure. An epithelium is a tissue that covers the internal or external surfaces of an anatomical structure.	29	0.0307	1.29e-13	5.2e-11
ENK_UV_RESPONSE_EPIDERMIS_DN	508	Genes down-regulated in epidermis after to UVB irradiation.	22	0.0433	1.65e-13	6.52e-11
GO_POSITIVE_REGULATION_OF_RESPONSE_TO_STIMULUS	1929	Any process that activates, maintains or increases the rate of a response to a stimulus. Response to stimulus is a change in state or activity of a cell or an organism (in terms of movement, secretion, enzyme production, gene expression, etc.) as a result of a stimulus.	41	0.0213	1.68e-13	6.52e-11
WANG_METHYLATED_IN_BREAST_CANCER	35	Genes up-regulated in MDA468 cells (breast cancer) vs DU99 cells (normal breast) after treatment with azacytidine [PubChem=9444].	9	0.2571	2.69e-13	1e-10
BLALOCK_ALZHEIMERS_DISEASE_UP	1691	Genes up-regulated in brain from patients with Alzheimer's disease.	38	0.0225	2.7e-13	1e-10
KINSEY_TARGETS_OF_EWSR1_FLII_FUSION_UP	1278	Genes up-regulated in TC71 and EWS502 cells (Ewing's sarcoma) by EWSR1-FLI1 [GeneID=2130;2314] as inferred from RNAi knockdown of this fusion protein.	33	0.0258	2.82e-13	1.02e-10
NUYTTEN_NIPP1_TARGETS_DN	848	Genes down-regulated in PC3 cells (prostate cancer) after knockdown of NIPP1 [GeneID=5511] by RNAi.	27	0.0318	4.02e-13	1.43e-10
LTE2_UP.V1_DN	196	Genes down-regulated in MCF-7 cells (breast cancer) positive for ESR1 [Gene ID=2099] MCF-7 cells (breast cancer) and long-term adapted for estrogen-independent growth.	15	0.0765	4.21e-13	1.47e-10
FORTSCHEGGER_PHF8_TARGETS_DN	784	Genes down-regulated in HeLa cells (cervical carcinoma) upon knockdown of PHF8 [GeneID=23133] by RNAi.	26	0.0332	4.48e-13	1.51e-10
GO_RESPONSE_TO_OXYGEN_CONTAINING_COMPOUND	1381	Any process that results in a change in state or activity of a cell or an organism (in terms of movement, secretion, enzyme production, gene expression, etc.) as a result of an oxygen-containing compound stimulus.	34	0.0246	4.5e-13	1.51e-10
GSE2706_UNSTIM_VS_8H_LPS_AND_R848_DC_DN	200	Genes down-regulated in comparison of unstimulated dendritic cells (DC) at 0 h versus DCs stimulated with LPS (TLR4 agonist) and R848 for 8 h.	15	0.075	5.65e-13	1.74e-10
GSE9988_ANTI_TREM1_AND_LPS_VS_CTRL_TREATED_MONOCYTES_UP	200	Genes up-regulated in comparison of monocytes treated with anti-TREM1 [GeneID=54210] and 5000 ng/ml LPS (TLR4 agonist) versus monocytes treated with control IgG.	15	0.075	5.65e-13	1.74e-10
GSE9988_LPS_VS_CTRL_TREATED_MONOCYTE_UP	200	Genes up-regulated in comparison of monocytes treated with 5000 ng/ml LPS (TLR4 agonist) versus monocytes treated with control IgG.	15	0.075	5.65e-13	1.74e-10
GSE9988_LPS_VS_VEHICLE_TREATED_MONOCYTE_UP	200	Genes up-regulated in comparison of monocytes treated with 1 ng/ml LPS (TLR4 agonist) versus untreated monocytes.	15	0.075	5.65e-13	1.74e-10
GO_POSITIVE_REGULATION_OF_GENE_EXPRESSION	1733	Any process that increases the frequency, rate or extent of gene expression. Gene expression is the process in which a gene's coding sequence is converted into a mature gene product or products (proteins or RNA). This includes the production of an RNA transcript as well as any processing to produce a mature RNA product or an mRNA (for protein-coding genes) and the translation of that mRNA into pr…	38	0.0219	5.68e-13	1.74e-10
GO_POSITIVE_REGULATION_OF_MULTICELLULAR_ORGANISMAL_PROCESS	1395	Any process that activates or increases the frequency, rate or extent of an organismal process, any of the processes pertinent to the function of an organism above the cellular level; includes the integrated processes of tissues and organs.	34	0.0244	5.96e-13	1.8e-10
GO_POSITIVE_REGULATION_OF_INTRACELLULAR_SIGNAL_TRANSDUCTION	876	Any process that activates or increases the frequency, rate or extent of intracellular signal transduction.	27	0.0308	8.55e-13	2.54e-10
GO_FORMATION_OF_PRIMARY_GERM_LAYER	110	The formation of the ectoderm, mesoderm and endoderm during gastrulation.	12	0.1091	1.43e-12	4.17e-10
PILON_KLF1_TARGETS_DN	1972	Genes down-regulated in erythroid progenitor cells from fetal livers of E13.5 embryos with KLF1 [GeneID=10661] knockout compared to those from the wild type embryos.	40	0.0203	1.49e-12	4.29e-10
RUIZ_TNC_TARGETS_DN	142	Genes down-regulated in T98G cells (glioblastoma) by TNC [GeneID=3371].	13	0.0915	1.6e-12	4.53e-10
BMI1_DN_MEL18_DN.V1_UP	145	Genes up-regulated in DAOY cells (medulloblastoma) upon knockdown of BMI1 and PCGF2 [Gene ID=648, 7703] genes by RNAi.	13	0.0897	2.1e-12	5.74e-10
HELLER_HDAC_TARGETS_SILENCED_BY_METHYLATION_UP	461	Genes up-regulated in multiple myeloma (MM) cell lines treated with both decitabine [PubChem=451668] TSA [PubChem=5562].	20	0.0434	2.1e-12	5.74e-10
MASSARWEH_TAMOXIFEN_RESISTANCE_UP	578	Genes up-regulated in breast cancer tumors (formed by MCF-7 xenografts) resistant to tamoxifen [PubChem=5376].	22	0.0381	2.13e-12	5.74e-10
ONDER_CDH1_TARGETS_2_DN	464	Genes down-regulated in HMLE cells (immortalized nontransformed mammary epithelium) after E-cadhedrin (CDH1) [GeneID=999] knockdown by RNAi.	20	0.0431	2.36e-12	6.18e-10
GO_POSITIVE_REGULATION_OF_DEVELOPMENTAL_PROCESS	1142	Any process that activates or increases the rate or extent of development, the biological process whose specific outcome is the progression of an organism over time from an initial condition (e.g. a zygote, or a young adult) to a later condition (e.g. a multicellular animal or an aged adult).	30	0.0263	2.42e-12	6.18e-10
GO_REGULATION_OF_KINASE_ACTIVITY	776	Any process that modulates the frequency, rate or extent of kinase activity, the catalysis of the transfer of a phosphate group, usually from ATP, to a substrate molecule.	25	0.0322	2.42e-12	6.18e-10
GO_REGULATION_OF_RESPONSE_TO_STRESS	1468	Any process that modulates the frequency, rate or extent of a response to stress. Response to stress is a change in state or activity of a cell or an organism (in terms of movement, secretion, enzyme production, gene expression, etc.) as a result of a disturbance in organismal or cellular homeostasis, usually, but not necessarily, exogenous (e.g. temperature, humidity, ionizing radiation).	34	0.0232	2.43e-12	6.18e-10
CHEN_HOXA5_TARGETS_9HR_UP	223	Genes up-regulated 9 h after induction of HoxA5 [GeneID=3205] expression in a breast cancer cell line.	15	0.0673	2.74e-12	6.86e-10
WU_CELL_MIGRATION	184	Genes associated with migration rate of 40 human bladder cancer cells.	14	0.0761	2.79e-12	6.91e-10
GO_REGULATION_OF_PROTEIN_SERINE_THREONINE_KINASE_ACTIVITY	470	Any process that modulates the rate, frequency, or extent of protein serine/threonine kinase activity.	20	0.0426	2.99e-12	7.28e-10
DEBIASI_APOPTOSIS_BY_REOVIRUS_INFECTION_UP	314	Genes up-regulated in HEK293 cells (embryonic kidney) at 6 h, 12 h or 24 h after infection with reovirus strain T3A (known as a strong inducer of apoptosis).	17	0.0541	3.08e-12	7.4e-10
RODRIGUES_THYROID_CARCINOMA_ANAPLASTIC_UP	722	Genes up-regulated in anaplastic thyroid carcinoma (ATC) compared to normal thyroid tissue.	24	0.0332	3.54e-12	8.41e-10
GO_REGULATION_OF_CELL_DIFFERENTIATION	1492	Any process that modulates the frequency, rate or extent of cell differentiation, the process in which relatively unspecialized cells acquire specialized structural and functional features.	34	0.0228	3.78e-12	8.8e-10
MODULE_1	368	Ovary genes.	18	0.0489	3.8e-12	8.8e-10
GO_GASTRULATION	155	A complex and coordinated series of cellular movements that occurs at the end of cleavage during embryonic development of most animals. The details of gastrulation vary from species to species, but usually result in the formation of the three primary germ layers, ectoderm, mesoderm and endoderm.	13	0.0839	4.94e-12	1.13e-09
GO_RESPONSE_TO_ABIOTIC_STIMULUS	1024	Any process that results in a change in state or activity of a cell or an organism (in terms of movement, secretion, enzyme production, gene expression, etc.) as a result of an abiotic (non-living) stimulus.	28	0.0273	5.38e-12	1.21e-09
CTTTGT_LEF1_Q2	1972	Genes having at least one occurence of the highly conserved motif M13 CTTTGT sites. The motif matches transcription factor binding site V$LEF1_Q2 (v7.4 TRANSFAC).	39	0.0198	6.31e-12	1.41e-09
GO_NEGATIVE_REGULATION_OF_INTRACELLULAR_SIGNAL_TRANSDUCTION	437	Any process that stops, prevents or reduces the frequency, rate or extent of intracellular signal transduction.	19	0.0435	7.33e-12	1.61e-09
UDAYAKUMAR_MED1_TARGETS_DN	240	Genes down-regulated in HeLa cells after knockdown of MED1 [GeneID=5469] by RNAi.	15	0.0625	7.85e-12	1.7e-09
MODULE_3	385	Genes in the cancer module 3.	18	0.0468	8.04e-12	1.72e-09
GSE1460_INTRATHYMIC_T_PROGENITOR_VS_THYMIC_STROMAL_CELL_DN	200	Genes down-regulated in comparison of intrathymic T progenitor cells (ITTP) versus thymic stromal cells.	14	0.07	8.65e-12	1.79e-09
GSE34392_ST2_KO_VS_WT_DAY8_LCMV_EFFECTOR_CD8_TCELL_DN	200	Genes down-regulated in P14 CD8+ T cells: ST2 [GeneID=6761] knockout versus wildtype.	14	0.07	8.65e-12	1.79e-09
GSE9988_ANTI_TREM1_VS_CTRL_TREATED_MONOCYTES_UP	200	Genes up-regulated in comparison of monocytes treated with anti-TREM1 [GeneID=54210] versus monocytes treated with control IgG.	14	0.07	8.65e-12	1.79e-09
KEGG_FOCAL_ADHESION	201	Focal adhesion	14	0.0697	9.26e-12	1.88e-09
DELYS_THYROID_CANCER_UP	443	Genes up-regulated in papillary thyroid carcinoma (PTC) compared to normal tissue.	19	0.0429	9.27e-12	1.88e-09
GO_REGULATION_OF_CELL_ADHESION	629	Any process that modulates the frequency, rate or extent of attachment of a cell to another cell or to the extracellular matrix.	22	0.035	1.1e-11	2.2e-09
KOBAYASHI_EGFR_SIGNALING_24HR_DN	251	Genes down-regulated in H1975 cells (non-small cell lung cancer, NSCLC) resistant to gefitinib [PubChem=123631] after treatment with EGFR inhibitor CL-387785 [PubChem=2776] for 24h.	15	0.0598	1.49e-11	2.94e-09
SENESE_HDAC1_TARGETS_UP	457	Genes up-regulated in U2OS cells (osteosarcoma) upon knockdown of HDAC1 [GeneID=3065] by RNAi.	19	0.0416	1.58e-11	3.1e-09
SUBTIL_PROGESTIN_TARGETS	36	Genes responding to progestin R5020 [PubChem=36709] treatment of T47D-MTVL cells (breast cancer).	8	0.2222	2.13e-11	4.12e-09
GO_NEGATIVE_REGULATION_OF_PROTEIN_METABOLIC_PROCESS	1087	Any process that stops, prevents, or reduces the frequency, rate or extent of chemical reactions and pathways involving a protein.	28	0.0258	2.16e-11	4.13e-09
TTGTTT_FOXO4_01	2061	Genes having at least one occurence of the highly conserved motif M60 TTGTTT sites. The motif matches transcription factor binding site V$FOXO4_01 (v7.4 TRANSFAC).	39	0.0189	2.35e-11	4.45e-09
GO_TRANSCRIPTION_FROM_RNA_POLYMERASE_II_PROMOTER	724	The synthesis of RNA from a DNA template by RNA polymerase II, originating at an RNA polymerase II promoter. Includes transcription of messenger RNA (mRNA) and certain small nuclear RNAs (snRNAs).	23	0.0318	2.51e-11	4.71e-09
GO_POSITIVE_REGULATION_OF_MOLECULAR_FUNCTION	1791	Any process that activates or increases the rate or extent of a molecular function, an elemental biological activity occurring at the molecular level, such as catalysis or binding.	36	0.0201	2.87e-11	5.31e-09
GO_REGULATION_OF_TRANSFERASE_ACTIVITY	946	Any process that modulates the frequency, rate or extent of transferase activity, the catalysis of the transfer of a group, e.g. a methyl group, glycosyl group, acyl group, phosphorus-containing, or other groups, from one compound (generally regarded as the donor) to another compound (generally regarded as the acceptor). Transferase is the systematic name for any enzyme of EC class 2.	26	0.0275	2.89e-11	5.31e-09
GO_NEGATIVE_REGULATION_OF_CELL_DEATH	872	Any process that decreases the rate or frequency of cell death. Cell death is the specific activation or halting of processes within a cell so that its vital functions markedly cease, rather than simply deteriorating gradually over time, which culminates in cell death.	25	0.0287	2.92e-11	5.31e-09
GROSS_HYPOXIA_VIA_ELK3_AND_HIF1A_UP	142	Genes up-regulated in SEND cells (skin endothelium) at hypoxia after knockdown of ELK3 [GeneID=2004] and HIF1A [GeneID=3091] by RNAi.	12	0.0845	3.02e-11	5.44e-09
GO_REGULATION_OF_CELL_CYCLE	949	Any process that modulates the rate or extent of progression through the cell cycle.	26	0.0274	3.1e-11	5.52e-09
Gene/Gene Set Overlap Matrix
Entrez Gene Id	Gene Symbol	Gene Description	BUYTAERT_PHOTODYNAMIC_THERAPY_STRESS_UP	ZWANG_CLASS_1_TRANSIENTLY_INDUCED_BY_EGF	NUYTTEN_EZH2_TARGETS_UP	KOINUMA_TARGETS_OF_SMAD2_OR_SMAD3	PASINI_SUZ12_TARGETS_DN	CHARAFE_BREAST_CANCER_LUMINAL_VS_BASAL_DN	GEORGES_TARGETS_OF_MIR192_AND_MIR215	DUTERTRE_ESTRADIOL_RESPONSE_24HR_DN	CHARAFE_BREAST_CANCER_LUMINAL_VS_MESENCHYMAL_DN	WONG_ADULT_TISSUE_STEM_MODULE	HUANG_DASATINIB_RESISTANCE_UP	GO_REGULATION_OF_INTRACELLULAR_SIGNAL_TRANSDUCTION	CUI_TCF21_TARGETS_2_DN	KRIGE_RESPONSE_TO_TOSEDOSTAT_24HR_UP	GO_CELLULAR_RESPONSE_TO_STRESS	GO_NEGATIVE_REGULATION_OF_RESPONSE_TO_STIMULUS	MITSIADES_RESPONSE_TO_APLIDIN_UP	GO_INTRACELLULAR_SIGNAL_TRANSDUCTION	REACTOME_GENERIC_TRANSCRIPTION_PATHWAY	ZWANG_TRANSIENTLY_UP_BY_1ST_EGF_PULSE_ONLY	GO_TISSUE_DEVELOPMENT	HALLMARK_TNFA_SIGNALING_VIA_NFKB	CONCANNON_APOPTOSIS_BY_EPOXOMICIN_UP	NAGASHIMA_NRG1_SIGNALING_UP	GO_REGULATION_OF_CELLULAR_COMPONENT_MOVEMENT	ZWANG_CLASS_3_TRANSIENTLY_INDUCED_BY_EGF	BILD_HRAS_ONCOGENIC_SIGNATURE	GRAESSMANN_APOPTOSIS_BY_DOXORUBICIN_UP	GO_REGULATION_OF_PHOSPHORUS_METABOLIC_PROCESS	GO_REGULATION_OF_PROTEIN_MODIFICATION_PROCESS	EGFR_UP.V1_UP	GO_REGULATION_OF_CELL_DEATH	LEE_BMP2_TARGETS_DN	KRIGE_RESPONSE_TO_TOSEDOSTAT_6HR_UP	GO_RESPONSE_TO_EXTERNAL_STIMULUS	KOBAYASHI_EGFR_SIGNALING_6HR_DN	GSE9988_LOW_LPS_VS_CTRL_TREATED_MONOCYTE_UP	GSE9988_LOW_LPS_VS_VEHICLE_TREATED_MONOCYTE_UP	GO_REGULATION_OF_MULTICELLULAR_ORGANISMAL_DEVELOPMENT	GO_NEGATIVE_REGULATION_OF_CELL_COMMUNICATION	WINTER_HYPOXIA_METAGENE	GO_NUCLEIC_ACID_BINDING_TRANSCRIPTION_FACTOR_ACTIVITY	GO_POSITIVE_REGULATION_OF_CELL_COMMUNICATION	GO_EPITHELIUM_DEVELOPMENT	ENK_UV_RESPONSE_EPIDERMIS_DN	GO_POSITIVE_REGULATION_OF_RESPONSE_TO_STIMULUS	WANG_METHYLATED_IN_BREAST_CANCER
571	BACH1	BTB and CNC homology 1, basic leucine zipper transcription factor 1	BUYTAERT_PHOTODYNAMIC_THERAPY_STRESS_UP	ZWANG_CLASS_1_TRANSIENTLY_INDUCED_BY_EGF	NUYTTEN_EZH2_TARGETS_UP	KOINUMA_TARGETS_OF_SMAD2_OR_SMAD3					CHARAFE_BREAST_CANCER_LUMINAL_VS_MESENCHYMAL_DN	WONG_ADULT_TISSUE_STEM_MODULE					GO_CELLULAR_RESPONSE_TO_STRESS		MITSIADES_RESPONSE_TO_APLIDIN_UP																									GO_NUCLEIC_ACID_BINDING_TRANSCRIPTION_FACTOR_ACTIVITY
51762	RAB8B	RAB8B, member RAS oncogene family	BUYTAERT_PHOTODYNAMIC_THERAPY_STRESS_UP	ZWANG_CLASS_1_TRANSIENTLY_INDUCED_BY_EGF	NUYTTEN_EZH2_TARGETS_UP				GEORGES_TARGETS_OF_MIR192_AND_MIR215		CHARAFE_BREAST_CANCER_LUMINAL_VS_MESENCHYMAL_DN					KRIGE_RESPONSE_TO_TOSEDOSTAT_24HR_UP				GO_INTRACELLULAR_SIGNAL_TRANSDUCTION																KRIGE_RESPONSE_TO_TOSEDOSTAT_6HR_UP									GO_POSITIVE_REGULATION_OF_CELL_COMMUNICATION
9052	GPRC5A	G protein-coupled receptor, family C, group 5, member A	BUYTAERT_PHOTODYNAMIC_THERAPY_STRESS_UP	ZWANG_CLASS_1_TRANSIENTLY_INDUCED_BY_EGF		KOINUMA_TARGETS_OF_SMAD2_OR_SMAD3	PASINI_SUZ12_TARGETS_DN											GO_NEGATIVE_REGULATION_OF_RESPONSE_TO_STIMULUS													GO_REGULATION_OF_PHOSPHORUS_METABOLIC_PROCESS	GO_REGULATION_OF_PROTEIN_MODIFICATION_PROCESS								GSE9988_LOW_LPS_VS_VEHICLE_TREATED_MONOCYTE_UP		GO_NEGATIVE_REGULATION_OF_CELL_COMMUNICATION	WINTER_HYPOXIA_METAGENE
11221	DUSP10	dual specificity phosphatase 10	BUYTAERT_PHOTODYNAMIC_THERAPY_STRESS_UP	ZWANG_CLASS_1_TRANSIENTLY_INDUCED_BY_EGF		KOINUMA_TARGETS_OF_SMAD2_OR_SMAD3				DUTERTRE_ESTRADIOL_RESPONSE_24HR_DN			HUANG_DASATINIB_RESISTANCE_UP	GO_REGULATION_OF_INTRACELLULAR_SIGNAL_TRANSDUCTION		KRIGE_RESPONSE_TO_TOSEDOSTAT_24HR_UP	GO_CELLULAR_RESPONSE_TO_STRESS	GO_NEGATIVE_REGULATION_OF_RESPONSE_TO_STIMULUS		GO_INTRACELLULAR_SIGNAL_TRANSDUCTION						NAGASHIMA_NRG1_SIGNALING_UP					GO_REGULATION_OF_PHOSPHORUS_METABOLIC_PROCESS	GO_REGULATION_OF_PROTEIN_MODIFICATION_PROCESS				KRIGE_RESPONSE_TO_TOSEDOSTAT_6HR_UP	GO_RESPONSE_TO_EXTERNAL_STIMULUS				GO_REGULATION_OF_MULTICELLULAR_ORGANISMAL_DEVELOPMENT	GO_NEGATIVE_REGULATION_OF_CELL_COMMUNICATION					ENK_UV_RESPONSE_EPIDERMIS_DN
10253	SPRY2	sprouty homolog 2 (Drosophila)	BUYTAERT_PHOTODYNAMIC_THERAPY_STRESS_UP	ZWANG_CLASS_1_TRANSIENTLY_INDUCED_BY_EGF				CHARAFE_BREAST_CANCER_LUMINAL_VS_BASAL_DN			CHARAFE_BREAST_CANCER_LUMINAL_VS_MESENCHYMAL_DN			GO_REGULATION_OF_INTRACELLULAR_SIGNAL_TRANSDUCTION				GO_NEGATIVE_REGULATION_OF_RESPONSE_TO_STIMULUS					GO_TISSUE_DEVELOPMENT								GO_REGULATION_OF_PHOSPHORUS_METABOLIC_PROCESS	GO_REGULATION_OF_PROTEIN_MODIFICATION_PROCESS		GO_REGULATION_OF_CELL_DEATH								GO_NEGATIVE_REGULATION_OF_CELL_COMMUNICATION			GO_POSITIVE_REGULATION_OF_CELL_COMMUNICATION	GO_EPITHELIUM_DEVELOPMENT	ENK_UV_RESPONSE_EPIDERMIS_DN	GO_POSITIVE_REGULATION_OF_RESPONSE_TO_STIMULUS
80219	COQ10B	coenzyme Q10 homolog B (S. cerevisiae)	BUYTAERT_PHOTODYNAMIC_THERAPY_STRESS_UP	ZWANG_CLASS_1_TRANSIENTLY_INDUCED_BY_EGF						DUTERTRE_ESTRADIOL_RESPONSE_24HR_DN					CUI_TCF21_TARGETS_2_DN																				LEE_BMP2_TARGETS_DN
1263	PLK3	polo-like kinase 3	BUYTAERT_PHOTODYNAMIC_THERAPY_STRESS_UP	ZWANG_CLASS_1_TRANSIENTLY_INDUCED_BY_EGF										GO_REGULATION_OF_INTRACELLULAR_SIGNAL_TRANSDUCTION			GO_CELLULAR_RESPONSE_TO_STRESS			GO_INTRACELLULAR_SIGNAL_TRANSDUCTION										GRAESSMANN_APOPTOSIS_BY_DOXORUBICIN_UP				GO_REGULATION_OF_CELL_DEATH					GSE9988_LOW_LPS_VS_CTRL_TREATED_MONOCYTE_UP	GSE9988_LOW_LPS_VS_VEHICLE_TREATED_MONOCYTE_UP
467	ATF3	activating transcription factor 3	BUYTAERT_PHOTODYNAMIC_THERAPY_STRESS_UP		NUYTTEN_EZH2_TARGETS_UP	KOINUMA_TARGETS_OF_SMAD2_OR_SMAD3						WONG_ADULT_TISSUE_STEM_MODULE		GO_REGULATION_OF_INTRACELLULAR_SIGNAL_TRANSDUCTION		KRIGE_RESPONSE_TO_TOSEDOSTAT_24HR_UP	GO_CELLULAR_RESPONSE_TO_STRESS	GO_NEGATIVE_REGULATION_OF_RESPONSE_TO_STIMULUS					GO_TISSUE_DEVELOPMENT	HALLMARK_TNFA_SIGNALING_VIA_NFKB	CONCANNON_APOPTOSIS_BY_EPOXOMICIN_UP	NAGASHIMA_NRG1_SIGNALING_UP		ZWANG_CLASS_3_TRANSIENTLY_INDUCED_BY_EGF		GRAESSMANN_APOPTOSIS_BY_DOXORUBICIN_UP	GO_REGULATION_OF_PHOSPHORUS_METABOLIC_PROCESS	GO_REGULATION_OF_PROTEIN_MODIFICATION_PROCESS	EGFR_UP.V1_UP	GO_REGULATION_OF_CELL_DEATH		KRIGE_RESPONSE_TO_TOSEDOSTAT_6HR_UP	GO_RESPONSE_TO_EXTERNAL_STIMULUS					GO_NEGATIVE_REGULATION_OF_CELL_COMMUNICATION		GO_NUCLEIC_ACID_BINDING_TRANSCRIPTION_FACTOR_ACTIVITY	GO_POSITIVE_REGULATION_OF_CELL_COMMUNICATION		ENK_UV_RESPONSE_EPIDERMIS_DN	GO_POSITIVE_REGULATION_OF_RESPONSE_TO_STIMULUS
7980	TFPI2	tissue factor pathway inhibitor 2	BUYTAERT_PHOTODYNAMIC_THERAPY_STRESS_UP		NUYTTEN_EZH2_TARGETS_UP	KOINUMA_TARGETS_OF_SMAD2_OR_SMAD3																							BILD_HRAS_ONCOGENIC_SIGNATURE
55608	ANKRD10	ankyrin repeat domain 10	BUYTAERT_PHOTODYNAMIC_THERAPY_STRESS_UP		NUYTTEN_EZH2_TARGETS_UP	KOINUMA_TARGETS_OF_SMAD2_OR_SMAD3																								GRAESSMANN_APOPTOSIS_BY_DOXORUBICIN_UP
1491	CTH	cystathionase (cystathionine gamma-lyase)	BUYTAERT_PHOTODYNAMIC_THERAPY_STRESS_UP		NUYTTEN_EZH2_TARGETS_UP				GEORGES_TARGETS_OF_MIR192_AND_MIR215					GO_REGULATION_OF_INTRACELLULAR_SIGNAL_TRANSDUCTION		KRIGE_RESPONSE_TO_TOSEDOSTAT_24HR_UP	GO_CELLULAR_RESPONSE_TO_STRESS	GO_NEGATIVE_REGULATION_OF_RESPONSE_TO_STIMULUS	MITSIADES_RESPONSE_TO_APLIDIN_UP			ZWANG_TRANSIENTLY_UP_BY_1ST_EGF_PULSE_ONLY			CONCANNON_APOPTOSIS_BY_EPOXOMICIN_UP	NAGASHIMA_NRG1_SIGNALING_UP								GO_REGULATION_OF_CELL_DEATH		KRIGE_RESPONSE_TO_TOSEDOSTAT_6HR_UP					GO_REGULATION_OF_MULTICELLULAR_ORGANISMAL_DEVELOPMENT	GO_NEGATIVE_REGULATION_OF_CELL_COMMUNICATION			GO_POSITIVE_REGULATION_OF_CELL_COMMUNICATION			GO_POSITIVE_REGULATION_OF_RESPONSE_TO_STIMULUS
1649	DDIT3	DNA-damage-inducible transcript 3	BUYTAERT_PHOTODYNAMIC_THERAPY_STRESS_UP		NUYTTEN_EZH2_TARGETS_UP					DUTERTRE_ESTRADIOL_RESPONSE_24HR_DN		WONG_ADULT_TISSUE_STEM_MODULE		GO_REGULATION_OF_INTRACELLULAR_SIGNAL_TRANSDUCTION			GO_CELLULAR_RESPONSE_TO_STRESS	GO_NEGATIVE_REGULATION_OF_RESPONSE_TO_STIMULUS	MITSIADES_RESPONSE_TO_APLIDIN_UP	GO_INTRACELLULAR_SIGNAL_TRANSDUCTION					CONCANNON_APOPTOSIS_BY_EPOXOMICIN_UP	NAGASHIMA_NRG1_SIGNALING_UP				GRAESSMANN_APOPTOSIS_BY_DOXORUBICIN_UP				GO_REGULATION_OF_CELL_DEATH			GO_RESPONSE_TO_EXTERNAL_STIMULUS				GO_REGULATION_OF_MULTICELLULAR_ORGANISMAL_DEVELOPMENT	GO_NEGATIVE_REGULATION_OF_CELL_COMMUNICATION	WINTER_HYPOXIA_METAGENE	GO_NUCLEIC_ACID_BINDING_TRANSCRIPTION_FACTOR_ACTIVITY	GO_POSITIVE_REGULATION_OF_CELL_COMMUNICATION			GO_POSITIVE_REGULATION_OF_RESPONSE_TO_STIMULUS
10133	OPTN	optineurin	BUYTAERT_PHOTODYNAMIC_THERAPY_STRESS_UP		NUYTTEN_EZH2_TARGETS_UP					DUTERTRE_ESTRADIOL_RESPONSE_24HR_DN				GO_REGULATION_OF_INTRACELLULAR_SIGNAL_TRANSDUCTION	CUI_TCF21_TARGETS_2_DN			GO_NEGATIVE_REGULATION_OF_RESPONSE_TO_STIMULUS																			GO_RESPONSE_TO_EXTERNAL_STIMULUS					GO_NEGATIVE_REGULATION_OF_CELL_COMMUNICATION
9314	KLF4	Kruppel-like factor 4 (gut)	BUYTAERT_PHOTODYNAMIC_THERAPY_STRESS_UP		NUYTTEN_EZH2_TARGETS_UP							WONG_ADULT_TISSUE_STEM_MODULE		GO_REGULATION_OF_INTRACELLULAR_SIGNAL_TRANSDUCTION	CUI_TCF21_TARGETS_2_DN	KRIGE_RESPONSE_TO_TOSEDOSTAT_24HR_UP	GO_CELLULAR_RESPONSE_TO_STRESS	GO_NEGATIVE_REGULATION_OF_RESPONSE_TO_STIMULUS	MITSIADES_RESPONSE_TO_APLIDIN_UP				GO_TISSUE_DEVELOPMENT	HALLMARK_TNFA_SIGNALING_VIA_NFKB			GO_REGULATION_OF_CELLULAR_COMPONENT_MOVEMENT	ZWANG_CLASS_3_TRANSIENTLY_INDUCED_BY_EGF			GO_REGULATION_OF_PHOSPHORUS_METABOLIC_PROCESS	GO_REGULATION_OF_PROTEIN_MODIFICATION_PROCESS	EGFR_UP.V1_UP	GO_REGULATION_OF_CELL_DEATH		KRIGE_RESPONSE_TO_TOSEDOSTAT_6HR_UP					GO_REGULATION_OF_MULTICELLULAR_ORGANISMAL_DEVELOPMENT	GO_NEGATIVE_REGULATION_OF_CELL_COMMUNICATION		GO_NUCLEIC_ACID_BINDING_TRANSCRIPTION_FACTOR_ACTIVITY		GO_EPITHELIUM_DEVELOPMENT
6102	RP2	retinitis pigmentosa 2 (X-linked recessive)	BUYTAERT_PHOTODYNAMIC_THERAPY_STRESS_UP		NUYTTEN_EZH2_TARGETS_UP																	ZWANG_TRANSIENTLY_UP_BY_1ST_EGF_PULSE_ONLY
54619	CCNJ	cyclin J	BUYTAERT_PHOTODYNAMIC_THERAPY_STRESS_UP		NUYTTEN_EZH2_TARGETS_UP
2150	F2RL1	coagulation factor II (thrombin) receptor-like 1	BUYTAERT_PHOTODYNAMIC_THERAPY_STRESS_UP			KOINUMA_TARGETS_OF_SMAD2_OR_SMAD3		CHARAFE_BREAST_CANCER_LUMINAL_VS_BASAL_DN					HUANG_DASATINIB_RESISTANCE_UP	GO_REGULATION_OF_INTRACELLULAR_SIGNAL_TRANSDUCTION				GO_NEGATIVE_REGULATION_OF_RESPONSE_TO_STIMULUS					GO_TISSUE_DEVELOPMENT	HALLMARK_TNFA_SIGNALING_VIA_NFKB	CONCANNON_APOPTOSIS_BY_EPOXOMICIN_UP	NAGASHIMA_NRG1_SIGNALING_UP	GO_REGULATION_OF_CELLULAR_COMPONENT_MOVEMENT	ZWANG_CLASS_3_TRANSIENTLY_INDUCED_BY_EGF			GO_REGULATION_OF_PHOSPHORUS_METABOLIC_PROCESS	GO_REGULATION_OF_PROTEIN_MODIFICATION_PROCESS	EGFR_UP.V1_UP				GO_RESPONSE_TO_EXTERNAL_STIMULUS					GO_NEGATIVE_REGULATION_OF_CELL_COMMUNICATION			GO_POSITIVE_REGULATION_OF_CELL_COMMUNICATION	GO_EPITHELIUM_DEVELOPMENT	ENK_UV_RESPONSE_EPIDERMIS_DN	GO_POSITIVE_REGULATION_OF_RESPONSE_TO_STIMULUS
8780	RIOK3	RIO kinase 3 (yeast)	BUYTAERT_PHOTODYNAMIC_THERAPY_STRESS_UP			KOINUMA_TARGETS_OF_SMAD2_OR_SMAD3		CHARAFE_BREAST_CANCER_LUMINAL_VS_BASAL_DN							CUI_TCF21_TARGETS_2_DN	KRIGE_RESPONSE_TO_TOSEDOSTAT_24HR_UP			MITSIADES_RESPONSE_TO_APLIDIN_UP																	KRIGE_RESPONSE_TO_TOSEDOSTAT_6HR_UP							WINTER_HYPOXIA_METAGENE
1604	CD55	CD55 molecule, decay accelerating factor for complement (Cromer blood group)	BUYTAERT_PHOTODYNAMIC_THERAPY_STRESS_UP			KOINUMA_TARGETS_OF_SMAD2_OR_SMAD3				DUTERTRE_ESTRADIOL_RESPONSE_24HR_DN					CUI_TCF21_TARGETS_2_DN	KRIGE_RESPONSE_TO_TOSEDOSTAT_24HR_UP		GO_NEGATIVE_REGULATION_OF_RESPONSE_TO_STIMULUS										ZWANG_CLASS_3_TRANSIENTLY_INDUCED_BY_EGF	BILD_HRAS_ONCOGENIC_SIGNATURE	GRAESSMANN_APOPTOSIS_BY_DOXORUBICIN_UP						KRIGE_RESPONSE_TO_TOSEDOSTAT_6HR_UP											ENK_UV_RESPONSE_EPIDERMIS_DN	GO_POSITIVE_REGULATION_OF_RESPONSE_TO_STIMULUS
23710	GABARAPL1	GABA(A) receptor-associated protein like 1	BUYTAERT_PHOTODYNAMIC_THERAPY_STRESS_UP			KOINUMA_TARGETS_OF_SMAD2_OR_SMAD3						WONG_ADULT_TISSUE_STEM_MODULE					GO_CELLULAR_RESPONSE_TO_STRESS		MITSIADES_RESPONSE_TO_APLIDIN_UP			ZWANG_TRANSIENTLY_UP_BY_1ST_EGF_PULSE_ONLY			CONCANNON_APOPTOSIS_BY_EPOXOMICIN_UP												GO_RESPONSE_TO_EXTERNAL_STIMULUS
9988	DMTF1	cyclin D binding myb-like transcription factor 1	BUYTAERT_PHOTODYNAMIC_THERAPY_STRESS_UP			KOINUMA_TARGETS_OF_SMAD2_OR_SMAD3													MITSIADES_RESPONSE_TO_APLIDIN_UP																									GO_NUCLEIC_ACID_BINDING_TRANSCRIPTION_FACTOR_ACTIVITY
3775	KCNK1	potassium channel, subfamily K, member 1	BUYTAERT_PHOTODYNAMIC_THERAPY_STRESS_UP			KOINUMA_TARGETS_OF_SMAD2_OR_SMAD3																ZWANG_TRANSIENTLY_UP_BY_1ST_EGF_PULSE_ONLY							BILD_HRAS_ONCOGENIC_SIGNATURE																		ENK_UV_RESPONSE_EPIDERMIS_DN
10208	USPL1	ubiquitin specific peptidase like 1	BUYTAERT_PHOTODYNAMIC_THERAPY_STRESS_UP			KOINUMA_TARGETS_OF_SMAD2_OR_SMAD3																ZWANG_TRANSIENTLY_UP_BY_1ST_EGF_PULSE_ONLY
3673	ITGA2	integrin, alpha 2 (CD49B, alpha 2 subunit of VLA-2 receptor)	BUYTAERT_PHOTODYNAMIC_THERAPY_STRESS_UP			KOINUMA_TARGETS_OF_SMAD2_OR_SMAD3																	GO_TISSUE_DEVELOPMENT				GO_REGULATION_OF_CELLULAR_COMPONENT_MOVEMENT	ZWANG_CLASS_3_TRANSIENTLY_INDUCED_BY_EGF	BILD_HRAS_ONCOGENIC_SIGNATURE		GO_REGULATION_OF_PHOSPHORUS_METABOLIC_PROCESS	GO_REGULATION_OF_PROTEIN_MODIFICATION_PROCESS	EGFR_UP.V1_UP				GO_RESPONSE_TO_EXTERNAL_STIMULUS								GO_POSITIVE_REGULATION_OF_CELL_COMMUNICATION	GO_EPITHELIUM_DEVELOPMENT	ENK_UV_RESPONSE_EPIDERMIS_DN	GO_POSITIVE_REGULATION_OF_RESPONSE_TO_STIMULUS
7702	ZNF143	zinc finger protein 143	BUYTAERT_PHOTODYNAMIC_THERAPY_STRESS_UP			KOINUMA_TARGETS_OF_SMAD2_OR_SMAD3
1843	DUSP1	dual specificity phosphatase 1	BUYTAERT_PHOTODYNAMIC_THERAPY_STRESS_UP				PASINI_SUZ12_TARGETS_DN			DUTERTRE_ESTRADIOL_RESPONSE_24HR_DN		WONG_ADULT_TISSUE_STEM_MODULE		GO_REGULATION_OF_INTRACELLULAR_SIGNAL_TRANSDUCTION				GO_NEGATIVE_REGULATION_OF_RESPONSE_TO_STIMULUS	MITSIADES_RESPONSE_TO_APLIDIN_UP	GO_INTRACELLULAR_SIGNAL_TRANSDUCTION			GO_TISSUE_DEVELOPMENT	HALLMARK_TNFA_SIGNALING_VIA_NFKB	CONCANNON_APOPTOSIS_BY_EPOXOMICIN_UP	NAGASHIMA_NRG1_SIGNALING_UP		ZWANG_CLASS_3_TRANSIENTLY_INDUCED_BY_EGF	BILD_HRAS_ONCOGENIC_SIGNATURE		GO_REGULATION_OF_PHOSPHORUS_METABOLIC_PROCESS	GO_REGULATION_OF_PROTEIN_MODIFICATION_PROCESS		GO_REGULATION_OF_CELL_DEATH					GSE9988_LOW_LPS_VS_CTRL_TREATED_MONOCYTE_UP	GSE9988_LOW_LPS_VS_VEHICLE_TREATED_MONOCYTE_UP		GO_NEGATIVE_REGULATION_OF_CELL_COMMUNICATION							WANG_METHYLATED_IN_BREAST_CANCER
10370	CITED2	Cbp/p300-interacting transactivator, with Glu/Asp-rich carboxy-terminal domain, 2	BUYTAERT_PHOTODYNAMIC_THERAPY_STRESS_UP				PASINI_SUZ12_TARGETS_DN			DUTERTRE_ESTRADIOL_RESPONSE_24HR_DN		WONG_ADULT_TISSUE_STEM_MODULE			CUI_TCF21_TARGETS_2_DN		GO_CELLULAR_RESPONSE_TO_STRESS						GO_TISSUE_DEVELOPMENT				GO_REGULATION_OF_CELLULAR_COMPONENT_MOVEMENT			GRAESSMANN_APOPTOSIS_BY_DOXORUBICIN_UP				GO_REGULATION_OF_CELL_DEATH							GO_REGULATION_OF_MULTICELLULAR_ORGANISMAL_DEVELOPMENT		WINTER_HYPOXIA_METAGENE	GO_NUCLEIC_ACID_BINDING_TRANSCRIPTION_FACTOR_ACTIVITY	GO_POSITIVE_REGULATION_OF_CELL_COMMUNICATION	GO_EPITHELIUM_DEVELOPMENT		GO_POSITIVE_REGULATION_OF_RESPONSE_TO_STIMULUS
25901	CCDC28A	coiled-coil domain containing 28A	BUYTAERT_PHOTODYNAMIC_THERAPY_STRESS_UP					CHARAFE_BREAST_CANCER_LUMINAL_VS_BASAL_DN														ZWANG_TRANSIENTLY_UP_BY_1ST_EGF_PULSE_ONLY
23411	SIRT1	sirtuin 1	BUYTAERT_PHOTODYNAMIC_THERAPY_STRESS_UP						GEORGES_TARGETS_OF_MIR192_AND_MIR215					GO_REGULATION_OF_INTRACELLULAR_SIGNAL_TRANSDUCTION			GO_CELLULAR_RESPONSE_TO_STRESS	GO_NEGATIVE_REGULATION_OF_RESPONSE_TO_STIMULUS		GO_INTRACELLULAR_SIGNAL_TRANSDUCTION										GRAESSMANN_APOPTOSIS_BY_DOXORUBICIN_UP	GO_REGULATION_OF_PHOSPHORUS_METABOLIC_PROCESS	GO_REGULATION_OF_PROTEIN_MODIFICATION_PROCESS		GO_REGULATION_OF_CELL_DEATH			GO_RESPONSE_TO_EXTERNAL_STIMULUS				GO_REGULATION_OF_MULTICELLULAR_ORGANISMAL_DEVELOPMENT	GO_NEGATIVE_REGULATION_OF_CELL_COMMUNICATION			GO_POSITIVE_REGULATION_OF_CELL_COMMUNICATION		ENK_UV_RESPONSE_EPIDERMIS_DN	GO_POSITIVE_REGULATION_OF_RESPONSE_TO_STIMULUS
22911	WDR47	WD repeat domain 47	BUYTAERT_PHOTODYNAMIC_THERAPY_STRESS_UP						GEORGES_TARGETS_OF_MIR192_AND_MIR215													ZWANG_TRANSIENTLY_UP_BY_1ST_EGF_PULSE_ONLY
11108	PRDM4	PR domain containing 4	BUYTAERT_PHOTODYNAMIC_THERAPY_STRESS_UP						GEORGES_TARGETS_OF_MIR192_AND_MIR215																												GO_RESPONSE_TO_EXTERNAL_STIMULUS
64121	RRAGC	Ras-related GTP binding C	BUYTAERT_PHOTODYNAMIC_THERAPY_STRESS_UP											GO_REGULATION_OF_INTRACELLULAR_SIGNAL_TRANSDUCTION			GO_CELLULAR_RESPONSE_TO_STRESS			GO_INTRACELLULAR_SIGNAL_TRANSDUCTION		ZWANG_TRANSIENTLY_UP_BY_1ST_EGF_PULSE_ONLY								GRAESSMANN_APOPTOSIS_BY_DOXORUBICIN_UP							GO_RESPONSE_TO_EXTERNAL_STIMULUS								GO_POSITIVE_REGULATION_OF_CELL_COMMUNICATION			GO_POSITIVE_REGULATION_OF_RESPONSE_TO_STIMULUS
55454	CSGALNACT2	chondroitin sulfate N-acetylgalactosaminyltransferase 2	BUYTAERT_PHOTODYNAMIC_THERAPY_STRESS_UP												CUI_TCF21_TARGETS_2_DN	KRIGE_RESPONSE_TO_TOSEDOSTAT_24HR_UP						ZWANG_TRANSIENTLY_UP_BY_1ST_EGF_PULSE_ONLY														KRIGE_RESPONSE_TO_TOSEDOSTAT_6HR_UP
5209	PFKFB3	6-phosphofructo-2-kinase/fructose-2,6-biphosphatase 3	BUYTAERT_PHOTODYNAMIC_THERAPY_STRESS_UP												CUI_TCF21_TARGETS_2_DN				MITSIADES_RESPONSE_TO_APLIDIN_UP					HALLMARK_TNFA_SIGNALING_VIA_NFKB		NAGASHIMA_NRG1_SIGNALING_UP		ZWANG_CLASS_3_TRANSIENTLY_INDUCED_BY_EGF											GSE9988_LOW_LPS_VS_CTRL_TREATED_MONOCYTE_UP				WINTER_HYPOXIA_METAGENE				ENK_UV_RESPONSE_EPIDERMIS_DN
9659	PDE4DIP	phosphodiesterase 4D interacting protein	BUYTAERT_PHOTODYNAMIC_THERAPY_STRESS_UP												CUI_TCF21_TARGETS_2_DN							ZWANG_TRANSIENTLY_UP_BY_1ST_EGF_PULSE_ONLY								GRAESSMANN_APOPTOSIS_BY_DOXORUBICIN_UP
79094	CHAC1	ChaC, cation transport regulator homolog 1 (E. coli)	BUYTAERT_PHOTODYNAMIC_THERAPY_STRESS_UP													KRIGE_RESPONSE_TO_TOSEDOSTAT_24HR_UP	GO_CELLULAR_RESPONSE_TO_STRESS	GO_NEGATIVE_REGULATION_OF_RESPONSE_TO_STIMULUS		GO_INTRACELLULAR_SIGNAL_TRANSDUCTION										GRAESSMANN_APOPTOSIS_BY_DOXORUBICIN_UP						KRIGE_RESPONSE_TO_TOSEDOSTAT_6HR_UP						GO_NEGATIVE_REGULATION_OF_CELL_COMMUNICATION
80223	RAB11FIP1	RAB11 family interacting protein 1 (class I)	BUYTAERT_PHOTODYNAMIC_THERAPY_STRESS_UP													KRIGE_RESPONSE_TO_TOSEDOSTAT_24HR_UP																				KRIGE_RESPONSE_TO_TOSEDOSTAT_6HR_UP						GO_NEGATIVE_REGULATION_OF_CELL_COMMUNICATION
22990	PCNX	pecanex homolog (Drosophila)	BUYTAERT_PHOTODYNAMIC_THERAPY_STRESS_UP													KRIGE_RESPONSE_TO_TOSEDOSTAT_24HR_UP																				KRIGE_RESPONSE_TO_TOSEDOSTAT_6HR_UP
9821	RB1CC1	RB1-inducible coiled-coil 1	BUYTAERT_PHOTODYNAMIC_THERAPY_STRESS_UP														GO_CELLULAR_RESPONSE_TO_STRESS	GO_NEGATIVE_REGULATION_OF_RESPONSE_TO_STIMULUS		GO_INTRACELLULAR_SIGNAL_TRANSDUCTION		ZWANG_TRANSIENTLY_UP_BY_1ST_EGF_PULSE_ONLY									GO_REGULATION_OF_PHOSPHORUS_METABOLIC_PROCESS	GO_REGULATION_OF_PROTEIN_MODIFICATION_PROCESS		GO_REGULATION_OF_CELL_DEATH								GO_NEGATIVE_REGULATION_OF_CELL_COMMUNICATION
64061	TSPYL2	TSPY-like 2	BUYTAERT_PHOTODYNAMIC_THERAPY_STRESS_UP														GO_CELLULAR_RESPONSE_TO_STRESS		MITSIADES_RESPONSE_TO_APLIDIN_UP						CONCANNON_APOPTOSIS_BY_EPOXOMICIN_UP						GO_REGULATION_OF_PHOSPHORUS_METABOLIC_PROCESS	GO_REGULATION_OF_PROTEIN_MODIFICATION_PROCESS
55602	CDKN2AIP	CDKN2A interacting protein	BUYTAERT_PHOTODYNAMIC_THERAPY_STRESS_UP														GO_CELLULAR_RESPONSE_TO_STRESS		MITSIADES_RESPONSE_TO_APLIDIN_UP																										GO_POSITIVE_REGULATION_OF_CELL_COMMUNICATION			GO_POSITIVE_REGULATION_OF_RESPONSE_TO_STIMULUS
55361	PI4K2A	phosphatidylinositol 4-kinase type 2 alpha	BUYTAERT_PHOTODYNAMIC_THERAPY_STRESS_UP														GO_CELLULAR_RESPONSE_TO_STRESS
23429	RYBP	RING1 and YY1 binding protein	BUYTAERT_PHOTODYNAMIC_THERAPY_STRESS_UP																MITSIADES_RESPONSE_TO_APLIDIN_UP			ZWANG_TRANSIENTLY_UP_BY_1ST_EGF_PULSE_ONLY																	GSE9988_LOW_LPS_VS_CTRL_TREATED_MONOCYTE_UP	GSE9988_LOW_LPS_VS_VEHICLE_TREATED_MONOCYTE_UP							ENK_UV_RESPONSE_EPIDERMIS_DN
23483	TGDS	TDP-glucose 4,6-dehydratase	BUYTAERT_PHOTODYNAMIC_THERAPY_STRESS_UP																MITSIADES_RESPONSE_TO_APLIDIN_UP
90634	N4BP2L1	NEDD4 binding protein 2-like 1	BUYTAERT_PHOTODYNAMIC_THERAPY_STRESS_UP																			ZWANG_TRANSIENTLY_UP_BY_1ST_EGF_PULSE_ONLY								GRAESSMANN_APOPTOSIS_BY_DOXORUBICIN_UP
205564	SENP5	SUMO1/sentrin specific peptidase 5	BUYTAERT_PHOTODYNAMIC_THERAPY_STRESS_UP
7057	THBS1	thrombospondin 1		ZWANG_CLASS_1_TRANSIENTLY_INDUCED_BY_EGF	NUYTTEN_EZH2_TARGETS_UP	KOINUMA_TARGETS_OF_SMAD2_OR_SMAD3	PASINI_SUZ12_TARGETS_DN					WONG_ADULT_TISSUE_STEM_MODULE		GO_REGULATION_OF_INTRACELLULAR_SIGNAL_TRANSDUCTION	CUI_TCF21_TARGETS_2_DN		GO_CELLULAR_RESPONSE_TO_STRESS	GO_NEGATIVE_REGULATION_OF_RESPONSE_TO_STIMULUS									GO_REGULATION_OF_CELLULAR_COMPONENT_MOVEMENT			GRAESSMANN_APOPTOSIS_BY_DOXORUBICIN_UP	GO_REGULATION_OF_PHOSPHORUS_METABOLIC_PROCESS	GO_REGULATION_OF_PROTEIN_MODIFICATION_PROCESS		GO_REGULATION_OF_CELL_DEATH							GO_REGULATION_OF_MULTICELLULAR_ORGANISMAL_DEVELOPMENT	GO_NEGATIVE_REGULATION_OF_CELL_COMMUNICATION	WINTER_HYPOXIA_METAGENE		GO_POSITIVE_REGULATION_OF_CELL_COMMUNICATION			GO_POSITIVE_REGULATION_OF_RESPONSE_TO_STIMULUS	WANG_METHYLATED_IN_BREAST_CANCER
3914	LAMB3	laminin, beta 3		ZWANG_CLASS_1_TRANSIENTLY_INDUCED_BY_EGF	NUYTTEN_EZH2_TARGETS_UP	KOINUMA_TARGETS_OF_SMAD2_OR_SMAD3		CHARAFE_BREAST_CANCER_LUMINAL_VS_BASAL_DN					HUANG_DASATINIB_RESISTANCE_UP										GO_TISSUE_DEVELOPMENT	HALLMARK_TNFA_SIGNALING_VIA_NFKB																GSE9988_LOW_LPS_VS_VEHICLE_TREATED_MONOCYTE_UP						GO_EPITHELIUM_DEVELOPMENT
7262	PHLDA2	pleckstrin homology-like domain, family A, member 2		ZWANG_CLASS_1_TRANSIENTLY_INDUCED_BY_EGF	NUYTTEN_EZH2_TARGETS_UP	KOINUMA_TARGETS_OF_SMAD2_OR_SMAD3						WONG_ADULT_TISSUE_STEM_MODULE				KRIGE_RESPONSE_TO_TOSEDOSTAT_24HR_UP								HALLMARK_TNFA_SIGNALING_VIA_NFKB	CONCANNON_APOPTOSIS_BY_EPOXOMICIN_UP	NAGASHIMA_NRG1_SIGNALING_UP	GO_REGULATION_OF_CELLULAR_COMPONENT_MOVEMENT		BILD_HRAS_ONCOGENIC_SIGNATURE	GRAESSMANN_APOPTOSIS_BY_DOXORUBICIN_UP					LEE_BMP2_TARGETS_DN			KOBAYASHI_EGFR_SIGNALING_6HR_DN	GSE9988_LOW_LPS_VS_CTRL_TREATED_MONOCYTE_UP	GSE9988_LOW_LPS_VS_VEHICLE_TREATED_MONOCYTE_UP	GO_REGULATION_OF_MULTICELLULAR_ORGANISMAL_DEVELOPMENT
3725	JUN	jun proto-oncogene		ZWANG_CLASS_1_TRANSIENTLY_INDUCED_BY_EGF	NUYTTEN_EZH2_TARGETS_UP		PASINI_SUZ12_TARGETS_DN			DUTERTRE_ESTRADIOL_RESPONSE_24HR_DN		WONG_ADULT_TISSUE_STEM_MODULE		GO_REGULATION_OF_INTRACELLULAR_SIGNAL_TRANSDUCTION			GO_CELLULAR_RESPONSE_TO_STRESS		MITSIADES_RESPONSE_TO_APLIDIN_UP	GO_INTRACELLULAR_SIGNAL_TRANSDUCTION			GO_TISSUE_DEVELOPMENT	HALLMARK_TNFA_SIGNALING_VIA_NFKB	CONCANNON_APOPTOSIS_BY_EPOXOMICIN_UP	NAGASHIMA_NRG1_SIGNALING_UP	GO_REGULATION_OF_CELLULAR_COMPONENT_MOVEMENT				GO_REGULATION_OF_PHOSPHORUS_METABOLIC_PROCESS	GO_REGULATION_OF_PROTEIN_MODIFICATION_PROCESS		GO_REGULATION_OF_CELL_DEATH			GO_RESPONSE_TO_EXTERNAL_STIMULUS	KOBAYASHI_EGFR_SIGNALING_6HR_DN	GSE9988_LOW_LPS_VS_CTRL_TREATED_MONOCYTE_UP	GSE9988_LOW_LPS_VS_VEHICLE_TREATED_MONOCYTE_UP	GO_REGULATION_OF_MULTICELLULAR_ORGANISMAL_DEVELOPMENT		WINTER_HYPOXIA_METAGENE	GO_NUCLEIC_ACID_BINDING_TRANSCRIPTION_FACTOR_ACTIVITY	GO_POSITIVE_REGULATION_OF_CELL_COMMUNICATION	GO_EPITHELIUM_DEVELOPMENT		GO_POSITIVE_REGULATION_OF_RESPONSE_TO_STIMULUS
3909	LAMA3	laminin, alpha 3		ZWANG_CLASS_1_TRANSIENTLY_INDUCED_BY_EGF	NUYTTEN_EZH2_TARGETS_UP			CHARAFE_BREAST_CANCER_LUMINAL_VS_BASAL_DN															GO_TISSUE_DEVELOPMENT			NAGASHIMA_NRG1_SIGNALING_UP	GO_REGULATION_OF_CELLULAR_COMPONENT_MOVEMENT		BILD_HRAS_ONCOGENIC_SIGNATURE												GO_REGULATION_OF_MULTICELLULAR_ORGANISMAL_DEVELOPMENT					GO_EPITHELIUM_DEVELOPMENT
3572	IL6ST	interleukin 6 signal transducer (gp130, oncostatin M receptor)		ZWANG_CLASS_1_TRANSIENTLY_INDUCED_BY_EGF	NUYTTEN_EZH2_TARGETS_UP				GEORGES_TARGETS_OF_MIR192_AND_MIR215					GO_REGULATION_OF_INTRACELLULAR_SIGNAL_TRANSDUCTION	CUI_TCF21_TARGETS_2_DN			GO_NEGATIVE_REGULATION_OF_RESPONSE_TO_STIMULUS						HALLMARK_TNFA_SIGNALING_VIA_NFKB							GO_REGULATION_OF_PHOSPHORUS_METABOLIC_PROCESS	GO_REGULATION_OF_PROTEIN_MODIFICATION_PROCESS		GO_REGULATION_OF_CELL_DEATH							GO_REGULATION_OF_MULTICELLULAR_ORGANISMAL_DEVELOPMENT	GO_NEGATIVE_REGULATION_OF_CELL_COMMUNICATION			GO_POSITIVE_REGULATION_OF_CELL_COMMUNICATION			GO_POSITIVE_REGULATION_OF_RESPONSE_TO_STIMULUS
25819	CCRN4L	CCR4 carbon catabolite repression 4-like (S. cerevisiae)		ZWANG_CLASS_1_TRANSIENTLY_INDUCED_BY_EGF	NUYTTEN_EZH2_TARGETS_UP										CUI_TCF21_TARGETS_2_DN															GRAESSMANN_APOPTOSIS_BY_DOXORUBICIN_UP					LEE_BMP2_TARGETS_DN		GO_RESPONSE_TO_EXTERNAL_STIMULUS		GSE9988_LOW_LPS_VS_CTRL_TREATED_MONOCYTE_UP	GSE9988_LOW_LPS_VS_VEHICLE_TREATED_MONOCYTE_UP	GO_REGULATION_OF_MULTICELLULAR_ORGANISMAL_DEVELOPMENT			GO_NUCLEIC_ACID_BINDING_TRANSCRIPTION_FACTOR_ACTIVITY
2131	EXT1	exostosin 1		ZWANG_CLASS_1_TRANSIENTLY_INDUCED_BY_EGF		KOINUMA_TARGETS_OF_SMAD2_OR_SMAD3		CHARAFE_BREAST_CANCER_LUMINAL_VS_BASAL_DN		DUTERTRE_ESTRADIOL_RESPONSE_24HR_DN	CHARAFE_BREAST_CANCER_LUMINAL_VS_MESENCHYMAL_DN		HUANG_DASATINIB_RESISTANCE_UP						MITSIADES_RESPONSE_TO_APLIDIN_UP				GO_TISSUE_DEVELOPMENT										EGFR_UP.V1_UP				GO_RESPONSE_TO_EXTERNAL_STIMULUS										ENK_UV_RESPONSE_EPIDERMIS_DN
4233	MET	met proto-oncogene (hepatocyte growth factor receptor)		ZWANG_CLASS_1_TRANSIENTLY_INDUCED_BY_EGF		KOINUMA_TARGETS_OF_SMAD2_OR_SMAD3		CHARAFE_BREAST_CANCER_LUMINAL_VS_BASAL_DN			CHARAFE_BREAST_CANCER_LUMINAL_VS_MESENCHYMAL_DN		HUANG_DASATINIB_RESISTANCE_UP					GO_NEGATIVE_REGULATION_OF_RESPONSE_TO_STIMULUS					GO_TISSUE_DEVELOPMENT				GO_REGULATION_OF_CELLULAR_COMPONENT_MOVEMENT							GO_REGULATION_OF_CELL_DEATH			GO_RESPONSE_TO_EXTERNAL_STIMULUS						WINTER_HYPOXIA_METAGENE			GO_EPITHELIUM_DEVELOPMENT		GO_POSITIVE_REGULATION_OF_RESPONSE_TO_STIMULUS
9263	STK17A	serine/threonine kinase 17a		ZWANG_CLASS_1_TRANSIENTLY_INDUCED_BY_EGF		KOINUMA_TARGETS_OF_SMAD2_OR_SMAD3		CHARAFE_BREAST_CANCER_LUMINAL_VS_BASAL_DN			CHARAFE_BREAST_CANCER_LUMINAL_VS_MESENCHYMAL_DN								MITSIADES_RESPONSE_TO_APLIDIN_UP	GO_INTRACELLULAR_SIGNAL_TRANSDUCTION					CONCANNON_APOPTOSIS_BY_EPOXOMICIN_UP									GO_REGULATION_OF_CELL_DEATH															WANG_METHYLATED_IN_BREAST_CANCER
7039	TGFA	transforming growth factor, alpha		ZWANG_CLASS_1_TRANSIENTLY_INDUCED_BY_EGF		KOINUMA_TARGETS_OF_SMAD2_OR_SMAD3		CHARAFE_BREAST_CANCER_LUMINAL_VS_BASAL_DN						GO_REGULATION_OF_INTRACELLULAR_SIGNAL_TRANSDUCTION															BILD_HRAS_ONCOGENIC_SIGNATURE		GO_REGULATION_OF_PHOSPHORUS_METABOLIC_PROCESS	GO_REGULATION_OF_PROTEIN_MODIFICATION_PROCESS						KOBAYASHI_EGFR_SIGNALING_6HR_DN					WINTER_HYPOXIA_METAGENE		GO_POSITIVE_REGULATION_OF_CELL_COMMUNICATION		ENK_UV_RESPONSE_EPIDERMIS_DN	GO_POSITIVE_REGULATION_OF_RESPONSE_TO_STIMULUS
163259	DENND2C	DENN/MADD domain containing 2C		ZWANG_CLASS_1_TRANSIENTLY_INDUCED_BY_EGF		KOINUMA_TARGETS_OF_SMAD2_OR_SMAD3																							BILD_HRAS_ONCOGENIC_SIGNATURE
7042	TGFB2	transforming growth factor, beta 2		ZWANG_CLASS_1_TRANSIENTLY_INDUCED_BY_EGF			PASINI_SUZ12_TARGETS_DN			DUTERTRE_ESTRADIOL_RESPONSE_24HR_DN	CHARAFE_BREAST_CANCER_LUMINAL_VS_MESENCHYMAL_DN			GO_REGULATION_OF_INTRACELLULAR_SIGNAL_TRANSDUCTION				GO_NEGATIVE_REGULATION_OF_RESPONSE_TO_STIMULUS					GO_TISSUE_DEVELOPMENT			NAGASHIMA_NRG1_SIGNALING_UP	GO_REGULATION_OF_CELLULAR_COMPONENT_MOVEMENT		BILD_HRAS_ONCOGENIC_SIGNATURE		GO_REGULATION_OF_PHOSPHORUS_METABOLIC_PROCESS	GO_REGULATION_OF_PROTEIN_MODIFICATION_PROCESS	EGFR_UP.V1_UP	GO_REGULATION_OF_CELL_DEATH			GO_RESPONSE_TO_EXTERNAL_STIMULUS				GO_REGULATION_OF_MULTICELLULAR_ORGANISMAL_DEVELOPMENT	GO_NEGATIVE_REGULATION_OF_CELL_COMMUNICATION			GO_POSITIVE_REGULATION_OF_CELL_COMMUNICATION	GO_EPITHELIUM_DEVELOPMENT		GO_POSITIVE_REGULATION_OF_RESPONSE_TO_STIMULUS
57559	STAMBPL1	STAM binding protein-like 1		ZWANG_CLASS_1_TRANSIENTLY_INDUCED_BY_EGF				CHARAFE_BREAST_CANCER_LUMINAL_VS_BASAL_DN	GEORGES_TARGETS_OF_MIR192_AND_MIR215		CHARAFE_BREAST_CANCER_LUMINAL_VS_MESENCHYMAL_DN
1948	EFNB2	ephrin-B2		ZWANG_CLASS_1_TRANSIENTLY_INDUCED_BY_EGF					GEORGES_TARGETS_OF_MIR192_AND_MIR215	DUTERTRE_ESTRADIOL_RESPONSE_24HR_DN		WONG_ADULT_TISSUE_STEM_MODULE			CUI_TCF21_TARGETS_2_DN								GO_TISSUE_DEVELOPMENT							GRAESSMANN_APOPTOSIS_BY_DOXORUBICIN_UP							GO_RESPONSE_TO_EXTERNAL_STIMULUS				GO_REGULATION_OF_MULTICELLULAR_ORGANISMAL_DEVELOPMENT					GO_EPITHELIUM_DEVELOPMENT
84668	FAM126A	family with sequence similarity 126, member A		ZWANG_CLASS_1_TRANSIENTLY_INDUCED_BY_EGF					GEORGES_TARGETS_OF_MIR192_AND_MIR215		CHARAFE_BREAST_CANCER_LUMINAL_VS_MESENCHYMAL_DN
1836	SLC26A2	solute carrier family 26 (sulfate transporter), member 2		ZWANG_CLASS_1_TRANSIENTLY_INDUCED_BY_EGF					GEORGES_TARGETS_OF_MIR192_AND_MIR215
88455	ANKRD13A	ankyrin repeat domain 13A		ZWANG_CLASS_1_TRANSIENTLY_INDUCED_BY_EGF					GEORGES_TARGETS_OF_MIR192_AND_MIR215
5734	PTGER4	prostaglandin E receptor 4 (subtype EP4)		ZWANG_CLASS_1_TRANSIENTLY_INDUCED_BY_EGF						DUTERTRE_ESTRADIOL_RESPONSE_24HR_DN		WONG_ADULT_TISSUE_STEM_MODULE		GO_REGULATION_OF_INTRACELLULAR_SIGNAL_TRANSDUCTION	CUI_TCF21_TARGETS_2_DN		GO_CELLULAR_RESPONSE_TO_STRESS	GO_NEGATIVE_REGULATION_OF_RESPONSE_TO_STIMULUS		GO_INTRACELLULAR_SIGNAL_TRANSDUCTION				HALLMARK_TNFA_SIGNALING_VIA_NFKB			GO_REGULATION_OF_CELLULAR_COMPONENT_MOVEMENT			GRAESSMANN_APOPTOSIS_BY_DOXORUBICIN_UP	GO_REGULATION_OF_PHOSPHORUS_METABOLIC_PROCESS	GO_REGULATION_OF_PROTEIN_MODIFICATION_PROCESS				KRIGE_RESPONSE_TO_TOSEDOSTAT_6HR_UP	GO_RESPONSE_TO_EXTERNAL_STIMULUS		GSE9988_LOW_LPS_VS_CTRL_TREATED_MONOCYTE_UP		GO_REGULATION_OF_MULTICELLULAR_ORGANISMAL_DEVELOPMENT				GO_POSITIVE_REGULATION_OF_CELL_COMMUNICATION		ENK_UV_RESPONSE_EPIDERMIS_DN	GO_POSITIVE_REGULATION_OF_RESPONSE_TO_STIMULUS
3730	KAL1	Kallmann syndrome 1 sequence		ZWANG_CLASS_1_TRANSIENTLY_INDUCED_BY_EGF						DUTERTRE_ESTRADIOL_RESPONSE_24HR_DN																											GO_RESPONSE_TO_EXTERNAL_STIMULUS
54557	SGTB	small glutamine-rich tetratricopeptide repeat (TPR)-containing, beta		ZWANG_CLASS_1_TRANSIENTLY_INDUCED_BY_EGF							CHARAFE_BREAST_CANCER_LUMINAL_VS_MESENCHYMAL_DN					KRIGE_RESPONSE_TO_TOSEDOSTAT_24HR_UP																				KRIGE_RESPONSE_TO_TOSEDOSTAT_6HR_UP
9001	HAP1	huntingtin-associated protein 1		ZWANG_CLASS_1_TRANSIENTLY_INDUCED_BY_EGF										GO_REGULATION_OF_INTRACELLULAR_SIGNAL_TRANSDUCTION													GO_REGULATION_OF_CELLULAR_COMPONENT_MOVEMENT			GRAESSMANN_APOPTOSIS_BY_DOXORUBICIN_UP											GO_REGULATION_OF_MULTICELLULAR_ORGANISMAL_DEVELOPMENT		WINTER_HYPOXIA_METAGENE		GO_POSITIVE_REGULATION_OF_CELL_COMMUNICATION			GO_POSITIVE_REGULATION_OF_RESPONSE_TO_STIMULUS
57522	SRGAP1	SLIT-ROBO Rho GTPase activating protein 1		ZWANG_CLASS_1_TRANSIENTLY_INDUCED_BY_EGF										GO_REGULATION_OF_INTRACELLULAR_SIGNAL_TRANSDUCTION													GO_REGULATION_OF_CELLULAR_COMPONENT_MOVEMENT
200894	ARL13B	ADP-ribosylation factor-like 13B		ZWANG_CLASS_1_TRANSIENTLY_INDUCED_BY_EGF											CUI_TCF21_TARGETS_2_DN					GO_INTRACELLULAR_SIGNAL_TRANSDUCTION			GO_TISSUE_DEVELOPMENT																							GO_EPITHELIUM_DEVELOPMENT
30811	HUNK	hormonally up-regulated Neu-associated kinase		ZWANG_CLASS_1_TRANSIENTLY_INDUCED_BY_EGF																GO_INTRACELLULAR_SIGNAL_TRANSDUCTION
6617	SNAPC1	small nuclear RNA activating complex, polypeptide 1, 43kDa		ZWANG_CLASS_1_TRANSIENTLY_INDUCED_BY_EGF																													EGFR_UP.V1_UP
10602	CDC42EP3	CDC42 effector protein (Rho GTPase binding) 3			NUYTTEN_EZH2_TARGETS_UP	KOINUMA_TARGETS_OF_SMAD2_OR_SMAD3		CHARAFE_BREAST_CANCER_LUMINAL_VS_BASAL_DN					HUANG_DASATINIB_RESISTANCE_UP		CUI_TCF21_TARGETS_2_DN					GO_INTRACELLULAR_SIGNAL_TRANSDUCTION						NAGASHIMA_NRG1_SIGNALING_UP				GRAESSMANN_APOPTOSIS_BY_DOXORUBICIN_UP
1906	EDN1	endothelin 1			NUYTTEN_EZH2_TARGETS_UP	KOINUMA_TARGETS_OF_SMAD2_OR_SMAD3				DUTERTRE_ESTRADIOL_RESPONSE_24HR_DN				GO_REGULATION_OF_INTRACELLULAR_SIGNAL_TRANSDUCTION			GO_CELLULAR_RESPONSE_TO_STRESS	GO_NEGATIVE_REGULATION_OF_RESPONSE_TO_STIMULUS		GO_INTRACELLULAR_SIGNAL_TRANSDUCTION			GO_TISSUE_DEVELOPMENT	HALLMARK_TNFA_SIGNALING_VIA_NFKB		NAGASHIMA_NRG1_SIGNALING_UP	GO_REGULATION_OF_CELLULAR_COMPONENT_MOVEMENT	ZWANG_CLASS_3_TRANSIENTLY_INDUCED_BY_EGF			GO_REGULATION_OF_PHOSPHORUS_METABOLIC_PROCESS	GO_REGULATION_OF_PROTEIN_MODIFICATION_PROCESS	EGFR_UP.V1_UP	GO_REGULATION_OF_CELL_DEATH			GO_RESPONSE_TO_EXTERNAL_STIMULUS		GSE9988_LOW_LPS_VS_CTRL_TREATED_MONOCYTE_UP	GSE9988_LOW_LPS_VS_VEHICLE_TREATED_MONOCYTE_UP	GO_REGULATION_OF_MULTICELLULAR_ORGANISMAL_DEVELOPMENT	GO_NEGATIVE_REGULATION_OF_CELL_COMMUNICATION	WINTER_HYPOXIA_METAGENE		GO_POSITIVE_REGULATION_OF_CELL_COMMUNICATION	GO_EPITHELIUM_DEVELOPMENT		GO_POSITIVE_REGULATION_OF_RESPONSE_TO_STIMULUS
8091	HMGA2	high mobility group AT-hook 2			NUYTTEN_EZH2_TARGETS_UP		PASINI_SUZ12_TARGETS_DN	CHARAFE_BREAST_CANCER_LUMINAL_VS_BASAL_DN			CHARAFE_BREAST_CANCER_LUMINAL_VS_MESENCHYMAL_DN						GO_CELLULAR_RESPONSE_TO_STRESS	GO_NEGATIVE_REGULATION_OF_RESPONSE_TO_STIMULUS					GO_TISSUE_DEVELOPMENT											GO_REGULATION_OF_CELL_DEATH			GO_RESPONSE_TO_EXTERNAL_STIMULUS	KOBAYASHI_EGFR_SIGNALING_6HR_DN						GO_NUCLEIC_ACID_BINDING_TRANSCRIPTION_FACTOR_ACTIVITY				GO_POSITIVE_REGULATION_OF_RESPONSE_TO_STIMULUS
7168	TPM1	tropomyosin 1 (alpha)			NUYTTEN_EZH2_TARGETS_UP		PASINI_SUZ12_TARGETS_DN				CHARAFE_BREAST_CANCER_LUMINAL_VS_MESENCHYMAL_DN	WONG_ADULT_TISSUE_STEM_MODULE			CUI_TCF21_TARGETS_2_DN		GO_CELLULAR_RESPONSE_TO_STRESS						GO_TISSUE_DEVELOPMENT				GO_REGULATION_OF_CELLULAR_COMPONENT_MOVEMENT		BILD_HRAS_ONCOGENIC_SIGNATURE
10100	TSPAN2	tetraspanin 2			NUYTTEN_EZH2_TARGETS_UP		PASINI_SUZ12_TARGETS_DN								CUI_TCF21_TARGETS_2_DN
79627	OGFRL1	opioid growth factor receptor-like 1			NUYTTEN_EZH2_TARGETS_UP			CHARAFE_BREAST_CANCER_LUMINAL_VS_BASAL_DN	GEORGES_TARGETS_OF_MIR192_AND_MIR215							KRIGE_RESPONSE_TO_TOSEDOSTAT_24HR_UP														GRAESSMANN_APOPTOSIS_BY_DOXORUBICIN_UP						KRIGE_RESPONSE_TO_TOSEDOSTAT_6HR_UP
3383	ICAM1	intercellular adhesion molecule 1			NUYTTEN_EZH2_TARGETS_UP			CHARAFE_BREAST_CANCER_LUMINAL_VS_BASAL_DN				WONG_ADULT_TISSUE_STEM_MODULE		GO_REGULATION_OF_INTRACELLULAR_SIGNAL_TRANSDUCTION			GO_CELLULAR_RESPONSE_TO_STRESS	GO_NEGATIVE_REGULATION_OF_RESPONSE_TO_STIMULUS	MITSIADES_RESPONSE_TO_APLIDIN_UP				GO_TISSUE_DEVELOPMENT	HALLMARK_TNFA_SIGNALING_VIA_NFKB			GO_REGULATION_OF_CELLULAR_COMPONENT_MOVEMENT				GO_REGULATION_OF_PHOSPHORUS_METABOLIC_PROCESS	GO_REGULATION_OF_PROTEIN_MODIFICATION_PROCESS	EGFR_UP.V1_UP	GO_REGULATION_OF_CELL_DEATH			GO_RESPONSE_TO_EXTERNAL_STIMULUS		GSE9988_LOW_LPS_VS_CTRL_TREATED_MONOCYTE_UP	GSE9988_LOW_LPS_VS_VEHICLE_TREATED_MONOCYTE_UP		GO_NEGATIVE_REGULATION_OF_CELL_COMMUNICATION	WINTER_HYPOXIA_METAGENE		GO_POSITIVE_REGULATION_OF_CELL_COMMUNICATION	GO_EPITHELIUM_DEVELOPMENT		GO_POSITIVE_REGULATION_OF_RESPONSE_TO_STIMULUS
1540	CYLD	cylindromatosis (turban tumor syndrome)			NUYTTEN_EZH2_TARGETS_UP			CHARAFE_BREAST_CANCER_LUMINAL_VS_BASAL_DN						GO_REGULATION_OF_INTRACELLULAR_SIGNAL_TRANSDUCTION		KRIGE_RESPONSE_TO_TOSEDOSTAT_24HR_UP		GO_NEGATIVE_REGULATION_OF_RESPONSE_TO_STIMULUS		GO_INTRACELLULAR_SIGNAL_TRANSDUCTION														GO_REGULATION_OF_CELL_DEATH		KRIGE_RESPONSE_TO_TOSEDOSTAT_6HR_UP					GO_REGULATION_OF_MULTICELLULAR_ORGANISMAL_DEVELOPMENT	GO_NEGATIVE_REGULATION_OF_CELL_COMMUNICATION			GO_POSITIVE_REGULATION_OF_CELL_COMMUNICATION			GO_POSITIVE_REGULATION_OF_RESPONSE_TO_STIMULUS
330	BIRC3	baculoviral IAP repeat containing 3			NUYTTEN_EZH2_TARGETS_UP			CHARAFE_BREAST_CANCER_LUMINAL_VS_BASAL_DN						GO_REGULATION_OF_INTRACELLULAR_SIGNAL_TRANSDUCTION						GO_INTRACELLULAR_SIGNAL_TRANSDUCTION				HALLMARK_TNFA_SIGNALING_VIA_NFKB				ZWANG_CLASS_3_TRANSIENTLY_INDUCED_BY_EGF				GO_REGULATION_OF_PROTEIN_MODIFICATION_PROCESS		GO_REGULATION_OF_CELL_DEATH					GSE9988_LOW_LPS_VS_CTRL_TREATED_MONOCYTE_UP	GSE9988_LOW_LPS_VS_VEHICLE_TREATED_MONOCYTE_UP					GO_POSITIVE_REGULATION_OF_CELL_COMMUNICATION			GO_POSITIVE_REGULATION_OF_RESPONSE_TO_STIMULUS
151195	CCNYL1	cyclin Y-like 1			NUYTTEN_EZH2_TARGETS_UP			CHARAFE_BREAST_CANCER_LUMINAL_VS_BASAL_DN																							GO_REGULATION_OF_PHOSPHORUS_METABOLIC_PROCESS	GO_REGULATION_OF_PROTEIN_MODIFICATION_PROCESS			LEE_BMP2_TARGETS_DN
64398	MPP5	membrane protein, palmitoylated 5 (MAGUK p55 subfamily member 5)			NUYTTEN_EZH2_TARGETS_UP				GEORGES_TARGETS_OF_MIR192_AND_MIR215						CUI_TCF21_TARGETS_2_DN	KRIGE_RESPONSE_TO_TOSEDOSTAT_24HR_UP							GO_TISSUE_DEVELOPMENT																							GO_EPITHELIUM_DEVELOPMENT
23306	TMEM194A	transmembrane protein 194A			NUYTTEN_EZH2_TARGETS_UP				GEORGES_TARGETS_OF_MIR192_AND_MIR215													ZWANG_TRANSIENTLY_UP_BY_1ST_EGF_PULSE_ONLY													LEE_BMP2_TARGETS_DN				GSE9988_LOW_LPS_VS_CTRL_TREATED_MONOCYTE_UP	GSE9988_LOW_LPS_VS_VEHICLE_TREATED_MONOCYTE_UP
10745	PHTF1	putative homeodomain transcription factor 1			NUYTTEN_EZH2_TARGETS_UP				GEORGES_TARGETS_OF_MIR192_AND_MIR215																CONCANNON_APOPTOSIS_BY_EPOXOMICIN_UP																			GO_NUCLEIC_ACID_BINDING_TRANSCRIPTION_FACTOR_ACTIVITY
10514	MYBBP1A	MYB binding protein (P160) 1a			NUYTTEN_EZH2_TARGETS_UP												GO_CELLULAR_RESPONSE_TO_STRESS			GO_INTRACELLULAR_SIGNAL_TRANSDUCTION														GO_REGULATION_OF_CELL_DEATH	LEE_BMP2_TARGETS_DN		GO_RESPONSE_TO_EXTERNAL_STIMULUS
80110	ZNF614	zinc finger protein 614			NUYTTEN_EZH2_TARGETS_UP																REACTOME_GENERIC_TRANSCRIPTION_PATHWAY
7675	ZNF121	zinc finger protein 121			NUYTTEN_EZH2_TARGETS_UP																	ZWANG_TRANSIENTLY_UP_BY_1ST_EGF_PULSE_ONLY																						GO_NUCLEIC_ACID_BINDING_TRANSCRIPTION_FACTOR_ACTIVITY
9674	KIAA0040	KIAA0040			NUYTTEN_EZH2_TARGETS_UP																							ZWANG_CLASS_3_TRANSIENTLY_INDUCED_BY_EGF
51191	HERC5	hect domain and RLD 5			NUYTTEN_EZH2_TARGETS_UP																										GO_REGULATION_OF_PHOSPHORUS_METABOLIC_PROCESS	GO_REGULATION_OF_PROTEIN_MODIFICATION_PROCESS					GO_RESPONSE_TO_EXTERNAL_STIMULUS
84419	C15orf48	chromosome 15 open reading frame 48			NUYTTEN_EZH2_TARGETS_UP
91351	DDX60L	DEAD (Asp-Glu-Ala-Asp) box polypeptide 60-like			NUYTTEN_EZH2_TARGETS_UP
57700	FAM160B1	family with sequence similarity 160, member B1			NUYTTEN_EZH2_TARGETS_UP
28962	OSTM1	osteopetrosis associated transmembrane protein 1			NUYTTEN_EZH2_TARGETS_UP
353322	ANKRD37	ankyrin repeat domain 37			NUYTTEN_EZH2_TARGETS_UP
857	CAV1	caveolin 1, caveolae protein, 22kDa				KOINUMA_TARGETS_OF_SMAD2_OR_SMAD3	PASINI_SUZ12_TARGETS_DN	CHARAFE_BREAST_CANCER_LUMINAL_VS_BASAL_DN			CHARAFE_BREAST_CANCER_LUMINAL_VS_MESENCHYMAL_DN	WONG_ADULT_TISSUE_STEM_MODULE	HUANG_DASATINIB_RESISTANCE_UP	GO_REGULATION_OF_INTRACELLULAR_SIGNAL_TRANSDUCTION			GO_CELLULAR_RESPONSE_TO_STRESS	GO_NEGATIVE_REGULATION_OF_RESPONSE_TO_STIMULUS		GO_INTRACELLULAR_SIGNAL_TRANSDUCTION			GO_TISSUE_DEVELOPMENT				GO_REGULATION_OF_CELLULAR_COMPONENT_MOVEMENT				GO_REGULATION_OF_PHOSPHORUS_METABOLIC_PROCESS	GO_REGULATION_OF_PROTEIN_MODIFICATION_PROCESS		GO_REGULATION_OF_CELL_DEATH			GO_RESPONSE_TO_EXTERNAL_STIMULUS				GO_REGULATION_OF_MULTICELLULAR_ORGANISMAL_DEVELOPMENT	GO_NEGATIVE_REGULATION_OF_CELL_COMMUNICATION			GO_POSITIVE_REGULATION_OF_CELL_COMMUNICATION			GO_POSITIVE_REGULATION_OF_RESPONSE_TO_STIMULUS	WANG_METHYLATED_IN_BREAST_CANCER
2152	F3	coagulation factor III (thromboplastin, tissue factor)				KOINUMA_TARGETS_OF_SMAD2_OR_SMAD3	PASINI_SUZ12_TARGETS_DN	CHARAFE_BREAST_CANCER_LUMINAL_VS_BASAL_DN				WONG_ADULT_TISSUE_STEM_MODULE	HUANG_DASATINIB_RESISTANCE_UP	GO_REGULATION_OF_INTRACELLULAR_SIGNAL_TRANSDUCTION			GO_CELLULAR_RESPONSE_TO_STRESS							HALLMARK_TNFA_SIGNALING_VIA_NFKB			GO_REGULATION_OF_CELLULAR_COMPONENT_MOVEMENT							GO_REGULATION_OF_CELL_DEATH			GO_RESPONSE_TO_EXTERNAL_STIMULUS	KOBAYASHI_EGFR_SIGNALING_6HR_DN	GSE9988_LOW_LPS_VS_CTRL_TREATED_MONOCYTE_UP	GSE9988_LOW_LPS_VS_VEHICLE_TREATED_MONOCYTE_UP	GO_REGULATION_OF_MULTICELLULAR_ORGANISMAL_DEVELOPMENT		WINTER_HYPOXIA_METAGENE		GO_POSITIVE_REGULATION_OF_CELL_COMMUNICATION		ENK_UV_RESPONSE_EPIDERMIS_DN	GO_POSITIVE_REGULATION_OF_RESPONSE_TO_STIMULUS	WANG_METHYLATED_IN_BREAST_CANCER
1848	DUSP6	dual specificity phosphatase 6				KOINUMA_TARGETS_OF_SMAD2_OR_SMAD3	PASINI_SUZ12_TARGETS_DN							GO_REGULATION_OF_INTRACELLULAR_SIGNAL_TRANSDUCTION	CUI_TCF21_TARGETS_2_DN	KRIGE_RESPONSE_TO_TOSEDOSTAT_24HR_UP		GO_NEGATIVE_REGULATION_OF_RESPONSE_TO_STIMULUS	MITSIADES_RESPONSE_TO_APLIDIN_UP	GO_INTRACELLULAR_SIGNAL_TRANSDUCTION									BILD_HRAS_ONCOGENIC_SIGNATURE	GRAESSMANN_APOPTOSIS_BY_DOXORUBICIN_UP	GO_REGULATION_OF_PHOSPHORUS_METABOLIC_PROCESS	GO_REGULATION_OF_PROTEIN_MODIFICATION_PROCESS	EGFR_UP.V1_UP	GO_REGULATION_OF_CELL_DEATH		KRIGE_RESPONSE_TO_TOSEDOSTAT_6HR_UP		KOBAYASHI_EGFR_SIGNALING_6HR_DN			GO_REGULATION_OF_MULTICELLULAR_ORGANISMAL_DEVELOPMENT	GO_NEGATIVE_REGULATION_OF_CELL_COMMUNICATION			GO_POSITIVE_REGULATION_OF_CELL_COMMUNICATION		ENK_UV_RESPONSE_EPIDERMIS_DN	GO_POSITIVE_REGULATION_OF_RESPONSE_TO_STIMULUS
22936	ELL2	elongation factor, RNA polymerase II, 2				KOINUMA_TARGETS_OF_SMAD2_OR_SMAD3		CHARAFE_BREAST_CANCER_LUMINAL_VS_BASAL_DN	GEORGES_TARGETS_OF_MIR192_AND_MIR215			WONG_ADULT_TISSUE_STEM_MODULE	HUANG_DASATINIB_RESISTANCE_UP		CUI_TCF21_TARGETS_2_DN										CONCANNON_APOPTOSIS_BY_EPOXOMICIN_UP			ZWANG_CLASS_3_TRANSIENTLY_INDUCED_BY_EGF					EGFR_UP.V1_UP						GSE9988_LOW_LPS_VS_CTRL_TREATED_MONOCYTE_UP				WINTER_HYPOXIA_METAGENE				ENK_UV_RESPONSE_EPIDERMIS_DN
1969	EPHA2	EPH receptor A2				KOINUMA_TARGETS_OF_SMAD2_OR_SMAD3		CHARAFE_BREAST_CANCER_LUMINAL_VS_BASAL_DN			CHARAFE_BREAST_CANCER_LUMINAL_VS_MESENCHYMAL_DN		HUANG_DASATINIB_RESISTANCE_UP	GO_REGULATION_OF_INTRACELLULAR_SIGNAL_TRANSDUCTION			GO_CELLULAR_RESPONSE_TO_STRESS	GO_NEGATIVE_REGULATION_OF_RESPONSE_TO_STIMULUS		GO_INTRACELLULAR_SIGNAL_TRANSDUCTION			GO_TISSUE_DEVELOPMENT			NAGASHIMA_NRG1_SIGNALING_UP	GO_REGULATION_OF_CELLULAR_COMPONENT_MOVEMENT	ZWANG_CLASS_3_TRANSIENTLY_INDUCED_BY_EGF	BILD_HRAS_ONCOGENIC_SIGNATURE	GRAESSMANN_APOPTOSIS_BY_DOXORUBICIN_UP	GO_REGULATION_OF_PHOSPHORUS_METABOLIC_PROCESS	GO_REGULATION_OF_PROTEIN_MODIFICATION_PROCESS					GO_RESPONSE_TO_EXTERNAL_STIMULUS	KOBAYASHI_EGFR_SIGNALING_6HR_DN			GO_REGULATION_OF_MULTICELLULAR_ORGANISMAL_DEVELOPMENT	GO_NEGATIVE_REGULATION_OF_CELL_COMMUNICATION				GO_EPITHELIUM_DEVELOPMENT	ENK_UV_RESPONSE_EPIDERMIS_DN		WANG_METHYLATED_IN_BREAST_CANCER
3475	IFRD1	interferon-related developmental regulator 1				KOINUMA_TARGETS_OF_SMAD2_OR_SMAD3			GEORGES_TARGETS_OF_MIR192_AND_MIR215						CUI_TCF21_TARGETS_2_DN	KRIGE_RESPONSE_TO_TOSEDOSTAT_24HR_UP			MITSIADES_RESPONSE_TO_APLIDIN_UP				GO_TISSUE_DEVELOPMENT		CONCANNON_APOPTOSIS_BY_EPOXOMICIN_UP	NAGASHIMA_NRG1_SIGNALING_UP									LEE_BMP2_TARGETS_DN	KRIGE_RESPONSE_TO_TOSEDOSTAT_6HR_UP					GO_REGULATION_OF_MULTICELLULAR_ORGANISMAL_DEVELOPMENT
10892	MALT1	mucosa associated lymphoid tissue lymphoma translocation gene 1				KOINUMA_TARGETS_OF_SMAD2_OR_SMAD3					CHARAFE_BREAST_CANCER_LUMINAL_VS_MESENCHYMAL_DN			GO_REGULATION_OF_INTRACELLULAR_SIGNAL_TRANSDUCTION	CUI_TCF21_TARGETS_2_DN					GO_INTRACELLULAR_SIGNAL_TRANSDUCTION											GO_REGULATION_OF_PHOSPHORUS_METABOLIC_PROCESS	GO_REGULATION_OF_PROTEIN_MODIFICATION_PROCESS		GO_REGULATION_OF_CELL_DEATH			GO_RESPONSE_TO_EXTERNAL_STIMULUS								GO_POSITIVE_REGULATION_OF_CELL_COMMUNICATION			GO_POSITIVE_REGULATION_OF_RESPONSE_TO_STIMULUS
27071	DAPP1	dual adaptor of phosphotyrosine and 3-phosphoinositides				KOINUMA_TARGETS_OF_SMAD2_OR_SMAD3						WONG_ADULT_TISSUE_STEM_MODULE				KRIGE_RESPONSE_TO_TOSEDOSTAT_24HR_UP						ZWANG_TRANSIENTLY_UP_BY_1ST_EGF_PULSE_ONLY														KRIGE_RESPONSE_TO_TOSEDOSTAT_6HR_UP
4286	MITF	microphthalmia-associated transcription factor				KOINUMA_TARGETS_OF_SMAD2_OR_SMAD3						WONG_ADULT_TISSUE_STEM_MODULE											GO_TISSUE_DEVELOPMENT							GRAESSMANN_APOPTOSIS_BY_DOXORUBICIN_UP				GO_REGULATION_OF_CELL_DEATH							GO_REGULATION_OF_MULTICELLULAR_ORGANISMAL_DEVELOPMENT			GO_NUCLEIC_ACID_BINDING_TRANSCRIPTION_FACTOR_ACTIVITY		GO_EPITHELIUM_DEVELOPMENT
60485	SAV1	salvador homolog 1 (Drosophila)				KOINUMA_TARGETS_OF_SMAD2_OR_SMAD3														GO_INTRACELLULAR_SIGNAL_TRANSDUCTION			GO_TISSUE_DEVELOPMENT											GO_REGULATION_OF_CELL_DEATH	LEE_BMP2_TARGETS_DN				GSE9988_LOW_LPS_VS_CTRL_TREATED_MONOCYTE_UP	GSE9988_LOW_LPS_VS_VEHICLE_TREATED_MONOCYTE_UP	GO_REGULATION_OF_MULTICELLULAR_ORGANISMAL_DEVELOPMENT					GO_EPITHELIUM_DEVELOPMENT
112840	WDR89	WD repeat domain 89				KOINUMA_TARGETS_OF_SMAD2_OR_SMAD3
284119	PTRF	polymerase I and transcript release factor					PASINI_SUZ12_TARGETS_DN	CHARAFE_BREAST_CANCER_LUMINAL_VS_BASAL_DN			CHARAFE_BREAST_CANCER_LUMINAL_VS_MESENCHYMAL_DN		HUANG_DASATINIB_RESISTANCE_UP		CUI_TCF21_TARGETS_2_DN															GRAESSMANN_APOPTOSIS_BY_DOXORUBICIN_UP																			WANG_METHYLATED_IN_BREAST_CANCER
182	JAG1	jagged 1					PASINI_SUZ12_TARGETS_DN	CHARAFE_BREAST_CANCER_LUMINAL_VS_BASAL_DN			CHARAFE_BREAST_CANCER_LUMINAL_VS_MESENCHYMAL_DN		HUANG_DASATINIB_RESISTANCE_UP			KRIGE_RESPONSE_TO_TOSEDOSTAT_24HR_UP							GO_TISSUE_DEVELOPMENT	HALLMARK_TNFA_SIGNALING_VIA_NFKB			GO_REGULATION_OF_CELLULAR_COMPONENT_MOVEMENT	ZWANG_CLASS_3_TRANSIENTLY_INDUCED_BY_EGF								KRIGE_RESPONSE_TO_TOSEDOSTAT_6HR_UP					GO_REGULATION_OF_MULTICELLULAR_ORGANISMAL_DEVELOPMENT				GO_POSITIVE_REGULATION_OF_CELL_COMMUNICATION	GO_EPITHELIUM_DEVELOPMENT		GO_POSITIVE_REGULATION_OF_RESPONSE_TO_STIMULUS
27295	PDLIM3	PDZ and LIM domain 3					PASINI_SUZ12_TARGETS_DN		GEORGES_TARGETS_OF_MIR192_AND_MIR215			WONG_ADULT_TISSUE_STEM_MODULE							MITSIADES_RESPONSE_TO_APLIDIN_UP						CONCANNON_APOPTOSIS_BY_EPOXOMICIN_UP
22836	RHOBTB3	Rho-related BTB domain containing 3					PASINI_SUZ12_TARGETS_DN		GEORGES_TARGETS_OF_MIR192_AND_MIR215							KRIGE_RESPONSE_TO_TOSEDOSTAT_24HR_UP				GO_INTRACELLULAR_SIGNAL_TRANSDUCTION		ZWANG_TRANSIENTLY_UP_BY_1ST_EGF_PULSE_ONLY														KRIGE_RESPONSE_TO_TOSEDOSTAT_6HR_UP
2239	GPC4	glypican 4					PASINI_SUZ12_TARGETS_DN		GEORGES_TARGETS_OF_MIR192_AND_MIR215																																GO_REGULATION_OF_MULTICELLULAR_ORGANISMAL_DEVELOPMENT
1000	CDH2	cadherin 2, type 1, N-cadherin (neuronal)					PASINI_SUZ12_TARGETS_DN			DUTERTRE_ESTRADIOL_RESPONSE_24HR_DN		WONG_ADULT_TISSUE_STEM_MODULE		GO_REGULATION_OF_INTRACELLULAR_SIGNAL_TRANSDUCTION				GO_NEGATIVE_REGULATION_OF_RESPONSE_TO_STIMULUS					GO_TISSUE_DEVELOPMENT								GO_REGULATION_OF_PHOSPHORUS_METABOLIC_PROCESS	GO_REGULATION_OF_PROTEIN_MODIFICATION_PROCESS									GO_REGULATION_OF_MULTICELLULAR_ORGANISMAL_DEVELOPMENT	GO_NEGATIVE_REGULATION_OF_CELL_COMMUNICATION			GO_POSITIVE_REGULATION_OF_CELL_COMMUNICATION	GO_EPITHELIUM_DEVELOPMENT		GO_POSITIVE_REGULATION_OF_RESPONSE_TO_STIMULUS
23034	SAMD4A	sterile alpha motif domain containing 4A					PASINI_SUZ12_TARGETS_DN			DUTERTRE_ESTRADIOL_RESPONSE_24HR_DN					CUI_TCF21_TARGETS_2_DN							ZWANG_TRANSIENTLY_UP_BY_1ST_EGF_PULSE_ONLY											EGFR_UP.V1_UP		LEE_BMP2_TARGETS_DN
51465	UBE2J1	ubiquitin-conjugating enzyme E2, J1, U					PASINI_SUZ12_TARGETS_DN			DUTERTRE_ESTRADIOL_RESPONSE_24HR_DN							GO_CELLULAR_RESPONSE_TO_STRESS	GO_NEGATIVE_REGULATION_OF_RESPONSE_TO_STIMULUS																						GSE9988_LOW_LPS_VS_VEHICLE_TREATED_MONOCYTE_UP
9200	PTPLA	protein tyrosine phosphatase-like (proline instead of catalytic arginine), member A					PASINI_SUZ12_TARGETS_DN				CHARAFE_BREAST_CANCER_LUMINAL_VS_MESENCHYMAL_DN												GO_TISSUE_DEVELOPMENT
157638	FAM84B	family with sequence similarity 84, member B					PASINI_SUZ12_TARGETS_DN																					ZWANG_CLASS_3_TRANSIENTLY_INDUCED_BY_EGF
9260	PDLIM7	PDZ and LIM domain 7 (enigma)					PASINI_SUZ12_TARGETS_DN																							GRAESSMANN_APOPTOSIS_BY_DOXORUBICIN_UP			EGFR_UP.V1_UP
25800	SLC39A6	solute carrier family 39 (zinc transporter), member 6					PASINI_SUZ12_TARGETS_DN																												LEE_BMP2_TARGETS_DN
23208	SYT11	synaptotagmin XI					PASINI_SUZ12_TARGETS_DN																																			GO_NEGATIVE_REGULATION_OF_CELL_COMMUNICATION
394	ARHGAP5	Rho GTPase activating protein 5						CHARAFE_BREAST_CANCER_LUMINAL_VS_BASAL_DN		DUTERTRE_ESTRADIOL_RESPONSE_24HR_DN				GO_REGULATION_OF_INTRACELLULAR_SIGNAL_TRANSDUCTION	CUI_TCF21_TARGETS_2_DN					GO_INTRACELLULAR_SIGNAL_TRANSDUCTION																							WINTER_HYPOXIA_METAGENE
10627	MYL12A	myosin, light chain 12A, regulatory, non-sarcomeric						CHARAFE_BREAST_CANCER_LUMINAL_VS_BASAL_DN		DUTERTRE_ESTRADIOL_RESPONSE_24HR_DN						KRIGE_RESPONSE_TO_TOSEDOSTAT_24HR_UP																				KRIGE_RESPONSE_TO_TOSEDOSTAT_6HR_UP
6624	FSCN1	fascin homolog 1, actin-bundling protein (Strongylocentrotus purpuratus)						CHARAFE_BREAST_CANCER_LUMINAL_VS_BASAL_DN			CHARAFE_BREAST_CANCER_LUMINAL_VS_MESENCHYMAL_DN																								LEE_BMP2_TARGETS_DN												ENK_UV_RESPONSE_EPIDERMIS_DN
2707	GJB3	gap junction protein, beta 3, 31kDa						CHARAFE_BREAST_CANCER_LUMINAL_VS_BASAL_DN																					BILD_HRAS_ONCOGENIC_SIGNATURE																		ENK_UV_RESPONSE_EPIDERMIS_DN		WANG_METHYLATED_IN_BREAST_CANCER
116068	LYSMD3	LysM, putative peptidoglycan-binding, domain containing 3							GEORGES_TARGETS_OF_MIR192_AND_MIR215	DUTERTRE_ESTRADIOL_RESPONSE_24HR_DN		WONG_ADULT_TISSUE_STEM_MODULE			CUI_TCF21_TARGETS_2_DN
8850	KAT2B	K(lysine) acetyltransferase 2B							GEORGES_TARGETS_OF_MIR192_AND_MIR215	DUTERTRE_ESTRADIOL_RESPONSE_24HR_DN						KRIGE_RESPONSE_TO_TOSEDOSTAT_24HR_UP	GO_CELLULAR_RESPONSE_TO_STRESS				REACTOME_GENERIC_TRANSCRIPTION_PATHWAY	ZWANG_TRANSIENTLY_UP_BY_1ST_EGF_PULSE_ONLY									GO_REGULATION_OF_PHOSPHORUS_METABOLIC_PROCESS	GO_REGULATION_OF_PROTEIN_MODIFICATION_PROCESS				KRIGE_RESPONSE_TO_TOSEDOSTAT_6HR_UP					GO_REGULATION_OF_MULTICELLULAR_ORGANISMAL_DEVELOPMENT
57157	PHTF2	putative homeodomain transcription factor 2							GEORGES_TARGETS_OF_MIR192_AND_MIR215			WONG_ADULT_TISSUE_STEM_MODULE
2074	ERCC6	excision repair cross-complementing rodent repair deficiency, complementation group 6							GEORGES_TARGETS_OF_MIR192_AND_MIR215					GO_REGULATION_OF_INTRACELLULAR_SIGNAL_TRANSDUCTION			GO_CELLULAR_RESPONSE_TO_STRESS			GO_INTRACELLULAR_SIGNAL_TRANSDUCTION											GO_REGULATION_OF_PHOSPHORUS_METABOLIC_PROCESS	GO_REGULATION_OF_PROTEIN_MODIFICATION_PROCESS													GO_POSITIVE_REGULATION_OF_CELL_COMMUNICATION			GO_POSITIVE_REGULATION_OF_RESPONSE_TO_STIMULUS
113263	GLCCI1	glucocorticoid induced transcript 1							GEORGES_TARGETS_OF_MIR192_AND_MIR215						CUI_TCF21_TARGETS_2_DN							ZWANG_TRANSIENTLY_UP_BY_1ST_EGF_PULSE_ONLY							BILD_HRAS_ONCOGENIC_SIGNATURE	GRAESSMANN_APOPTOSIS_BY_DOXORUBICIN_UP
7773	ZNF230	zinc finger protein 230							GEORGES_TARGETS_OF_MIR192_AND_MIR215							KRIGE_RESPONSE_TO_TOSEDOSTAT_24HR_UP					REACTOME_GENERIC_TRANSCRIPTION_PATHWAY															KRIGE_RESPONSE_TO_TOSEDOSTAT_6HR_UP
85015	USP45	ubiquitin specific peptidase 45							GEORGES_TARGETS_OF_MIR192_AND_MIR215								GO_CELLULAR_RESPONSE_TO_STRESS					ZWANG_TRANSIENTLY_UP_BY_1ST_EGF_PULSE_ONLY													LEE_BMP2_TARGETS_DN
5865	RAB3B	RAB3B, member RAS oncogene family							GEORGES_TARGETS_OF_MIR192_AND_MIR215											GO_INTRACELLULAR_SIGNAL_TRANSDUCTION																									GO_POSITIVE_REGULATION_OF_CELL_COMMUNICATION
81856	ZNF611	zinc finger protein 611							GEORGES_TARGETS_OF_MIR192_AND_MIR215												REACTOME_GENERIC_TRANSCRIPTION_PATHWAY	ZWANG_TRANSIENTLY_UP_BY_1ST_EGF_PULSE_ONLY																						GO_NUCLEIC_ACID_BINDING_TRANSCRIPTION_FACTOR_ACTIVITY
64282	PAPD5	PAP associated domain containing 5							GEORGES_TARGETS_OF_MIR192_AND_MIR215													ZWANG_TRANSIENTLY_UP_BY_1ST_EGF_PULSE_ONLY
160418	TMTC3	transmembrane and tetratricopeptide repeat containing 3							GEORGES_TARGETS_OF_MIR192_AND_MIR215																				BILD_HRAS_ONCOGENIC_SIGNATURE
993	CDC25A	cell division cycle 25 homolog A (S. pombe)							GEORGES_TARGETS_OF_MIR192_AND_MIR215																					GRAESSMANN_APOPTOSIS_BY_DOXORUBICIN_UP	GO_REGULATION_OF_PHOSPHORUS_METABOLIC_PROCESS	GO_REGULATION_OF_PROTEIN_MODIFICATION_PROCESS			LEE_BMP2_TARGETS_DN														WANG_METHYLATED_IN_BREAST_CANCER
284323	ZNF780A	zinc finger protein 780A							GEORGES_TARGETS_OF_MIR192_AND_MIR215																																			GO_NUCLEIC_ACID_BINDING_TRANSCRIPTION_FACTOR_ACTIVITY
55721	IQCC	IQ motif containing C							GEORGES_TARGETS_OF_MIR192_AND_MIR215
23252	OTUD3	OTU domain containing 3							GEORGES_TARGETS_OF_MIR192_AND_MIR215
83853	ROPN1L	rhophilin associated tail protein 1-like							GEORGES_TARGETS_OF_MIR192_AND_MIR215
3912	LAMB1	laminin, beta 1								DUTERTRE_ESTRADIOL_RESPONSE_24HR_DN	CHARAFE_BREAST_CANCER_LUMINAL_VS_MESENCHYMAL_DN	WONG_ADULT_TISSUE_STEM_MODULE											GO_TISSUE_DEVELOPMENT				GO_REGULATION_OF_CELLULAR_COMPONENT_MOVEMENT
2037	EPB41L2	erythrocyte membrane protein band 4.1-like 2								DUTERTRE_ESTRADIOL_RESPONSE_24HR_DN	CHARAFE_BREAST_CANCER_LUMINAL_VS_MESENCHYMAL_DN
9099	USP2	ubiquitin specific peptidase 2								DUTERTRE_ESTRADIOL_RESPONSE_24HR_DN		WONG_ADULT_TISSUE_STEM_MODULE										ZWANG_TRANSIENTLY_UP_BY_1ST_EGF_PULSE_ONLY								GRAESSMANN_APOPTOSIS_BY_DOXORUBICIN_UP							GO_RESPONSE_TO_EXTERNAL_STIMULUS				GO_REGULATION_OF_MULTICELLULAR_ORGANISMAL_DEVELOPMENT
9429	ABCG2	ATP-binding cassette, sub-family G (WHITE), member 2								DUTERTRE_ESTRADIOL_RESPONSE_24HR_DN		WONG_ADULT_TISSUE_STEM_MODULE																									GO_RESPONSE_TO_EXTERNAL_STIMULUS
84144	SYDE2	synapse defective 1, Rho GTPase, homolog 2 (C. elegans)								DUTERTRE_ESTRADIOL_RESPONSE_24HR_DN				GO_REGULATION_OF_INTRACELLULAR_SIGNAL_TRANSDUCTION
57669	EPB41L5	erythrocyte membrane protein band 4.1 like 5								DUTERTRE_ESTRADIOL_RESPONSE_24HR_DN													GO_TISSUE_DEVELOPMENT				GO_REGULATION_OF_CELLULAR_COMPONENT_MOVEMENT														GO_REGULATION_OF_MULTICELLULAR_ORGANISMAL_DEVELOPMENT					GO_EPITHELIUM_DEVELOPMENT
3229	HOXC13	homeobox C13								DUTERTRE_ESTRADIOL_RESPONSE_24HR_DN													GO_TISSUE_DEVELOPMENT																					GO_NUCLEIC_ACID_BINDING_TRANSCRIPTION_FACTOR_ACTIVITY		GO_EPITHELIUM_DEVELOPMENT
9021	SOCS3	suppressor of cytokine signaling 3									CHARAFE_BREAST_CANCER_LUMINAL_VS_MESENCHYMAL_DN	WONG_ADULT_TISSUE_STEM_MODULE		GO_REGULATION_OF_INTRACELLULAR_SIGNAL_TRANSDUCTION				GO_NEGATIVE_REGULATION_OF_RESPONSE_TO_STIMULUS		GO_INTRACELLULAR_SIGNAL_TRANSDUCTION			GO_TISSUE_DEVELOPMENT	HALLMARK_TNFA_SIGNALING_VIA_NFKB				ZWANG_CLASS_3_TRANSIENTLY_INDUCED_BY_EGF			GO_REGULATION_OF_PHOSPHORUS_METABOLIC_PROCESS	GO_REGULATION_OF_PROTEIN_MODIFICATION_PROCESS		GO_REGULATION_OF_CELL_DEATH			GO_RESPONSE_TO_EXTERNAL_STIMULUS		GSE9988_LOW_LPS_VS_CTRL_TREATED_MONOCYTE_UP	GSE9988_LOW_LPS_VS_VEHICLE_TREATED_MONOCYTE_UP		GO_NEGATIVE_REGULATION_OF_CELL_COMMUNICATION			GO_POSITIVE_REGULATION_OF_CELL_COMMUNICATION	GO_EPITHELIUM_DEVELOPMENT		GO_POSITIVE_REGULATION_OF_RESPONSE_TO_STIMULUS
7003	TEAD1	TEA domain family member 1 (SV40 transcriptional enhancer factor)									CHARAFE_BREAST_CANCER_LUMINAL_VS_MESENCHYMAL_DN									GO_INTRACELLULAR_SIGNAL_TRANSDUCTION	REACTOME_GENERIC_TRANSCRIPTION_PATHWAY	ZWANG_TRANSIENTLY_UP_BY_1ST_EGF_PULSE_ONLY																						GO_NUCLEIC_ACID_BINDING_TRANSCRIPTION_FACTOR_ACTIVITY
388610	TRNP1	TMF1-regulated nuclear protein 1									CHARAFE_BREAST_CANCER_LUMINAL_VS_MESENCHYMAL_DN
84056	KATNAL1	katanin p60 subunit A-like 1									CHARAFE_BREAST_CANCER_LUMINAL_VS_MESENCHYMAL_DN
5836	PYGL	phosphorylase, glycogen, liver									CHARAFE_BREAST_CANCER_LUMINAL_VS_MESENCHYMAL_DN
7474	WNT5A	wingless-type MMTV integration site family, member 5A										WONG_ADULT_TISSUE_STEM_MODULE		GO_REGULATION_OF_INTRACELLULAR_SIGNAL_TRANSDUCTION			GO_CELLULAR_RESPONSE_TO_STRESS	GO_NEGATIVE_REGULATION_OF_RESPONSE_TO_STIMULUS		GO_INTRACELLULAR_SIGNAL_TRANSDUCTION			GO_TISSUE_DEVELOPMENT				GO_REGULATION_OF_CELLULAR_COMPONENT_MOVEMENT				GO_REGULATION_OF_PHOSPHORUS_METABOLIC_PROCESS	GO_REGULATION_OF_PROTEIN_MODIFICATION_PROCESS	EGFR_UP.V1_UP	GO_REGULATION_OF_CELL_DEATH			GO_RESPONSE_TO_EXTERNAL_STIMULUS				GO_REGULATION_OF_MULTICELLULAR_ORGANISMAL_DEVELOPMENT	GO_NEGATIVE_REGULATION_OF_CELL_COMMUNICATION		GO_NUCLEIC_ACID_BINDING_TRANSCRIPTION_FACTOR_ACTIVITY	GO_POSITIVE_REGULATION_OF_CELL_COMMUNICATION	GO_EPITHELIUM_DEVELOPMENT		GO_POSITIVE_REGULATION_OF_RESPONSE_TO_STIMULUS
595	CCND1	cyclin D1										WONG_ADULT_TISSUE_STEM_MODULE					GO_CELLULAR_RESPONSE_TO_STRESS	GO_NEGATIVE_REGULATION_OF_RESPONSE_TO_STIMULUS				ZWANG_TRANSIENTLY_UP_BY_1ST_EGF_PULSE_ONLY	GO_TISSUE_DEVELOPMENT	HALLMARK_TNFA_SIGNALING_VIA_NFKB							GO_REGULATION_OF_PHOSPHORUS_METABOLIC_PROCESS	GO_REGULATION_OF_PROTEIN_MODIFICATION_PROCESS					GO_RESPONSE_TO_EXTERNAL_STIMULUS	KOBAYASHI_EGFR_SIGNALING_6HR_DN			GO_REGULATION_OF_MULTICELLULAR_ORGANISMAL_DEVELOPMENT	GO_NEGATIVE_REGULATION_OF_CELL_COMMUNICATION				GO_EPITHELIUM_DEVELOPMENT	ENK_UV_RESPONSE_EPIDERMIS_DN
254428	SLC41A1	solute carrier family 41, member 1										WONG_ADULT_TISSUE_STEM_MODULE
84527	ZNF559	zinc finger protein 559											HUANG_DASATINIB_RESISTANCE_UP								REACTOME_GENERIC_TRANSCRIPTION_PATHWAY
3678	ITGA5	integrin, alpha 5 (fibronectin receptor, alpha polypeptide)											HUANG_DASATINIB_RESISTANCE_UP										GO_TISSUE_DEVELOPMENT				GO_REGULATION_OF_CELLULAR_COMPONENT_MOVEMENT				GO_REGULATION_OF_PHOSPHORUS_METABOLIC_PROCESS	GO_REGULATION_OF_PROTEIN_MODIFICATION_PROCESS		GO_REGULATION_OF_CELL_DEATH							GO_REGULATION_OF_MULTICELLULAR_ORGANISMAL_DEVELOPMENT		WINTER_HYPOXIA_METAGENE		GO_POSITIVE_REGULATION_OF_CELL_COMMUNICATION	GO_EPITHELIUM_DEVELOPMENT		GO_POSITIVE_REGULATION_OF_RESPONSE_TO_STIMULUS
84803	AGPAT9	1-acylglycerol-3-phosphate O-acyltransferase 9												GO_REGULATION_OF_INTRACELLULAR_SIGNAL_TRANSDUCTION		KRIGE_RESPONSE_TO_TOSEDOSTAT_24HR_UP													BILD_HRAS_ONCOGENIC_SIGNATURE							KRIGE_RESPONSE_TO_TOSEDOSTAT_6HR_UP
9641	IKBKE	inhibitor of kappa light polypeptide gene enhancer in B-cells, kinase epsilon												GO_REGULATION_OF_INTRACELLULAR_SIGNAL_TRANSDUCTION			GO_CELLULAR_RESPONSE_TO_STRESS			GO_INTRACELLULAR_SIGNAL_TRANSDUCTION										GRAESSMANN_APOPTOSIS_BY_DOXORUBICIN_UP							GO_RESPONSE_TO_EXTERNAL_STIMULUS								GO_POSITIVE_REGULATION_OF_CELL_COMMUNICATION			GO_POSITIVE_REGULATION_OF_RESPONSE_TO_STIMULUS
84451	KIAA1804	mixed lineage kinase 4												GO_REGULATION_OF_INTRACELLULAR_SIGNAL_TRANSDUCTION			GO_CELLULAR_RESPONSE_TO_STRESS			GO_INTRACELLULAR_SIGNAL_TRANSDUCTION											GO_REGULATION_OF_PHOSPHORUS_METABOLIC_PROCESS	GO_REGULATION_OF_PROTEIN_MODIFICATION_PROCESS													GO_POSITIVE_REGULATION_OF_CELL_COMMUNICATION			GO_POSITIVE_REGULATION_OF_RESPONSE_TO_STIMULUS
51306	FAM13B	family with sequence similarity 13, member B												GO_REGULATION_OF_INTRACELLULAR_SIGNAL_TRANSDUCTION			GO_CELLULAR_RESPONSE_TO_STRESS																				GO_RESPONSE_TO_EXTERNAL_STIMULUS
2281	FKBP1B	FK506 binding protein 1B, 12.6 kDa												GO_REGULATION_OF_INTRACELLULAR_SIGNAL_TRANSDUCTION				GO_NEGATIVE_REGULATION_OF_RESPONSE_TO_STIMULUS		GO_INTRACELLULAR_SIGNAL_TRANSDUCTION											GO_REGULATION_OF_PHOSPHORUS_METABOLIC_PROCESS	GO_REGULATION_OF_PROTEIN_MODIFICATION_PROCESS					GO_RESPONSE_TO_EXTERNAL_STIMULUS				GO_REGULATION_OF_MULTICELLULAR_ORGANISMAL_DEVELOPMENT	GO_NEGATIVE_REGULATION_OF_CELL_COMMUNICATION						GO_POSITIVE_REGULATION_OF_RESPONSE_TO_STIMULUS
6615	SNAI1	snail homolog 1 (Drosophila)												GO_REGULATION_OF_INTRACELLULAR_SIGNAL_TRANSDUCTION				GO_NEGATIVE_REGULATION_OF_RESPONSE_TO_STIMULUS					GO_TISSUE_DEVELOPMENT				GO_REGULATION_OF_CELLULAR_COMPONENT_MOVEMENT							GO_REGULATION_OF_CELL_DEATH	LEE_BMP2_TARGETS_DN						GO_REGULATION_OF_MULTICELLULAR_ORGANISMAL_DEVELOPMENT	GO_NEGATIVE_REGULATION_OF_CELL_COMMUNICATION		GO_NUCLEIC_ACID_BINDING_TRANSCRIPTION_FACTOR_ACTIVITY		GO_EPITHELIUM_DEVELOPMENT
54700	RRN3	RRN3 RNA polymerase I transcription factor homolog (S. cerevisiae)												GO_REGULATION_OF_INTRACELLULAR_SIGNAL_TRANSDUCTION				GO_NEGATIVE_REGULATION_OF_RESPONSE_TO_STIMULUS							CONCANNON_APOPTOSIS_BY_EPOXOMICIN_UP									GO_REGULATION_OF_CELL_DEATH	LEE_BMP2_TARGETS_DN						GO_REGULATION_OF_MULTICELLULAR_ORGANISMAL_DEVELOPMENT	GO_NEGATIVE_REGULATION_OF_CELL_COMMUNICATION
5058	PAK1	p21 protein (Cdc42/Rac)-activated kinase 1												GO_REGULATION_OF_INTRACELLULAR_SIGNAL_TRANSDUCTION						GO_INTRACELLULAR_SIGNAL_TRANSDUCTION		ZWANG_TRANSIENTLY_UP_BY_1ST_EGF_PULSE_ONLY	GO_TISSUE_DEVELOPMENT				GO_REGULATION_OF_CELLULAR_COMPONENT_MOVEMENT				GO_REGULATION_OF_PHOSPHORUS_METABOLIC_PROCESS	GO_REGULATION_OF_PROTEIN_MODIFICATION_PROCESS													GO_POSITIVE_REGULATION_OF_CELL_COMMUNICATION	GO_EPITHELIUM_DEVELOPMENT		GO_POSITIVE_REGULATION_OF_RESPONSE_TO_STIMULUS
5423	POLB	polymerase (DNA directed), beta													CUI_TCF21_TARGETS_2_DN		GO_CELLULAR_RESPONSE_TO_STRESS		MITSIADES_RESPONSE_TO_APLIDIN_UP	GO_INTRACELLULAR_SIGNAL_TRANSDUCTION		ZWANG_TRANSIENTLY_UP_BY_1ST_EGF_PULSE_ONLY
9750	FAM65B	family with sequence similarity 65, member B													CUI_TCF21_TARGETS_2_DN								GO_TISSUE_DEVELOPMENT
3977	LIFR	leukemia inhibitory factor receptor alpha													CUI_TCF21_TARGETS_2_DN																			GO_REGULATION_OF_CELL_DEATH
7767	ZNF224	zinc finger protein 224														KRIGE_RESPONSE_TO_TOSEDOSTAT_24HR_UP					REACTOME_GENERIC_TRANSCRIPTION_PATHWAY	ZWANG_TRANSIENTLY_UP_BY_1ST_EGF_PULSE_ONLY														KRIGE_RESPONSE_TO_TOSEDOSTAT_6HR_UP								GO_NUCLEIC_ACID_BINDING_TRANSCRIPTION_FACTOR_ACTIVITY
84924	ZNF566	zinc finger protein 566														KRIGE_RESPONSE_TO_TOSEDOSTAT_24HR_UP					REACTOME_GENERIC_TRANSCRIPTION_PATHWAY															KRIGE_RESPONSE_TO_TOSEDOSTAT_6HR_UP
57688	ZSWIM6	zinc finger, SWIM-type containing 6														KRIGE_RESPONSE_TO_TOSEDOSTAT_24HR_UP											GO_REGULATION_OF_CELLULAR_COMPONENT_MOVEMENT	ZWANG_CLASS_3_TRANSIENTLY_INDUCED_BY_EGF								KRIGE_RESPONSE_TO_TOSEDOSTAT_6HR_UP					GO_REGULATION_OF_MULTICELLULAR_ORGANISMAL_DEVELOPMENT
63901	FAM111A	family with sequence similarity 111, member A														KRIGE_RESPONSE_TO_TOSEDOSTAT_24HR_UP																			LEE_BMP2_TARGETS_DN		GO_RESPONSE_TO_EXTERNAL_STIMULUS
55356	SLC22A15	solute carrier family 22, member 15														KRIGE_RESPONSE_TO_TOSEDOSTAT_24HR_UP																				KRIGE_RESPONSE_TO_TOSEDOSTAT_6HR_UP
1407	CRY1	cryptochrome 1 (photolyase-like)															GO_CELLULAR_RESPONSE_TO_STRESS	GO_NEGATIVE_REGULATION_OF_RESPONSE_TO_STIMULUS														GO_REGULATION_OF_PROTEIN_MODIFICATION_PROCESS			LEE_BMP2_TARGETS_DN		GO_RESPONSE_TO_EXTERNAL_STIMULUS					GO_NEGATIVE_REGULATION_OF_CELL_COMMUNICATION					ENK_UV_RESPONSE_EPIDERMIS_DN
100507436	MICA	MHC class I polypeptide-related sequence A															GO_CELLULAR_RESPONSE_TO_STRESS	GO_NEGATIVE_REGULATION_OF_RESPONSE_TO_STIMULUS																			GO_RESPONSE_TO_EXTERNAL_STIMULUS
79723	SUV39H2	suppressor of variegation 3-9 homolog 2 (Drosophila)															GO_CELLULAR_RESPONSE_TO_STRESS																		LEE_BMP2_TARGETS_DN
10569	SLU7	SLU7 splicing factor homolog (S. cerevisiae)															GO_CELLULAR_RESPONSE_TO_STRESS
4277	MICB	MHC class I polypeptide-related sequence B																GO_NEGATIVE_REGULATION_OF_RESPONSE_TO_STIMULUS							CONCANNON_APOPTOSIS_BY_EPOXOMICIN_UP																							GO_POSITIVE_REGULATION_OF_RESPONSE_TO_STIMULUS
83891	SNX25	sorting nexin 25																GO_NEGATIVE_REGULATION_OF_RESPONSE_TO_STIMULUS													GO_REGULATION_OF_PHOSPHORUS_METABOLIC_PROCESS	GO_REGULATION_OF_PROTEIN_MODIFICATION_PROCESS										GO_NEGATIVE_REGULATION_OF_CELL_COMMUNICATION
384	ARG2	arginase, type II																	MITSIADES_RESPONSE_TO_APLIDIN_UP			ZWANG_TRANSIENTLY_UP_BY_1ST_EGF_PULSE_ONLY	GO_TISSUE_DEVELOPMENT			NAGASHIMA_NRG1_SIGNALING_UP			BILD_HRAS_ONCOGENIC_SIGNATURE																	GO_EPITHELIUM_DEVELOPMENT
10866	HCP5	HLA complex P5 (non-protein coding)																	MITSIADES_RESPONSE_TO_APLIDIN_UP
8526	DGKE	diacylglycerol kinase, epsilon 64kDa																		GO_INTRACELLULAR_SIGNAL_TRANSDUCTION					CONCANNON_APOPTOSIS_BY_EPOXOMICIN_UP
5577	PRKAR2B	protein kinase, cAMP-dependent, regulatory, type II, beta																		GO_INTRACELLULAR_SIGNAL_TRANSDUCTION											GO_REGULATION_OF_PHOSPHORUS_METABOLIC_PROCESS	GO_REGULATION_OF_PROTEIN_MODIFICATION_PROCESS
118987	PDZD8	PDZ domain containing 8																		GO_INTRACELLULAR_SIGNAL_TRANSDUCTION
166614	DCLK2	doublecortin-like kinase 2																		GO_INTRACELLULAR_SIGNAL_TRANSDUCTION
59348	ZNF350	zinc finger protein 350																			REACTOME_GENERIC_TRANSCRIPTION_PATHWAY	ZWANG_TRANSIENTLY_UP_BY_1ST_EGF_PULSE_ONLY																						GO_NUCLEIC_ACID_BINDING_TRANSCRIPTION_FACTOR_ACTIVITY
162966	ZNF600	zinc finger protein 600																			REACTOME_GENERIC_TRANSCRIPTION_PATHWAY	ZWANG_TRANSIENTLY_UP_BY_1ST_EGF_PULSE_ONLY																						GO_NUCLEIC_ACID_BINDING_TRANSCRIPTION_FACTOR_ACTIVITY
90317	ZNF616	zinc finger protein 616																			REACTOME_GENERIC_TRANSCRIPTION_PATHWAY	ZWANG_TRANSIENTLY_UP_BY_1ST_EGF_PULSE_ONLY																						GO_NUCLEIC_ACID_BINDING_TRANSCRIPTION_FACTOR_ACTIVITY
199704	ZNF585A	zinc finger protein 585A																			REACTOME_GENERIC_TRANSCRIPTION_PATHWAY	ZWANG_TRANSIENTLY_UP_BY_1ST_EGF_PULSE_ONLY																						GO_NUCLEIC_ACID_BINDING_TRANSCRIPTION_FACTOR_ACTIVITY
7574	ZNF26	zinc finger protein 26																			REACTOME_GENERIC_TRANSCRIPTION_PATHWAY	ZWANG_TRANSIENTLY_UP_BY_1ST_EGF_PULSE_ONLY																						GO_NUCLEIC_ACID_BINDING_TRANSCRIPTION_FACTOR_ACTIVITY
57711	ZNF529	zinc finger protein 529																			REACTOME_GENERIC_TRANSCRIPTION_PATHWAY	ZWANG_TRANSIENTLY_UP_BY_1ST_EGF_PULSE_ONLY
7556	ZNF10	zinc finger protein 10																			REACTOME_GENERIC_TRANSCRIPTION_PATHWAY				CONCANNON_APOPTOSIS_BY_EPOXOMICIN_UP
147923	ZNF420	zinc finger protein 420																			REACTOME_GENERIC_TRANSCRIPTION_PATHWAY													GO_REGULATION_OF_CELL_DEATH										GO_NUCLEIC_ACID_BINDING_TRANSCRIPTION_FACTOR_ACTIVITY
147949	ZNF583	zinc finger protein 583																			REACTOME_GENERIC_TRANSCRIPTION_PATHWAY																							GO_NUCLEIC_ACID_BINDING_TRANSCRIPTION_FACTOR_ACTIVITY
90390	MED30	mediator complex subunit 30																			REACTOME_GENERIC_TRANSCRIPTION_PATHWAY
84246	MED10	mediator complex subunit 10																			REACTOME_GENERIC_TRANSCRIPTION_PATHWAY
84671	ZNF347	zinc finger protein 347																			REACTOME_GENERIC_TRANSCRIPTION_PATHWAY
163059	ZNF433	zinc finger protein 433																			REACTOME_GENERIC_TRANSCRIPTION_PATHWAY
7941	PLA2G7	phospholipase A2, group VII (platelet-activating factor acetylhydrolase, plasma)																				ZWANG_TRANSIENTLY_UP_BY_1ST_EGF_PULSE_ONLY					GO_REGULATION_OF_CELLULAR_COMPONENT_MOVEMENT																					GO_POSITIVE_REGULATION_OF_RESPONSE_TO_STIMULUS
80765	STARD5	StAR-related lipid transfer (START) domain containing 5																				ZWANG_TRANSIENTLY_UP_BY_1ST_EGF_PULSE_ONLY								GRAESSMANN_APOPTOSIS_BY_DOXORUBICIN_UP
3995	FADS3	fatty acid desaturase 3																				ZWANG_TRANSIENTLY_UP_BY_1ST_EGF_PULSE_ONLY											EGFR_UP.V1_UP		LEE_BMP2_TARGETS_DN
57678	GPAM	glycerol-3-phosphate acyltransferase, mitochondrial																				ZWANG_TRANSIENTLY_UP_BY_1ST_EGF_PULSE_ONLY												GO_REGULATION_OF_CELL_DEATH			GO_RESPONSE_TO_EXTERNAL_STIMULUS
5203	PFDN4	prefoldin subunit 4																				ZWANG_TRANSIENTLY_UP_BY_1ST_EGF_PULSE_ONLY													LEE_BMP2_TARGETS_DN
153443	SRFBP1	serum response factor binding protein 1																				ZWANG_TRANSIENTLY_UP_BY_1ST_EGF_PULSE_ONLY													LEE_BMP2_TARGETS_DN
54332	GDAP1	ganglioside-induced differentiation-associated protein 1																				ZWANG_TRANSIENTLY_UP_BY_1ST_EGF_PULSE_ONLY
8496	PPFIBP1	PTPRF interacting protein, binding protein 1 (liprin beta 1)																										ZWANG_CLASS_3_TRANSIENTLY_INDUCED_BY_EGF
85477	SCIN	scinderin																												GRAESSMANN_APOPTOSIS_BY_DOXORUBICIN_UP				GO_REGULATION_OF_CELL_DEATH							GO_REGULATION_OF_MULTICELLULAR_ORGANISMAL_DEVELOPMENT
56605	ERO1LB	ERO1-like beta (S. cerevisiae)																												GRAESSMANN_APOPTOSIS_BY_DOXORUBICIN_UP
9050	PSTPIP2	proline-serine-threonine phosphatase interacting protein 2																												GRAESSMANN_APOPTOSIS_BY_DOXORUBICIN_UP
117246	FTSJ3	FtsJ homolog 3 (E. coli)																												GRAESSMANN_APOPTOSIS_BY_DOXORUBICIN_UP
2170	FABP3	fatty acid binding protein 3, muscle and heart (mammary-derived growth inhibitor)																													GO_REGULATION_OF_PHOSPHORUS_METABOLIC_PROCESS
9015	TAF1A	TATA box binding protein (TBP)-associated factor, RNA polymerase I, A, 48kDa																															EGFR_UP.V1_UP
9188	DDX21	DEAD (Asp-Glu-Ala-Asp) box polypeptide 21																																	LEE_BMP2_TARGETS_DN	KRIGE_RESPONSE_TO_TOSEDOSTAT_6HR_UP	GO_RESPONSE_TO_EXTERNAL_STIMULUS										ENK_UV_RESPONSE_EPIDERMIS_DN
10799	RPP40	ribonuclease P/MRP 40kDa subunit																																	LEE_BMP2_TARGETS_DN	KRIGE_RESPONSE_TO_TOSEDOSTAT_6HR_UP
1736	DKC1	dyskeratosis congenita 1, dyskerin																																	LEE_BMP2_TARGETS_DN								WINTER_HYPOXIA_METAGENE
6949	TCOF1	Treacher Collins-Franceschetti syndrome 1																																	LEE_BMP2_TARGETS_DN
5631	PRPS1	phosphoribosyl pyrophosphate synthetase 1																																	LEE_BMP2_TARGETS_DN
55055	ZWILCH	Zwilch, kinetochore associated, homolog (Drosophila)																																	LEE_BMP2_TARGETS_DN
51154	MRTO4	mRNA turnover 4 homolog (S. cerevisiae)																																	LEE_BMP2_TARGETS_DN
57478	USP31	ubiquitin specific peptidase 31																																	LEE_BMP2_TARGETS_DN
6785	ELOVL4	ELOVL fatty acid elongase 4																																			GO_RESPONSE_TO_EXTERNAL_STIMULUS
23036	ZNF292	zinc finger protein 292																																										GO_NUCLEIC_ACID_BINDING_TRANSCRIPTION_FACTOR_ACTIVITY
54989	ZNF770	zinc finger protein 770																																										GO_NUCLEIC_ACID_BINDING_TRANSCRIPTION_FACTOR_ACTIVITY
25850	ZNF345	zinc finger protein 345																																										GO_NUCLEIC_ACID_BINDING_TRANSCRIPTION_FACTOR_ACTIVITY
388536	ZNF790	zinc finger protein 790																																										GO_NUCLEIC_ACID_BINDING_TRANSCRIPTION_FACTOR_ACTIVITY
92283	ZNF461	zinc finger protein 461																																										GO_NUCLEIC_ACID_BINDING_TRANSCRIPTION_FACTOR_ACTIVITY
163131	ZNF780B	zinc finger protein 780B																																										GO_NUCLEIC_ACID_BINDING_TRANSCRIPTION_FACTOR_ACTIVITY
388566	ZNF470	zinc finger protein 470																																										GO_NUCLEIC_ACID_BINDING_TRANSCRIPTION_FACTOR_ACTIVITY
79659	DYNC2H1	dynein, cytoplasmic 2, heavy chain 1																																											GO_POSITIVE_REGULATION_OF_CELL_COMMUNICATION			GO_POSITIVE_REGULATION_OF_RESPONSE_TO_STIMULUS
4673	NAP1L1	nucleosome assembly protein 1-like 1
10329	TMEM5	transmembrane protein 5
55145	THAP1	THAP domain containing, apoptosis associated protein 1
54955	C1orf109	chromosome 1 open reading frame 109
54491	FAM105A	family with sequence similarity 105, member A
54855	FAM46C	family with sequence similarity 46, member C
29919	C18orf8	chromosome 18 open reading frame 8
93058	COQ10A	coenzyme Q10 homolog A (S. cerevisiae)
55621	TRMT1	TRM1 tRNA methyltransferase 1 homolog (S. cerevisiae)
84294	UTP23	UTP23, small subunit (SSU) processome component, homolog (yeast)
161835	FSIP1	fibrous sheath interacting protein 1
54839	LRRC49	leucine rich repeat containing 49
55106	SLFN12	schlafen family member 12
79836	LONRF3	LON peptidase N-terminal domain and ring finger 3
60558	GUF1	GUF1 GTPase homolog (S. cerevisiae)
170850	KCNG3	potassium voltage-gated channel, subfamily G, member 3
9648	GCC2	GRIP and coiled-coil domain containing 2
55341	LSG1	large subunit GTPase 1 homolog (S. cerevisiae)
51202	DDX47	DEAD (Asp-Glu-Ala-Asp) box polypeptide 47
54802	TRIT1	tRNA isopentenyltransferase 1
79611	ACSS3	acyl-CoA synthetase short-chain family member 3
338657	CCDC84	coiled-coil domain containing 84
79725	THAP9	THAP domain containing 9
91368	CDKN2AIPNL	CDKN2A interacting protein N-terminal like
113246	C12orf57	chromosome 12 open reading frame 57
282763	OR51B5	olfactory receptor, family 51, subfamily B, member 5
339263	C17orf51	chromosome 17 open reading frame 51
[truncated: 53 more columns]

## Sheet: SUM159
Overlap Results
Collection(s):	C1, C2, C3, C4, C5, C6, C7, H
# overlaps shown:	100
# genesets in collections:	17810
# genes in comparison (n):	172
# genes in universe (N):	45956
Gene Set Name	# Genes in Gene Set (K)	Description	# Genes in Overlap (k)	k/K	p-value	FDR q-value
TIEN_INTESTINE_PROBIOTICS_24HR_UP	557	Genes up-regulated in Caco-2 cells (intestinal epithelium) after coculture with the probiotic bacteria L. casei for 24h.	24	0.0431	1.58E-18	2.81E-14
BENPORATH_CYCLING_GENES	648	Genes showing cell-cycle stage-specific expression [PMID=12058064].	24	0.0370	4.81E-17	4.28E-13
NUYTTEN_EZH2_TARGETS_DN	1024	Genes down-regulated in PC3 cells (prostate cancer) after knockdown of EZH2 [GeneID=2146] by RNAi.	28	0.0273	2.31E-16	1.37E-12
FISCHER_DREAM_TARGETS	929	Target genes of the DREAM complex.	26	0.0280	1.74E-15	7.73E-12
GEORGES_TARGETS_OF_MIR192_AND_MIR215	893	Genes down-regulated in HCT116 cells (colon cancer) by expression of MIR192 or MIR215 [GeneID=406967;406997] at 24 h.	24	0.0269	5.54E-14	1.85E-10
GOBERT_OLIGODENDROCYTE_DIFFERENTIATION_UP	570	Genes up-regulated during later stage of differentiation of Oli-Neu cells (oligodendroglial precursor) in response to PD174265 [PubChem=4709].	20	0.0351	6.23E-14	1.85E-10
GO_ENZYME_BINDING	1737	Interacting selectively and non-covalently with any enzyme.	32	0.0184	8.17E-14	2.08E-10
NUYTTEN_NIPP1_TARGETS_DN	848	Genes down-regulated in PC3 cells (prostate cancer) after knockdown of NIPP1 [GeneID=5511] by RNAi.	21	0.0248	1.07E-11	2.39E-8
PUJANA_BRCA1_PCC_NETWORK	1652	Genes constituting the BRCA1-PCC network of transcripts whose expression positively correlated (Pearson correlation coefficient, PCC >= 0.4) with that of BRCA1 [GeneID=672] across a compendium of normal tissues.	27	0.0163	1.32E-10	2.6E-7
GO_REGULATION_OF_CELLULAR_RESPONSE_TO_STRESS	691	Any process that modulates the frequency, rate or extent of a cellular response to stress. Cellular response to stress is a change in state or activity of a cell (in terms of movement, secretion, enzyme production, gene expression, etc.) as a result of a stimulus indicating the organism is under stress. The stress is usually, but not necessarily, exogenous (e.g. temperature, humidity, ionizing ra…	18	0.0260	1.56E-10	2.78E-7
PUJANA_ATM_PCC_NETWORK	1442	Genes constituting the ATM-PCC network of transcripts whose expression positively correlated (Pearson correlation coefficient, PCC >= 0.4) with that of ATM [GeneID=472] across a compendium of normal tissues.	25	0.0173	2.04E-10	3.31E-7
GSE21670_UNTREATED_VS_TGFB_IL6_TREATED_CD4_TCELL_UP	199	Genes up-regulated in CD4 [GeneID=920] T cells: medium versus TGF beta and IL6 [GeneID=3569].	11	0.0553	2.92E-10	3.82E-7
GO_REGULATION_OF_RESPONSE_TO_STRESS	1468	Any process that modulates the frequency, rate or extent of a response to stress. Response to stress is a change in state or activity of a cell or an organism (in terms of movement, secretion, enzyme production, gene expression, etc.) as a result of a disturbance in organismal or cellular homeostasis, usually, but not necessarily, exogenous (e.g. temperature, humidity, ionizing radiation).	25	0.0170	2.96E-10	3.82E-7
GO_CELLULAR_RESPONSE_TO_DNA_DAMAGE_STIMULUS	720	Any process that results in a change in state or activity of a cell (in terms of movement, secretion, enzyme production, gene expression, etc.) as a result of a stimulus indicating damage to its DNA from environmental insults or errors during metabolism.	18	0.0250	3E-10	3.82E-7
DUTERTRE_ESTRADIOL_RESPONSE_24HR_UP	324	Genes up-regulated in MCF7 cells (breast cancer) at 24 h of estradiol [PubChem=5757] treatment.	13	0.0401	3.57E-10	3.83E-7
MARSON_BOUND_BY_E2F4_UNSTIMULATED	728	Genes with promoters bound by E2F4 [GeneID=1874] in unstimulated hybridoma cells.	18	0.0247	3.58E-10	3.83E-7
BRUINS_UVC_RESPONSE_LATE	1137	Late response genes: differentially expressed only 12 h after UV-C irradiation of MEF cells (embryonic fibroblast).	22	0.0193	3.66E-10	3.83E-7
MODULE_54	263	Cell cycle (expression cluster).	12	0.0456	4.04E-10	3.99E-7
GO_MULTICELLULAR_ORGANISM_REPRODUCTION	768	The biological process in which new individuals are produced by one or two multicellular organisms. The new individuals inherit some proportion of their genetic material from the parent or parents.	18	0.0234	8.34E-10	7.82E-7
FISCHER_G2_M_CELL_CYCLE	225	Cell cycle genes with peak expression in G2/M check point.	11	0.0489	1.07E-9	9.26E-7
GO_CELLULAR_RESPONSE_TO_STRESS	1565	Any process that results in a change in state or activity of a cell (in terms of movement, secretion, enzyme production, gene expression, etc.) as a result of a stimulus indicating the organism is under stress. The stress is usually, but not necessarily, exogenous (e.g. temperature, humidity, ionizing radiation).	25	0.0160	1.09E-9	9.26E-7
DODD_NASOPHARYNGEAL_CARCINOMA_DN	1375	Genes down-regulated in nasopharyngeal carcinoma (NPC) compared to the normal tissue.	23	0.0167	2.28E-9	1.85E-6
GO_CATALYTIC_COMPLEX	1038	A protein complex which is capable of catalytic activity.	20	0.0193	2.63E-9	2.04E-6
KINSEY_TARGETS_OF_EWSR1_FLII_FUSION_UP	1278	Genes up-regulated in TC71 and EWS502 cells (Ewing's sarcoma) by EWSR1-FLI1 [GeneID=2130;2314] as inferred from RNAi knockdown of this fusion protein.	22	0.0172	3.13E-9	2.32E-6
GO_REPRODUCTION	1297	The production of new individuals that contain some portion of genetic material inherited from one or more parent organisms.	22	0.0170	4.08E-9	2.91E-6
GO_REGULATION_OF_RESPONSE_TO_DNA_DAMAGE_STIMULUS	145	Any process that modulates the frequency, rate or extent of response to DNA damage stimulus.	9	0.0621	4.58E-9	3.13E-6
GO_DNA_METABOLIC_PROCESS	758	Any cellular metabolic process involving deoxyribonucleic acid. This is one of the two main types of nucleic acid, consisting of a long, unbranched macromolecule formed from one, or more commonly, two, strands of linked deoxyribonucleotides.	17	0.0224	4.84E-9	3.19E-6
GOLDRATH_EFF_VS_MEMORY_CD8_TCELL_UP	200	Genes up-regulated in comparison of effector CD8 T cells versus memory CD8 T cells.	10	0.0500	5.05E-9	3.19E-6
GO_MALE_GAMETE_GENERATION	486	Generation of the male gamete; specialised haploid cells produced by meiosis and along with a female gamete takes part in sexual reproduction.	14	0.0288	5.25E-9	3.19E-6
SCHAEFFER_PROSTATE_DEVELOPMENT_48HR_UP	487	Genes up-regulated in the urogenital sinus (UGS) of day E16 females exposed to the androgen dihydrotestosterone [PubChem=10635] for 48 h.	14	0.0287	5.39E-9	3.19E-6
FUJII_YBX1_TARGETS_DN	202	Genes down-regulated in MCF-7 cells (breast cancer) after knockdown of YBX1 [GeneID=4904] by RNAi.	10	0.0495	5.55E-9	3.19E-6
LU_EZH2_TARGETS_DN	414	Genes down-regulated in SKOV3ip1 cells (ovarian cancer) upon knockdown of EZH2 [GeneID=2146] by RNAi.	13	0.0314	6.81E-9	3.79E-6
GO_BASE_EXCISION_REPAIR	39	In base excision repair, an altered base is removed by a DNA glycosylase enzyme, followed by excision of the resulting sugar phosphate. The small gap left in the DNA helix is filled in by the sequential action of DNA polymerase and DNA ligase.	6	0.1538	7.42E-9	4E-6
LEE_EARLY_T_LYMPHOCYTE_UP	107	Genes up-regulated at early stages of progenitor T lymphocyte maturation compared to the late stages.	8	0.0748	7.77E-9	4.07E-6
GO_MULTI_ORGANISM_REPRODUCTIVE_PROCESS	891	A biological process that directly contributes to the process of producing new individuals, involving another organism.	18	0.0202	8.38E-9	4.26E-6
GO_GAMETE_GENERATION	595	The generation and maintenance of gametes in a multicellular organism. A gamete is a haploid reproductive cell.	15	0.0252	8.71E-9	4.31E-6
GO_CHROMOSOME_ORGANIZATION	1009	A process that is carried out at the cellular level that results in the assembly, arrangement of constituent parts, or disassembly of chromosomes, structures composed of a very long molecule of DNA and associated proteins that carries hereditary information. This term covers covalent modifications at the molecular level as well as spatial relationships among the major components of a chromosome.	19	0.0188	9.73E-9	4.68E-6
GO_DNA_RECOMBINATION	215	Any process in which a new genotype is formed by reassortment of genes resulting in gene combinations different from those that were present in the parents. In eukaryotes genetic recombination can occur by chromosome assortment, intrachromosomal recombination, or nonreciprocal interchromosomal recombination. Intrachromosomal recombination occurs by crossing over. In bacteria it may occur by genet…	10	0.0465	1.01E-8	4.72E-6
WHITFIELD_CELL_CYCLE_S	162	Genes periodically expressed in synchronized HeLa cells (cervical carcinoma), with peak during the S phase of cell cycle.	9	0.0556	1.21E-8	5.51E-6
NUYTTEN_EZH2_TARGETS_UP	1037	Genes up-regulated in PC3 cells (prostate cancer) after knockdown of EZH2 [GeneID=2146] by RNAi.	19	0.0183	1.5E-8	6.69E-6
GO_ESTABLISHMENT_OF_LOCALIZATION_IN_CELL	1676	The directed movement of a substance or cellular entity, such as a protein complex or organelle, to a specific location within, or in the membrane of, a cell.	24	0.0143	1.97E-8	8.57E-6
GSE4984_UNTREATED_VS_VEHICLE_CTRL_TREATED_DC_DN	173	Genes down-regulated in monocyte-derived dendritic cells: untreated versus vehicle.	9	0.0520	2.14E-8	9.06E-6
GO_HYDROLASE_ACTIVITY_ACTING_ON_ESTER_BONDS	739	Catalysis of the hydrolysis of any ester bond.	16	0.0217	2.28E-8	9.45E-6
GO_MICROTUBULE_CYTOSKELETON	1068	The part of the cytoskeleton (the internal framework of a cell) composed of microtubules and associated proteins.	19	0.0178	2.39E-8	9.69E-6
PILON_KLF1_TARGETS_DN	1972	Genes down-regulated in erythroid progenitor cells from fetal livers of E13.5 embryos with KLF1 [GeneID=10661] knockout compared to those from the wild type embryos.	26	0.0132	2.51E-8	9.93E-6
ZHOU_CELL_CYCLE_GENES_IN_IR_RESPONSE_24HR	128	Cell cycle genes significantly (p =< 0.05) changed in fibroblast cells at 24 h after exposure to ionizing radiation.	8	0.0625	3.19E-8	1.23E-5
GO_ENVELOPE	1090	A multilayered structure surrounding all or part of a cell; encompasses one or more lipid bilayers, and may include a cell wall layer; also includes the space between layers.	19	0.0174	3.3E-8	1.23E-5
GSE13547_CTRL_VS_ANTI_IGM_STIM_BCELL_12H_UP	182	Genes up-regulated in B lymphocytes: control versus stimulated by anti-IgM for 12h.	9	0.0495	3.31E-8	1.23E-5
WU_CELL_MIGRATION	184	Genes associated with migration rate of 40 human bladder cancer cells.	9	0.0489	3.64E-8	1.32E-5
GO_REGULATION_OF_CELL_DEATH	1472	Any process that modulates the rate or frequency of cell death. Cell death is the specific activation or halting of processes within a cell so that its vital functions markedly cease, rather than simply deteriorating gradually over time, which culminates in cell death.	22	0.0149	3.87E-8	1.38E-5
GO_CHROMOSOME	880	A structure composed of a very long molecule of DNA and associated proteins (e.g. histones) that carries hereditary information.	17	0.0193	4.24E-8	1.48E-5
KOBAYASHI_EGFR_SIGNALING_24HR_DN	251	Genes down-regulated in H1975 cells (non-small cell lung cancer, NSCLC) resistant to gefitinib [PubChem=123631] after treatment with EGFR inhibitor CL-387785 [PubChem=2776] for 24h.	10	0.0398	4.35E-8	1.49E-5
PUJANA_CHEK2_PCC_NETWORK	779	Genes constituting the CHEK2-PCC network of transcripts whose expression positively correlates (Pearson correlation coefficient, PCC >= 0.4) with that of CHEK2 [GeneID=11200].	16	0.0205	4.7E-8	1.58E-5
BLALOCK_ALZHEIMERS_DISEASE_DN	1237	Genes down-regulated in brain from patients with Alzheimer's disease.	20	0.0162	4.78E-8	1.58E-5
TTGTTT_FOXO4_01	2061	Genes having at least one occurence of the highly conserved motif M60 TTGTTT sites. The motif matches transcription factor binding site V$FOXO4_01 (v7.4 TRANSFAC).	26	0.0126	6.01E-8	1.92E-5
E2F3_UP.V1_UP	196	Genes up-regulated in primary epithelial breast cancer cell culture over-expressing E2F3 [Gene ID=1871] gene.	9	0.0459	6.26E-8	1.92E-5
GSE45365_WT_VS_IFNAR_KO_BCELL_MCMV_INFECTION_DN	196	Genes down-regulated in CD8 T cells: control versus primary acute viral infection.	9	0.0459	6.26E-8	1.92E-5
ROSTY_CERVICAL_CANCER_PROLIFERATION_CLUSTER	140	The 'Cervical Cancer Proliferation Cluster' (CCPC): genes whose expression in cervical carcinoma positively correlates with that of the HPV E6 and E7 oncogenes; they are also differentially expressed according to disease outcome.	8	0.0571	6.41E-8	1.92E-5
GSE21678_WT_VS_FOXO1_FOXO3_KO_TREG_UP	199	Genes up-regulated in T reg cells: wildtype versus FOXO1 and FOXO3 [GeneID=2308;2309].	9	0.0452	7.13E-8	1.92E-5
GSE13738_RESTING_VS_BYSTANDER_ACTIVATED_CD4_TCELL_DN	200	Genes down-regulated in comparison of resting CD4 [GeneID=920] T cells versus bystander activated CD4 [GeneID=920] T cells.	9	0.0450	7.44E-8	1.92E-5
GSE15750_DAY6_VS_DAY10_EFF_CD8_TCELL_UP	200	Genes up-regulated in comparison of wild type CD8 effector T cells at day 6 versus those at day 10.	9	0.0450	7.44E-8	1.92E-5
GSE17721_CPG_VS_GARDIQUIMOD_12H_BMDC_DN	200	Genes down-regulated in comparison of dendritic cells (DC) stimulated with CpG DNA (TLR9 agonist) at 12 h versus DC cells stimulated with Gardiquimod (TLR7 agonist) at 12 h.	9	0.0450	7.44E-8	1.92E-5
GSE20754_WT_VS_TCF1_KO_MEMORY_CD8_TCELL_DN	200	Genes down-regulated in memory CD8 T cells: wildtype versus TCF7 [GeneID=6932] knockout.	9	0.0450	7.44E-8	1.92E-5
GSE25085_FETAL_LIVER_VS_ADULT_BM_SP4_THYMIC_IMPLANT_DN	200	Genes down-regulated in thymic implants from fetal liver versus those from adult bone marrow.	9	0.0450	7.44E-8	1.92E-5
GSE28408_LY6G_POS_VS_NEG_DC_DN	200	Genes down-regulated dendritic cells: Ly6G+ versus Ly6G-.	9	0.0450	7.44E-8	1.92E-5
GSE36476_CTRL_VS_TSST_ACT_72H_MEMORY_CD4_TCELL_YOUNG_DN	200	Genes down-regulated in comparison of untreated CD4 [GeneID=920] memory T cells from young donors versus those treated with TSST at 72 h.	9	0.0450	7.44E-8	1.92E-5
GSE36826_NORMAL_VS_STAPH_AUREUS_INF_IL1R_KO_SKIN_UP	200	Genes up-regulated in skin with IL1R1 [GeneID=3554] knockout: uninfected versus S. aureus infection.	9	0.0450	7.44E-8	1.92E-5
GSE41176_UNSTIM_VS_ANTI_IGM_STIM_BCELL_6H_UP	200	Genes up-regulated in B lymphocytes: untreated versus anti-IgM for 6h.	9	0.0450	7.44E-8	1.92E-5
ENK_UV_RESPONSE_EPIDERMIS_DN	508	Genes down-regulated in epidermis after to UVB irradiation.	13	0.0256	7.46E-8	1.92E-5
GO_REGULATION_OF_DNA_METABOLIC_PROCESS	340	Any process that modulates the frequency, rate or extent of the chemical reactions and pathways involving DNA.	11	0.0324	7.56E-8	1.92E-5
CORDENONSI_YAP_CONSERVED_SIGNATURE	57	YAP conserved signature.	6	0.1053	7.8E-8	1.96E-5
GO_ATPASE_ACTIVITY	427	Catalysis of the reaction: ATP + H2O = ADP + phosphate + 2 H+. May or may not be coupled to another reaction.	12	0.0281	8.81E-8	2.18E-5
CHANG_CYCLING_GENES	148	Fibroblast serum response genes showing periodic expression during the cell cycle; excluded from the core serum response signature.	8	0.0541	9.86E-8	2.41E-5
GO_CYTOSKELETAL_PART	1436	Any constituent part of the cytoskeleton, a cellular scaffolding or skeleton that maintains cell shape, enables some cell motion (using structures such as flagella and cilia), and plays important roles in both intra-cellular transport (e.g. the movement of vesicles and organelles) and cellular division. Includes constituent parts of intermediate filaments, microfilaments, microtubules, and the mi…	21	0.0146	1.16E-7	2.79E-5
GO_SEXUAL_REPRODUCTION	730	A reproduction process that creates a new organism by combining the genetic material of two organisms. It occurs both in eukaryotes and prokaryotes: in multicellular eukaryotic organisms, an individual is created anew; in prokaryotes, the initial cell has additional or transformed genetic material. In a process called genetic recombination, genetic material (DNA) originating from two different in…	15	0.0205	1.25E-7	2.97E-5
GO_CELL_CYCLE	1316	The progression of biochemical and morphological phases and events that occur in a cell during successive cell replication or nuclear replication events. Canonically, the cell cycle comprises the replication and segregation of genetic material followed by the division of the cell, but in endocycles or syncytial cells nuclear replication or nuclear division may not be followed by cell division.	20	0.0152	1.29E-7	3.03E-5
TGCACTT_MIR519C_MIR519B_MIR519A	448	Genes having at least one occurence of the motif TGCACTT in their 3' untranslated region. The motif represents putative target (that is, seed match) of human mature miRNAs hsa-miR-519c, hsa-miR-519b and hsa-miR-519a (v7.1 miRBase).	12	0.0268	1.48E-7	3.41E-5
STK33_SKM_DN	288	Genes down-regulated in SKM-1 cells (AML) after knockdown of STK33 [Gene ID=65975] by RNAi.	10	0.0347	1.57E-7	3.58E-5
CHEN_METABOLIC_SYNDROM_NETWORK	1210	Genes forming the macrophage-enriched metabolic network (MEMN) claimed to have a causal relationship with the metabolic syndrom traits.	19	0.0157	1.66E-7	3.74E-5
PATIL_LIVER_CANCER	747	Genes up-regulated in hepatocellular carcinoma (HCC) compared to normal liver samples.	15	0.0201	1.68E-7	3.74E-5
GSE27241_WT_VS_RORGT_KO_TH17_POLARIZED_CD4_TCELL_UP	161	Genes up-regulated in polarizing CD4 [GeneID=920] Th17 cells: wildtype versus RORC [GeneID=6097] knockout.	8	0.0497	1.89E-7	4.15E-5
GO_REGULATION_OF_SIGNAL_TRANSDUCTION_BY_P53_CLASS_MEDIATOR	162	Any process that modulates the frequency, rate or extent of signal transduction by p53 class mediator.	8	0.0494	1.98E-7	4.3E-5
BENPORATH_ES_1	379	Set 'ES exp1': genes overexpressed in human embryonic stem cells according to 5 or more out of 20 profiling studies.	11	0.0290	2.24E-7	4.81E-5
GO_DOUBLE_STRAND_BREAK_REPAIR	165	The repair of double-strand breaks in DNA via homologous and nonhomologous mechanisms to reform a continuous DNA helix.	8	0.0485	2.28E-7	4.83E-5
GO_MITOCHONDRION	1633	A semiautonomous, self replicating organelle that occurs in varying numbers, shapes, and sizes in the cytoplasm of virtually all eukaryotic cells. It is notably the site of tissue respiration.	22	0.0135	2.31E-7	4.83E-5
CASORELLI_ACUTE_PROMYELOCYTIC_LEUKEMIA_DN	663	Genes down-regulated in APL (acute promyeolocytic leukemia) blasts expressing PML-RARA fusion [GeneID=5371;5914] compared to normal promyeloblasts.	14	0.0211	2.41E-7	5E-5
UEDA_PERIFERAL_CLOCK	169	Molecular timetable composed of 162 time-indicating genes (182 probes) in the peripheral (liver) clock.	8	0.0473	2.73E-7	5.6E-5
DIAZ_CHRONIC_MEYLOGENOUS_LEUKEMIA_UP	1382	Genes up-regulated in CD34+ [GeneID=947] cells isolated from bone marrow of CML (chronic myelogenous leukemia) patients, compared to those from normal donors.	20	0.0145	2.8E-7	5.67E-5
GO_REGULATION_OF_INTRACELLULAR_SIGNAL_TRANSDUCTION	1656	Any process that modulates the frequency, rate or extent of intracellular signal transduction.	22	0.0133	2.92E-7	5.84E-5
HORIUCHI_WTAP_TARGETS_DN	310	Genes down-regulated in primary endothelial cells (HUVEC) after knockdown of WTAP [GeneID=9589] by RNAi.	10	0.0323	3.08E-7	6.09E-5
MODULE_252	237	TFs and nuclear.	9	0.0380	3.14E-7	6.09E-5
NFE2L2.V2	481	Genes up-regulated in MEF cells (embryonic fibroblasts) with knockout of NFE2L2 [Gene ID=4780] gene.	12	0.0249	3.15E-7	6.09E-5
MODULE_98	393	Genes in the cancer module 98.	11	0.0280	3.21E-7	6.14E-5
GO_STRUCTURE_SPECIFIC_DNA_BINDING	118	Interacting selectively and non-covalently with DNA of a specific structure or configuration e.g. triplex DNA binding or bent DNA binding.	7	0.0593	3.38E-7	6.33E-5
ANDERSEN_CHOLANGIOCARCINOMA_CLASS2	174	Genes overexpressed in cholangiocarcinoma class 2 associated with poor prognosis.	8	0.0460	3.41E-7	6.33E-5
VILLANUEVA_LIVER_CANCER_KRT19_UP	174	Genes over-expressed in KRT19-positive [GeneID=3880] hepatocellular carcinoma (HCC).	8	0.0460	3.41E-7	6.33E-5
GO_RESPONSE_TO_ABIOTIC_STIMULUS	1024	Any process that results in a change in state or activity of a cell or an organism (in terms of movement, secretion, enzyme production, gene expression, etc.) as a result of an abiotic (non-living) stimulus.	17	0.0166	3.58E-7	6.58E-5
HAMAI_APOPTOSIS_VIA_TRAIL_UP	584	Genes up-regulated in T1 cells (primary melanoma, sensitive to TRAIL [GeneID=8743]) compared to G1 cells (metastatic melanoma, resistant to TRAIL).	13	0.0223	3.65E-7	6.63E-5
GO_CYTOSKELETON	1967	Any of the various filamentous elements that form the internal framework of cells, and typically remain after treatment of the cells with mild detergent to remove membrane constituents and soluble components of the cytoplasm. The term embraces intermediate filaments, microfilaments, microtubules, the microtrabecular lattice, and other structures characterized by a polymeric filamentous nature and…	24	0.0122	3.74E-7	6.72E-5
CTTTGT_LEF1_Q2	1972	Genes having at least one occurence of the highly conserved motif M13 CTTTGT sites. The motif matches transcription factor binding site V$LEF1_Q2 (v7.4 TRANSFAC).	24	0.0122	3.91E-7	6.97E-5
Gene/Gene Set Overlap Matrix
Entrez Gene Id	Gene Symbol	Gene Description	TIEN_INTESTINE_PROBIOTICS_24HR_UP	BENPORATH_CYCLING_GENES	NUYTTEN_EZH2_TARGETS_DN	FISCHER_DREAM_TARGETS	GEORGES_TARGETS_OF_MIR192_AND_MIR215	GOBERT_OLIGODENDROCYTE_DIFFERENTIATION_UP	GO_ENZYME_BINDING	NUYTTEN_NIPP1_TARGETS_DN	PUJANA_BRCA1_PCC_NETWORK	GO_REGULATION_OF_CELLULAR_RESPONSE_TO_STRESS	PUJANA_ATM_PCC_NETWORK	GSE21670_UNTREATED_VS_TGFB_IL6_TREATED_CD4_TCELL_UP	GO_REGULATION_OF_RESPONSE_TO_STRESS	GO_CELLULAR_RESPONSE_TO_DNA_DAMAGE_STIMULUS	DUTERTRE_ESTRADIOL_RESPONSE_24HR_UP	MARSON_BOUND_BY_E2F4_UNSTIMULATED	BRUINS_UVC_RESPONSE_LATE	MODULE_54	GO_MULTICELLULAR_ORGANISM_REPRODUCTION	FISCHER_G2_M_CELL_CYCLE	GO_CELLULAR_RESPONSE_TO_STRESS	DODD_NASOPHARYNGEAL_CARCINOMA_DN	GO_CATALYTIC_COMPLEX	KINSEY_TARGETS_OF_EWSR1_FLII_FUSION_UP	GO_REPRODUCTION	GO_REGULATION_OF_RESPONSE_TO_DNA_DAMAGE_STIMULUS	GO_DNA_METABOLIC_PROCESS	GOLDRATH_EFF_VS_MEMORY_CD8_TCELL_UP	GO_MALE_GAMETE_GENERATION	SCHAEFFER_PROSTATE_DEVELOPMENT_48HR_UP	FUJII_YBX1_TARGETS_DN	LU_EZH2_TARGETS_DN	GO_BASE_EXCISION_REPAIR	LEE_EARLY_T_LYMPHOCYTE_UP	GO_MULTI_ORGANISM_REPRODUCTIVE_PROCESS	GO_GAMETE_GENERATION	GO_CHROMOSOME_ORGANIZATION	GO_DNA_RECOMBINATION	WHITFIELD_CELL_CYCLE_S	NUYTTEN_EZH2_TARGETS_UP	GO_ESTABLISHMENT_OF_LOCALIZATION_IN_CELL	GSE4984_UNTREATED_VS_VEHICLE_CTRL_TREATED_DC_DN	GO_HYDROLASE_ACTIVITY_ACTING_ON_ESTER_BONDS	GO_MICROTUBULE_CYTOSKELETON	PILON_KLF1_TARGETS_DN	ZHOU_CELL_CYCLE_GENES_IN_IR_RESPONSE_24HR	GO_ENVELOPE
993	CDC25A	cell division cycle 25 homolog A (S. pombe)	TIEN_INTESTINE_PROBIOTICS_24HR_UP	BENPORATH_CYCLING_GENES	NUYTTEN_EZH2_TARGETS_DN	FISCHER_DREAM_TARGETS	GEORGES_TARGETS_OF_MIR192_AND_MIR215		GO_ENZYME_BINDING		PUJANA_BRCA1_PCC_NETWORK			GSE21670_UNTREATED_VS_TGFB_IL6_TREATED_CD4_TCELL_UP				MARSON_BOUND_BY_E2F4_UNSTIMULATED						DODD_NASOPHARYNGEAL_CARCINOMA_DN		KINSEY_TARGETS_OF_EWSR1_FLII_FUSION_UP			GO_DNA_METABOLIC_PROCESS				FUJII_YBX1_TARGETS_DN			LEE_EARLY_T_LYMPHOCYTE_UP									GO_HYDROLASE_ACTIVITY_ACTING_ON_ESTER_BONDS		PILON_KLF1_TARGETS_DN
10635	RAD51AP1	RAD51 associated protein 1	TIEN_INTESTINE_PROBIOTICS_24HR_UP	BENPORATH_CYCLING_GENES	NUYTTEN_EZH2_TARGETS_DN	FISCHER_DREAM_TARGETS		GOBERT_OLIGODENDROCYTE_DIFFERENTIATION_UP			PUJANA_BRCA1_PCC_NETWORK	GO_REGULATION_OF_CELLULAR_RESPONSE_TO_STRESS	PUJANA_ATM_PCC_NETWORK		GO_REGULATION_OF_RESPONSE_TO_STRESS	GO_CELLULAR_RESPONSE_TO_DNA_DAMAGE_STIMULUS		MARSON_BOUND_BY_E2F4_UNSTIMULATED					GO_CELLULAR_RESPONSE_TO_STRESS	DODD_NASOPHARYNGEAL_CARCINOMA_DN		KINSEY_TARGETS_OF_EWSR1_FLII_FUSION_UP		GO_REGULATION_OF_RESPONSE_TO_DNA_DAMAGE_STIMULUS	GO_DNA_METABOLIC_PROCESS	GOLDRATH_EFF_VS_MEMORY_CD8_TCELL_UP						LEE_EARLY_T_LYMPHOCYTE_UP				GO_DNA_RECOMBINATION	WHITFIELD_CELL_CYCLE_S						PILON_KLF1_TARGETS_DN
7247	TSN	translin	TIEN_INTESTINE_PROBIOTICS_24HR_UP	BENPORATH_CYCLING_GENES	NUYTTEN_EZH2_TARGETS_DN															MODULE_54		FISCHER_G2_M_CELL_CYCLE				KINSEY_TARGETS_OF_EWSR1_FLII_FUSION_UP			GO_DNA_METABOLIC_PROCESS											GO_DNA_RECOMBINATION					GO_HYDROLASE_ACTIVITY_ACTING_ON_ESTER_BONDS
7374	UNG	uracil-DNA glycosylase	TIEN_INTESTINE_PROBIOTICS_24HR_UP	BENPORATH_CYCLING_GENES		FISCHER_DREAM_TARGETS	GEORGES_TARGETS_OF_MIR192_AND_MIR215	GOBERT_OLIGODENDROCYTE_DIFFERENTIATION_UP	GO_ENZYME_BINDING		PUJANA_BRCA1_PCC_NETWORK		PUJANA_ATM_PCC_NETWORK			GO_CELLULAR_RESPONSE_TO_DNA_DAMAGE_STIMULUS	DUTERTRE_ESTRADIOL_RESPONSE_24HR_UP	MARSON_BOUND_BY_E2F4_UNSTIMULATED		MODULE_54			GO_CELLULAR_RESPONSE_TO_STRESS	DODD_NASOPHARYNGEAL_CARCINOMA_DN					GO_DNA_METABOLIC_PROCESS				FUJII_YBX1_TARGETS_DN		GO_BASE_EXCISION_REPAIR					GO_DNA_RECOMBINATION
8655	DYNLL1	dynein, light chain, LC8-type 1	TIEN_INTESTINE_PROBIOTICS_24HR_UP	BENPORATH_CYCLING_GENES				GOBERT_OLIGODENDROCYTE_DIFFERENTIATION_UP													GO_MULTICELLULAR_ORGANISM_REPRODUCTION				GO_CATALYTIC_COMPLEX		GO_REPRODUCTION										GO_MULTI_ORGANISM_REPRODUCTIVE_PROCESS	GO_GAMETE_GENERATION					GO_ESTABLISHMENT_OF_LOCALIZATION_IN_CELL			GO_MICROTUBULE_CYTOSKELETON
3156	HMGCR	3-hydroxy-3-methylglutaryl-CoA reductase	TIEN_INTESTINE_PROBIOTICS_24HR_UP	BENPORATH_CYCLING_GENES					GO_ENZYME_BINDING	NUYTTEN_NIPP1_TARGETS_DN	PUJANA_BRCA1_PCC_NETWORK	GO_REGULATION_OF_CELLULAR_RESPONSE_TO_STRESS			GO_REGULATION_OF_RESPONSE_TO_STRESS							FISCHER_G2_M_CELL_CYCLE												LU_EZH2_TARGETS_DN										GSE4984_UNTREATED_VS_VEHICLE_CTRL_TREATED_DC_DN
6446	SGK1	serum/glucocorticoid regulated kinase 1	TIEN_INTESTINE_PROBIOTICS_24HR_UP	BENPORATH_CYCLING_GENES					GO_ENZYME_BINDING							GO_CELLULAR_RESPONSE_TO_DNA_DAMAGE_STIMULUS							GO_CELLULAR_RESPONSE_TO_STRESS									SCHAEFFER_PROSTATE_DEVELOPMENT_48HR_UP										NUYTTEN_EZH2_TARGETS_UP
3613	IMPA2	inositol(myo)-1(or 4)-monophosphatase 2	TIEN_INTESTINE_PROBIOTICS_24HR_UP		NUYTTEN_EZH2_TARGETS_DN			GOBERT_OLIGODENDROCYTE_DIFFERENTIATION_UP		NUYTTEN_NIPP1_TARGETS_DN				GSE21670_UNTREATED_VS_TGFB_IL6_TREATED_CD4_TCELL_UP			DUTERTRE_ESTRADIOL_RESPONSE_24HR_UP		BRUINS_UVC_RESPONSE_LATE	MODULE_54						KINSEY_TARGETS_OF_EWSR1_FLII_FUSION_UP																			GO_HYDROLASE_ACTIVITY_ACTING_ON_ESTER_BONDS		PILON_KLF1_TARGETS_DN
79902	NUP85	nucleoporin 85kDa	TIEN_INTESTINE_PROBIOTICS_24HR_UP			FISCHER_DREAM_TARGETS		GOBERT_OLIGODENDROCYTE_DIFFERENTIATION_UP				GO_REGULATION_OF_CELLULAR_RESPONSE_TO_STRESS			GO_REGULATION_OF_RESPONSE_TO_STRESS		DUTERTRE_ESTRADIOL_RESPONSE_24HR_UP	MARSON_BOUND_BY_E2F4_UNSTIMULATED						DODD_NASOPHARYNGEAL_CARCINOMA_DN		KINSEY_TARGETS_OF_EWSR1_FLII_FUSION_UP													GO_CHROMOSOME_ORGANIZATION				GO_ESTABLISHMENT_OF_LOCALIZATION_IN_CELL			GO_MICROTUBULE_CYTOSKELETON			GO_ENVELOPE
84901	NFATC2IP	nuclear factor of activated T-cells, cytoplasmic, calcineurin-dependent 2 interacting protein	TIEN_INTESTINE_PROBIOTICS_24HR_UP			FISCHER_DREAM_TARGETS					PUJANA_BRCA1_PCC_NETWORK		PUJANA_ATM_PCC_NETWORK					MARSON_BOUND_BY_E2F4_UNSTIMULATED
23052	ENDOD1	endonuclease domain containing 1	TIEN_INTESTINE_PROBIOTICS_24HR_UP				GEORGES_TARGETS_OF_MIR192_AND_MIR215												BRUINS_UVC_RESPONSE_LATE													SCHAEFFER_PROSTATE_DEVELOPMENT_48HR_UP										NUYTTEN_EZH2_TARGETS_UP		GSE4984_UNTREATED_VS_VEHICLE_CTRL_TREATED_DC_DN	GO_HYDROLASE_ACTIVITY_ACTING_ON_ESTER_BONDS
201562	PTPLB	protein tyrosine phosphatase-like (proline instead of catalytic arginine), member b	TIEN_INTESTINE_PROBIOTICS_24HR_UP						GO_ENZYME_BINDING																																				GO_HYDROLASE_ACTIVITY_ACTING_ON_ESTER_BONDS
4637	MYL6	myosin, light chain 6, alkali, smooth muscle and non-muscle	TIEN_INTESTINE_PROBIOTICS_24HR_UP							NUYTTEN_NIPP1_TARGETS_DN									BRUINS_UVC_RESPONSE_LATE
51181	DCXR	dicarbonyl/L-xylulose reductase	TIEN_INTESTINE_PROBIOTICS_24HR_UP							NUYTTEN_NIPP1_TARGETS_DN																						SCHAEFFER_PROSTATE_DEVELOPMENT_48HR_UP														GO_MICROTUBULE_CYTOSKELETON
1660	DHX9	DEAH (Asp-Glu-Ala-His) box polypeptide 9	TIEN_INTESTINE_PROBIOTICS_24HR_UP								PUJANA_BRCA1_PCC_NETWORK		PUJANA_ATM_PCC_NETWORK																										GO_CHROMOSOME_ORGANIZATION							GO_MICROTUBULE_CYTOSKELETON
9556	C14orf2	chromosome 14 open reading frame 2	TIEN_INTESTINE_PROBIOTICS_24HR_UP								PUJANA_BRCA1_PCC_NETWORK		PUJANA_ATM_PCC_NETWORK																																				GO_ENVELOPE
55366	LGR4	leucine-rich repeat containing G protein-coupled receptor 4	TIEN_INTESTINE_PROBIOTICS_24HR_UP												GO_REGULATION_OF_RESPONSE_TO_STRESS						GO_MULTICELLULAR_ORGANISM_REPRODUCTION						GO_REPRODUCTION				GO_MALE_GAMETE_GENERATION						GO_MULTI_ORGANISM_REPRODUCTIVE_PROCESS	GO_GAMETE_GENERATION
10553	HTATIP2	HIV-1 Tat interactive protein 2, 30kDa	TIEN_INTESTINE_PROBIOTICS_24HR_UP																BRUINS_UVC_RESPONSE_LATE																								GO_ESTABLISHMENT_OF_LOCALIZATION_IN_CELL						GO_ENVELOPE
4695	NDUFA2	NADH dehydrogenase (ubiquinone) 1 alpha subcomplex, 2, 8kDa	TIEN_INTESTINE_PROBIOTICS_24HR_UP																						GO_CATALYTIC_COMPLEX																								GO_ENVELOPE
2731	GLDC	glycine dehydrogenase (decarboxylating)	TIEN_INTESTINE_PROBIOTICS_24HR_UP																						GO_CATALYTIC_COMPLEX
51693	TRAPPC2L	trafficking protein particle complex 2-like	TIEN_INTESTINE_PROBIOTICS_24HR_UP																																								GO_ESTABLISHMENT_OF_LOCALIZATION_IN_CELL
427	ASAH1	N-acylsphingosine amidohydrolase (acid ceramidase) 1	TIEN_INTESTINE_PROBIOTICS_24HR_UP																																												PILON_KLF1_TARGETS_DN
79888	LPCAT1	lysophosphatidylcholine acyltransferase 1	TIEN_INTESTINE_PROBIOTICS_24HR_UP																																												PILON_KLF1_TARGETS_DN
4258	MGST2	microsomal glutathione S-transferase 2	TIEN_INTESTINE_PROBIOTICS_24HR_UP																																														GO_ENVELOPE
4001	LMNB1	lamin B1		BENPORATH_CYCLING_GENES	NUYTTEN_EZH2_TARGETS_DN	FISCHER_DREAM_TARGETS	GEORGES_TARGETS_OF_MIR192_AND_MIR215	GOBERT_OLIGODENDROCYTE_DIFFERENTIATION_UP	GO_ENZYME_BINDING	NUYTTEN_NIPP1_TARGETS_DN	PUJANA_BRCA1_PCC_NETWORK		PUJANA_ATM_PCC_NETWORK				DUTERTRE_ESTRADIOL_RESPONSE_24HR_UP		BRUINS_UVC_RESPONSE_LATE	MODULE_54				DODD_NASOPHARYNGEAL_CARCINOMA_DN		KINSEY_TARGETS_OF_EWSR1_FLII_FUSION_UP				GOLDRATH_EFF_VS_MEMORY_CD8_TCELL_UP			FUJII_YBX1_TARGETS_DN														PILON_KLF1_TARGETS_DN	ZHOU_CELL_CYCLE_GENES_IN_IR_RESPONSE_24HR	GO_ENVELOPE
81610	FAM83D	family with sequence similarity 83, member D		BENPORATH_CYCLING_GENES	NUYTTEN_EZH2_TARGETS_DN	FISCHER_DREAM_TARGETS	GEORGES_TARGETS_OF_MIR192_AND_MIR215	GOBERT_OLIGODENDROCYTE_DIFFERENTIATION_UP	GO_ENZYME_BINDING					GSE21670_UNTREATED_VS_TGFB_IL6_TREATED_CD4_TCELL_UP			DUTERTRE_ESTRADIOL_RESPONSE_24HR_UP		BRUINS_UVC_RESPONSE_LATE	MODULE_54		FISCHER_G2_M_CELL_CYCLE				KINSEY_TARGETS_OF_EWSR1_FLII_FUSION_UP								LU_EZH2_TARGETS_DN									GO_ESTABLISHMENT_OF_LOCALIZATION_IN_CELL			GO_MICROTUBULE_CYTOSKELETON
29028	ATAD2	ATPase family, AAA domain containing 2		BENPORATH_CYCLING_GENES	NUYTTEN_EZH2_TARGETS_DN	FISCHER_DREAM_TARGETS	GEORGES_TARGETS_OF_MIR192_AND_MIR215	GOBERT_OLIGODENDROCYTE_DIFFERENTIATION_UP						GSE21670_UNTREATED_VS_TGFB_IL6_TREATED_CD4_TCELL_UP			DUTERTRE_ESTRADIOL_RESPONSE_24HR_UP			MODULE_54				DODD_NASOPHARYNGEAL_CARCINOMA_DN		KINSEY_TARGETS_OF_EWSR1_FLII_FUSION_UP							FUJII_YBX1_TARGETS_DN			LEE_EARLY_T_LYMPHOCYTE_UP			GO_CHROMOSOME_ORGANIZATION		WHITFIELD_CELL_CYCLE_S
55165	CEP55	centrosomal protein 55kDa		BENPORATH_CYCLING_GENES	NUYTTEN_EZH2_TARGETS_DN	FISCHER_DREAM_TARGETS	GEORGES_TARGETS_OF_MIR192_AND_MIR215	GOBERT_OLIGODENDROCYTE_DIFFERENTIATION_UP									DUTERTRE_ESTRADIOL_RESPONSE_24HR_UP	MARSON_BOUND_BY_E2F4_UNSTIMULATED		MODULE_54		FISCHER_G2_M_CELL_CYCLE		DODD_NASOPHARYNGEAL_CARCINOMA_DN		KINSEY_TARGETS_OF_EWSR1_FLII_FUSION_UP										LEE_EARLY_T_LYMPHOCYTE_UP			GO_CHROMOSOME_ORGANIZATION				GO_ESTABLISHMENT_OF_LOCALIZATION_IN_CELL			GO_MICROTUBULE_CYTOSKELETON	PILON_KLF1_TARGETS_DN	ZHOU_CELL_CYCLE_GENES_IN_IR_RESPONSE_24HR
55247	NEIL3	nei endonuclease VIII-like 3 (E. coli)		BENPORATH_CYCLING_GENES	NUYTTEN_EZH2_TARGETS_DN	FISCHER_DREAM_TARGETS	GEORGES_TARGETS_OF_MIR192_AND_MIR215							GSE21670_UNTREATED_VS_TGFB_IL6_TREATED_CD4_TCELL_UP		GO_CELLULAR_RESPONSE_TO_DNA_DAMAGE_STIMULUS		MARSON_BOUND_BY_E2F4_UNSTIMULATED		MODULE_54		FISCHER_G2_M_CELL_CYCLE	GO_CELLULAR_RESPONSE_TO_STRESS	DODD_NASOPHARYNGEAL_CARCINOMA_DN		KINSEY_TARGETS_OF_EWSR1_FLII_FUSION_UP			GO_DNA_METABOLIC_PROCESS				FUJII_YBX1_TARGETS_DN		GO_BASE_EXCISION_REPAIR	LEE_EARLY_T_LYMPHOCYTE_UP									GO_HYDROLASE_ACTIVITY_ACTING_ON_ESTER_BONDS			ZHOU_CELL_CYCLE_GENES_IN_IR_RESPONSE_24HR
3014	H2AFX	H2A histone family, member X		BENPORATH_CYCLING_GENES	NUYTTEN_EZH2_TARGETS_DN	FISCHER_DREAM_TARGETS		GOBERT_OLIGODENDROCYTE_DIFFERENTIATION_UP	GO_ENZYME_BINDING	NUYTTEN_NIPP1_TARGETS_DN	PUJANA_BRCA1_PCC_NETWORK	GO_REGULATION_OF_CELLULAR_RESPONSE_TO_STRESS		GSE21670_UNTREATED_VS_TGFB_IL6_TREATED_CD4_TCELL_UP	GO_REGULATION_OF_RESPONSE_TO_STRESS	GO_CELLULAR_RESPONSE_TO_DNA_DAMAGE_STIMULUS	DUTERTRE_ESTRADIOL_RESPONSE_24HR_UP	MARSON_BOUND_BY_E2F4_UNSTIMULATED	BRUINS_UVC_RESPONSE_LATE	MODULE_54	GO_MULTICELLULAR_ORGANISM_REPRODUCTION	FISCHER_G2_M_CELL_CYCLE	GO_CELLULAR_RESPONSE_TO_STRESS				GO_REPRODUCTION	GO_REGULATION_OF_RESPONSE_TO_DNA_DAMAGE_STIMULUS	GO_DNA_METABOLIC_PROCESS	GOLDRATH_EFF_VS_MEMORY_CD8_TCELL_UP	GO_MALE_GAMETE_GENERATION		FUJII_YBX1_TARGETS_DN				GO_MULTI_ORGANISM_REPRODUCTIVE_PROCESS	GO_GAMETE_GENERATION	GO_CHROMOSOME_ORGANIZATION	GO_DNA_RECOMBINATION								ZHOU_CELL_CYCLE_GENES_IN_IR_RESPONSE_24HR
1763	DNA2	DNA replication helicase 2 homolog (yeast)		BENPORATH_CYCLING_GENES	NUYTTEN_EZH2_TARGETS_DN	FISCHER_DREAM_TARGETS		GOBERT_OLIGODENDROCYTE_DIFFERENTIATION_UP			PUJANA_BRCA1_PCC_NETWORK		PUJANA_ATM_PCC_NETWORK			GO_CELLULAR_RESPONSE_TO_DNA_DAMAGE_STIMULUS	DUTERTRE_ESTRADIOL_RESPONSE_24HR_UP						GO_CELLULAR_RESPONSE_TO_STRESS	DODD_NASOPHARYNGEAL_CARCINOMA_DN	GO_CATALYTIC_COMPLEX	KINSEY_TARGETS_OF_EWSR1_FLII_FUSION_UP			GO_DNA_METABOLIC_PROCESS	GOLDRATH_EFF_VS_MEMORY_CD8_TCELL_UP					GO_BASE_EXCISION_REPAIR				GO_CHROMOSOME_ORGANIZATION	GO_DNA_RECOMBINATION	WHITFIELD_CELL_CYCLE_S				GO_HYDROLASE_ACTIVITY_ACTING_ON_ESTER_BONDS		PILON_KLF1_TARGETS_DN
3149	HMGB3	high mobility group box 3		BENPORATH_CYCLING_GENES	NUYTTEN_EZH2_TARGETS_DN	FISCHER_DREAM_TARGETS		GOBERT_OLIGODENDROCYTE_DIFFERENTIATION_UP			PUJANA_BRCA1_PCC_NETWORK			GSE21670_UNTREATED_VS_TGFB_IL6_TREATED_CD4_TCELL_UP				MARSON_BOUND_BY_E2F4_UNSTIMULATED				FISCHER_G2_M_CELL_CYCLE				KINSEY_TARGETS_OF_EWSR1_FLII_FUSION_UP			GO_DNA_METABOLIC_PROCESS	GOLDRATH_EFF_VS_MEMORY_CD8_TCELL_UP			FUJII_YBX1_TARGETS_DN			LEE_EARLY_T_LYMPHOCYTE_UP			GO_CHROMOSOME_ORGANIZATION	GO_DNA_RECOMBINATION								ZHOU_CELL_CYCLE_GENES_IN_IR_RESPONSE_24HR
5635	PRPSAP1	phosphoribosyl pyrophosphate synthetase-associated protein 1		BENPORATH_CYCLING_GENES	NUYTTEN_EZH2_TARGETS_DN				GO_ENZYME_BINDING	NUYTTEN_NIPP1_TARGETS_DN															GO_CATALYTIC_COMPLEX																						PILON_KLF1_TARGETS_DN
54491	FAM105A	family with sequence similarity 105, member A		BENPORATH_CYCLING_GENES	NUYTTEN_EZH2_TARGETS_DN					NUYTTEN_NIPP1_TARGETS_DN																						SCHAEFFER_PROSTATE_DEVELOPMENT_48HR_UP															PILON_KLF1_TARGETS_DN
10207	INADL	InaD-like (Drosophila)		BENPORATH_CYCLING_GENES	NUYTTEN_EZH2_TARGETS_DN
10721	POLQ	polymerase (DNA directed), theta		BENPORATH_CYCLING_GENES		FISCHER_DREAM_TARGETS	GEORGES_TARGETS_OF_MIR192_AND_MIR215					GO_REGULATION_OF_CELLULAR_RESPONSE_TO_STRESS		GSE21670_UNTREATED_VS_TGFB_IL6_TREATED_CD4_TCELL_UP	GO_REGULATION_OF_RESPONSE_TO_STRESS	GO_CELLULAR_RESPONSE_TO_DNA_DAMAGE_STIMULUS	DUTERTRE_ESTRADIOL_RESPONSE_24HR_UP	MARSON_BOUND_BY_E2F4_UNSTIMULATED		MODULE_54		FISCHER_G2_M_CELL_CYCLE	GO_CELLULAR_RESPONSE_TO_STRESS	DODD_NASOPHARYNGEAL_CARCINOMA_DN		KINSEY_TARGETS_OF_EWSR1_FLII_FUSION_UP		GO_REGULATION_OF_RESPONSE_TO_DNA_DAMAGE_STIMULUS	GO_DNA_METABOLIC_PROCESS					LU_EZH2_TARGETS_DN	GO_BASE_EXCISION_REPAIR					GO_DNA_RECOMBINATION
6118	RPA2	replication protein A2, 32kDa		BENPORATH_CYCLING_GENES		FISCHER_DREAM_TARGETS		GOBERT_OLIGODENDROCYTE_DIFFERENTIATION_UP	GO_ENZYME_BINDING		PUJANA_BRCA1_PCC_NETWORK	GO_REGULATION_OF_CELLULAR_RESPONSE_TO_STRESS	PUJANA_ATM_PCC_NETWORK		GO_REGULATION_OF_RESPONSE_TO_STRESS	GO_CELLULAR_RESPONSE_TO_DNA_DAMAGE_STIMULUS		MARSON_BOUND_BY_E2F4_UNSTIMULATED					GO_CELLULAR_RESPONSE_TO_STRESS					GO_REGULATION_OF_RESPONSE_TO_DNA_DAMAGE_STIMULUS	GO_DNA_METABOLIC_PROCESS					LU_EZH2_TARGETS_DN	GO_BASE_EXCISION_REPAIR				GO_CHROMOSOME_ORGANIZATION	GO_DNA_RECOMBINATION	WHITFIELD_CELL_CYCLE_S						PILON_KLF1_TARGETS_DN	ZHOU_CELL_CYCLE_GENES_IN_IR_RESPONSE_24HR
22836	RHOBTB3	Rho-related BTB domain containing 3		BENPORATH_CYCLING_GENES			GEORGES_TARGETS_OF_MIR192_AND_MIR215		GO_ENZYME_BINDING																																WHITFIELD_CELL_CYCLE_S		GO_ESTABLISHMENT_OF_LOCALIZATION_IN_CELL
11080	DNAJB4	DnaJ (Hsp40) homolog, subfamily B, member 4		BENPORATH_CYCLING_GENES			GEORGES_TARGETS_OF_MIR192_AND_MIR215				PUJANA_BRCA1_PCC_NETWORK		PUJANA_ATM_PCC_NETWORK																												WHITFIELD_CELL_CYCLE_S	NUYTTEN_EZH2_TARGETS_UP
4281	MID1	midline 1 (Opitz/BBB syndrome)		BENPORATH_CYCLING_GENES					GO_ENZYME_BINDING			GO_REGULATION_OF_CELLULAR_RESPONSE_TO_STRESS			GO_REGULATION_OF_RESPONSE_TO_STRESS					MODULE_54		FISCHER_G2_M_CELL_CYCLE																								GO_MICROTUBULE_CYTOSKELETON
10734	STAG3	stromal antigen 3		BENPORATH_CYCLING_GENES																							GO_REPRODUCTION												GO_CHROMOSOME_ORGANIZATION
259266	ASPM	asp (abnormal spindle) homolog, microcephaly associated (Drosophila)			NUYTTEN_EZH2_TARGETS_DN	FISCHER_DREAM_TARGETS	GEORGES_TARGETS_OF_MIR192_AND_MIR215	GOBERT_OLIGODENDROCYTE_DIFFERENTIATION_UP									DUTERTRE_ESTRADIOL_RESPONSE_24HR_UP	MARSON_BOUND_BY_E2F4_UNSTIMULATED		MODULE_54	GO_MULTICELLULAR_ORGANISM_REPRODUCTION	FISCHER_G2_M_CELL_CYCLE		DODD_NASOPHARYNGEAL_CARCINOMA_DN		KINSEY_TARGETS_OF_EWSR1_FLII_FUSION_UP	GO_REPRODUCTION			GOLDRATH_EFF_VS_MEMORY_CD8_TCELL_UP	GO_MALE_GAMETE_GENERATION		FUJII_YBX1_TARGETS_DN			LEE_EARLY_T_LYMPHOCYTE_UP	GO_MULTI_ORGANISM_REPRODUCTIVE_PROCESS	GO_GAMETE_GENERATION								GO_MICROTUBULE_CYTOSKELETON		ZHOU_CELL_CYCLE_GENES_IN_IR_RESPONSE_24HR
219844	HYLS1	hydrolethalus syndrome 1			NUYTTEN_EZH2_TARGETS_DN	FISCHER_DREAM_TARGETS	GEORGES_TARGETS_OF_MIR192_AND_MIR215	GOBERT_OLIGODENDROCYTE_DIFFERENTIATION_UP																		KINSEY_TARGETS_OF_EWSR1_FLII_FUSION_UP								LU_EZH2_TARGETS_DN										GSE4984_UNTREATED_VS_VEHICLE_CTRL_TREATED_DC_DN		GO_MICROTUBULE_CYTOSKELETON
219790	RTKN2	rhotekin 2			NUYTTEN_EZH2_TARGETS_DN	FISCHER_DREAM_TARGETS	GEORGES_TARGETS_OF_MIR192_AND_MIR215							GSE21670_UNTREATED_VS_TGFB_IL6_TREATED_CD4_TCELL_UP																														GSE4984_UNTREATED_VS_VEHICLE_CTRL_TREATED_DC_DN
1870	E2F2	E2F transcription factor 2			NUYTTEN_EZH2_TARGETS_DN	FISCHER_DREAM_TARGETS		GOBERT_OLIGODENDROCYTE_DIFFERENTIATION_UP									DUTERTRE_ESTRADIOL_RESPONSE_24HR_UP									KINSEY_TARGETS_OF_EWSR1_FLII_FUSION_UP										LEE_EARLY_T_LYMPHOCYTE_UP											PILON_KLF1_TARGETS_DN
8368	HIST1H4L	histone cluster 1, H4l			NUYTTEN_EZH2_TARGETS_DN	FISCHER_DREAM_TARGETS					PUJANA_BRCA1_PCC_NETWORK		PUJANA_ATM_PCC_NETWORK			GO_CELLULAR_RESPONSE_TO_DNA_DAMAGE_STIMULUS							GO_CELLULAR_RESPONSE_TO_STRESS						GO_DNA_METABOLIC_PROCESS										GO_CHROMOSOME_ORGANIZATION
115752	DIS3L	DIS3 mitotic control homolog (S. cerevisiae)-like			NUYTTEN_EZH2_TARGETS_DN		GEORGES_TARGETS_OF_MIR192_AND_MIR215		GO_ENZYME_BINDING					GSE21670_UNTREATED_VS_TGFB_IL6_TREATED_CD4_TCELL_UP																															GO_HYDROLASE_ACTIVITY_ACTING_ON_ESTER_BONDS	GO_MICROTUBULE_CYTOSKELETON
23576	DDAH1	dimethylarginine dimethylaminohydrolase 1			NUYTTEN_EZH2_TARGETS_DN			GOBERT_OLIGODENDROCYTE_DIFFERENTIATION_UP											BRUINS_UVC_RESPONSE_LATE															LU_EZH2_TARGETS_DN
84953	MICALCL	MICAL C-terminal like			NUYTTEN_EZH2_TARGETS_DN				GO_ENZYME_BINDING												GO_MULTICELLULAR_ORGANISM_REPRODUCTION						GO_REPRODUCTION				GO_MALE_GAMETE_GENERATION						GO_MULTI_ORGANISM_REPRODUCTIVE_PROCESS	GO_GAMETE_GENERATION
3775	KCNK1	potassium channel, subfamily K, member 1			NUYTTEN_EZH2_TARGETS_DN					NUYTTEN_NIPP1_TARGETS_DN																						SCHAEFFER_PROSTATE_DEVELOPMENT_48HR_UP
83640	FAM103A1	family with sequence similarity 103, member A1			NUYTTEN_EZH2_TARGETS_DN													MARSON_BOUND_BY_E2F4_UNSTIMULATED
55850	USE1	unconventional SNARE in the ER 1 homolog (S. cerevisiae)			NUYTTEN_EZH2_TARGETS_DN														BRUINS_UVC_RESPONSE_LATE																								GO_ESTABLISHMENT_OF_LOCALIZATION_IN_CELL
51361	HOOK1	hook homolog 1 (Drosophila)			NUYTTEN_EZH2_TARGETS_DN																GO_MULTICELLULAR_ORGANISM_REPRODUCTION					KINSEY_TARGETS_OF_EWSR1_FLII_FUSION_UP	GO_REPRODUCTION				GO_MALE_GAMETE_GENERATION						GO_MULTI_ORGANISM_REPRODUCTIVE_PROCESS	GO_GAMETE_GENERATION					GO_ESTABLISHMENT_OF_LOCALIZATION_IN_CELL	GSE4984_UNTREATED_VS_VEHICLE_CTRL_TREATED_DC_DN		GO_MICROTUBULE_CYTOSKELETON
23035	PHLPP2	PH domain and leucine rich repeat protein phosphatase 2			NUYTTEN_EZH2_TARGETS_DN																					KINSEY_TARGETS_OF_EWSR1_FLII_FUSION_UP								LU_EZH2_TARGETS_DN											GO_HYDROLASE_ACTIVITY_ACTING_ON_ESTER_BONDS
57157	PHTF2	putative homeodomain transcription factor 2				FISCHER_DREAM_TARGETS	GEORGES_TARGETS_OF_MIR192_AND_MIR215				PUJANA_BRCA1_PCC_NETWORK		PUJANA_ATM_PCC_NETWORK																												WHITFIELD_CELL_CYCLE_S
6877	TAF5	TAF5 RNA polymerase II, TATA box binding protein (TBP)-associated factor, 100kDa				FISCHER_DREAM_TARGETS		GOBERT_OLIGODENDROCYTE_DIFFERENTIATION_UP			PUJANA_BRCA1_PCC_NETWORK		PUJANA_ATM_PCC_NETWORK	GSE21670_UNTREATED_VS_TGFB_IL6_TREATED_CD4_TCELL_UP										DODD_NASOPHARYNGEAL_CARCINOMA_DN	GO_CATALYTIC_COMPLEX	KINSEY_TARGETS_OF_EWSR1_FLII_FUSION_UP								LU_EZH2_TARGETS_DN					GO_CHROMOSOME_ORGANIZATION								PILON_KLF1_TARGETS_DN
835	CASP2	caspase 2, apoptosis-related cysteine peptidase				FISCHER_DREAM_TARGETS			GO_ENZYME_BINDING		PUJANA_BRCA1_PCC_NETWORK		PUJANA_ATM_PCC_NETWORK			GO_CELLULAR_RESPONSE_TO_DNA_DAMAGE_STIMULUS					GO_MULTICELLULAR_ORGANISM_REPRODUCTION		GO_CELLULAR_RESPONSE_TO_STRESS				GO_REPRODUCTION						FUJII_YBX1_TARGETS_DN	LU_EZH2_TARGETS_DN							WHITFIELD_CELL_CYCLE_S
5930	RBBP6	retinoblastoma binding protein 6				FISCHER_DREAM_TARGETS					PUJANA_BRCA1_PCC_NETWORK		PUJANA_ATM_PCC_NETWORK			GO_CELLULAR_RESPONSE_TO_DNA_DAMAGE_STIMULUS							GO_CELLULAR_RESPONSE_TO_STRESS						GO_DNA_METABOLIC_PROCESS													NUYTTEN_EZH2_TARGETS_UP				GO_MICROTUBULE_CYTOSKELETON
22823	MTF2	metal response element binding transcription factor 2				FISCHER_DREAM_TARGETS					PUJANA_BRCA1_PCC_NETWORK		PUJANA_ATM_PCC_NETWORK											DODD_NASOPHARYNGEAL_CARCINOMA_DN	GO_CATALYTIC_COMPLEX									LU_EZH2_TARGETS_DN					GO_CHROMOSOME_ORGANIZATION
163227	ZNF100	zinc finger protein 100				FISCHER_DREAM_TARGETS																		DODD_NASOPHARYNGEAL_CARCINOMA_DN
29887	SNX10	sorting nexin 10					GEORGES_TARGETS_OF_MIR192_AND_MIR215		GO_ENZYME_BINDING	NUYTTEN_NIPP1_TARGETS_DN														DODD_NASOPHARYNGEAL_CARCINOMA_DN						GOLDRATH_EFF_VS_MEMORY_CD8_TCELL_UP																GO_MICROTUBULE_CYTOSKELETON
5641	LGMN	legumain					GEORGES_TARGETS_OF_MIR192_AND_MIR215								GO_REGULATION_OF_RESPONSE_TO_STRESS																											NUYTTEN_EZH2_TARGETS_UP
143888	KDELC2	KDEL (Lys-Asp-Glu-Leu) containing 2					GEORGES_TARGETS_OF_MIR192_AND_MIR215												BRUINS_UVC_RESPONSE_LATE
27345	KCNMB4	potassium large conductance calcium-activated channel, subfamily M, beta member 4					GEORGES_TARGETS_OF_MIR192_AND_MIR215																									SCHAEFFER_PROSTATE_DEVELOPMENT_48HR_UP
170384	FUT11	fucosyltransferase 11 (alpha (1,3) fucosyltransferase)					GEORGES_TARGETS_OF_MIR192_AND_MIR215																																			NUYTTEN_EZH2_TARGETS_UP					PILON_KLF1_TARGETS_DN
160335	TMTC2	transmembrane and tetratricopeptide repeat containing 2					GEORGES_TARGETS_OF_MIR192_AND_MIR215																																			NUYTTEN_EZH2_TARGETS_UP
3800	KIF5C	kinesin family member 5C					GEORGES_TARGETS_OF_MIR192_AND_MIR215																																				GO_ESTABLISHMENT_OF_LOCALIZATION_IN_CELL			GO_MICROTUBULE_CYTOSKELETON
283537	SLC46A3	solute carrier family 46, member 3					GEORGES_TARGETS_OF_MIR192_AND_MIR215
27330	RPS6KA6	ribosomal protein S6 kinase, 90kDa, polypeptide 6						GOBERT_OLIGODENDROCYTE_DIFFERENTIATION_UP								GO_CELLULAR_RESPONSE_TO_DNA_DAMAGE_STIMULUS							GO_CELLULAR_RESPONSE_TO_STRESS
126393	HSPB6	heat shock protein, alpha-crystallin-related, B6						GOBERT_OLIGODENDROCYTE_DIFFERENTIATION_UP										MARSON_BOUND_BY_E2F4_UNSTIMULATED																										GSE4984_UNTREATED_VS_VEHICLE_CTRL_TREATED_DC_DN
5867	RAB4A	RAB4A, member RAS oncogene family							GO_ENZYME_BINDING	NUYTTEN_NIPP1_TARGETS_DN																						SCHAEFFER_PROSTATE_DEVELOPMENT_48HR_UP											GO_ESTABLISHMENT_OF_LOCALIZATION_IN_CELL
3065	HDAC1	histone deacetylase 1							GO_ENZYME_BINDING		PUJANA_BRCA1_PCC_NETWORK		PUJANA_ATM_PCC_NETWORK												GO_CATALYTIC_COMPLEX														GO_CHROMOSOME_ORGANIZATION								PILON_KLF1_TARGETS_DN
6272	SORT1	sortilin 1							GO_ENZYME_BINDING		PUJANA_BRCA1_PCC_NETWORK																																GO_ESTABLISHMENT_OF_LOCALIZATION_IN_CELL						GO_ENVELOPE
9025	RNF8	ring finger protein 8							GO_ENZYME_BINDING			GO_REGULATION_OF_CELLULAR_RESPONSE_TO_STRESS			GO_REGULATION_OF_RESPONSE_TO_STRESS	GO_CELLULAR_RESPONSE_TO_DNA_DAMAGE_STIMULUS		MARSON_BOUND_BY_E2F4_UNSTIMULATED			GO_MULTICELLULAR_ORGANISM_REPRODUCTION		GO_CELLULAR_RESPONSE_TO_STRESS		GO_CATALYTIC_COMPLEX		GO_REPRODUCTION	GO_REGULATION_OF_RESPONSE_TO_DNA_DAMAGE_STIMULUS	GO_DNA_METABOLIC_PROCESS		GO_MALE_GAMETE_GENERATION						GO_MULTI_ORGANISM_REPRODUCTIVE_PROCESS	GO_GAMETE_GENERATION	GO_CHROMOSOME_ORGANIZATION	GO_DNA_RECOMBINATION
154	ADRB2	adrenergic, beta-2-, receptor, surface							GO_ENZYME_BINDING			GO_REGULATION_OF_CELLULAR_RESPONSE_TO_STRESS			GO_REGULATION_OF_RESPONSE_TO_STRESS				BRUINS_UVC_RESPONSE_LATE		GO_MULTICELLULAR_ORGANISM_REPRODUCTION		GO_CELLULAR_RESPONSE_TO_STRESS				GO_REPRODUCTION										GO_MULTI_ORGANISM_REPRODUCTIVE_PROCESS					NUYTTEN_EZH2_TARGETS_UP	GO_ESTABLISHMENT_OF_LOCALIZATION_IN_CELL
27063	ANKRD1	ankyrin repeat domain 1 (cardiac muscle)							GO_ENZYME_BINDING			GO_REGULATION_OF_CELLULAR_RESPONSE_TO_STRESS			GO_REGULATION_OF_RESPONSE_TO_STRESS				BRUINS_UVC_RESPONSE_LATE				GO_CELLULAR_RESPONSE_TO_STRESS					GO_REGULATION_OF_RESPONSE_TO_DNA_DAMAGE_STIMULUS				SCHAEFFER_PROSTATE_DEVELOPMENT_48HR_UP
529	ATP6V1E1	ATPase, H+ transporting, lysosomal 31kDa, V1 subunit E1							GO_ENZYME_BINDING			GO_REGULATION_OF_CELLULAR_RESPONSE_TO_STRESS			GO_REGULATION_OF_RESPONSE_TO_STRESS				BRUINS_UVC_RESPONSE_LATE
2931	GSK3A	glycogen synthase kinase 3 alpha							GO_ENZYME_BINDING			GO_REGULATION_OF_CELLULAR_RESPONSE_TO_STRESS			GO_REGULATION_OF_RESPONSE_TO_STRESS								GO_CELLULAR_RESPONSE_TO_STRESS																				GO_ESTABLISHMENT_OF_LOCALIZATION_IN_CELL
11329	STK38	serine/threonine kinase 38							GO_ENZYME_BINDING				PUJANA_ATM_PCC_NETWORK												GO_CATALYTIC_COMPLEX																						PILON_KLF1_TARGETS_DN
7133	TNFRSF1B	tumor necrosis factor receptor superfamily, member 1B							GO_ENZYME_BINDING						GO_REGULATION_OF_RESPONSE_TO_STRESS	GO_CELLULAR_RESPONSE_TO_DNA_DAMAGE_STIMULUS							GO_CELLULAR_RESPONSE_TO_STRESS
6879	TAF7	TAF7 RNA polymerase II, TATA box binding protein (TBP)-associated factor, 55kDa							GO_ENZYME_BINDING																GO_CATALYTIC_COMPLEX
9099	USP2	ubiquitin specific peptidase 2							GO_ENZYME_BINDING																							SCHAEFFER_PROSTATE_DEVELOPMENT_48HR_UP														GO_MICROTUBULE_CYTOSKELETON
54521	WDR44	WD repeat domain 44							GO_ENZYME_BINDING																																					GO_MICROTUBULE_CYTOSKELETON
1476	CSTB	cystatin B (stefin B)							GO_ENZYME_BINDING
8436	SDPR	serum deprivation response							GO_ENZYME_BINDING
1803	DPP4	dipeptidyl-peptidase 4							GO_ENZYME_BINDING
7351	UCP2	uncoupling protein 2 (mitochondrial, proton carrier)								NUYTTEN_NIPP1_TARGETS_DN	PUJANA_BRCA1_PCC_NETWORK		PUJANA_ATM_PCC_NETWORK										GO_CELLULAR_RESPONSE_TO_STRESS				GO_REPRODUCTION										GO_MULTI_ORGANISM_REPRODUCTIVE_PROCESS						GO_ESTABLISHMENT_OF_LOCALIZATION_IN_CELL						GO_ENVELOPE
5537	PPP6C	protein phosphatase 6, catalytic subunit								NUYTTEN_NIPP1_TARGETS_DN	PUJANA_BRCA1_PCC_NETWORK															KINSEY_TARGETS_OF_EWSR1_FLII_FUSION_UP																	GO_ESTABLISHMENT_OF_LOCALIZATION_IN_CELL		GO_HYDROLASE_ACTIVITY_ACTING_ON_ESTER_BONDS
8091	HMGA2	high mobility group AT-hook 2								NUYTTEN_NIPP1_TARGETS_DN		GO_REGULATION_OF_CELLULAR_RESPONSE_TO_STRESS			GO_REGULATION_OF_RESPONSE_TO_STRESS	GO_CELLULAR_RESPONSE_TO_DNA_DAMAGE_STIMULUS			BRUINS_UVC_RESPONSE_LATE			FISCHER_G2_M_CELL_CYCLE	GO_CELLULAR_RESPONSE_TO_STRESS					GO_REGULATION_OF_RESPONSE_TO_DNA_DAMAGE_STIMULUS	GO_DNA_METABOLIC_PROCESS						GO_BASE_EXCISION_REPAIR				GO_CHROMOSOME_ORGANIZATION			NUYTTEN_EZH2_TARGETS_UP			GO_HYDROLASE_ACTIVITY_ACTING_ON_ESTER_BONDS		PILON_KLF1_TARGETS_DN
523	ATP6V1A	ATPase, H+ transporting, lysosomal 70kDa, V1 subunit A								NUYTTEN_NIPP1_TARGETS_DN		GO_REGULATION_OF_CELLULAR_RESPONSE_TO_STRESS			GO_REGULATION_OF_RESPONSE_TO_STRESS															GOLDRATH_EFF_VS_MEMORY_CD8_TCELL_UP												NUYTTEN_EZH2_TARGETS_UP
171586	ABHD3	abhydrolase domain containing 3								NUYTTEN_NIPP1_TARGETS_DN			PUJANA_ATM_PCC_NETWORK													KINSEY_TARGETS_OF_EWSR1_FLII_FUSION_UP																			GO_HYDROLASE_ACTIVITY_ACTING_ON_ESTER_BONDS
54855	FAM46C	family with sequence similarity 46, member C								NUYTTEN_NIPP1_TARGETS_DN							DUTERTRE_ESTRADIOL_RESPONSE_24HR_UP
80312	TET1	tet methylcytosine dioxygenase 1								NUYTTEN_NIPP1_TARGETS_DN														DODD_NASOPHARYNGEAL_CARCINOMA_DN					GO_DNA_METABOLIC_PROCESS										GO_CHROMOSOME_ORGANIZATION
51808	PHAX	phosphorylated adaptor for RNA export								NUYTTEN_NIPP1_TARGETS_DN																																	GO_ESTABLISHMENT_OF_LOCALIZATION_IN_CELL			GO_MICROTUBULE_CYTOSKELETON	PILON_KLF1_TARGETS_DN
399664	MEX3D	mex-3 homolog D (C. elegans)								NUYTTEN_NIPP1_TARGETS_DN
9052	GPRC5A	G protein-coupled receptor, family C, group 5, member A								NUYTTEN_NIPP1_TARGETS_DN
10018	BCL2L11	BCL2-like 11 (apoptosis facilitator)									PUJANA_BRCA1_PCC_NETWORK	GO_REGULATION_OF_CELLULAR_RESPONSE_TO_STRESS	PUJANA_ATM_PCC_NETWORK		GO_REGULATION_OF_RESPONSE_TO_STRESS	GO_CELLULAR_RESPONSE_TO_DNA_DAMAGE_STIMULUS					GO_MULTICELLULAR_ORGANISM_REPRODUCTION		GO_CELLULAR_RESPONSE_TO_STRESS	DODD_NASOPHARYNGEAL_CARCINOMA_DN	GO_CATALYTIC_COMPLEX		GO_REPRODUCTION				GO_MALE_GAMETE_GENERATION						GO_MULTI_ORGANISM_REPRODUCTIVE_PROCESS	GO_GAMETE_GENERATION					GO_ESTABLISHMENT_OF_LOCALIZATION_IN_CELL			GO_MICROTUBULE_CYTOSKELETON			GO_ENVELOPE
51606	ATP6V1H	ATPase, H+ transporting, lysosomal 50/57kDa, V1 subunit H									PUJANA_BRCA1_PCC_NETWORK	GO_REGULATION_OF_CELLULAR_RESPONSE_TO_STRESS			GO_REGULATION_OF_RESPONSE_TO_STRESS				BRUINS_UVC_RESPONSE_LATE
2959	GTF2B	general transcription factor IIB									PUJANA_BRCA1_PCC_NETWORK		PUJANA_ATM_PCC_NETWORK																	GOLDRATH_EFF_VS_MEMORY_CD8_TCELL_UP												NUYTTEN_EZH2_TARGETS_UP
5291	PIK3CB	phosphoinositide-3-kinase, catalytic, beta polypeptide									PUJANA_BRCA1_PCC_NETWORK														GO_CATALYTIC_COMPLEX																	NUYTTEN_EZH2_TARGETS_UP
80237	ELL3	elongation factor RNA polymerase II-like 3										GO_REGULATION_OF_CELLULAR_RESPONSE_TO_STRESS			GO_REGULATION_OF_RESPONSE_TO_STRESS						GO_MULTICELLULAR_ORGANISM_REPRODUCTION						GO_REPRODUCTION	GO_REGULATION_OF_RESPONSE_TO_DNA_DAMAGE_STIMULUS			GO_MALE_GAMETE_GENERATION						GO_MULTI_ORGANISM_REPRODUCTIVE_PROCESS	GO_GAMETE_GENERATION
59343	SENP2	SUMO1/sentrin/SMT3 specific peptidase 2										GO_REGULATION_OF_CELLULAR_RESPONSE_TO_STRESS			GO_REGULATION_OF_RESPONSE_TO_STRESS												GO_REPRODUCTION	GO_REGULATION_OF_RESPONSE_TO_DNA_DAMAGE_STIMULUS						LU_EZH2_TARGETS_DN															GO_ENVELOPE
2882	GPX7	glutathione peroxidase 7											PUJANA_ATM_PCC_NETWORK						BRUINS_UVC_RESPONSE_LATE																									GSE4984_UNTREATED_VS_VEHICLE_CTRL_TREATED_DC_DN
1212	CLTB	clathrin, light chain B											PUJANA_ATM_PCC_NETWORK																														GO_ESTABLISHMENT_OF_LOCALIZATION_IN_CELL
9750	FAM65B	family with sequence similarity 65, member B											PUJANA_ATM_PCC_NETWORK																																		PILON_KLF1_TARGETS_DN
205564	SENP5	SUMO1/sentrin specific peptidase 5											PUJANA_ATM_PCC_NETWORK
7057	THBS1	thrombospondin 1													GO_REGULATION_OF_RESPONSE_TO_STRESS								GO_CELLULAR_RESPONSE_TO_STRESS											LU_EZH2_TARGETS_DN								NUYTTEN_EZH2_TARGETS_UP
130340	AP1S3	adaptor-related protein complex 1, sigma 3 subunit													GO_REGULATION_OF_RESPONSE_TO_STRESS																	SCHAEFFER_PROSTATE_DEVELOPMENT_48HR_UP											GO_ESTABLISHMENT_OF_LOCALIZATION_IN_CELL
6288	SAA1	serum amyloid A1													GO_REGULATION_OF_RESPONSE_TO_STRESS																											NUYTTEN_EZH2_TARGETS_UP				GO_MICROTUBULE_CYTOSKELETON
339834	CCDC36	coiled-coil domain containing 36													GO_REGULATION_OF_RESPONSE_TO_STRESS
10017	BCL2L10	BCL2-like 10 (apoptosis facilitator)														GO_CELLULAR_RESPONSE_TO_DNA_DAMAGE_STIMULUS					GO_MULTICELLULAR_ORGANISM_REPRODUCTION		GO_CELLULAR_RESPONSE_TO_STRESS				GO_REPRODUCTION				GO_MALE_GAMETE_GENERATION						GO_MULTI_ORGANISM_REPRODUCTIVE_PROCESS	GO_GAMETE_GENERATION											GO_ENVELOPE
135458	HUS1B	HUS1 checkpoint homolog b (S. pombe)														GO_CELLULAR_RESPONSE_TO_DNA_DAMAGE_STIMULUS							GO_CELLULAR_RESPONSE_TO_STRESS				GO_REPRODUCTION		GO_DNA_METABOLIC_PROCESS											GO_DNA_RECOMBINATION
10556	RPP30	ribonuclease P/MRP 30kDa subunit																MARSON_BOUND_BY_E2F4_UNSTIMULATED	BRUINS_UVC_RESPONSE_LATE						GO_CATALYTIC_COMPLEX																				GO_HYDROLASE_ACTIVITY_ACTING_ON_ESTER_BONDS		PILON_KLF1_TARGETS_DN
3024	HIST1H1A	histone cluster 1, H1a																MARSON_BOUND_BY_E2F4_UNSTIMULATED			GO_MULTICELLULAR_ORGANISM_REPRODUCTION						GO_REPRODUCTION				GO_MALE_GAMETE_GENERATION						GO_MULTI_ORGANISM_REPRODUCTIVE_PROCESS	GO_GAMETE_GENERATION	GO_CHROMOSOME_ORGANIZATION
84529	C15orf41	chromosome 15 open reading frame 41																MARSON_BOUND_BY_E2F4_UNSTIMULATED
4322	MMP13	matrix metallopeptidase 13 (collagenase 3)																	BRUINS_UVC_RESPONSE_LATE		GO_MULTICELLULAR_ORGANISM_REPRODUCTION		GO_CELLULAR_RESPONSE_TO_STRESS				GO_REPRODUCTION										GO_MULTI_ORGANISM_REPRODUCTIVE_PROCESS					NUYTTEN_EZH2_TARGETS_UP
11172	INSL6	insulin-like 6																	BRUINS_UVC_RESPONSE_LATE		GO_MULTICELLULAR_ORGANISM_REPRODUCTION						GO_REPRODUCTION				GO_MALE_GAMETE_GENERATION	SCHAEFFER_PROSTATE_DEVELOPMENT_48HR_UP					GO_MULTI_ORGANISM_REPRODUCTIVE_PROCESS	GO_GAMETE_GENERATION
51118	UTP11L	UTP11-like, U3 small nucleolar ribonucleoprotein, (yeast)																	BRUINS_UVC_RESPONSE_LATE																												PILON_KLF1_TARGETS_DN
26123	TCTN3	tectonic family member 3																	BRUINS_UVC_RESPONSE_LATE
84267	C9orf64	chromosome 9 open reading frame 64																	BRUINS_UVC_RESPONSE_LATE
353189	SLCO4C1	solute carrier organic anion transporter family, member 4C1																			GO_MULTICELLULAR_ORGANISM_REPRODUCTION						GO_REPRODUCTION				GO_MALE_GAMETE_GENERATION	SCHAEFFER_PROSTATE_DEVELOPMENT_48HR_UP					GO_MULTI_ORGANISM_REPRODUCTIVE_PROCESS	GO_GAMETE_GENERATION
3010	HIST1H1T	histone cluster 1, H1t																			GO_MULTICELLULAR_ORGANISM_REPRODUCTION						GO_REPRODUCTION				GO_MALE_GAMETE_GENERATION						GO_MULTI_ORGANISM_REPRODUCTIVE_PROCESS	GO_GAMETE_GENERATION	GO_CHROMOSOME_ORGANIZATION					GSE4984_UNTREATED_VS_VEHICLE_CTRL_TREATED_DC_DN
221400	TDRD6	tudor domain containing 6																			GO_MULTICELLULAR_ORGANISM_REPRODUCTION						GO_REPRODUCTION				GO_MALE_GAMETE_GENERATION						GO_MULTI_ORGANISM_REPRODUCTIVE_PROCESS	GO_GAMETE_GENERATION
80020	FOXRED2	FAD-dependent oxidoreductase domain containing 2																					GO_CELLULAR_RESPONSE_TO_STRESS	DODD_NASOPHARYNGEAL_CARCINOMA_DN		KINSEY_TARGETS_OF_EWSR1_FLII_FUSION_UP
4345	CD200	CD200 molecule																						DODD_NASOPHARYNGEAL_CARCINOMA_DN																				GSE4984_UNTREATED_VS_VEHICLE_CTRL_TREATED_DC_DN
1371	CPOX	coproporphyrinogen oxidase																						DODD_NASOPHARYNGEAL_CARCINOMA_DN																									GO_ENVELOPE
7546	ZIC2	Zic family member 2																						DODD_NASOPHARYNGEAL_CARCINOMA_DN
5376	PMP22	peripheral myelin protein 22																						DODD_NASOPHARYNGEAL_CARCINOMA_DN
79966	SCD5	stearoyl-CoA desaturase 5																						DODD_NASOPHARYNGEAL_CARCINOMA_DN
56339	METTL3	methyltransferase like 3																							GO_CATALYTIC_COMPLEX								FUJII_YBX1_TARGETS_DN
84108	PCGF6	polycomb group ring finger 6																							GO_CATALYTIC_COMPLEX																						PILON_KLF1_TARGETS_DN
2026	ENO2	enolase 2 (gamma, neuronal)																							GO_CATALYTIC_COMPLEX
9630	GNA14	guanine nucleotide binding protein (G protein), alpha 14																							GO_CATALYTIC_COMPLEX
6884	TAF13	TAF13 RNA polymerase II, TATA box binding protein (TBP)-associated factor, 18kDa																							GO_CATALYTIC_COMPLEX
84779	NAA11	N(alpha)-acetyltransferase 11, NatA catalytic subunit																							GO_CATALYTIC_COMPLEX
346171	ZFP57	zinc finger protein 57 homolog (mouse)																											GO_DNA_METABOLIC_PROCESS
3958	LGALS3	lectin, galactoside-binding, soluble, 3																												GOLDRATH_EFF_VS_MEMORY_CD8_TCELL_UP												NUYTTEN_EZH2_TARGETS_UP					PILON_KLF1_TARGETS_DN		GO_ENVELOPE
1001	CDH3	cadherin 3, type 1, P-cadherin (placental)																														SCHAEFFER_PROSTATE_DEVELOPMENT_48HR_UP
79683	ZDHHC14	zinc finger, DHHC-type containing 14																														SCHAEFFER_PROSTATE_DEVELOPMENT_48HR_UP
2888	GRB14	growth factor receptor-bound protein 14																																LU_EZH2_TARGETS_DN
85453	TSPYL5	TSPY-like 5																																					GO_CHROMOSOME_ORGANIZATION
338657	CCDC84	coiled-coil domain containing 84																																							WHITFIELD_CELL_CYCLE_S
58472	SQRDL	sulfide quinone reductase-like (yeast)																																								NUYTTEN_EZH2_TARGETS_UP						ZHOU_CELL_CYCLE_GENES_IN_IR_RESPONSE_24HR	GO_ENVELOPE
54877	ZCCHC2	zinc finger, CCHC domain containing 2																																								NUYTTEN_EZH2_TARGETS_UP
54809	SAMD9	sterile alpha motif domain containing 9																																								NUYTTEN_EZH2_TARGETS_UP
10482	NXF1	nuclear RNA export factor 1																																									GO_ESTABLISHMENT_OF_LOCALIZATION_IN_CELL						GO_ENVELOPE
27095	TRAPPC3	trafficking protein particle complex 3																																									GO_ESTABLISHMENT_OF_LOCALIZATION_IN_CELL
55275	VPS53	vacuolar protein sorting 53 homolog (S. cerevisiae)																																									GO_ESTABLISHMENT_OF_LOCALIZATION_IN_CELL
255928	SYT14	synaptotagmin XIV																																									GO_ESTABLISHMENT_OF_LOCALIZATION_IN_CELL
65080	MRPL44	mitochondrial ribosomal protein L44																																											GO_HYDROLASE_ACTIVITY_ACTING_ON_ESTER_BONDS		PILON_KLF1_TARGETS_DN		GO_ENVELOPE
10380	BPNT1	3'(2'), 5'-bisphosphate nucleotidase 1																																											GO_HYDROLASE_ACTIVITY_ACTING_ON_ESTER_BONDS
2151	F2RL2	coagulation factor II (thrombin) receptor-like 2																																											GO_HYDROLASE_ACTIVITY_ACTING_ON_ESTER_BONDS
7702	ZNF143	zinc finger protein 143																																													PILON_KLF1_TARGETS_DN
9615	GDA	guanine deaminase																																													PILON_KLF1_TARGETS_DN
83447	SLC25A31	solute carrier family 25 (mitochondrial carrier; adenine nucleotide translocator), member 31																																															GO_ENVELOPE
166336	PRICKLE2	prickle homolog 2 (Drosophila)																																															GO_ENVELOPE
84814	PPAPDC3	phosphatidic acid phosphatase type 2 domain containing 3																																															GO_ENVELOPE
6252	RTN1	reticulon 1
1008	CDH10	cadherin 10, type 2 (T2-cadherin)
1016	CDH18	cadherin 18, type 2
51186	WBP5	WW domain binding protein 5
79836	LONRF3	LON peptidase N-terminal domain and ring finger 3
55089	SLC38A4	solute carrier family 38, member 4
27094	KCNMB3	potassium large conductance calcium-activated channel, subfamily M beta member 3
1830	DSG3	desmoglein 3
55510	DDX43	DEAD (Asp-Glu-Ala-Asp) box polypeptide 43
151827	LRRC34	leucine rich repeat containing 34
51136	RNFT1	ring finger protein, transmembrane 1
7727	ZNF174	zinc finger protein 174
121601	ANO4	anoctamin 4
166863	RBM46	RNA binding motif protein 46
317754	POTED	POTE ankyrin domain family, member D
[truncated: 53 more columns]
